# Supplementary material for: Ischemic heart disease-related mortality in Brazil, 2006 to 2020. A study of multiple causes of death
Source: Springer Nature journal article supplement (doi:10.1186/s12889-024-18162-0), 2024-03-19
Supplement: MOESM1 [file 26876574]

### Supplementary Material 1.

The files of each federative unit were separated into folders by year, and the following code was then applied:

```
Sub Macro1()
```

```
,
```

```
Dim xFile As String
```

```
xFile = Dir("C:\Users\EBastos\Desktop\Trabalho Luiz\2020" & "\*.xls")
```

```
Do While xFile <> ""
```

```
    Workbooks.Open "C:\Users\EBastos\Desktop\Trabalho Luiz\2020" & "\" &  
xFile
```

```
    xFile = Dir
```

```
    arquivo = ActiveWorkbook.Name
```

```
    Selection.End(xlDown).Select
```

```
    contador = ActiveCell.Row
```

```
    Selection.End(xlUp).Select
```

```
    Range("CJ1").Select
```

```
    ActiveCell.FormulaR1C1 = "Nome do Arquivo"
```

```
For i = 2 To contador
```

Cells(i, **88**).Value = ActiveWorkbook.Name

Next

Range(Selection, Selection.End(xlToLeft)).Select

Range(Selection, Selection.End(xlToRight)).Select

Range(Selection, Selection.End(xlDown)).Select

Selection.AutoFilter

Selection.AutoFilter Field:=**46**, Criteria1:="=i2\*" \_

, Operator:=xlFilterValues

Range("A1").Select

Range(Selection, Selection.End(xlToRight)).Select

Range(Selection, Selection.End(xlDown)).Select

Selection.Copy

ThisWorkbook.Activate

ActiveSheet.Select

Selection.PasteSpecial Paste:=xlPasteValues, Operation:=xlNone, SkipBlanks \_

:=False, Transpose:=False

Dim xCell As Range

For Each xCell In ActiveSheet.Columns(1).Cells

If Len(xCell) = 0 Then

```
xCell.Select  
  
Exit For  
  
End If  
  
Next  
  
Application.DisplayAlerts = False  
  
Workbooks(arquivo).Close  
  
Application.DisplayAlerts = True  
  
Loop  
  
End Sub
```

The first two bold highlights were replaced with the paths to the folders in which the files of the federative units corresponding to that specific year were saved. The third bold highlight corresponded to the first cell of the first column after the data. The fourth bold highlight corresponded to the total number of columns with data plus 1. The fifth term bold highlight corresponded to the number of the column where the underlying cause information that had to be filtered was located. The code opened each federative unit file for that year, filtered the underlying causes starting with "I2," copied all filtered data, and pasted them into a consolidated file. At the end of the entire process, there were 15 files remaining, one for each year, all of which displayed data for underlying causes beginning with "I2" for all federative units.

When the process was complete, a final data cleaning was performed. To accomplish that, the rows with underlying causes ranging from I20.0 to I25.9 were selected, and all the other rows were excluded. Following that, the asterisks of the associated causes (*i.e.*, those causes associated with the underlying cause) were excluded. Removing the asterisks was critical, as they would confuse the Excel formulas and generate duplicate calculations. Before excluding the asterisks, the initial asterisks (first letter) in the five columns of the associated causes were excluded. For that, the following formula was used: `IFERROR(RIGHT(CELL;LEN(CELL)-1;""))`, where CELL was the cell in which the first asterisk had to be cleared. Then, the “replace” function was used to

replace the asterisk term with a space. It is important to note that a tilde (“~”) must be inserted before the asterisk for this replacement to occur correctly. With this, the data will be correct and ready for the creation of formulas to start the analysis of recurrences of causes and associated causes.
