# Supplementary material for: Ischemic heart disease-related mortality in Brazil, 2006 to 2020. A study of multiple causes of death
Source: Springer Nature journal article supplement (doi:10.1186/s12889-024-18162-0), 2024-03-19
Supplement: MOESM2 [file 26876574]

## Supplementary Material 2.

A second code, indicated below, was applied to the files of each federative unit, which were separated into folders by year, in order to carry out a deeper analysis of the multiple causes.

```
Sub Macro1()
```

```
    Dim xFile As String
```

```
    xFile = Dir("C:\Users\EBastos\Desktop\Trabalho Luiz\2020" & "\*.xls")
```

```
    Do While xFile <> ""
```

```
        Workbooks.Open "C:\Users\EBastos\Desktop\Trabalho Luiz\2020" & "\" &  
xFile
```

```
        xFile = Dir
```

```
        arquivo = ActiveWorkbook.Name
```

```
        Selection.End(xlDown).Select
```

```
        contador = ActiveCell.Row
```

```
        Selection.End(xlUp).Select
```

```
        Range("CJ1").Select
```

```
        ActiveCell.FormulaR1C1 = "Nome do Arquivo"
```

```
        For i = 2 To contador
```

```
            Cells(i, 88).Value = ActiveWorkbook.Name
```

```
        Next
```

```
        Call Macro2
```

```
        Range("A1").Select
```

```
        Range(Selection, Selection.End(xlToRight)).Select
```

```
        Range(Selection, Selection.End(xlDown)).Select
```

```
        Selection.Copy
```

```

ThisWorkbook.Activate

ActiveSheet.Select

Selection.PasteSpecial Paste:=xlPasteValues, Operation:=xlNone, SkipBlanks _
:=False, Transpose:=False

Dim xCell As Range

For Each xCell In ActiveSheet.Columns(1).Cells

    If Len(xCell) = 0 Then

        xCell.Select

        Exit For

    End If

Next

Application.DisplayAlerts = False

Workbooks(arquivo).Close

Application.DisplayAlerts = True

Loop

End Sub

```

```

Sub Macro2()

    Selection.End(xlToRight).Select

    Range("CL2").Select

    ActiveCell.FormulaR1C1 = _

        "=IFERROR(IF(LEFT(RIGHT(RC[-49],LEN(RC[-49])-1),2)=""I2"",1,0),""")"

    Range("CL2").Select

```

Selection.Copy  
Range("CL2:CP2").Select  
ActiveSheet.Paste  
Range("CL2").Select  
Selection.End(xlToLeft).Select  
Selection.End(xlDown).Select  
ActiveCell.Offset(0, 2).Select  
Range(Selection, Selection.End(xlUp)).Select  
ActiveSheet.Paste  
Columns("CL:CL").Select  
Range("CL2").Activate  
Application.CutCopyMode = False  
Selection.Copy  
Columns("CL:CP").Select  
Range("CL2").Activate  
ActiveSheet.Paste  
Range("CL1").Select  
Application.CutCopyMode = False  
ActiveCell.FormulaR1C1 = "=RC[-49]"  
Range("CL1").Select  
Selection.Copy  
Range("CL1:CP1").Select  
ActiveSheet.Paste  
ActiveWindow.SmallScroll ToRight:=4

```
Range("CR1").Select
Application.CutCopyMode = False
ActiveCell.FormulaR1C1 = "Resumo"
Range("CR2").Select
Application.CutCopyMode = False
ActiveCell.FormulaR1C1 = "=SUM(RC[-6]:RC[-2])"
Range("CR2").Select
Selection.Copy
Selection.End(xlToLeft).Select
Selection.End(xlDown).Select
ActiveCell.Offset(0, 2).Select
Range(Selection, Selection.End(xlUp)).Select
ActiveSheet.Paste
Columns("CR:CR").Select
Selection.AutoFilter Field:=1, Criteria1:="0"
Rows("2:2").Select
Range("CR2").Activate
Range(Selection, Selection.End(xlDown)).Select
Selection.Delete Shift:=xlUp
Range("CR1").Select
ActiveSheet.ShowAllData
Selection.AutoFilter
End Sub
```

The first two bold highlights were replaced with the paths to the folders where the files of the federative units corresponding to that specific year were saved. The third bold highlight corresponded to the first cell of the first column after the data. The fourth bold highlight corresponded to the total number of columns with data plus 1.

The code above triggered Macro 2, and all the lines that did not contain at least one of the associated causes were deleted: LINHAA, LINHAB, LINHAC, LINHAD, or LINHAI, starting with “I2.” Then, manually, the process was repeated by applying the formula “INDEX(Sheet1!B:B;MATCH (AO2;Sheet1!B:B;0))”, where “AO2” was the item of LINHAA and “Sheet1!B:B” was the relationship of causes between I20.1 and I25.9. The formula was repeated for the five causes, and all the lines whose five items resulted in error in the formula were then excluded, thus eliminating all the lines that did not have any of the five causes between I20.1 and I25.9.

The bold highlights in Macro 2 indicate items that varied according to each base year. “CL”, corresponds to the third column after the original database, which extends by four additional columns until “CP”. “-49” indicates how many columns must be moved to the left to reach the LINHAA column. Finally, column “CR” is the second column after the five new columns created due to the causes LINHAA to LINHAI. The “CR” column has the function of facilitating the exclusion of all the lines whose five causes do not start in “I2.”

Following that, the asterisks of the subcauses associated with the underlying cause were excluded. Removing the asterisks was critical, as they would confuse the Excel formulas and generate duplicate calculations. Before excluding the asterisks, the initial asterisks (first letter) in the five columns as associated causes were excluded. For that, the following formula was used: IFERROR(RIGHT(CELL;LEN(CELL)-1;”), where CELL was the cell in which the first asterisk had to be cleared. With this, the data was correct and ready for the creation of formulas to start the analysis of recurrences of causes and associated causes.
