# Supplementary material for: Ischemic heart disease-related mortality in Brazil, 2006 to 2020. A study of multiple causes of death
Source: BMC Public Health. 2024 Mar 19;24:849. doi: 10.1186/s12889-024-18162-0 (PMC10949584; doi:10.1186/s12889-024-18162-0)
Supplement: Supplementary file 4 — Supplementary Material 4. [file 12889_2024_18162_MOESM4_ESM.xls]

## Sheet: All
		UCs	2006	2007	2008	2009	2010	2011	2012	2013	2014	2015	2016	2017	2018	2019	2020	TOTAL	%
		I219	23928	22832	23373	23199	26376	26622	26794	27895	25626	28103	26442	26094	27145	25890	22443	382762	0.666633
		E149	1457	1584	1668	1775	1924	2089	2087	2175	1928	2241	1840	1839	1949	1734	1461	27751	0.0483322
		I251	1360	1398	1410	1219	1137	1201	1217	1267	1570	1399	1457	1552	1417	1498	1307	20409	0.0355451
		I255	731	911	900	868	754	840	848	817	970	914	974	1060	1158	1120	992	13857	0.0241339
		I259	911	1013	942	863	961	906	757	830	804	817	925	957	848	860	855	13249	0.023075
		I248	1039	1137	1099	1049	828	770	694	699	594	621	454	394	371	322	270	10341	0.0180103
		J449	330	276	278	263	366	366	359	414	273	387	278	273	348	275	219	4705	0.00819441
		I210	230	234	192	229	291	344	395	359	272	308	243	300	411	427	323	4558	0.00793839
		E119	130	132	124	140	183	232	197	298	309	382	327	365	494	440	409	4162	0.0072487
		I64	286	286	270	251	269	335	330	326	271	290	248	235	266	207	199	4069	0.00708673
		E142	164	193	182	208	187	233	253	256	236	280	219	230	256	218	194	3309	0.00576308
		E788	168	162	190	179	223	254	285	270	219	258	230	200	178	164	133	3113	0.00542172
		E148	120	120	157	189	215	233	231	237	161	200	156	156	193	190	162	2720	0.00473726
		I249	58	51	52	66	88	107	99	145	139	176	228	259	258	324	317	2367	0.00412246
		J189	77	124	90	125	137	140	165	170	190	210	221	189	176	185	143	2342	0.00407892
		E669	132	108	91	131	143	172	154	186	153	188	143	166	165	198	135	2265	0.00394481
		F102	177	130	143	137	153	174	158	205	142	157	144	153	150	123	108	2254	0.00392565
		I420	158	160	146	187	149	138	129	150	162	120	153	156	130	161	103	2202	0.00383509
		I258	138	132	126	123	103	110	180	164	154	142	156	151	153	160	143	2135	0.0037184
		I429	118	100	123	107	132	133	134	119	95	118	94	95	116	100	75	1659	0.00288938
		I213	71	47	55	49	49	53	83	88	73	106	95	148	183	212	163	1475	0.00256892
		B572	102	97	86	97	121	99	118	128	83	98	77	81	91	91	73	1442	0.00251144
		I422	71	95	88	99	62	80	60	56	113	70	105	116	98	188	74	1375	0.00239475
		I209	128	87	98	101	116	102	90	98	79	88	65	72	91	77	66	1358	0.00236514
		I694	70	69	87	72	90	86	91	111	116	115	86	97	103	85	75	1353	0.00235644
		N189	61	80	73	65	82	81	101	100	99	97	98	105	95	108	78	1323	0.00230419
		I211	60	50	39	48	50	74	63	53	63	59	88	97	146	144	107	1141	0.00198721
		C61	44	51	54	56	73	63	85	76	83	94	86	72	73	89	74	1073	0.00186878
		E109	24	27	26	41	38	45	60	78	84	95	88	81	109	120	100	1016	0.0017695
		I678	62	65	77	71	57	76	70	81	67	95	68	67	58	50	47	1011	0.0017608
		G309	23	25	34	36	42	51	68	87	76	86	72	78	100	89	74	941	0.00163888
		J439	71	62	65	72	71	62	71	82	62	61	61	43	58	53	41	935	0.00162843
		J440	36	46	45	52	56	60	49	67	72	70	64	84	79	77	34	891	0.0015518
		E147	40	29	40	48	59	90	76	60	38	78	68	62	69	71	50	878	0.00152916
		B342	1	0	0	0	0	0	0	0	0	0	0	0	0	0	852	853	0.00148562
		E145	44	43	54	63	58	50	65	48	59	67	49	66	58	57	44	825	0.00143685
		E780	57	29	37	47	56	61	51	73	59	86	56	55	69	48	35	819	0.0014264
		N179	29	37	40	38	41	50	35	61	61	68	54	60	80	61	46	761	0.00132539
		I212	14	25	17	21	29	61	60	53	34	27	66	83	97	107	54	748	0.00130275
		I250	42	27	23	33	37	42	70	58	58	56	72	65	71	57	35	746	0.00129926
		C349	27	47	49	39	48	38	49	55	50	65	51	50	57	55	41	721	0.00125572
		I252	91	97	134	132	136	108	0	0	0	0	0	0	1	0	0	699	0.00121741
		I229	44	37	31	41	39	58	58	46	45	50	44	54	59	39	41	686	0.00119476
		E668	32	24	52	39	57	52	49	47	44	51	44	41	46	52	36	666	0.00115993
		A419	30	41	31	41	27	34	37	38	37	66	56	47	60	65	51	661	0.00115122
		E118	15	10	32	27	29	41	35	58	38	41	45	69	62	77	53	632	0.00110072
		K703	38	33	35	31	43	42	46	41	48	40	62	38	43	30	33	603	0.00105021
		E140	39	30	32	35	67	58	70	82	41	44	36	22	16	16	11	599	0.00104324
		J459	48	40	50	47	44	45	48	40	31	42	19	34	43	31	27	589	0.00102583
		N390	14	19	17	20	36	32	26	35	43	60	49	51	59	69	43	573	0.000997959
		J180	33	52	52	23	27	41	32	37	36	34	33	35	43	35	18	531	0.00092481
		N19	26	33	35	41	47	31	51	30	34	39	27	27	41	35	24	521	0.000907394
		E112	11	22	15	12	30	21	32	51	45	42	40	52	63	38	43	517	0.000900427
		K746	30	31	33	42	38	28	41	37	34	29	28	27	27	33	24	482	0.00083947
		E141	28	33	27	29	22	31	26	38	33	43	34	29	33	35	20	461	0.000802895
		I350	20	23	32	21	30	25	21	29	38	19	31	27	43	35	41	435	0.000757613
		E785	27	16	23	23	32	20	22	38	32	46	29	32	37	25	29	431	0.000750646
		I269	21	31	24	18	31	34	25	27	38	24	35	30	21	40	30	429	0.000747163
		I214	22	12	10	17	16	16	19	24	23	41	41	44	48	47	37	417	0.000726263
		J159	11	11	12	11	17	15	15	21	26	41	32	34	46	56	55	403	0.00070188
		I619	24	28	29	32	25	18	29	25	33	35	28	27	26	22	17	398	0.000693172
		E789	7	7	13	8	15	23	21	22	24	40	25	37	40	57	56	395	0.000687947
		I710	14	33	34	30	21	23	16	19	25	34	29	28	29	40	19	394	0.000686206
		E108	19	6	16	14	17	30	18	35	36	30	30	26	29	43	32	381	0.000663564
		C169	16	18	27	23	24	24	24	26	24	33	36	23	31	26	18	373	0.000649631
		E889	4	6	10	10	17	15	12	18	36	44	49	41	40	45	22	369	0.000642665
		I279	15	24	15	17	31	23	33	35	24	28	21	24	17	21	23	351	0.000611315
		G20	13	11	17	15	13	29	26	32	29	31	21	26	30	23	25	341	0.000593899
		E107	9	5	10	13	21	19	20	27	18	30	27	23	34	41	40	337	0.000586932
		E117	9	6	11	12	30	15	25	20	22	32	24	28	36	33	26	329	0.000572999
		I426	19	13	18	13	24	21	23	22	28	26	20	26	27	25	17	322	0.000560808
		G409	13	16	14	15	33	23	29	27	19	24	25	17	17	18	14	304	0.000529458
		C509	8	14	14	17	16	22	16	20	21	27	26	19	30	31	23	304	0.000529458
		D649	16	18	19	14	24	22	16	24	18	29	24	11	12	27	17	291	0.000506817
		I739	16	21	15	15	17	12	15	13	22	12	14	23	17	26	26	264	0.000459793
		I253	12	21	20	21	23	17	18	11	23	24	21	12	12	18	7	260	0.000452826
		A09	21	21	13	19	19	13	18	19	14	24	24	12	18	13	6	254	0.000442376
		I38	18	17	17	17	18	18	16	15	21	17	18	23	12	9	15	251	0.000437151
		E46	20	11	14	11	16	22	22	19	17	18	19	18	13	13	16	249	0.000433668
		I256	30	7	12	16	6	10	13	13	14	21	25	13	24	24	18	246	0.000428443
		I10	9	10	5	13	29	14	25	17	20	20	15	19	19	11	11	237	0.000412768
		J988	17	19	13	23	12	23	16	15	20	14	17	10	13	10	12	234	0.000407543
		E115	6	5	5	9	10	11	13	7	14	24	14	21	26	27	37	229	0.000398835
		K922	12	9	23	17	7	14	12	17	12	22	15	20	13	17	9	219	0.000381419
		C189	9	13	8	10	11	20	15	14	17	21	17	12	15	26	10	218	0.000379677
		E110	8	13	14	7	11	14	15	18	18	13	11	13	20	22	18	215	0.000374452
		I340	8	13	10	11	19	18	11	18	15	12	11	14	20	20	14	214	0.000372711
		I639	7	11	16	12	4	5	14	7	6	6	14	18	35	32	24	211	0.000367486
		J448	16	9	15	14	15	16	17	10	18	17	11	14	14	12	7	205	0.000357036
		I719	10	10	11	16	11	13	19	9	13	17	17	14	10	15	7	192	0.000334395
		E146	5	11	8	15	20	16	15	14	10	11	11	5	18	14	16	189	0.00032917
		I714	8	9	19	15	15	6	12	8	19	13	15	10	9	17	11	186	0.000323945
		J984	17	9	13	15	14	18	13	21	8	11	12	9	10	7	8	185	0.000322203
		E039	8	7	9	12	17	11	9	18	10	16	10	10	14	18	13	182	0.000316978
		C159	7	7	10	11	12	12	10	20	8	19	14	15	14	13	8	180	0.000313495
		K550	12	11	19	20	13	15	7	8	8	8	8	14	9	7	20	179	0.000311753
		J841	14	12	10	10	9	14	6	10	12	5	16	15	21	15	9	178	0.000310012
		C229	6	8	7	10	10	11	14	17	10	12	16	12	12	17	12	174	0.000303045
		J441	7	6	1	4	3	6	4	4	9	14	10	16	18	42	26	170	0.000296079
		E102	3	6	9	8	5	11	6	13	5	13	13	19	21	14	24	170	0.000296079
		C679	7	13	12	5	8	12	11	19	10	18	13	10	11	10	9	168	0.000292595
		K920	10	14	10	10	15	10	10	4	13	8	6	9	8	18	18	163	0.000283887
		I428	4	8	5	11	7	5	6	15	5	9	14	10	16	26	22	163	0.000283887
		E782	4	2	5	6	6	5	10	15	6	27	11	16	21	9	15	158	0.000275179
		I270	6	12	12	14	6	12	12	13	12	13	8	12	12	3	7	154	0.000268212
		W189	1	7	4	7	8	10	9	7	13	11	16	22	16	13	9	153	0.000266471
		I421	7	5	8	6	9	3	11	10	11	10	9	19	13	17	14	152	0.000264729
		J690	4	5	9	7	11	7	13	12	8	8	18	13	13	11	12	151	0.000262987
		I802	9	9	8	10	10	9	5	13	12	13	13	9	11	11	8	150	0.000261246
		Q249	9	10	12	11	8	17	18	10	13	6	6	7	8	10	4	149	0.000259504
		I718	6	10	15	16	6	4	9	17	11	10	8	12	4	10	10	148	0.000257762
		C259	11	5	10	9	5	9	5	10	8	9	14	8	12	15	17	147	0.000256021
		I713	10	10	7	10	6	13	11	8	16	7	10	9	12	9	9	147	0.000256021
		Q245	12	18	13	22	14	4	14	12	8	3	8	4	5	4	2	143	0.000249054
		C80	7	10	7	15	5	8	12	15	11	14	11	8	2	8	8	141	0.000245571
		E105	5	1	2	7	5	7	11	11	10	8	11	15	11	14	23	141	0.000245571
		E100	10	4	9	9	13	12	4	17	7	11	7	8	9	12	5	137	0.000238604
		E660	7	3	2	7	7	6	7	10	4	16	7	18	10	17	15	136	0.000236863
		E86	6	6	11	8	15	11	10	11	15	12	5	8	3	5	7	133	0.000231638
		I254	7	9	3	6	4	7	6	2	13	8	12	10	12	19	14	132	0.000229896
		K729	5	4	11	6	15	8	8	11	11	11	12	6	6	6	5	125	0.000217705
		M321	8	3	3	8	8	9	8	11	6	7	13	10	8	20	2	124	0.000215963
		E116	2	2	4	1	4	2	4	9	6	13	13	17	21	10	16	124	0.000215963
		Y349	8	1	12	9	3	9	9	4	10	12	6	5	11	15	9	123	0.000214222
		C329	4	6	9	5	9	9	11	8	8	7	11	6	9	12	9	123	0.000214222
		I351	6	9	6	12	7	8	6	8	8	10	5	8	9	7	10	119	0.000207255
		I220	9	9	11	8	10	10	6	4	8	7	6	5	18	4	3	118	0.000205513
		I609	8	10	4	7	5	5	4	5	10	5	9	12	8	14	12	118	0.000205513
		C260	4	6	8	4	5	1	11	8	7	10	13	13	9	10	9	118	0.000205513
		F109	2	6	8	7	6	8	6	5	0	11	9	8	11	15	16	118	0.000205513
		K859	0	0	0	3	6	10	15	8	16	8	8	15	12	7	10	118	0.000205513
		I698	9	5	7	3	10	4	7	7	7	11	9	15	8	7	6	115	0.000200288
		K769	4	8	6	14	6	4	6	9	8	8	11	6	9	5	11	115	0.000200288
		E111	4	7	4	3	5	6	5	10	9	9	10	14	11	12	6	115	0.000200288
		K704	9	12	4	9	7	6	12	6	1	6	6	8	12	9	6	113	0.000196805
		A162	5	9	6	11	11	7	2	8	11	5	10	8	6	7	7	113	0.000196805
		C539	3	7	7	2	5	7	9	11	8	13	8	12	5	10	6	113	0.000196805
		I672	17	14	12	9	7	10	3	8	11	6	5	2	4	1	3	112	0.000195064
		N039	1	2	1	2	1	7	5	1	7	8	5	19	14	20	19	112	0.000195064
		I059	5	12	6	10	11	8	11	8	7	8	5	8	3	3	6	111	0.000193322
		I509	3	3	3	4	3	5	1	7	3	16	9	11	10	17	16	111	0.000193322
		E101	2	6	3	6	8	4	8	10	12	6	11	8	8	9	10	111	0.000193322
		C20	5	3	9	6	5	6	8	4	9	4	5	12	13	12	7	108	0.000188097
		I119	1	1	2	4	2	3	2	3	4	10	16	8	18	19	14	107	0.000186355
		J42	14	6	9	10	10	9	9	8	8	6	3	2	9	3	0	106	0.000184614
		C64	1	10	3	6	3	8	5	5	8	12	9	8	7	8	12	105	0.000182872
		K810	8	7	6	6	6	4	9	9	8	4	7	8	7	11	4	104	0.00018113
		W180	4	5	4	4	7	2	1	3	10	7	8	10	11	16	12	104	0.00018113
		B24	3	4	2	4	6	6	5	3	7	12	7	10	8	12	14	103	0.000179389
		K566	5	9	2	6	9	7	4	9	10	5	5	5	6	13	6	101	0.000175905
		I228	4	5	4	3	8	5	3	5	9	10	6	15	12	6	5	100	0.000174164
		B570	2	7	7	4	7	8	11	17	3	5	3	6	9	7	4	100	0.000174164
		E059	10	9	5	7	6	10	6	3	4	10	3	4	9	6	5	97	0.000168939
		W199	5	7	8	6	6	6	7	7	4	8	5	7	7	9	4	96	0.000167197
		I693	3	2	2	2	3	3	8	3	7	4	13	10	18	10	8	96	0.000167197
		C449	4	4	3	1	4	9	6	6	5	4	9	9	12	7	12	95	0.000165456
		E43	4	4	6	6	7	10	5	5	3	8	5	3	9	8	12	95	0.000165456
		C710	5	4	5	8	8	3	9	10	8	7	6	7	5	6	2	93	0.000161972
		K709	0	1	9	10	5	7	10	5	5	11	5	7	5	7	5	92	0.000160231
		F172	11	5	6	8	6	8	4	6	8	6	4	4	7	4	3	90	0.000156747
		N40	3	7	3	6	13	6	5	2	9	6	3	8	9	5	4	89	0.000155006
		E878	10	3	6	6	7	7	9	2	6	8	2	6	6	4	2	84	0.000146298
		C900	6	1	6	6	4	7	7	5	6	4	2	7	10	4	8	83	0.000144556
		I110	7	6	3	2	7	5	8	8	5	7	7	6	6	4	1	82	0.000142814
		J90	3	6	4	5	3	4	8	2	7	8	9	6	6	6	1	78	0.000135848
		K819	8	4	6	4	5	5	4	4	4	7	5	2	8	7	4	77	0.000134106
		C859	3	2	5	4	5	4	11	7	7	2	3	7	5	7	5	77	0.000134106
		F100	5	7	10	11	5	7	7	5	3	4	4	2	3	3	0	76	0.000132365
		A46	5	2	2	5	5	3	5	5	5	4	4	10	7	7	5	74	0.000128881
		J989	2	5	5	2	7	2	6	7	6	6	2	6	5	5	8	74	0.000128881
		I711	4	5	0	4	4	5	6	5	10	4	3	4	5	11	3	73	0.00012714
		I743	2	5	6	7	6	1	6	7	5	5	5	3	3	9	3	73	0.00012714
		I359	8	3	10	4	6	8	3	1	5	3	3	3	5	3	7	72	0.000125398
		I712	3	3	3	7	5	5	1	6	8	5	6	4	4	10	1	71	0.000123656
		E139	0	0	0	5	3	9	12	8	11	7	5	3	4	2	2	71	0.000123656
		I319	6	4	8	3	4	4	5	8	7	5	6	3	3	2	2	70	0.000121915
		Y838	3	2	3	2	5	4	2	5	7	8	1	6	12	5	4	69	0.000120173
		I080	1	6	3	6	6	7	3	8	2	6	2	5	8	2	4	69	0.000120173
		M069	6	5	4	4	6	4	4	2	3	6	4	2	9	5	3	67	0.00011669
		B573	2	6	4	4	5	2	6	5	4	5	5	6	5	4	4	67	0.00011669
		I221	5	3	3	6	2	2	6	5	6	10	3	4	5	2	4	66	0.000114948
		I050	2	6	9	6	8	6	6	3	2	4	3	4	3	3	0	65	0.000113206
		M319	5	5	7	4	11	2	7	6	5	2	1	3	1	1	4	64	0.000111465
		N180	4	2	3	1	1	0	3	5	2	3	6	4	10	8	11	63	0.000109723
		I679	3	5	1	7	4	5	3	8	3	5	6	1	7	2	3	63	0.000109723
		N289	2	7	2	6	4	5	7	3	3	8	2	4	4	1	5	63	0.000109723
		C719	1	3	5	7	5	6	3	1	2	5	1	2	10	3	8	62	0.000107982
		F101	0	3	1	3	2	6	2	7	3	1	6	5	7	11	5	62	0.000107982
		I771	5	3	5	3	2	3	4	11	6	4	3	4	3	2	3	61	0.00010624
		Q210	0	10	4	1	1	3	7	5	2	2	4	3	7	5	6	60	0.000104498
		E106	6	2	1	4	3	4	2	4	6	5	5	3	7	3	4	59	0.000102757
		I358	5	2	5	6	3	3	4	3	3	5	8	2	5	2	3	59	0.000102757
		W010	2	2	4	0	4	2	1	6	2	5	3	6	12	5	3	57	9.92734e-05
		K802	6	5	3	2	4	3	2	4	6	8	5	3	4	0	1	56	9.75318e-05
		F03	2	3	6	4	6	2	3	4	2	4	3	2	2	5	7	55	9.57901e-05
		C56	1	1	0	3	5	7	4	5	5	4	2	2	9	4	3	55	9.57901e-05
		E144	4	3	2	0	5	9	5	3	3	3	4	7	1	2	3	54	9.40485e-05
		I208	4	5	9	6	3	4	0	4	4	2	2	3	1	4	2	53	9.23068e-05
		D509	3	3	2	2	2	1	3	1	0	5	0	14	7	3	7	53	9.23068e-05
		G301	2	1	3	2	2	0	5	7	4	3	1	3	4	4	12	53	9.23068e-05
		K570	1	1	7	3	5	2	1	2	4	6	4	3	8	4	2	53	9.23068e-05
		C760	5	2	2	5	3	2	3	2	2	4	3	5	7	5	2	52	9.05652e-05
		J40	4	7	3	4	4	5	2	8	5	5	1	1	3	0	0	52	9.05652e-05
		E162	2	4	0	2	4	6	1	9	3	2	3	6	5	2	3	52	9.05652e-05
		I671	2	4	4	4	4	3	3	6	1	6	4	2	5	3	1	52	9.05652e-05
		K579	1	2	1	4	3	3	4	4	3	4	4	4	8	4	3	52	9.05652e-05
		C920	1	1	5	3	3	1	4	2	4	6	6	2	6	5	3	52	9.05652e-05
		J46	7	3	2	6	6	2	1	8	1	1	1	4	5	1	3	51	8.88236e-05
		C55	6	1	3	3	4	5	3	3	8	4	2	2	2	3	0	49	8.53403e-05
		I260	6	0	2	0	6	5	5	4	1	3	5	4	1	6	1	49	8.53403e-05
		K85	15	18	15	0	0	0	0	0	0	0	0	0	0	0	0	48	8.35986e-05
		W190	8	6	3	4	1	0	3	3	1	2	4	2	4	4	3	48	8.35986e-05
		G931	2	6	4	4	1	7	4	4	2	2	2	1	5	2	2	48	8.35986e-05
		I330	2	2	3	3	1	4	4	5	3	3	4	4	2	4	3	47	8.1857e-05
		A90	1	0	4	1	5	1	2	5	1	2	11	0	2	9	3	47	8.1857e-05
		N12	0	3	2	1	4	5	5	4	5	1	4	2	6	2	3	47	8.1857e-05
		K850	0	0	0	1	3	4	2	4	6	5	3	8	3	6	2	47	8.1857e-05
		I674	4	1	5	2	3	6	4	2	3	1	3	6	2	3	1	46	8.01154e-05
		D689	3	2	3	7	2	2	1	3	3	7	3	2	3	0	4	45	7.83737e-05
		K700	1	0	3	4	5	3	0	1	5	1	3	1	3	9	6	45	7.83737e-05
		K760	1	3	5	4	3	3	5	3	4	4	0	2	1	6	1	45	7.83737e-05
		J961	1	4	2	3	2	3	3	6	4	1	1	2	7	3	3	45	7.83737e-05
		J985	2	6	8	10	6	0	0	0	2	0	4	2	0	1	3	44	7.66321e-05
		D539	1	3	3	1	8	1	3	3	5	2	5	4	1	2	2	44	7.66321e-05
		E784	0	0	1	1	1	0	1	2	1	5	9	14	3	2	4	44	7.66321e-05
		G405	4	2	9	6	3	4	0	1	1	1	2	4	0	2	3	42	7.31488e-05
		I424	2	0	2	4	1	3	4	1	4	3	1	2	9	4	2	42	7.31488e-05
		A309	1	5	1	5	4	5	1	3	2	1	3	4	1	3	3	42	7.31488e-05
		C959	0	2	2	2	2	3	5	2	3	2	2	7	2	4	4	42	7.31488e-05
		R092	0	0	0	1	6	3	1	4	3	2	1	2	17	0	2	42	7.31488e-05
		K701	3	1	2	1	0	3	5	4	2	3	5	2	2	6	2	41	7.14072e-05
		F106	1	5	4	6	3	5	4	4	4	3	1	1	0	0	0	41	7.14072e-05
		C220	4	1	0	1	5	4	2	0	3	7	3	5	4	0	1	40	6.96655e-05
		C069	4	4	3	2	1	3	4	4	2	3	2	1	4	2	1	40	6.96655e-05
		J188	1	0	1	3	2	4	0	4	4	3	7	3	5	2	1	40	6.96655e-05
		J158	1	3	0	1	0	0	0	2	1	2	3	3	8	7	9	40	6.96655e-05
		Q909	0	1	0	6	1	3	7	1	5	3	4	4	1	2	2	40	6.96655e-05
		G122	0	1	0	4	1	1	6	3	4	4	5	3	3	1	4	40	6.96655e-05
		E126	1	1	1	1	4	6	2	2	2	2	4	2	3	5	3	39	6.79239e-05
		C19	1	2	3	2	3	1	2	2	3	5	3	5	5	2	0	39	6.79239e-05
		Y832	6	4	1	2	6	6	2	1	3	1	1	2	1	1	1	38	6.61823e-05
		I803	4	3	1	7	0	5	2	1	1	1	7	2	3	1	0	38	6.61823e-05
		E138	2	0	2	3	3	3	3	3	3	3	3	1	5	3	1	38	6.61823e-05
		J181	1	6	1	2	1	8	3	0	2	2	3	1	2	4	2	38	6.61823e-05
		D469	1	5	0	3	3	0	8	2	3	2	1	4	3	0	3	38	6.61823e-05
		C73	1	1	1	1	2	1	1	5	5	1	4	5	4	5	1	38	6.61823e-05
		K830	3	1	4	3	1	1	2	2	3	1	3	4	3	4	2	37	6.44406e-05
		E781	1	1	1	4	2	0	2	3	3	5	3	2	5	3	2	37	6.44406e-05
		I500	1	2	1	3	3	3	2	2	6	2	2	3	1	2	4	37	6.44406e-05
		I089	0	5	1	0	1	3	4	1	1	2	2	3	6	2	6	37	6.44406e-05
		I200	0	2	2	4	3	1	2	2	7	1	3	0	3	5	2	37	6.44406e-05
		X599	5	3	5	1	1	2	2	2	0	4	2	3	1	3	2	36	6.2699e-05
		I872	2	7	0	1	0	0	2	2	2	4	6	2	0	3	4	35	6.09573e-05
		F192	0	0	0	0	1	5	2	1	5	2	4	3	5	5	2	35	6.09573e-05
		C762	4	3	1	3	3	6	1	3	2	1	1	2	2	2	0	34	5.92157e-05
		C140	1	1	2	3	3	3	1	1	2	1	2	5	1	5	3	34	5.92157e-05
		E872	0	0	4	1	0	1	5	3	1	5	4	2	2	4	2	34	5.92157e-05
		G35	2	1	3	1	2	2	4	1	4	3	2	2	3	3	0	33	5.74741e-05
		I638	0	1	0	0	0	0	0	0	0	2	0	5	3	11	11	33	5.74741e-05
		A418	0	1	2	0	2	1	0	2	1	3	0	6	4	7	3	32	5.57324e-05
		X429	0	1	0	0	4	0	2	2	1	2	5	4	3	5	3	32	5.57324e-05
		J969	4	0	0	1	0	1	0	1	2	3	4	4	2	4	5	31	5.39908e-05
		I201	2	1	1	1	1	5	2	2	3	4	1	2	1	4	1	31	5.39908e-05
		B182	1	2	1	1	2	2	1	3	2	2	2	4	3	2	3	31	5.39908e-05
		I709	1	0	0	0	2	1	0	0	2	4	5	2	5	6	3	31	5.39908e-05
		J681	0	2	0	3	3	4	0	2	2	5	3	4	0	3	0	31	5.39908e-05
		V892	0	1	0	4	5	1	4	1	2	1	4	2	2	1	3	31	5.39908e-05
		W019	0	0	2	0	1	2	0	3	2	3	3	4	7	2	2	31	5.39908e-05
		I019	3	4	0	2	1	0	2	3	2	0	3	3	2	3	2	30	5.22492e-05
		I058	1	2	1	0	1	0	3	0	1	3	2	3	5	3	5	30	5.22492e-05
		L89	2	1	2	2	2	3	1	0	0	4	1	2	4	4	1	29	5.05075e-05
		K409	2	0	2	2	3	4	4	4	1	2	1	0	2	2	0	29	5.05075e-05
		C798	2	2	2	2	2	2	2	4	1	1	0	2	3	2	2	29	5.05075e-05
		K254	2	0	7	2	3	1	1	1	1	1	1	3	2	3	1	29	5.05075e-05
		C250	2	0	1	0	1	0	2	2	2	3	3	3	0	7	3	29	5.05075e-05
		Q248	1	1	2	6	2	3	0	3	0	2	2	2	3	2	0	29	5.05075e-05
		D571	1	1	0	3	0	2	3	3	2	1	2	5	4	2	0	29	5.05075e-05
		C439	0	0	4	1	1	2	2	3	2	3	2	4	2	1	2	29	5.05075e-05
		K297	3	0	4	2	0	1	2	2	1	4	3	1	1	1	3	28	4.87659e-05
		J22	2	2	1	4	2	2	4	1	0	0	1	2	1	2	3	27	4.70242e-05
		K659	2	3	3	0	2	3	3	2	2	1	1	2	1	2	0	27	4.70242e-05
		B575	2	4	1	3	2	3	0	3	3	2	2	1	0	1	0	27	4.70242e-05
		K259	2	2	2	1	2	3	1	4	1	1	2	0	1	3	2	27	4.70242e-05
		I691	1	0	2	3	3	0	2	3	1	3	2	1	4	1	1	27	4.70242e-05
		I099	1	4	1	2	0	1	5	0	3	3	1	1	1	3	1	27	4.70242e-05
		G311	1	1	0	0	2	1	0	2	2	1	1	2	2	7	5	27	4.70242e-05
		I313	0	2	0	2	0	1	3	1	2	3	2	1	5	3	2	27	4.70242e-05
		W698	6	0	2	1	3	2	3	1	1	0	4	0	0	2	1	26	4.52826e-05
		W870	1	0	3	3	1	0	1	5	2	2	2	2	2	1	1	26	4.52826e-05
		M199	1	1	4	0	3	3	1	4	1	2	3	0	2	0	1	26	4.52826e-05
		J849	1	1	1	2	0	0	3	0	2	1	1	3	2	5	4	26	4.52826e-05
		N10	0	3	4	0	2	3	1	1	3	0	3	0	2	2	2	26	4.52826e-05
		O994	0	2	1	2	1	0	3	2	4	1	3	3	2	1	1	26	4.52826e-05
		W879	0	0	1	2	3	0	1	1	4	3	2	1	1	4	3	26	4.52826e-05
		A169	3	1	3	2	1	1	2	4	1	2	0	1	2	1	1	25	4.3541e-05
		I349	2	0	2	1	1	2	3	0	2	4	2	0	0	4	2	25	4.3541e-05
		N188	2	0	2	0	0	1	1	2	3	0	3	3	1	4	3	25	4.3541e-05
		M318	2	3	1	3	3	3	1	0	2	3	0	2	1	0	1	25	4.3541e-05
		E136	1	0	1	0	0	1	1	0	0	0	1	6	13	1	0	25	4.3541e-05
		I271	1	1	3	2	2	0	3	4	3	0	2	2	2	0	0	25	4.3541e-05
		F103	1	2	1	3	1	4	2	4	1	0	1	1	1	1	2	25	4.3541e-05
		J47	1	0	6	3	1	3	2	3	0	2	0	0	1	1	2	25	4.3541e-05
		C240	0	0	3	4	2	2	0	6	2	3	0	0	1	1	1	25	4.3541e-05
		E114	1	0	2	1	1	0	3	4	0	2	1	2	4	1	2	24	4.17993e-05
		N200	1	1	2	0	1	1	3	2	2	3	3	1	2	1	1	24	4.17993e-05
		I083	1	0	0	2	0	1	1	1	1	0	1	0	8	7	1	24	4.17993e-05
		E756	1	0	1	2	0	0	2	3	1	2	3	2	5	1	1	24	4.17993e-05
		A91	0	1	3	0	2	3	1	0	2	3	3	1	0	3	2	24	4.17993e-05
		J80	5	0	1	0	2	1	1	1	0	1	2	2	1	2	4	23	4.00577e-05
		C780	3	1	0	1	3	2	2	3	1	1	1	1	1	2	1	23	4.00577e-05
		D619	1	1	2	2	0	0	3	2	1	2	2	2	4	0	1	23	4.00577e-05
		I051	1	0	3	0	1	2	2	1	2	0	3	2	2	4	0	23	4.00577e-05
		C029	1	0	1	0	1	1	2	3	3	0	1	4	1	3	2	23	4.00577e-05
		I81	0	1	1	3	0	2	2	2	0	2	1	1	3	3	2	23	4.00577e-05
		B207	0	0	1	0	1	0	3	1	1	2	4	4	2	3	1	23	4.00577e-05
		F322	3	0	1	0	1	0	3	2	1	3	0	0	4	2	2	22	3.8316e-05
		C269	3	1	1	0	1	4	3	3	2	3	0	1	0	0	0	22	3.8316e-05
		B208	1	1	2	1	3	0	3	1	1	2	0	2	3	1	1	22	3.8316e-05
		A150	1	0	2	1	0	1	1	1	0	1	1	3	4	1	5	22	3.8316e-05
		K800	1	0	1	2	1	6	1	1	2	2	1	1	3	0	0	22	3.8316e-05
		C419	1	0	2	1	0	4	3	4	0	2	2	2	1	0	0	22	3.8316e-05
		I744	1	2	0	1	0	3	1	4	1	0	3	2	1	2	1	22	3.8316e-05
		Y836	0	2	2	2	0	2	2	2	2	1	0	3	0	3	1	22	3.8316e-05
		K460	0	0	2	2	1	2	0	1	1	3	1	0	0	7	2	22	3.8316e-05
		C23	2	0	1	1	2	1	1	1	1	2	1	1	2	3	2	21	3.65744e-05
		J980	2	2	1	0	0	1	1	4	0	4	0	3	1	2	0	21	3.65744e-05
		C187	2	2	3	0	1	2	2	1	0	4	0	0	0	1	3	21	3.65744e-05
		K403	2	0	0	0	2	1	1	1	1	2	2	2	1	2	4	21	3.65744e-05
		C911	1	0	1	2	0	4	1	2	1	2	1	0	3	2	1	21	3.65744e-05
		K578	1	1	2	2	1	2	1	1	1	2	2	3	0	1	1	21	3.65744e-05
		W849	1	0	1	2	0	1	1	0	2	1	3	3	2	3	1	21	3.65744e-05
		I716	0	1	1	3	3	3	1	1	0	1	0	1	2	2	2	21	3.65744e-05
		C109	0	0	1	2	2	4	0	0	3	3	1	1	4	0	0	21	3.65744e-05
		M349	0	0	0	0	2	2	2	1	3	1	0	1	1	5	3	21	3.65744e-05
		I272	0	0	0	0	0	1	2	0	2	1	2	3	5	2	3	21	3.65744e-05
		V299	2	0	1	1	0	1	1	3	4	0	2	1	3	0	1	20	3.48328e-05
		I950	2	0	0	2	1	1	2	1	0	2	0	2	3	4	0	20	3.48328e-05
		G319	1	0	1	1	1	1	1	0	0	0	3	3	2	4	2	20	3.48328e-05
		I519	0	0	0	0	1	0	0	2	0	2	1	2	7	1	4	20	3.48328e-05
		K562	2	0	0	1	2	1	2	0	0	1	2	2	3	2	1	19	3.30911e-05
		G919	1	0	0	2	1	0	0	2	2	2	3	2	1	0	3	19	3.30911e-05
		C788	1	1	1	1	3	0	3	1	3	0	1	1	0	2	1	19	3.30911e-05
		F209	1	1	1	0	3	2	1	1	2	1	0	0	2	4	0	19	3.30911e-05
		K805	1	1	2	1	2	4	2	0	0	0	0	1	1	4	0	19	3.30911e-05
		E113	1	0	0	0	0	1	0	1	0	1	0	4	4	2	5	19	3.30911e-05
		C179	0	2	0	1	1	0	0	2	2	3	3	1	2	1	1	19	3.30911e-05
		A049	0	1	0	0	2	2	0	2	0	1	0	1	3	1	6	19	3.30911e-05
		C170	0	1	2	3	1	0	1	2	0	2	1	1	2	1	2	19	3.30911e-05
		J129	0	1	1	2	0	0	0	1	1	0	3	1	0	1	8	19	3.30911e-05
		L089	0	0	0	1	0	0	2	0	0	0	7	2	2	3	2	19	3.30911e-05
		I620	0	0	0	1	2	1	0	1	3	0	2	3	4	2	0	19	3.30911e-05
		K359	3	0	1	2	1	1	0	2	1	1	0	0	2	3	1	18	3.13495e-05
		M819	3	1	1	0	2	2	3	3	0	1	0	2	0	0	0	18	3.13495e-05
		Q253	2	0	0	2	1	1	2	3	2	0	1	0	0	2	2	18	3.13495e-05
		F104	1	1	1	2	1	4	0	3	0	1	1	0	2	0	1	18	3.13495e-05
		D648	1	0	2	1	1	1	0	3	0	3	0	2	2	1	1	18	3.13495e-05
		I409	1	2	0	1	0	2	2	1	1	0	0	3	0	4	1	18	3.13495e-05
		E440	1	2	0	0	0	0	0	0	3	0	0	2	5	2	3	18	3.13495e-05
		K721	1	1	1	0	0	1	1	2	1	3	2	1	1	2	1	18	3.13495e-05
		G710	1	0	0	1	0	1	1	3	3	1	3	0	2	0	2	18	3.13495e-05
		C921	0	3	2	2	0	3	1	0	1	0	1	1	2	0	2	18	3.13495e-05
		I738	0	0	1	0	0	1	0	0	1	1	1	3	4	6	0	18	3.13495e-05
		D683	0	0	0	0	0	4	1	1	3	1	1	2	3	1	1	18	3.13495e-05
		K851	0	0	0	0	0	1	0	2	6	2	1	1	0	4	1	18	3.13495e-05
		K290	2	1	1	2	1	0	3	1	1	3	1	0	0	1	0	17	2.96079e-05
		K469	2	1	2	1	2	2	0	1	1	1	1	0	1	2	0	17	2.96079e-05
		K279	1	2	3	0	0	4	1	0	1	1	0	0	0	3	1	17	2.96079e-05
		I00	1	0	1	2	2	1	1	1	1	1	3	0	1	0	2	17	2.96079e-05
		I513	1	1	3	1	2	0	1	1	0	1	1	2	1	1	1	17	2.96079e-05
		G459	0	1	0	2	4	2	2	0	1	0	1	0	1	3	0	17	2.96079e-05
		I499	0	0	0	0	0	3	0	1	3	1	2	1	1	1	4	17	2.96079e-05
		B948	0	0	0	0	0	1	4	1	0	1	1	2	1	3	3	17	2.96079e-05
		K250	0	0	0	0	0	0	1	3	1	0	2	2	4	3	1	17	2.96079e-05
		J869	5	1	3	2	1	0	0	1	0	0	0	0	1	0	2	16	2.78662e-05
		C787	3	0	2	1	1	0	2	1	0	0	0	1	1	3	1	16	2.78662e-05
		I629	2	3	0	0	1	1	0	3	1	0	0	2	1	2	0	16	2.78662e-05
		I423	2	5	0	3	1	0	1	1	2	0	1	0	0	0	0	16	2.78662e-05
		I778	1	0	0	3	1	1	3	2	0	1	1	1	1	1	0	16	2.78662e-05
		F329	1	0	0	2	2	1	0	1	0	4	2	0	1	1	1	16	2.78662e-05
		I510	1	1	0	0	0	1	3	2	2	1	0	0	0	4	1	16	2.78662e-05
		V499	1	2	1	0	2	1	0	0	2	0	3	1	0	2	1	16	2.78662e-05
		I715	1	2	0	0	0	0	1	1	1	3	1	0	2	1	3	16	2.78662e-05
		Y839	0	3	1	0	1	3	0	1	2	0	1	0	2	2	0	16	2.78662e-05
		K251	0	3	1	1	2	2	1	0	0	0	2	1	0	1	2	16	2.78662e-05
		I741	0	3	2	0	1	2	1	2	1	1	1	1	1	0	0	16	2.78662e-05
		B571	0	2	0	1	0	4	1	2	1	1	0	2	1	1	0	16	2.78662e-05
		K529	0	2	0	1	3	1	0	0	1	2	0	1	1	3	1	16	2.78662e-05
		C249	0	1	1	0	1	1	1	1	2	0	2	1	3	2	0	16	2.78662e-05
		I830	0	1	0	1	1	1	2	1	1	1	1	2	3	1	0	16	2.78662e-05
		F199	0	1	0	1	0	0	1	1	0	0	1	2	0	6	3	16	2.78662e-05
		I241	0	1	0	0	2	0	0	2	0	1	0	0	0	2	8	16	2.78662e-05
		C541	0	1	1	0	0	2	2	0	1	2	1	3	2	1	0	16	2.78662e-05
		I071	0	0	1	1	0	1	0	0	3	1	2	1	2	4	0	16	2.78662e-05
		F142	0	0	0	0	2	0	0	0	2	3	2	2	3	1	1	16	2.78662e-05
		K852	0	0	0	0	1	2	1	2	3	3	1	1	0	1	1	16	2.78662e-05
		I632	0	0	0	0	0	3	0	0	0	1	0	0	1	5	6	16	2.78662e-05
		K858	0	0	0	0	0	1	2	0	0	0	2	1	2	3	5	16	2.78662e-05
		B909	2	1	1	3	0	3	1	2	0	1	1	0	0	0	0	15	2.61246e-05
		K767	2	1	0	1	0	0	0	1	0	3	0	3	1	1	2	15	2.61246e-05
		N170	1	0	2	1	1	0	1	3	0	2	2	1	0	0	1	15	2.61246e-05
		B92	1	0	1	3	1	2	1	2	0	0	0	0	3	1	0	15	2.61246e-05
		C383	1	1	0	1	0	1	1	2	1	2	1	0	0	1	3	15	2.61246e-05
		G934	1	4	0	0	1	0	0	3	1	0	1	1	0	2	1	15	2.61246e-05
		I748	1	1	0	0	0	0	1	1	0	0	3	0	3	2	3	15	2.61246e-05
		B349	1	1	0	0	2	0	1	0	0	3	4	1	0	0	2	15	2.61246e-05
		I278	0	2	2	3	1	0	1	0	1	2	0	2	0	0	1	15	2.61246e-05
		K801	0	2	1	2	1	1	0	0	2	0	1	3	0	1	1	15	2.61246e-05
		E104	0	0	2	0	1	1	0	2	1	0	3	1	0	0	4	15	2.61246e-05
		C01	0	0	2	1	0	0	1	1	0	2	2	1	2	2	1	15	2.61246e-05
		Q208	0	0	0	1	1	3	1	2	1	3	0	1	1	1	0	15	2.61246e-05
		E870	0	0	0	1	0	1	2	0	2	1	0	1	2	4	1	15	2.61246e-05
		C412	0	0	0	1	1	1	1	0	2	0	1	3	2	2	1	15	2.61246e-05
		E888	0	0	0	0	1	0	0	0	0	3	0	3	4	1	3	15	2.61246e-05
		J09	0	0	0	0	0	0	1	1	0	0	4	0	4	3	2	15	2.61246e-05
		A920	0	0	0	0	0	0	0	0	0	0	7	7	0	1	0	15	2.61246e-05
		K275	3	0	0	3	1	1	1	1	1	1	0	1	1	0	0	14	2.43829e-05
		K274	3	2	0	1	0	1	1	1	2	1	0	0	0	1	1	14	2.43829e-05
		K861	2	0	1	1	2	1	0	1	2	1	0	1	0	2	0	14	2.43829e-05
		I839	2	0	0	1	1	1	1	1	1	2	1	2	0	0	1	14	2.43829e-05
		I731	1	1	2	2	0	0	0	2	2	1	0	0	1	2	0	14	2.43829e-05
		E786	1	1	0	1	0	2	2	2	1	2	1	0	1	0	0	14	2.43829e-05
		K750	1	2	1	0	1	0	0	2	0	2	0	1	1	3	0	14	2.43829e-05
		K860	1	0	1	1	2	2	2	0	0	0	2	1	0	0	2	14	2.43829e-05
		E875	1	0	1	1	1	0	0	1	0	1	1	2	0	3	2	14	2.43829e-05
		I618	1	1	0	0	1	0	0	2	0	2	2	4	0	0	1	14	2.43829e-05
		E143	1	1	1	2	1	0	2	0	2	1	0	0	0	2	1	14	2.43829e-05
		D696	1	1	0	0	0	1	0	1	1	2	2	0	1	3	1	14	2.43829e-05
		E232	0	4	2	0	0	0	2	1	0	1	1	1	1	0	1	14	2.43829e-05
		G939	0	2	3	1	1	2	0	1	0	1	0	0	1	1	1	14	2.43829e-05
		V093	0	1	1	2	1	0	1	4	0	1	0	1	0	1	1	14	2.43829e-05
		I052	0	1	1	0	2	1	1	2	1	0	1	2	0	2	0	14	2.43829e-05
		Y834	0	1	0	1	1	2	1	3	0	0	3	2	0	0	0	14	2.43829e-05
		Q211	0	0	3	0	0	1	0	0	0	0	1	2	2	2	3	14	2.43829e-05
		A483	0	0	1	0	0	0	1	1	0	2	1	0	3	4	1	14	2.43829e-05
		K929	0	0	0	2	0	0	1	1	1	1	3	0	1	1	3	14	2.43829e-05
		J110	0	0	0	2	1	0	1	1	0	0	1	2	3	2	1	14	2.43829e-05
		K292	3	1	1	2	1	1	2	0	0	0	1	0	0	1	0	13	2.26413e-05
		I749	2	0	0	1	1	0	1	0	2	2	1	1	1	1	0	13	2.26413e-05
		E874	2	0	0	0	1	0	0	3	0	1	3	0	3	0	0	13	2.26413e-05
		J111	1	0	1	0	0	0	0	0	0	4	1	1	1	1	3	13	2.26413e-05
		I339	1	0	0	0	1	0	0	2	0	0	1	2	3	1	2	13	2.26413e-05
		J450	1	1	2	1	2	1	0	3	0	0	1	0	1	0	0	13	2.26413e-05
		C910	1	0	1	0	2	0	0	1	1	2	1	3	1	0	0	13	2.26413e-05
		I341	1	0	1	1	1	0	2	0	0	0	1	2	2	1	1	13	2.26413e-05
		E778	1	1	1	1	1	6	0	0	0	0	2	0	0	0	0	13	2.26413e-05
		I425	1	1	0	1	1	0	0	1	1	4	0	0	2	0	1	13	2.26413e-05
		C609	0	3	1	0	1	2	1	1	1	0	1	1	0	1	0	13	2.26413e-05
		E41	0	2	1	0	1	0	3	1	2	1	1	0	0	0	1	13	2.26413e-05
		G809	0	1	2	0	2	0	0	0	1	1	0	0	1	3	2	13	2.26413e-05
		N399	0	1	0	0	2	0	0	0	1	3	2	1	1	2	0	13	2.26413e-05
		I062	0	1	0	0	1	1	0	1	0	3	1	2	1	1	1	13	2.26413e-05
		N119	0	0	2	0	0	1	0	2	1	1	2	0	3	1	0	13	2.26413e-05
		I092	0	0	2	1	0	2	1	0	1	2	0	0	3	1	0	13	2.26413e-05
		K350	0	0	1	1	1	2	1	1	1	1	1	2	0	1	0	13	2.26413e-05
		A499	0	0	0	1	0	0	1	0	2	1	2	1	1	3	1	13	2.26413e-05
		M623	0	0	0	0	0	2	0	0	0	0	4	0	3	2	2	13	2.26413e-05
		X590	0	0	0	0	0	0	0	3	2	1	4	0	0	1	2	13	2.26413e-05
		J64	3	0	1	1	0	2	1	0	0	1	1	2	0	0	0	12	2.08997e-05
		K804	2	1	0	0	1	2	0	1	1	1	1	1	1	0	0	12	2.08997e-05
		I832	1	1	0	0	0	2	1	0	0	2	1	3	0	1	0	12	2.08997e-05
		I634	1	1	1	3	0	0	0	3	1	0	0	0	0	1	1	12	2.08997e-05
		O96	1	0	0	0	0	1	1	1	0	3	1	0	0	3	1	12	2.08997e-05
		W060	1	1	0	0	0	0	3	0	0	2	3	0	0	1	1	12	2.08997e-05
		I069	1	1	0	1	0	1	3	1	2	1	0	0	1	0	0	12	2.08997e-05
		J709	1	0	1	2	1	0	1	0	1	1	3	0	1	0	0	12	2.08997e-05
		I724	1	1	1	0	0	1	1	1	0	0	3	1	0	2	0	12	2.08997e-05
		K319	1	0	2	0	1	1	1	1	2	0	1	0	1	0	1	12	2.08997e-05
		Y199	1	1	0	0	1	0	0	1	2	0	1	1	0	1	3	12	2.08997e-05
		K808	1	0	0	1	0	0	0	0	0	0	1	1	5	2	1	12	2.08997e-05
		N26	0	2	0	0	0	2	1	1	0	1	1	1	1	0	2	12	2.08997e-05
		E049	0	1	1	0	1	3	1	1	1	1	0	0	1	1	0	12	2.08997e-05
		I352	0	1	0	0	0	0	0	2	0	3	1	0	2	1	2	12	2.08997e-05
		E840	0	1	0	0	1	1	1	1	1	1	0	2	1	1	1	12	2.08997e-05
		C348	0	1	0	0	0	0	0	0	1	2	0	3	1	2	2	12	2.08997e-05
		X420	0	1	0	0	0	0	1	3	1	0	0	1	2	3	0	12	2.08997e-05
		C499	0	1	0	0	0	0	0	3	3	2	1	0	0	1	1	12	2.08997e-05
		K720	0	1	0	0	0	1	0	1	0	2	3	2	1	1	0	12	2.08997e-05
		J410	0	1	1	0	3	1	0	2	0	2	0	1	1	0	0	12	2.08997e-05
		M844	0	1	0	0	1	1	0	1	1	1	0	1	3	1	1	12	2.08997e-05
		D62	0	1	0	4	0	1	2	1	1	1	0	1	0	0	0	12	2.08997e-05
		X959	0	1	3	1	0	0	1	2	1	0	0	2	0	0	1	12	2.08997e-05
		K573	0	1	1	1	0	2	0	2	1	1	0	1	1	0	1	12	2.08997e-05
		I060	0	0	2	2	2	1	1	2	0	0	0	1	1	0	0	12	2.08997e-05
		G629	0	0	1	1	1	2	1	2	1	0	1	1	0	0	1	12	2.08997e-05
		F200	0	0	1	0	1	0	1	1	0	3	2	0	1	0	2	12	2.08997e-05
		I878	0	0	1	3	0	5	0	0	1	0	0	2	0	0	0	12	2.08997e-05
		A153	0	0	0	1	3	0	1	0	1	0	2	0	2	1	1	12	2.08997e-05
		E137	0	0	0	1	0	1	0	1	2	0	1	0	1	3	2	12	2.08997e-05
		X459	0	0	0	0	1	0	0	2	1	1	2	2	2	1	0	12	2.08997e-05
		J438	0	0	0	0	1	2	1	0	1	1	2	2	0	0	2	12	2.08997e-05
		N038	0	0	0	0	0	1	0	0	0	0	2	2	3	2	2	12	2.08997e-05
		C500	4	0	0	1	0	0	1	2	0	1	1	0	0	1	0	11	1.9158e-05
		D45	2	1	1	0	0	0	1	0	2	0	1	3	0	0	0	11	1.9158e-05
		K766	2	1	0	0	0	1	0	1	1	1	1	0	0	2	1	11	1.9158e-05
		D65	2	0	0	1	2	0	3	0	0	0	1	1	1	0	0	11	1.9158e-05
		K295	1	1	1	0	0	0	1	3	1	0	0	0	1	2	0	11	1.9158e-05
		K37	1	1	1	0	0	0	2	0	1	1	0	2	0	1	1	11	1.9158e-05
		C950	1	0	1	0	1	1	0	1	1	2	1	0	1	0	1	11	1.9158e-05
		I850	1	2	1	2	1	0	2	0	1	1	0	0	0	0	0	11	1.9158e-05
		D400	1	1	0	0	1	1	1	0	1	0	1	3	0	0	1	11	1.9158e-05
		C160	0	1	1	0	0	1	0	0	2	1	1	1	0	2	1	11	1.9158e-05
		N178	0	1	0	1	1	1	0	0	1	0	0	0	2	1	3	11	1.9158e-05
		G419	0	1	1	0	2	0	2	0	1	2	1	0	0	1	0	11	1.9158e-05
		E079	0	1	2	1	1	0	1	0	2	0	0	2	0	1	0	11	1.9158e-05
		K829	0	1	0	3	1	2	1	0	0	1	1	1	0	0	0	11	1.9158e-05
		J708	0	0	1	0	0	0	0	1	1	2	1	1	3	1	0	11	1.9158e-05
		N209	0	0	1	0	0	1	0	0	1	1	1	1	3	0	2	11	1.9158e-05
		G400	0	0	0	1	0	2	1	1	0	1	0	1	1	2	1	11	1.9158e-05
		M109	0	0	0	1	0	0	1	1	1	0	2	2	1	0	2	11	1.9158e-05
		I081	0	0	0	0	1	1	1	0	3	0	0	3	1	0	1	11	1.9158e-05
		E103	0	0	0	0	0	0	2	3	1	1	1	0	2	0	1	11	1.9158e-05
		A310	0	0	0	0	0	0	0	1	0	0	4	1	1	2	2	11	1.9158e-05
		O100	3	1	0	1	1	0	0	1	0	0	1	1	1	0	0	10	1.74164e-05
		B99	3	0	1	1	0	1	1	0	0	0	1	0	0	1	1	10	1.74164e-05
		F105	2	1	1	2	1	1	0	1	0	1	0	0	0	0	0	10	1.74164e-05
		K639	2	0	0	0	0	0	1	1	1	1	0	1	2	1	0	10	1.74164e-05
		C443	2	0	0	0	2	1	0	0	0	1	0	0	1	2	1	10	1.74164e-05
		M139	1	0	3	1	2	0	0	0	0	1	0	2	0	0	0	10	1.74164e-05
		K565	1	0	0	1	0	1	0	1	0	1	2	0	1	1	1	10	1.74164e-05
		N429	1	0	3	1	1	1	0	1	0	0	0	0	1	1	0	10	1.74164e-05
		B550	1	1	0	1	0	0	1	0	4	2	0	0	0	0	0	10	1.74164e-05
		B574	1	2	1	2	1	0	0	1	0	0	0	1	0	0	1	10	1.74164e-05
		J182	1	0	0	0	0	1	0	0	1	1	1	2	0	2	1	10	1.74164e-05
		N309	1	0	0	0	0	1	1	2	2	2	0	0	0	1	0	10	1.74164e-05
		B199	1	1	2	1	0	0	1	1	0	0	1	0	1	0	1	10	1.74164e-05
		K803	1	0	0	0	0	0	2	0	0	1	0	1	0	2	3	10	1.74164e-05
		K264	1	1	1	1	0	0	1	0	1	0	2	1	1	0	0	10	1.74164e-05
		C763	0	1	0	0	1	1	1	0	0	0	4	0	1	1	0	10	1.74164e-05
		C482	0	1	1	1	1	0	1	2	0	0	0	0	1	1	1	10	1.74164e-05
		V289	0	1	1	0	0	0	2	1	1	0	2	0	1	1	0	10	1.74164e-05
		K564	0	1	1	0	0	0	1	1	2	1	2	0	1	0	0	10	1.74164e-05
		C221	0	1	1	0	1	1	0	1	1	2	0	1	0	0	1	10	1.74164e-05
		F019	0	1	1	0	1	0	2	2	3	0	0	0	0	0	0	10	1.74164e-05
		C819	0	0	1	2	0	0	1	1	1	1	1	2	0	0	0	10	1.74164e-05
		B651	0	0	1	2	0	0	2	2	0	0	0	0	3	0	0	10	1.74164e-05
		Q256	0	0	1	0	1	2	1	1	1	0	1	1	1	0	0	10	1.74164e-05
		C729	0	0	0	1	0	0	0	1	0	2	1	3	0	1	1	10	1.74164e-05
		X640	0	0	0	0	0	1	0	1	1	1	1	2	2	0	1	10	1.74164e-05
		C508	0	0	0	0	0	0	1	0	0	1	0	5	1	1	1	10	1.74164e-05
		R960	0	0	0	0	0	0	0	0	0	1	1	1	2	2	3	10	1.74164e-05
		K650	2	0	2	0	0	0	1	0	1	2	0	0	0	1	0	9	1.56747e-05
		N288	2	0	0	0	2	0	0	0	1	0	1	1	0	2	0	9	1.56747e-05
		X954	1	0	0	2	0	1	1	1	0	0	1	1	1	0	0	9	1.56747e-05
		E129	1	0	0	0	0	1	0	0	3	0	0	1	2	1	0	9	1.56747e-05
		K559	1	0	0	0	1	1	1	0	1	0	0	1	1	2	0	9	1.56747e-05
		J939	1	1	1	1	1	0	0	0	1	0	2	1	0	0	0	9	1.56747e-05
		X999	0	3	0	0	0	1	0	0	0	0	1	1	2	1	0	9	1.56747e-05
		I348	0	2	0	1	0	0	1	0	0	2	0	0	0	3	0	9	1.56747e-05
		D759	0	2	0	0	0	0	1	2	0	0	0	0	2	1	1	9	1.56747e-05
		A35	0	2	0	2	0	1	0	0	1	1	0	2	0	0	0	9	1.56747e-05
		K30	0	1	0	0	0	2	1	1	3	1	0	0	0	0	0	9	1.56747e-05
		F430	0	1	0	0	1	0	1	2	0	1	0	2	0	0	1	9	1.56747e-05
		G403	0	1	1	0	1	1	0	2	0	0	0	1	2	0	0	9	1.56747e-05
		C480	0	1	1	0	1	1	0	0	2	0	0	1	2	0	0	9	1.56747e-05
		C320	0	1	0	0	0	3	2	0	0	0	1	1	0	1	0	9	1.56747e-05
		W179	0	1	0	0	0	0	0	0	0	0	2	0	4	2	0	9	1.56747e-05
		K631	0	0	3	1	0	0	1	1	0	0	0	1	0	2	0	9	1.56747e-05
		E876	0	0	1	1	0	0	0	1	0	2	0	3	0	1	0	9	1.56747e-05
		M314	0	0	1	0	1	1	0	1	0	0	0	3	0	1	1	9	1.56747e-05
		B227	0	0	1	3	1	0	0	0	1	2	1	0	0	0	0	9	1.56747e-05
		C340	0	0	1	1	0	0	1	0	1	2	1	0	0	1	1	9	1.56747e-05
		I361	0	0	1	0	2	1	0	1	0	2	1	0	0	0	1	9	1.56747e-05
		I958	0	0	0	2	0	1	1	1	1	0	1	1	1	0	0	9	1.56747e-05
		Y129	0	0	0	1	0	0	0	2	2	1	2	0	0	1	0	9	1.56747e-05
		J431	0	0	0	1	0	1	1	1	2	0	0	1	0	1	1	9	1.56747e-05
		E709	0	0	0	1	2	0	0	3	2	1	0	0	0	0	0	9	1.56747e-05
		D570	0	0	0	1	1	0	1	2	1	1	0	1	0	1	0	9	1.56747e-05
		K420	0	0	0	1	1	0	1	0	0	1	1	1	1	2	0	9	1.56747e-05
		D70	0	0	0	0	2	0	1	1	0	0	0	2	1	1	1	9	1.56747e-05
		I088	0	0	0	0	1	1	0	0	0	0	1	2	2	2	0	9	1.56747e-05
		C929	0	0	0	0	1	1	1	3	0	0	0	0	2	0	1	9	1.56747e-05
		X629	0	0	0	0	1	1	3	2	1	0	0	0	1	0	0	9	1.56747e-05
		X499	0	0	0	0	0	2	0	1	1	1	1	1	0	2	0	9	1.56747e-05
		C180	0	0	0	0	0	1	0	1	1	2	0	3	1	0	0	9	1.56747e-05
		I828	0	0	0	0	0	0	1	0	2	1	1	1	0	1	2	9	1.56747e-05
		E050	2	0	2	0	0	0	0	1	0	2	0	1	0	0	0	8	1.39331e-05
		Y883	2	1	0	0	0	2	0	1	1	0	0	0	0	1	0	8	1.39331e-05
		J398	2	1	0	2	1	0	1	0	0	0	1	0	0	0	0	8	1.39331e-05
		K572	2	0	0	0	1	0	1	0	0	1	0	1	1	1	0	8	1.39331e-05
		J219	2	0	0	0	0	1	0	1	1	1	0	2	0	0	0	8	1.39331e-05
		J069	1	0	1	0	1	0	0	1	0	0	1	2	0	0	1	8	1.39331e-05
		J628	1	0	0	1	0	1	0	1	1	0	0	0	1	0	2	8	1.39331e-05
		E880	1	0	0	1	0	0	1	0	0	2	1	0	1	1	0	8	1.39331e-05
		K509	1	0	0	1	1	0	1	0	0	0	1	1	2	0	0	8	1.39331e-05
		K818	1	0	0	1	0	1	1	0	2	0	0	1	1	0	0	8	1.39331e-05
		N049	1	0	0	0	0	0	1	0	3	0	0	0	1	1	1	8	1.39331e-05
		Q613	1	0	0	1	0	1	1	0	0	1	1	0	0	2	0	8	1.39331e-05
		B200	1	0	0	0	0	2	1	0	0	1	2	0	0	1	0	8	1.39331e-05
		G909	1	2	0	0	0	2	0	0	1	0	1	0	0	1	0	8	1.39331e-05
		I690	1	0	0	0	0	2	0	1	0	1	1	0	0	0	2	8	1.39331e-05
		B201	1	0	0	0	1	1	0	1	0	1	1	0	1	0	1	8	1.39331e-05
		V021	0	2	0	2	0	1	0	1	1	0	0	0	0	1	0	8	1.39331e-05
		C786	0	2	0	0	0	0	2	0	1	0	1	1	0	0	1	8	1.39331e-05
		F99	0	1	1	0	0	0	0	1	0	2	1	0	0	1	1	8	1.39331e-05
		M869	0	1	0	0	1	0	1	1	1	0	0	0	1	1	1	8	1.39331e-05
		G621	0	1	0	1	1	1	0	0	1	1	1	0	1	0	0	8	1.39331e-05
		Y159	0	1	0	0	0	0	1	1	1	1	1	1	0	0	1	8	1.39331e-05
		G312	0	1	0	0	0	2	1	0	0	1	0	0	3	0	0	8	1.39331e-05
		B169	0	1	0	1	1	1	0	1	1	1	1	0	0	0	0	8	1.39331e-05
		J840	0	1	0	0	0	1	0	0	0	2	0	0	2	0	2	8	1.39331e-05
		J852	0	1	1	0	0	0	0	2	0	1	0	1	0	1	1	8	1.39331e-05
		K255	0	1	1	1	0	0	0	1	0	1	0	0	0	1	2	8	1.39331e-05
		I312	0	0	2	3	1	0	0	0	0	1	0	0	1	0	0	8	1.39331e-05
		I091	0	0	2	0	1	0	0	0	0	0	2	2	0	1	0	8	1.39331e-05
		W184	0	0	1	0	0	0	1	1	0	0	2	1	1	1	0	8	1.39331e-05
		I809	0	0	1	2	2	1	0	0	0	0	0	0	1	1	0	8	1.39331e-05
		D075	0	0	1	0	1	0	2	1	1	1	0	1	0	0	0	8	1.39331e-05
		J458	0	0	1	0	1	0	0	2	0	0	1	0	1	1	1	8	1.39331e-05
		K219	0	0	1	0	1	0	0	1	0	0	0	1	2	0	2	8	1.39331e-05
		G09	0	0	1	0	1	2	0	1	1	2	0	0	0	0	0	8	1.39331e-05
		I517	0	0	0	2	0	0	1	1	0	0	0	0	1	1	2	8	1.39331e-05
		X990	0	0	0	2	1	1	0	1	1	1	0	0	0	1	0	8	1.39331e-05
		D599	0	0	0	1	1	0	0	1	1	1	0	1	1	1	0	8	1.39331e-05
		K449	0	0	0	1	0	0	2	0	1	2	1	1	0	0	0	8	1.39331e-05
		K296	0	0	0	1	1	0	1	2	0	0	0	1	1	0	1	8	1.39331e-05
		K439	0	0	0	1	1	1	1	2	1	0	0	0	1	0	0	8	1.39331e-05
		I728	0	0	0	1	0	0	0	0	1	0	0	2	4	0	0	8	1.39331e-05
		C716	0	0	0	0	2	1	0	1	1	1	1	0	0	0	1	8	1.39331e-05
		N419	0	0	0	0	1	0	0	2	1	2	1	0	1	0	0	8	1.39331e-05
		M809	0	0	0	0	0	1	0	0	0	4	2	0	0	0	1	8	1.39331e-05
		W789	0	0	0	0	0	0	1	0	0	1	1	2	2	1	0	8	1.39331e-05
		I090	0	0	0	0	0	0	0	0	5	0	0	2	0	0	1	8	1.39331e-05
		X424	0	0	0	0	0	0	0	0	2	1	1	3	0	0	1	8	1.39331e-05
		E441	0	0	0	0	0	0	0	0	0	1	0	2	3	1	1	8	1.39331e-05
		E662	2	0	0	0	0	0	0	0	0	0	0	1	0	1	3	7	1.21915e-05
		E131	2	0	0	1	0	1	0	1	1	1	0	0	0	0	0	7	1.21915e-05
		E127	2	0	0	0	1	1	0	0	0	1	1	1	0	0	0	7	1.21915e-05
		L97	1	0	1	0	0	0	0	1	0	0	1	0	1	1	1	7	1.21915e-05
		B029	1	0	0	1	1	0	0	1	1	0	0	0	2	0	0	7	1.21915e-05
		M169	1	0	0	0	0	0	0	0	1	0	2	0	1	1	1	7	1.21915e-05
		I289	1	0	1	0	0	2	0	0	2	0	0	1	0	0	0	7	1.21915e-05
		G930	1	0	0	0	0	0	0	0	0	2	0	0	2	1	1	7	1.21915e-05
		K768	1	1	0	0	0	0	0	0	1	1	1	1	1	0	0	7	1.21915e-05
		K291	1	0	0	0	0	1	1	0	0	0	1	0	1	1	1	7	1.21915e-05
		B659	1	1	1	0	0	1	0	0	0	1	0	0	1	0	1	7	1.21915e-05
		K739	1	1	0	1	1	0	1	0	0	1	0	0	0	1	0	7	1.21915e-05
		E854	1	0	1	0	0	0	0	0	0	0	1	0	1	2	1	7	1.21915e-05
		C519	1	0	0	0	0	0	0	1	1	1	1	0	1	0	1	7	1.21915e-05
		I729	1	0	0	2	1	0	0	0	1	0	0	0	2	0	0	7	1.21915e-05
		M311	1	0	0	0	0	0	2	0	0	1	0	0	0	2	1	7	1.21915e-05
		N059	1	1	1	0	0	2	0	1	0	0	0	1	0	0	0	7	1.21915e-05
		E835	0	2	1	0	1	0	1	0	0	0	0	1	1	0	0	7	1.21915e-05
		K270	0	2	0	0	0	0	0	1	1	0	0	0	2	0	1	7	1.21915e-05
		E790	0	2	0	0	0	0	0	0	1	1	1	0	0	2	0	7	1.21915e-05
		C951	0	2	0	1	1	1	0	0	0	2	0	0	0	0	0	7	1.21915e-05
		Q251	0	1	1	0	0	0	0	0	0	0	2	0	3	0	0	7	1.21915e-05
		J168	0	1	0	0	0	0	0	0	0	0	3	2	0	1	0	7	1.21915e-05
		K590	0	1	2	1	0	0	2	0	0	0	1	0	0	0	0	7	1.21915e-05
		K299	0	1	2	0	0	1	0	0	1	0	0	0	0	1	1	7	1.21915e-05
		C549	0	1	0	0	0	0	1	1	1	2	0	0	0	1	0	7	1.21915e-05
		N111	0	1	0	0	0	0	1	0	0	1	0	1	1	0	2	7	1.21915e-05
		I309	0	1	1	1	0	1	1	0	0	0	1	0	0	1	0	7	1.21915e-05
		I48	0	1	0	0	1	1	0	0	1	0	0	1	0	0	2	7	1.21915e-05
		I342	0	1	0	0	0	0	1	0	1	0	0	0	0	3	1	7	1.21915e-05
		C148	0	1	0	0	2	1	0	1	1	0	1	0	0	0	0	7	1.21915e-05
		K593	0	0	2	0	0	0	1	2	0	0	0	0	1	1	0	7	1.21915e-05
		E249	0	0	2	0	1	0	1	0	1	0	0	0	0	1	1	7	1.21915e-05
		J384	0	0	1	0	1	2	2	1	0	0	0	0	0	0	0	7	1.21915e-05
		C139	0	0	1	0	0	0	0	1	2	0	0	0	0	1	2	7	1.21915e-05
		I301	0	0	1	0	1	0	1	0	1	0	1	0	1	0	1	7	1.21915e-05
		E725	0	0	1	1	1	0	1	0	1	0	0	1	0	0	1	7	1.21915e-05
		J82	0	0	1	0	3	0	1	0	0	1	0	0	0	1	0	7	1.21915e-05
		Y299	0	0	1	0	0	0	0	0	0	0	1	0	1	2	2	7	1.21915e-05
		W790	0	0	1	1	1	0	0	0	3	0	0	0	0	0	1	7	1.21915e-05
		I120	0	0	1	0	0	0	2	1	1	0	0	0	2	0	0	7	1.21915e-05
		I288	0	0	0	2	2	0	0	1	0	0	0	0	1	1	0	7	1.21915e-05
		F107	0	0	0	1	0	0	1	0	1	0	1	1	0	1	1	7	1.21915e-05
		C919	0	0	0	1	2	1	0	1	0	1	0	0	0	0	1	7	1.21915e-05
		C538	0	0	0	1	0	0	2	0	0	1	2	0	0	1	0	7	1.21915e-05
		Y831	0	0	0	1	0	0	0	0	1	1	1	0	1	1	1	7	1.21915e-05
		K831	0	0	0	1	0	1	1	1	0	0	0	1	0	1	1	7	1.21915e-05
		K921	0	0	0	1	0	2	0	0	0	1	0	0	1	1	1	7	1.21915e-05
		J150	0	0	0	1	0	0	2	1	1	0	0	0	1	0	1	7	1.21915e-05
		E161	0	0	0	0	2	1	0	0	1	0	1	1	0	0	1	7	1.21915e-05
		W877	0	0	0	0	2	0	0	1	0	0	2	2	0	0	0	7	1.21915e-05
		C060	0	0	0	0	2	0	0	0	0	0	1	2	0	1	1	7	1.21915e-05
		I300	0	0	0	0	1	0	0	1	1	0	0	2	1	1	0	7	1.21915e-05
		A409	0	0	0	0	1	0	0	1	2	1	1	1	0	0	0	7	1.21915e-05
		D500	0	0	0	0	1	0	1	1	0	0	0	2	0	0	2	7	1.21915e-05
		B559	0	0	0	0	0	2	0	1	1	0	0	1	1	0	1	7	1.21915e-05
		J128	0	0	0	0	0	1	0	0	0	1	0	2	0	0	3	7	1.21915e-05
		Q219	0	0	0	0	0	0	3	0	1	0	0	0	1	0	2	7	1.21915e-05
		C119	0	0	0	0	0	0	2	3	0	0	1	0	1	0	0	7	1.21915e-05
		N079	0	0	0	0	0	0	0	1	1	0	0	1	0	1	3	7	1.21915e-05
		Q234	0	0	0	0	0	0	0	0	0	1	1	3	2	0	0	7	1.21915e-05
		G936	2	0	0	0	0	1	0	0	1	0	0	0	0	1	1	6	1.04498e-05
		C579	2	1	0	1	0	0	1	1	0	0	0	0	0	0	0	6	1.04498e-05
		D329	1	0	0	0	0	0	1	0	0	1	0	0	0	3	0	6	1.04498e-05
		I400	1	0	0	0	0	2	0	0	1	0	1	0	0	1	0	6	1.04498e-05
		N159	1	0	1	0	0	0	1	0	0	1	1	0	0	1	0	6	1.04498e-05
		B171	1	1	1	0	0	0	0	0	0	2	0	1	0	0	0	6	1.04498e-05
		A085	1	0	0	1	0	2	0	0	0	0	0	1	0	1	0	6	1.04498e-05
		K759	1	2	0	0	0	0	0	2	0	0	0	0	0	1	0	6	1.04498e-05
		C410	1	0	0	0	0	0	0	1	0	1	0	1	0	1	1	6	1.04498e-05
		E120	1	0	0	0	3	0	1	0	1	0	0	0	0	0	0	6	1.04498e-05
		F190	1	0	0	0	0	0	1	1	1	0	1	0	0	0	1	6	1.04498e-05
		I011	1	3	0	0	0	0	0	0	0	1	0	0	0	0	1	6	1.04498e-05
		K430	0	2	1	0	1	0	0	0	0	1	0	0	1	0	0	6	1.04498e-05
		G408	0	1	0	1	0	0	1	0	1	0	0	1	1	0	0	6	1.04498e-05
		J13	0	1	0	0	0	0	0	0	0	0	2	1	1	0	1	6	1.04498e-05
		D291	0	1	1	0	0	0	1	1	0	1	0	0	0	0	1	6	1.04498e-05
		L930	0	1	1	0	1	0	1	0	1	0	0	0	1	0	0	6	1.04498e-05
		X659	0	1	1	0	0	0	1	0	1	1	0	0	0	1	0	6	1.04498e-05
		I078	0	1	0	1	0	0	0	1	1	1	1	0	0	0	0	6	1.04498e-05
		D259	0	1	1	0	0	1	1	0	0	0	0	0	1	0	1	6	1.04498e-05
		C790	0	0	1	0	0	1	0	1	0	0	0	0	1	1	1	6	1.04498e-05
		V99	0	0	1	0	2	3	0	0	0	0	0	0	0	0	0	6	1.04498e-05
		C07	0	0	1	0	0	1	1	0	0	1	0	0	0	0	2	6	1.04498e-05
		I789	0	0	1	0	0	1	0	0	1	0	1	1	0	1	0	6	1.04498e-05
		G410	0	0	1	0	2	1	0	0	1	1	0	0	0	0	0	6	1.04498e-05
		M348	0	0	1	0	0	0	1	0	0	1	0	1	0	2	0	6	1.04498e-05
		Y835	0	0	1	0	0	1	1	1	0	0	0	0	1	1	0	6	1.04498e-05
		G308	0	0	1	0	0	0	0	0	1	0	0	0	1	0	3	6	1.04498e-05
		C188	0	0	1	0	1	1	0	0	0	0	1	0	1	1	0	6	1.04498e-05
		W198	0	0	1	0	0	1	1	0	0	1	0	0	0	1	1	6	1.04498e-05
		W748	0	0	1	0	0	2	0	0	0	0	0	1	1	1	0	6	1.04498e-05
		N281	0	0	1	1	0	0	1	0	1	1	1	0	0	0	0	6	1.04498e-05
		H830	0	0	0	2	0	0	0	0	1	1	0	0	1	1	0	6	1.04498e-05
		Q213	0	0	0	2	0	0	0	1	0	0	1	0	2	0	0	6	1.04498e-05
		J942	0	0	0	1	1	0	0	0	0	0	1	1	1	0	1	6	1.04498e-05
		F191	0	0	0	1	0	1	0	0	0	0	1	1	1	0	1	6	1.04498e-05
		M009	0	0	0	0	2	0	0	0	0	1	2	1	0	0	0	6	1.04498e-05
		D600	0	0	0	0	1	1	2	0	0	0	1	1	0	0	0	6	1.04498e-05
		G458	0	0	0	0	1	0	2	0	1	1	0	0	0	1	0	6	1.04498e-05
		I740	0	0	0	0	1	0	1	1	1	0	0	0	0	1	1	6	1.04498e-05
		K811	0	0	0	0	0	1	1	0	1	0	0	1	2	0	0	6	1.04498e-05
		X649	0	0	0	0	0	1	1	0	1	0	0	0	2	1	0	6	1.04498e-05
		Y86	0	0	0	0	0	1	1	0	0	0	0	4	0	0	0	6	1.04498e-05
		C791	0	0	0	0	0	1	1	0	1	2	0	0	0	0	1	6	1.04498e-05
		V234	0	0	0	0	0	1	1	0	1	1	0	0	1	1	0	6	1.04498e-05
		J118	0	0	0	0	0	0	2	2	0	0	0	0	0	0	2	6	1.04498e-05
		C945	0	0	0	0	0	0	1	0	0	0	0	1	0	2	2	6	1.04498e-05
		I742	0	0	0	0	0	0	1	0	0	1	0	1	1	1	1	6	1.04498e-05
		Y149	0	0	0	0	0	0	0	1	0	0	0	1	2	1	1	6	1.04498e-05
		W749	0	0	0	0	0	0	0	1	0	1	1	0	0	1	2	6	1.04498e-05
		E135	0	0	0	0	0	0	0	1	1	0	1	0	3	0	0	6	1.04498e-05
		G300	0	0	0	0	0	0	0	1	0	0	1	1	0	2	1	6	1.04498e-05
		C218	0	0	0	0	0	0	0	0	0	2	1	0	1	0	2	6	1.04498e-05
		J209	3	0	1	1	0	0	0	0	0	0	0	0	0	0	0	5	8.70819e-06
		D377	2	0	0	0	0	0	2	0	0	0	0	1	0	0	0	5	8.70819e-06
		A279	2	0	0	0	0	1	0	0	0	0	0	1	0	0	1	5	8.70819e-06
		D320	2	0	0	0	0	0	0	0	1	0	0	1	1	0	0	5	8.70819e-06
		X699	1	0	0	0	1	0	0	0	0	0	1	0	2	0	0	5	8.70819e-06
		K560	1	0	0	1	0	0	0	0	1	0	0	0	0	2	0	5	8.70819e-06
		X700	1	0	0	0	0	0	1	1	0	0	1	0	0	0	1	5	8.70819e-06
		I859	1	0	0	0	0	0	1	1	0	0	0	1	0	0	1	5	8.70819e-06
		N280	1	0	0	2	0	0	1	0	0	0	0	0	0	1	0	5	8.70819e-06
		I281	1	0	0	0	0	0	0	0	1	0	1	1	1	0	0	5	8.70819e-06
		J451	1	0	0	0	1	1	1	0	1	0	0	0	0	0	0	5	8.70819e-06
		D489	1	0	0	0	0	1	0	2	0	0	0	0	0	0	1	5	8.70819e-06
		C761	1	0	0	0	0	2	0	0	0	0	0	0	1	1	0	5	8.70819e-06
		G406	1	0	0	0	0	2	1	0	0	0	0	0	0	0	1	5	8.70819e-06
		F149	1	2	1	0	0	0	0	0	0	0	0	0	0	0	1	5	8.70819e-06
		B91	1	0	0	0	0	0	1	0	0	0	0	1	1	0	1	5	8.70819e-06
		V475	1	0	0	0	0	0	0	0	2	0	1	1	0	0	0	5	8.70819e-06
		M053	1	1	0	0	0	0	0	1	0	0	1	0	0	0	1	5	8.70819e-06
		D694	1	0	0	0	0	2	0	0	0	1	0	0	0	1	0	5	8.70819e-06
		I831	1	0	0	0	1	0	1	1	0	0	1	0	0	0	0	5	8.70819e-06
		J100	0	1	1	1	0	0	0	0	0	0	0	0	0	2	0	5	8.70819e-06
		E122	0	1	0	0	0	0	0	0	1	0	1	1	1	0	0	5	8.70819e-06
		K221	0	1	0	1	1	1	0	1	0	0	0	0	0	0	0	5	8.70819e-06
		Q259	0	1	0	0	2	0	0	0	1	0	0	0	0	0	1	5	8.70819e-06
		G589	0	1	1	2	0	1	0	0	0	0	0	0	0	0	0	5	8.70819e-06
		E274	0	1	1	0	1	1	0	1	0	0	0	0	0	0	0	5	8.70819e-06
		K461	0	1	0	1	0	1	0	0	0	1	0	0	0	1	0	5	8.70819e-06
		X239	0	1	0	1	0	0	0	0	0	0	0	1	0	1	1	5	8.70819e-06
		K318	0	1	1	0	0	1	0	1	0	0	0	0	0	0	1	5	8.70819e-06
		E748	0	1	0	1	0	0	0	0	1	1	0	1	0	0	0	5	8.70819e-06
		E640	0	1	0	1	1	0	0	0	1	0	1	0	0	0	0	5	8.70819e-06
		Q239	0	1	1	0	0	1	1	0	1	0	0	0	0	0	0	5	8.70819e-06
		K571	0	1	0	0	1	0	0	0	0	0	1	1	0	1	0	5	8.70819e-06
		K265	0	1	0	0	0	0	1	0	1	0	0	1	0	1	0	5	8.70819e-06
		W100	0	1	0	0	1	1	0	0	0	0	0	1	1	0	0	5	8.70819e-06
		D728	0	1	0	0	0	1	0	1	0	0	2	0	0	0	0	5	8.70819e-06
		C570	0	1	0	1	0	0	0	1	1	1	0	0	0	0	0	5	8.70819e-06
		D471	0	1	0	0	0	0	0	1	0	1	1	0	1	0	0	5	8.70819e-06
		E729	0	1	0	0	1	0	0	0	0	0	2	1	0	0	0	5	8.70819e-06
		I615	0	1	0	0	1	0	0	0	0	0	1	1	1	0	0	5	8.70819e-06
		R99	0	1	1	0	1	0	0	0	0	0	0	2	0	0	0	5	8.70819e-06
		M512	0	0	1	1	0	0	1	0	0	0	1	0	0	1	0	5	8.70819e-06
		I630	0	0	1	1	1	0	0	0	1	0	0	0	0	0	1	5	8.70819e-06
		X209	0	0	1	0	2	0	0	0	1	0	0	0	0	1	0	5	8.70819e-06
		G700	0	0	1	0	0	0	1	0	0	1	1	0	0	1	0	5	8.70819e-06
		X994	0	0	1	0	0	0	0	1	0	1	0	1	1	0	0	5	8.70819e-06
		K404	0	0	1	0	0	0	0	0	1	1	1	0	1	0	0	5	8.70819e-06
		K413	0	0	1	0	1	0	0	0	1	0	1	0	0	1	0	5	8.70819e-06
		K702	0	0	1	0	1	0	0	0	2	0	0	0	1	0	0	5	8.70819e-06
		N411	0	0	1	0	0	1	0	0	0	1	0	0	2	0	0	5	8.70819e-06
		A084	0	0	1	1	0	1	0	0	0	0	1	0	1	0	0	5	8.70819e-06
		I427	0	0	1	0	0	0	0	2	0	0	0	1	1	0	0	5	8.70819e-06
		I631	0	0	1	0	1	0	0	0	1	1	0	0	0	1	0	5	8.70819e-06
		C785	0	0	0	2	0	0	1	1	1	0	0	0	0	0	0	5	8.70819e-06
		E720	0	0	0	2	0	0	0	0	0	2	0	0	1	0	0	5	8.70819e-06
		F108	0	0	0	1	0	1	0	0	0	1	0	0	1	0	1	5	8.70819e-06
		A219	0	0	0	1	0	0	1	0	0	1	0	0	0	2	0	5	8.70819e-06
		C749	0	0	0	1	1	0	0	0	0	1	1	0	0	1	0	5	8.70819e-06
		Q250	0	0	0	1	0	1	0	0	0	0	1	0	2	0	0	5	8.70819e-06
		G610	0	0	0	1	0	1	0	1	1	0	0	0	0	0	1	5	8.70819e-06
		R54	0	0	0	1	0	0	0	2	0	0	0	0	2	0	0	5	8.70819e-06
		E069	0	0	0	1	0	0	0	3	0	0	1	0	0	0	0	5	8.70819e-06
		I607	0	0	0	1	0	0	1	0	0	0	0	0	0	2	1	5	8.70819e-06
		I610	0	0	0	1	0	0	0	0	0	0	1	0	0	0	3	5	8.70819e-06
		W192	0	0	0	0	2	0	0	0	2	1	0	0	0	0	0	5	8.70819e-06
		C795	0	0	0	0	1	1	0	0	0	1	0	2	0	0	0	5	8.70819e-06
		K429	0	0	0	0	1	1	1	1	1	0	0	0	0	0	0	5	8.70819e-06
		K260	0	0	0	0	1	0	0	0	1	0	0	0	1	1	1	5	8.70819e-06
		G10	0	0	0	0	1	0	0	1	0	0	1	0	1	1	0	5	8.70819e-06
		X337	0	0	0	0	1	1	0	1	0	1	0	0	1	0	0	5	8.70819e-06
		V899	0	0	0	0	1	0	0	1	0	0	0	2	0	1	0	5	8.70819e-06
		D589	0	0	0	0	1	1	0	0	1	0	0	1	0	1	0	5	8.70819e-06
		C248	0	0	0	0	1	0	1	0	1	0	1	0	0	0	1	5	8.70819e-06
		E130	0	0	0	0	1	0	0	2	2	0	0	0	0	0	0	5	8.70819e-06
		V489	0	0	0	0	1	0	1	0	0	1	0	1	0	0	1	5	8.70819e-06
		E055	0	0	0	0	1	1	0	1	0	0	0	1	0	0	1	5	8.70819e-06
		M628	0	0	0	0	1	1	0	0	0	0	1	0	1	1	0	5	8.70819e-06
		Q209	0	0	0	0	0	2	0	1	1	0	1	0	0	0	0	5	8.70819e-06
		K261	0	0	0	0	0	1	0	1	0	1	0	1	1	0	0	5	8.70819e-06
		C851	0	0	0	0	0	1	0	0	0	0	1	0	1	1	1	5	8.70819e-06
		C751	0	0	0	0	0	1	0	0	0	0	1	0	2	1	0	5	8.70819e-06
		A060	0	0	0	0	0	1	0	0	1	1	1	0	0	1	0	5	8.70819e-06
		V099	0	0	0	0	0	1	0	1	1	0	2	0	0	0	0	5	8.70819e-06
		A199	0	0	0	0	0	1	0	1	1	0	0	0	2	0	0	5	8.70819e-06
		C182	0	0	0	0	0	1	0	1	0	0	0	0	0	1	2	5	8.70819e-06
		X440	0	0	0	0	0	0	1	0	1	0	0	1	0	1	1	5	8.70819e-06
		D479	0	0	0	0	0	0	1	0	0	2	0	1	0	0	1	5	8.70819e-06
		C341	0	0	0	0	0	0	1	0	0	0	2	0	0	1	1	5	8.70819e-06
		J853	0	0	0	0	0	0	1	0	0	0	0	2	0	1	1	5	8.70819e-06
		E15	0	0	0	0	0	0	0	1	1	0	0	0	0	1	2	5	8.70819e-06
		E871	0	0	0	0	0	0	0	1	0	0	1	0	1	1	1	5	8.70819e-06
		K271	0	0	0	0	0	0	0	1	1	1	1	1	0	0	0	5	8.70819e-06
		I280	0	0	0	0	0	0	0	0	1	1	1	0	1	1	0	5	8.70819e-06
		A059	2	0	0	0	0	1	0	0	0	1	0	0	0	0	0	4	6.96655e-06
		D66	2	0	0	1	0	0	0	0	0	0	0	0	0	1	0	4	6.96655e-06
		C629	2	0	0	0	0	0	0	1	0	0	0	0	0	1	0	4	6.96655e-06
		P570	2	1	0	0	0	0	0	0	0	0	0	1	0	0	0	4	6.96655e-06
		K551	1	0	1	0	0	0	0	0	0	0	0	2	0	0	0	4	6.96655e-06
		A180	1	0	0	1	1	0	1	0	0	0	0	0	0	0	0	4	6.96655e-06
		K868	1	0	0	0	1	0	0	0	1	0	1	0	0	0	0	4	6.96655e-06
		G709	1	1	1	0	0	0	0	0	0	1	0	0	0	0	0	4	6.96655e-06
		M100	1	1	0	0	0	0	0	1	0	0	0	0	0	1	0	4	6.96655e-06
		K610	1	0	0	0	1	0	0	0	0	0	0	1	1	0	0	4	6.96655e-06
		K229	1	0	0	0	0	2	0	0	1	0	0	0	0	0	0	4	6.96655e-06
		K256	1	0	0	0	0	0	1	0	0	0	0	0	0	1	1	4	6.96655e-06
		B159	1	1	0	0	0	0	0	1	0	0	1	0	0	0	0	4	6.96655e-06
		V284	1	0	0	0	0	0	0	0	0	0	1	1	1	0	0	4	6.96655e-06
		I891	1	0	0	1	0	0	0	0	0	0	1	0	1	0	0	4	6.96655e-06
		F339	1	0	0	0	0	0	0	1	0	0	1	0	0	1	0	4	6.96655e-06
		D464	1	1	0	0	0	0	0	1	0	0	0	1	0	0	0	4	6.96655e-06
		W062	1	0	0	0	0	0	0	0	1	1	0	0	0	1	0	4	6.96655e-06
		C765	1	0	0	0	0	1	1	0	0	1	0	0	0	0	0	4	6.96655e-06
		E128	1	0	0	0	0	1	0	0	0	0	0	0	0	2	0	4	6.96655e-06
		M059	1	0	0	0	0	0	1	1	1	0	0	0	0	0	0	4	6.96655e-06
		F119	1	0	0	0	0	1	0	0	1	0	1	0	0	0	0	4	6.96655e-06
		N133	1	0	0	0	0	0	0	0	0	2	0	0	0	0	1	4	6.96655e-06
		V031	1	1	0	0	1	0	1	0	0	0	0	0	0	0	0	4	6.96655e-06
		K833	0	2	0	0	0	0	0	0	0	0	0	2	0	0	0	4	6.96655e-06
		B54	0	1	0	1	1	0	1	0	0	0	0	0	0	0	0	4	6.96655e-06
		K20	0	1	0	0	1	0	0	0	0	0	0	1	1	0	0	4	6.96655e-06
		K513	0	1	0	1	2	0	0	0	0	0	0	0	0	0	0	4	6.96655e-06
		Q221	0	1	0	0	1	0	0	1	0	0	0	0	1	0	0	4	6.96655e-06
		G039	0	1	1	0	0	0	0	0	0	1	0	1	0	0	0	4	6.96655e-06
		A319	0	1	1	0	0	0	0	1	0	0	1	0	0	0	0	4	6.96655e-06
		K638	0	1	1	0	1	0	0	0	0	0	0	0	0	1	0	4	6.96655e-06
		Q899	0	1	1	0	1	0	0	0	0	0	0	0	0	1	0	4	6.96655e-06
		J860	0	1	0	0	0	0	0	1	1	1	0	0	0	0	0	4	6.96655e-06
		B189	0	1	0	1	0	0	0	0	0	0	0	0	1	1	0	4	6.96655e-06
		G119	0	1	0	0	0	0	0	0	1	0	0	0	1	1	0	4	6.96655e-06
		E859	0	1	0	0	1	1	0	0	0	1	0	0	0	0	0	4	6.96655e-06
		I849	0	1	1	0	0	0	1	0	0	0	1	0	0	0	0	4	6.96655e-06
		Q203	0	1	0	0	0	1	0	1	0	0	0	0	1	0	0	4	6.96655e-06
		C97	0	0	3	0	0	0	0	0	0	0	0	1	0	0	0	4	6.96655e-06
		G628	0	0	3	0	0	0	0	0	0	0	0	0	0	1	0	4	6.96655e-06
		J677	0	0	2	0	0	0	0	0	1	0	0	1	0	0	0	4	6.96655e-06
		I808	0	0	2	0	0	0	0	1	0	0	0	0	1	0	0	4	6.96655e-06
		I139	0	0	2	1	0	0	0	0	0	0	0	0	1	0	0	4	6.96655e-06
		D219	0	0	1	0	0	0	0	0	0	0	0	2	0	1	0	4	6.96655e-06
		O903	0	0	1	0	0	0	0	1	0	0	1	0	0	0	1	4	6.96655e-06
		G060	0	0	1	0	0	2	0	0	1	0	0	0	0	0	0	4	6.96655e-06
		C380	0	0	1	0	0	0	0	0	1	0	0	1	0	0	1	4	6.96655e-06
		C168	0	0	1	0	0	0	0	1	0	0	0	0	0	1	1	4	6.96655e-06
		B551	0	0	1	1	0	1	0	0	0	0	0	0	0	1	0	4	6.96655e-06
		W194	0	0	1	0	0	0	0	0	0	1	1	0	1	0	0	4	6.96655e-06
		I829	0	0	1	0	0	0	0	0	0	1	0	0	0	1	1	4	6.96655e-06
		B181	0	0	1	0	0	0	0	0	0	2	0	0	0	1	0	4	6.96655e-06
		I800	0	0	1	0	0	0	1	1	1	0	0	0	0	0	0	4	6.96655e-06
		C720	0	0	1	0	0	1	0	1	0	0	1	0	0	0	0	4	6.96655e-06
		M332	0	0	1	1	0	1	0	0	1	0	0	0	0	0	0	4	6.96655e-06
		I132	0	0	1	1	1	0	0	0	0	0	0	1	0	0	0	4	6.96655e-06
		D591	0	0	0	3	0	0	0	0	0	0	0	0	0	0	1	4	6.96655e-06
		G938	0	0	0	2	0	0	0	0	1	0	1	0	0	0	0	4	6.96655e-06
		B690	0	0	0	2	0	0	1	0	0	0	0	0	1	0	0	4	6.96655e-06
		M310	0	0	0	2	0	0	1	0	0	0	0	0	0	0	1	4	6.96655e-06
		F333	0	0	0	2	0	1	1	0	0	0	0	0	0	0	0	4	6.96655e-06
		D430	0	0	0	2	0	0	1	1	0	0	0	0	0	0	0	4	6.96655e-06
		V485	0	0	0	2	0	0	0	0	2	0	0	0	0	0	0	4	6.96655e-06
		C445	0	0	0	1	0	0	0	0	0	2	0	1	0	0	0	4	6.96655e-06
		M313	0	0	0	1	0	0	2	0	0	0	0	1	0	0	0	4	6.96655e-06
		C678	0	0	0	1	0	0	0	0	0	0	1	1	1	0	0	4	6.96655e-06
		C699	0	0	0	1	0	0	0	0	0	1	0	1	0	1	0	4	6.96655e-06
		K351	0	0	0	1	0	1	0	0	1	0	0	1	0	0	0	4	6.96655e-06
		B949	0	0	0	0	3	1	0	0	0	0	0	0	0	0	0	4	6.96655e-06
		N139	0	0	0	0	2	1	0	0	0	0	0	0	0	1	0	4	6.96655e-06
		M479	0	0	0	0	2	0	0	1	0	0	1	0	0	0	0	4	6.96655e-06
		I951	0	0	0	0	2	0	0	1	1	0	0	0	0	0	0	4	6.96655e-06
		I018	0	0	0	0	2	0	0	0	0	0	0	1	1	0	0	4	6.96655e-06
		D383	0	0	0	0	1	0	0	0	1	0	1	1	0	0	0	4	6.96655e-06
		A047	0	0	0	0	1	0	0	0	2	0	0	0	0	1	0	4	6.96655e-06
		G049	0	0	0	0	1	0	0	0	0	0	0	2	1	0	0	4	6.96655e-06
		G318	0	0	0	0	1	0	2	1	0	0	0	0	0	0	0	4	6.96655e-06
		K599	0	0	0	0	1	0	1	0	0	0	0	0	1	1	0	4	6.96655e-06
		E220	0	0	0	0	0	2	0	0	1	0	0	0	0	1	0	4	6.96655e-06
		C300	0	0	0	0	0	2	0	0	1	0	0	0	0	1	0	4	6.96655e-06
		D735	0	0	0	0	0	1	1	0	1	1	0	0	0	0	0	4	6.96655e-06
		F140	0	0	0	0	0	1	0	0	1	0	0	0	0	2	0	4	6.96655e-06
		W699	0	0	0	0	0	1	0	0	0	1	0	0	1	0	1	4	6.96655e-06
		F332	0	0	0	0	0	1	1	0	0	0	0	1	0	1	0	4	6.96655e-06
		F171	0	0	0	0	0	1	0	1	0	0	1	1	0	0	0	4	6.96655e-06
		O141	0	0	0	0	0	1	0	0	0	1	1	0	0	0	1	4	6.96655e-06
		F323	0	0	0	0	0	1	0	2	0	0	1	0	0	0	0	4	6.96655e-06
		L039	0	0	0	0	0	1	0	1	1	0	0	0	0	0	1	4	6.96655e-06
		K869	0	0	0	0	0	1	1	0	0	0	0	0	1	0	1	4	6.96655e-06
		X689	0	0	0	0	0	0	3	0	0	1	0	0	0	0	0	4	6.96655e-06
		L031	0	0	0	0	0	0	1	0	0	0	0	1	2	0	0	4	6.96655e-06
		W109	0	0	0	0	0	0	1	0	0	0	1	1	0	1	0	4	6.96655e-06
		E125	0	0	0	0	0	0	1	0	2	0	0	0	1	0	0	4	6.96655e-06
		N498	0	0	0	0	0	0	1	0	2	0	1	0	0	0	0	4	6.96655e-06
		I608	0	0	0	0	0	0	1	0	0	0	2	0	0	0	1	4	6.96655e-06
		C833	0	0	0	0	0	0	1	0	0	0	0	0	1	2	0	4	6.96655e-06
		I720	0	0	0	0	0	0	1	0	0	0	1	2	0	0	0	4	6.96655e-06
		X680	0	0	0	0	0	0	1	0	0	1	0	0	1	0	1	4	6.96655e-06
		W840	0	0	0	0	0	0	1	0	0	3	0	0	0	0	0	4	6.96655e-06
		I408	0	0	0	0	0	0	0	2	0	0	0	1	0	0	1	4	6.96655e-06
		F321	0	0	0	0	0	0	0	2	0	0	0	1	0	1	0	4	6.96655e-06
		I635	0	0	0	0	0	0	0	2	0	0	0	0	1	0	1	4	6.96655e-06
		K740	0	0	0	0	0	0	0	1	0	0	1	0	1	0	1	4	6.96655e-06
		Y340	0	0	0	0	0	0	0	1	0	1	1	0	0	1	0	4	6.96655e-06
		Q230	0	0	0	0	0	0	0	1	0	0	0	0	1	2	0	4	6.96655e-06
		K828	0	0	0	0	0	0	0	0	1	1	1	0	1	0	0	4	6.96655e-06
		X230	0	0	0	0	0	0	0	0	1	0	0	2	1	0	0	4	6.96655e-06
		I061	0	0	0	0	0	0	0	0	0	1	1	1	0	0	1	4	6.96655e-06
		J678	0	0	0	0	0	0	0	0	0	1	0	2	0	0	1	4	6.96655e-06
		C969	0	0	0	0	0	0	0	0	0	1	0	0	2	1	0	4	6.96655e-06
		W780	0	0	0	0	0	0	0	0	0	1	0	2	0	0	1	4	6.96655e-06
		A403	0	0	0	0	0	0	0	0	0	0	0	2	1	1	0	4	6.96655e-06
		C342	0	0	0	0	0	0	0	0	0	0	0	1	0	2	1	4	6.96655e-06
		J157	2	1	0	0	0	0	0	0	0	0	0	0	0	0	0	3	5.22492e-06
		D473	2	0	0	0	0	0	1	0	0	0	0	0	0	0	0	3	5.22492e-06
		Q782	1	1	1	0	0	0	0	0	0	0	0	0	0	0	0	3	5.22492e-06
		O149	1	0	0	0	0	0	1	1	0	0	0	0	0	0	0	3	5.22492e-06
		O101	1	0	1	0	1	0	0	0	0	0	0	0	0	0	0	3	5.22492e-06
		B203	1	0	0	0	0	0	1	0	0	0	0	1	0	0	0	3	5.22492e-06
		K421	1	0	0	1	0	1	0	0	0	0	0	0	0	0	0	3	5.22492e-06
		A86	1	0	0	1	0	0	0	0	0	0	0	0	0	1	0	3	5.22492e-06
		J981	1	1	0	0	0	0	0	0	0	0	0	0	0	1	0	3	5.22492e-06
		O159	1	0	0	0	1	0	0	0	0	0	0	0	1	0	0	3	5.22492e-06
		I613	1	0	0	1	0	0	0	0	0	1	0	0	0	0	0	3	5.22492e-06
		W557	1	0	1	1	0	0	0	0	0	0	0	0	0	0	0	3	5.22492e-06
		H669	1	0	1	0	0	0	1	0	0	0	0	0	0	0	0	3	5.22492e-06
		C384	1	0	0	0	0	1	0	1	0	0	0	0	0	0	0	3	5.22492e-06
		E671	1	0	0	0	0	0	1	0	0	0	0	1	0	0	0	3	5.22492e-06
		Y309	1	0	0	0	0	0	0	1	0	0	0	0	0	0	1	3	5.22492e-06
		C328	1	0	0	0	0	0	0	0	0	1	0	0	1	0	0	3	5.22492e-06
		J982	1	0	0	0	0	0	1	0	0	0	0	1	0	0	0	3	5.22492e-06
		V800	0	1	0	0	0	1	0	0	0	1	0	0	0	0	0	3	5.22492e-06
		I098	0	1	0	1	0	0	0	0	1	0	0	0	0	0	0	3	5.22492e-06
		I723	0	1	0	0	1	0	0	0	0	0	1	0	0	0	0	3	5.22492e-06
		C186	0	1	0	0	0	0	0	0	0	1	0	0	0	0	1	3	5.22492e-06
		F162	0	1	0	0	0	0	0	0	0	1	1	0	0	0	0	3	5.22492e-06
		J691	0	1	0	0	0	0	1	0	0	0	0	1	0	0	0	3	5.22492e-06
		N058	0	1	0	0	0	0	0	0	0	0	0	0	1	1	0	3	5.22492e-06
		I745	0	1	0	0	0	0	0	0	0	0	1	0	0	0	1	3	5.22492e-06
		Y099	0	1	0	0	0	0	0	0	0	1	0	0	0	1	0	3	5.22492e-06
		G932	0	1	0	0	0	0	0	0	1	0	0	0	1	0	0	3	5.22492e-06
		D350	0	1	0	0	0	1	1	0	0	0	0	0	0	0	0	3	5.22492e-06
		E831	0	1	0	0	0	0	0	0	0	0	0	0	0	2	0	3	5.22492e-06
		J101	0	1	0	0	0	0	1	0	0	0	0	0	0	1	0	3	5.22492e-06
		W809	0	1	0	0	0	0	0	0	0	0	0	0	2	0	0	3	5.22492e-06
		J689	0	1	0	1	0	0	1	0	0	0	0	0	0	0	0	3	5.22492e-06
		Q220	0	0	2	0	0	0	0	0	0	0	0	0	0	0	1	3	5.22492e-06
		E702	0	0	2	0	0	1	0	0	0	0	0	0	0	0	0	3	5.22492e-06
		K269	0	0	2	0	1	0	0	0	0	0	0	0	0	0	0	3	5.22492e-06
		W708	0	0	1	0	0	0	0	0	0	0	0	1	0	1	0	3	5.22492e-06
		M359	0	0	1	0	0	0	0	0	0	0	0	1	1	0	0	3	5.22492e-06
		E799	0	0	1	0	0	0	0	0	0	0	0	0	0	1	1	3	5.22492e-06
		K552	0	0	1	1	1	0	0	0	0	0	0	0	0	0	0	3	5.22492e-06
		D693	0	0	1	1	0	0	0	0	0	0	1	0	0	0	0	3	5.22492e-06
		C184	0	0	1	0	0	0	0	0	0	0	0	0	1	1	0	3	5.22492e-06
		W878	0	0	1	0	0	0	1	0	0	0	0	0	0	1	0	3	5.22492e-06
		Y830	0	0	1	0	0	1	0	1	0	0	0	0	0	0	0	3	5.22492e-06
		K661	0	0	1	0	1	0	1	0	0	0	0	0	0	0	0	3	5.22492e-06
		Q204	0	0	1	0	0	0	0	0	0	0	0	2	0	0	0	3	5.22492e-06
		N308	0	0	1	0	0	0	0	0	1	0	1	0	0	0	0	3	5.22492e-06
		C52	0	0	1	0	0	1	0	0	1	0	0	0	0	0	0	3	5.22492e-06
		D180	0	0	1	0	0	1	0	1	0	0	0	0	0	0	0	3	5.22492e-06
		C444	0	0	1	0	0	0	0	0	0	0	2	0	0	0	0	3	5.22492e-06
		X620	0	0	1	0	0	0	0	0	0	0	1	0	0	0	1	3	5.22492e-06
		C152	0	0	1	0	0	0	0	1	0	0	0	0	0	0	1	3	5.22492e-06
		W191	0	0	1	0	0	0	0	0	0	1	0	0	0	0	1	3	5.22492e-06
		I633	0	0	1	0	0	0	1	0	0	1	0	0	0	0	0	3	5.22492e-06
		E209	0	0	1	0	0	0	0	0	0	0	0	0	1	0	1	3	5.22492e-06
		K228	0	0	0	2	0	0	0	0	0	0	0	0	0	1	0	3	5.22492e-06
		C210	0	0	0	1	0	0	1	0	1	0	0	0	0	0	0	3	5.22492e-06
		C796	0	0	0	1	0	0	0	0	1	0	0	0	0	1	0	3	5.22492e-06
		M339	0	0	0	1	0	0	0	0	0	0	1	1	0	0	0	3	5.22492e-06
		C845	0	0	0	1	0	1	0	0	0	1	0	0	0	0	0	3	5.22492e-06
		J960	0	0	0	1	0	0	0	0	0	0	0	1	0	1	0	3	5.22492e-06
		K839	0	0	0	1	0	0	0	0	0	1	1	0	0	0	0	3	5.22492e-06
		C793	0	0	0	1	0	0	1	0	0	1	0	0	0	0	0	3	5.22492e-06
		C261	0	0	0	1	0	0	0	1	0	0	0	0	1	0	0	3	5.22492e-06
		J152	0	0	0	1	0	0	0	0	0	1	0	0	1	0	0	3	5.22492e-06
		C162	0	0	0	1	0	0	0	1	0	1	0	0	0	0	0	3	5.22492e-06
		O998	0	0	0	1	0	0	0	0	0	1	1	0	0	0	0	3	5.22492e-06
		X950	0	0	0	1	0	0	1	1	0	0	0	0	0	0	0	3	5.22492e-06
		V685	0	0	0	1	1	0	0	0	0	0	0	0	1	0	0	3	5.22492e-06
		G118	0	0	0	1	0	0	0	0	0	0	0	2	0	0	0	3	5.22492e-06
		E052	0	0	0	1	0	1	0	0	0	0	0	1	0	0	0	3	5.22492e-06
		E259	0	0	0	0	2	0	0	0	0	0	0	0	0	1	0	3	5.22492e-06
		C689	0	0	0	0	2	0	0	0	0	0	0	0	0	1	0	3	5.22492e-06
		V235	0	0	0	0	1	0	0	0	1	0	1	0	0	0	0	3	5.22492e-06
		C931	0	0	0	0	1	0	0	0	1	0	0	1	0	0	0	3	5.22492e-06
		I130	0	0	0	0	1	0	0	0	0	0	0	0	0	0	2	3	5.22492e-06
		I512	0	0	0	0	1	0	0	0	2	0	0	0	0	0	0	3	5.22492e-06
		I722	0	0	0	0	1	0	1	0	0	0	0	1	0	0	0	3	5.22492e-06
		I012	0	0	0	0	1	2	0	0	0	0	0	0	0	0	0	3	5.22492e-06
		Q874	0	0	0	0	1	0	0	0	0	0	0	0	0	1	1	3	5.22492e-06
		Y219	0	0	0	0	1	0	0	0	0	0	0	0	0	1	1	3	5.22492e-06
		I890	0	0	0	0	1	0	0	0	0	0	0	0	1	1	0	3	5.22492e-06
		A159	0	0	0	0	1	0	0	0	1	0	0	1	0	0	0	3	5.22492e-06
		Q225	0	0	0	0	1	0	0	0	0	0	0	0	0	2	0	3	5.22492e-06
		C414	0	0	0	0	1	0	0	0	1	0	0	0	0	1	0	3	5.22492e-06
		M469	0	0	0	0	1	0	0	0	0	0	0	0	0	1	1	3	5.22492e-06
		G969	0	0	0	0	1	0	1	0	0	0	1	0	0	0	0	3	5.22492e-06
		G009	0	0	0	0	1	0	0	0	1	0	0	1	0	0	0	3	5.22492e-06
		K632	0	0	0	0	1	0	0	0	0	0	0	0	1	0	1	3	5.22492e-06
		K658	0	0	0	0	1	0	0	2	0	0	0	0	0	0	0	3	5.22492e-06
		N368	0	0	0	0	1	0	0	2	0	0	0	0	0	0	0	3	5.22492e-06
		C161	0	0	0	0	1	0	0	1	0	0	0	0	0	1	0	3	5.22492e-06
		O150	0	0	0	0	0	2	0	0	0	0	0	0	0	1	0	3	5.22492e-06
		P220	0	0	0	0	0	2	0	0	0	0	0	1	0	0	0	3	5.22492e-06
		C442	0	0	0	0	0	2	0	0	0	0	0	0	1	0	0	3	5.22492e-06
		E348	0	0	0	0	0	1	2	0	0	0	0	0	0	0	0	3	5.22492e-06
		J60	0	0	0	0	0	1	0	0	0	1	0	0	0	0	1	3	5.22492e-06
		K222	0	0	0	0	0	1	0	0	0	1	0	0	1	0	0	3	5.22492e-06
		K743	0	0	0	0	0	1	0	1	0	0	1	0	0	0	0	3	5.22492e-06
		K252	0	0	0	0	0	1	0	0	0	0	0	0	0	0	2	3	5.22492e-06
		V436	0	0	0	0	0	1	0	1	0	1	0	0	0	0	0	3	5.22492e-06
		C343	0	0	0	0	0	1	1	0	1	0	0	0	0	0	0	3	5.22492e-06
		B402	0	0	0	0	0	1	0	0	0	1	0	0	0	1	0	3	5.22492e-06
		E132	0	0	0	0	0	1	0	0	0	0	0	1	1	0	0	3	5.22492e-06
		D752	0	0	0	0	0	1	0	1	0	0	1	0	0	0	0	3	5.22492e-06
		Q619	0	0	0	0	0	1	1	0	0	0	0	1	0	0	0	3	5.22492e-06
		F110	0	0	0	0	0	1	0	0	0	1	1	0	0	0	0	3	5.22492e-06
		J411	0	0	0	0	0	1	0	0	0	0	0	1	1	0	0	3	5.22492e-06
		X330	0	0	0	0	0	1	1	0	1	0	0	0	0	0	0	3	5.22492e-06
		E242	0	0	0	0	0	1	0	0	1	0	0	0	0	1	0	3	5.22492e-06
		E649	0	0	0	0	0	0	2	1	0	0	0	0	0	0	0	3	5.22492e-06
		Y090	0	0	0	0	0	0	2	0	0	0	0	0	1	0	0	3	5.22492e-06
		V486	0	0	0	0	0	0	2	0	0	0	1	0	0	0	0	3	5.22492e-06
		J698	0	0	0	0	0	0	2	0	1	0	0	0	0	0	0	3	5.22492e-06
		I318	0	0	0	0	0	0	1	0	0	0	1	0	0	0	1	3	5.22492e-06
		X654	0	0	0	0	0	0	1	1	0	0	0	0	1	0	0	3	5.22492e-06
		E755	0	0	0	0	0	0	1	0	0	1	0	0	1	0	0	3	5.22492e-06
		Y120	0	0	0	0	0	0	1	0	1	0	0	1	0	0	0	3	5.22492e-06
		F439	0	0	0	0	0	0	1	1	0	0	1	0	0	0	0	3	5.22492e-06
		F179	0	0	0	0	0	0	1	0	0	1	0	1	0	0	0	3	5.22492e-06
		E661	0	0	0	0	0	0	1	0	0	0	0	0	1	0	1	3	5.22492e-06
		I692	0	0	0	0	0	0	1	0	1	1	0	0	0	0	0	3	5.22492e-06
		D688	0	0	0	0	0	0	1	0	0	0	0	0	2	0	0	3	5.22492e-06
		Q336	0	0	0	0	0	0	1	0	0	1	0	0	0	1	0	3	5.22492e-06
		I311	0	0	0	0	0	0	1	1	1	0	0	0	0	0	0	3	5.22492e-06
		C049	0	0	0	0	0	0	1	0	0	0	0	1	1	0	0	3	5.22492e-06
		C670	0	0	0	0	0	0	1	1	0	1	0	0	0	0	0	3	5.22492e-06
		E211	0	0	0	0	0	0	1	0	0	1	0	0	0	1	0	3	5.22492e-06
		G404	0	0	0	0	0	0	1	0	0	0	1	1	0	0	0	3	5.22492e-06
		K822	0	0	0	0	0	0	1	0	0	0	1	0	1	0	0	3	5.22492e-06
		V280	0	0	0	0	0	0	1	0	1	0	0	1	0	0	0	3	5.22492e-06
		W182	0	0	0	0	0	0	1	0	0	1	1	0	0	0	0	3	5.22492e-06
		W854	0	0	0	0	0	0	0	1	0	0	0	0	0	1	1	3	5.22492e-06
		G903	0	0	0	0	0	0	0	1	1	0	0	0	0	0	1	3	5.22492e-06
		K591	0	0	0	0	0	0	0	1	0	0	1	0	0	1	0	3	5.22492e-06
		A412	0	0	0	0	0	0	0	1	1	0	0	1	0	0	0	3	5.22492e-06
		A267	0	0	0	0	0	0	0	1	1	0	0	0	1	0	0	3	5.22492e-06
		I721	0	0	0	0	0	0	0	1	1	0	0	1	0	0	0	3	5.22492e-06
		G210	0	0	0	0	0	0	0	0	2	0	1	0	0	0	0	3	5.22492e-06
		C578	0	0	0	0	0	0	0	0	2	0	0	1	0	0	0	3	5.22492e-06
		K761	0	0	0	0	0	0	0	0	1	0	1	0	0	0	1	3	5.22492e-06
		L021	0	0	0	0	0	0	0	0	1	0	0	1	0	1	0	3	5.22492e-06
		W069	0	0	0	0	0	0	0	0	1	0	0	0	2	0	0	3	5.22492e-06
		D691	0	0	0	0	0	0	0	0	1	1	0	0	0	1	0	3	5.22492e-06
		W874	0	0	0	0	0	0	0	0	1	1	0	1	0	0	0	3	5.22492e-06
		N151	0	0	0	0	0	0	0	0	1	0	0	0	1	1	0	3	5.22492e-06
		D508	0	0	0	0	0	0	0	0	1	0	0	1	0	1	0	3	5.22492e-06
		C501	0	0	0	0	0	0	0	0	1	1	0	0	0	0	1	3	5.22492e-06
		K519	0	0	0	0	0	0	0	0	1	0	0	0	0	0	2	3	5.22492e-06
		M340	0	0	0	0	0	0	0	0	1	0	2	0	0	0	0	3	5.22492e-06
		C321	0	0	0	0	0	0	0	0	1	0	1	0	0	1	0	3	5.22492e-06
		C059	0	0	0	0	0	0	0	0	1	1	0	1	0	0	0	3	5.22492e-06
		Y004	0	0	0	0	0	0	0	0	0	1	0	1	0	1	0	3	5.22492e-06
		G401	0	0	0	0	0	0	0	0	0	1	0	0	0	2	0	3	5.22492e-06
		Q240	0	0	0	0	0	0	0	0	0	1	0	0	2	0	0	3	5.22492e-06
		C718	0	0	0	0	0	0	0	0	0	1	1	0	0	1	0	3	5.22492e-06
		E349	0	0	0	0	0	0	0	0	0	1	1	0	1	0	0	3	5.22492e-06
		I770	0	0	0	0	0	0	0	0	0	1	0	0	1	1	0	3	5.22492e-06
		M350	0	0	0	0	0	0	0	0	0	1	1	0	1	0	0	3	5.22492e-06
		J108	0	0	0	0	0	0	0	0	0	0	2	0	0	1	0	3	5.22492e-06
		A929	0	0	0	0	0	0	0	0	0	0	2	1	0	0	0	3	5.22492e-06
		Y840	0	0	0	0	0	0	0	0	0	0	1	0	0	1	1	3	5.22492e-06
		C257	0	0	0	0	0	0	0	0	0	0	1	1	0	1	0	3	5.22492e-06
		C227	0	0	0	0	0	0	0	0	0	0	1	0	1	1	0	3	5.22492e-06
		C158	0	0	0	0	0	0	0	0	0	0	1	0	0	0	2	3	5.22492e-06
		C399	0	0	0	0	0	0	0	0	0	0	1	1	0	1	0	3	5.22492e-06
		J848	0	0	0	0	0	0	0	0	0	0	1	0	0	1	1	3	5.22492e-06
		W014	0	0	0	0	0	0	0	0	0	0	1	1	1	0	0	3	5.22492e-06
		V435	0	0	0	0	0	0	0	0	0	0	0	1	1	1	0	3	5.22492e-06
		Q02	0	0	0	0	0	0	0	0	0	0	0	0	1	1	1	3	5.22492e-06
		C839	0	0	0	0	0	0	0	0	0	0	0	0	1	0	2	3	5.22492e-06
		Y300	2	0	0	0	0	0	0	0	0	0	0	0	0	0	0	2	3.48328e-06
		D608	2	0	0	0	0	0	0	0	0	0	0	0	0	0	0	2	3.48328e-06
		C494	1	0	1	0	0	0	0	0	0	0	0	0	0	0	0	2	3.48328e-06
		Y280	1	0	0	0	1	0	0	0	0	0	0	0	0	0	0	2	3.48328e-06
		E041	1	0	0	0	0	0	1	0	0	0	0	0	0	0	0	2	3.48328e-06
		N328	1	0	0	0	0	1	0	0	0	0	0	0	0	0	0	2	3.48328e-06
		W690	1	0	1	0	0	0	0	0	0	0	0	0	0	0	0	2	3.48328e-06
		Y248	1	0	0	0	0	0	0	0	0	0	0	0	1	0	0	2	3.48328e-06
		Q238	1	0	0	0	0	0	1	0	0	0	0	0	0	0	0	2	3.48328e-06
		B178	1	0	1	0	0	0	0	0	0	0	0	0	0	0	0	2	3.48328e-06
		I600	1	0	1	0	0	0	0	0	0	0	0	0	0	0	0	2	3.48328e-06
		K820	1	0	0	0	0	0	1	0	0	0	0	0	0	0	0	2	3.48328e-06
		J430	1	0	0	0	0	0	0	1	0	0	0	0	0	0	0	2	3.48328e-06
		D410	1	0	0	0	0	0	0	0	1	0	0	0	0	0	0	2	3.48328e-06
		K928	1	0	0	0	0	0	0	0	0	0	0	0	1	0	0	2	3.48328e-06
		G728	1	1	0	0	0	0	0	0	0	0	0	0	0	0	0	2	3.48328e-06
		V446	1	0	0	0	0	0	0	0	1	0	0	0	0	0	0	2	3.48328e-06
		G231	1	0	0	0	0	0	0	0	0	0	0	0	0	0	1	2	3.48328e-06
		M511	1	0	0	0	0	0	0	0	0	0	0	1	0	0	0	2	3.48328e-06
		O721	1	1	0	0	0	0	0	0	0	0	0	0	0	0	0	2	3.48328e-06
		G911	1	0	0	0	0	0	0	0	0	0	0	0	0	1	0	2	3.48328e-06
		Q205	1	0	0	0	0	1	0	0	0	0	0	0	0	0	0	2	3.48328e-06
		B410	1	0	0	0	0	0	0	1	0	0	0	0	0	0	0	2	3.48328e-06
		I516	1	0	0	0	0	0	0	1	0	0	0	0	0	0	0	2	3.48328e-06
		E708	1	0	0	0	0	0	0	0	1	0	0	0	0	0	0	2	3.48328e-06
		W848	1	0	0	0	0	0	0	0	0	0	1	0	0	0	0	2	3.48328e-06
		Y841	1	0	0	0	0	0	0	0	0	0	0	0	0	1	0	2	3.48328e-06
		G951	1	0	0	0	0	1	0	0	0	0	0	0	0	0	0	2	3.48328e-06
		M320	1	0	0	0	0	0	0	0	1	0	0	0	0	0	0	2	3.48328e-06
		C490	1	0	0	0	0	0	1	0	0	0	0	0	0	0	0	2	3.48328e-06
		J949	1	0	0	0	0	0	0	0	1	0	0	0	0	0	0	2	3.48328e-06
		V294	1	0	0	0	0	0	0	0	0	0	0	1	0	0	0	2	3.48328e-06
		J704	0	2	0	0	0	0	0	0	0	0	0	0	0	0	0	2	3.48328e-06
		M165	0	1	0	0	0	0	0	0	0	1	0	0	0	0	0	2	3.48328e-06
		K752	0	1	0	0	0	0	0	1	0	0	0	0	0	0	0	2	3.48328e-06
		A305	0	1	0	0	0	0	0	0	0	0	1	0	0	0	0	2	3.48328e-06
		B019	0	1	0	0	0	0	0	0	0	1	0	0	0	0	0	2	3.48328e-06
		M859	0	1	0	0	0	0	0	0	0	0	0	0	0	1	0	2	3.48328e-06
		Y189	0	1	0	0	0	0	0	0	0	1	0	0	0	0	0	2	3.48328e-06
		X229	0	1	0	0	0	0	0	0	0	0	0	0	1	0	0	2	3.48328e-06
		B162	0	1	0	0	0	0	0	0	0	0	1	0	0	0	0	2	3.48328e-06
		D440	0	1	0	0	0	0	0	0	0	0	0	0	0	0	1	2	3.48328e-06
		K711	0	1	0	0	0	0	0	0	0	0	0	0	1	0	0	2	3.48328e-06
		C711	0	1	0	0	0	0	1	0	0	0	0	0	0	0	0	2	3.48328e-06
		K558	0	1	0	0	0	0	0	0	0	0	1	0	0	0	0	2	3.48328e-06
		P209	0	1	0	0	0	1	0	0	0	0	0	0	0	0	0	2	3.48328e-06
		C155	0	1	0	0	0	1	0	0	0	0	0	0	0	0	0	2	3.48328e-06
		I370	0	1	0	0	0	0	0	0	1	0	0	0	0	0	0	2	3.48328e-06
		Q212	0	1	0	0	0	0	0	0	0	0	0	1	0	0	0	2	3.48328e-06
		W070	0	1	0	0	0	0	1	0	0	0	0	0	0	0	0	2	3.48328e-06
		J81	0	1	0	0	0	0	0	1	0	0	0	0	0	0	0	2	3.48328e-06
		D331	0	1	0	0	0	0	0	0	0	0	0	0	0	0	1	2	3.48328e-06
		V134	0	1	0	0	1	0	0	0	0	0	0	0	0	0	0	2	3.48328e-06
		K272	0	1	0	0	0	0	0	0	0	0	0	1	0	0	0	2	3.48328e-06
		Y269	0	1	0	0	0	0	0	1	0	0	0	0	0	0	0	2	3.48328e-06
		C782	0	1	0	0	0	0	0	0	0	0	0	0	0	0	1	2	3.48328e-06
		I238	0	0	0	0	0	0	0	0	0	0	0	1	1	0	0	2	3.48328e-06
		V139	0	0	2	0	0	0	0	0	0	0	0	0	0	0	0	2	3.48328e-06
		V809	0	0	2	0	0	0	0	0	0	0	0	0	0	0	0	2	3.48328e-06
		G379	0	0	2	0	0	0	0	0	0	0	0	0	0	0	0	2	3.48328e-06
		E121	0	0	1	0	1	0	0	0	0	0	0	0	0	0	0	2	3.48328e-06
		A170	0	0	1	0	0	0	0	0	0	0	0	1	0	0	0	2	3.48328e-06
		E52	0	0	1	0	0	0	0	0	0	0	0	0	1	0	0	2	3.48328e-06
		X589	0	0	1	0	0	0	0	0	0	0	1	0	0	0	0	2	3.48328e-06
		C318	0	0	1	0	0	0	1	0	0	0	0	0	0	0	0	2	3.48328e-06
		L932	0	0	1	0	0	0	0	0	0	0	0	1	0	0	0	2	3.48328e-06
		O95	0	0	1	0	0	0	0	0	1	0	0	0	0	0	0	2	3.48328e-06
		C409	0	0	1	1	0	0	0	0	0	0	0	0	0	0	0	2	3.48328e-06
		K625	0	0	1	0	0	0	0	0	0	0	0	1	0	0	0	2	3.48328e-06
		K604	0	0	1	0	0	0	0	0	0	1	0	0	0	0	0	2	3.48328e-06
		F790	0	0	1	0	0	0	0	0	0	1	0	0	0	0	0	2	3.48328e-06
		R95	0	0	1	0	0	1	0	0	0	0	0	0	0	0	0	2	3.48328e-06
		X020	0	0	1	0	0	0	1	0	0	0	0	0	0	0	0	2	3.48328e-06
		E051	0	0	1	0	0	0	0	0	1	0	0	0	0	0	0	2	3.48328e-06
		E133	0	0	1	0	0	0	0	0	0	0	0	0	1	0	0	2	3.48328e-06
		X090	0	0	1	0	0	0	0	0	0	0	0	1	0	0	0	2	3.48328e-06
		I772	0	0	1	0	0	0	0	1	0	0	0	0	0	0	0	2	3.48328e-06
		D073	0	0	1	0	0	0	0	0	0	0	1	0	0	0	0	2	3.48328e-06
		E030	0	0	1	0	0	0	0	0	0	0	0	0	1	0	0	2	3.48328e-06
		N329	0	0	1	0	0	0	0	0	0	0	0	0	0	1	0	2	3.48328e-06
		I310	0	0	1	0	0	0	0	0	0	0	0	0	0	0	1	2	3.48328e-06
		J679	0	0	1	0	0	0	0	0	0	0	0	0	0	1	0	2	3.48328e-06
		X709	0	0	1	0	0	0	0	0	0	0	0	0	1	0	0	2	3.48328e-06
		J938	0	0	1	0	0	1	0	0	0	0	0	0	0	0	0	2	3.48328e-06
		V092	0	0	1	0	0	0	0	0	0	1	0	0	0	0	0	2	3.48328e-06
		R688	0	0	0	2	0	0	0	0	0	0	0	0	0	0	0	2	3.48328e-06
		O882	0	0	0	1	0	0	0	0	0	0	0	1	0	0	0	2	3.48328e-06
		K715	0	0	0	1	0	0	0	0	0	0	0	0	0	1	0	2	3.48328e-06
		D414	0	0	0	1	0	0	0	0	0	0	0	0	1	0	0	2	3.48328e-06
		Q289	0	0	0	1	0	1	0	0	0	0	0	0	0	0	0	2	3.48328e-06
		P291	0	0	0	1	0	0	0	1	0	0	0	0	0	0	0	2	3.48328e-06
		A179	0	0	0	1	0	0	0	0	0	0	1	0	0	0	0	2	3.48328e-06
		B222	0	0	0	1	0	1	0	0	0	0	0	0	0	0	0	2	3.48328e-06
		A300	0	0	0	1	0	0	1	0	0	0	0	0	0	0	0	2	3.48328e-06
		B59	0	0	0	1	0	0	0	0	0	0	0	0	0	1	0	2	3.48328e-06
		D891	0	0	0	1	0	0	0	1	0	0	0	0	0	0	0	2	3.48328e-06
		I959	0	0	0	1	0	0	0	0	0	1	0	0	0	0	0	2	3.48328e-06
		C700	0	0	0	1	0	0	0	0	1	0	0	0	0	0	0	2	3.48328e-06
		C778	0	0	0	1	0	0	0	1	0	0	0	0	0	0	0	2	3.48328e-06
		D434	0	0	0	1	0	0	0	0	0	0	0	0	0	0	1	2	3.48328e-06
		I601	0	0	0	1	0	0	0	0	0	0	1	0	0	0	0	2	3.48328e-06
		E02	0	0	0	1	0	1	0	0	0	0	0	0	0	0	0	2	3.48328e-06
		I501	0	0	0	1	0	0	0	1	0	0	0	0	0	0	0	2	3.48328e-06
		B232	0	0	0	1	0	0	0	0	0	0	0	0	0	0	1	2	3.48328e-06
		G959	0	0	0	1	0	0	0	0	1	0	0	0	0	0	0	2	3.48328e-06
		M352	0	0	0	1	0	0	0	0	0	0	0	0	0	0	1	2	3.48328e-06
		N210	0	0	0	1	0	0	0	0	0	0	0	1	0	0	0	2	3.48328e-06
		I775	0	0	0	1	0	0	0	0	1	0	0	0	0	0	0	2	3.48328e-06
		A165	0	0	0	1	0	0	0	0	0	0	0	1	0	0	0	2	3.48328e-06
		B552	0	0	0	1	0	0	0	0	0	1	0	0	0	0	0	2	3.48328e-06
		G98	0	0	0	1	0	0	0	0	0	0	0	0	1	0	0	2	3.48328e-06
		W850	0	0	0	1	0	0	0	0	0	0	0	0	0	0	1	2	3.48328e-06
		C688	0	0	0	1	0	0	0	0	0	1	0	0	0	0	0	2	3.48328e-06
		Q612	0	0	0	1	0	0	0	0	0	1	0	0	0	0	0	2	3.48328e-06
		D449	0	0	0	0	2	0	0	0	0	0	0	0	0	0	0	2	3.48328e-06
		Y119	0	0	0	0	1	0	1	0	0	0	0	0	0	0	0	2	3.48328e-06
		D391	0	0	0	0	1	0	1	0	0	0	0	0	0	0	0	2	3.48328e-06
		E038	0	0	0	0	1	0	0	0	1	0	0	0	0	0	0	2	3.48328e-06
		N738	0	0	0	0	1	0	0	1	0	0	0	0	0	0	0	2	3.48328e-06
		L022	0	0	0	0	1	0	0	0	0	0	1	0	0	0	0	2	3.48328e-06
		Q224	0	0	0	0	1	0	0	0	0	1	0	0	0	0	0	2	3.48328e-06
		A260	0	0	0	0	1	0	0	0	0	0	0	0	1	0	0	2	3.48328e-06
		B206	0	0	0	0	1	0	0	0	0	0	0	0	0	0	1	2	3.48328e-06
		D448	0	0	0	0	1	0	0	1	0	0	0	0	0	0	0	2	3.48328e-06
		N142	0	0	0	0	1	0	0	0	0	0	1	0	0	0	0	2	3.48328e-06
		B209	0	0	0	0	1	0	0	1	0	0	0	0	0	0	0	2	3.48328e-06
		X930	0	0	0	0	1	0	0	0	0	0	0	0	0	0	1	2	3.48328e-06
		J948	0	0	0	0	1	0	0	0	0	0	1	0	0	0	0	2	3.48328e-06
		Q330	0	0	0	0	1	0	0	0	1	0	0	0	0	0	0	2	3.48328e-06
		A427	0	0	0	0	1	0	1	0	0	0	0	0	0	0	0	2	3.48328e-06
		I070	0	0	0	0	1	0	0	1	0	0	0	0	0	0	0	2	3.48328e-06
		F069	0	0	0	0	1	1	0	0	0	0	0	0	0	0	0	2	3.48328e-06
		C400	0	0	0	0	1	0	0	0	1	0	0	0	0	0	0	2	3.48328e-06
		G310	0	0	0	0	1	0	0	0	0	0	0	0	0	1	0	2	3.48328e-06
		C183	0	0	0	0	1	0	1	0	0	0	0	0	0	0	0	2	3.48328e-06
		Y344	0	0	0	0	1	1	0	0	0	0	0	0	0	0	0	2	3.48328e-06
		D014	0	0	0	0	1	0	0	0	0	1	0	0	0	0	0	2	3.48328e-06
		E340	0	0	0	0	1	1	0	0	0	0	0	0	0	0	0	2	3.48328e-06
		X952	0	0	0	0	1	0	0	0	1	0	0	0	0	0	0	2	3.48328e-06
		C829	0	0	0	0	1	0	0	0	0	1	0	0	0	0	0	2	3.48328e-06
		M179	0	0	0	0	1	1	0	0	0	0	0	0	0	0	0	2	3.48328e-06
		I379	0	0	0	0	1	0	0	0	1	0	0	0	0	0	0	2	3.48328e-06
		V029	0	0	0	0	1	0	0	0	0	0	0	0	1	0	0	2	3.48328e-06
		C784	0	0	0	0	1	0	0	1	0	0	0	0	0	0	0	2	3.48328e-06
		K518	0	0	0	0	0	1	0	0	0	0	0	0	0	0	1	2	3.48328e-06
		C411	0	0	0	0	0	1	0	0	1	0	0	0	0	0	0	2	3.48328e-06
		L989	0	0	0	0	0	1	1	0	0	0	0	0	0	0	0	2	3.48328e-06
		N814	0	0	0	0	0	1	0	0	0	0	0	1	0	0	0	2	3.48328e-06
		V199	0	0	0	0	0	1	0	0	1	0	0	0	0	0	0	2	3.48328e-06
		I822	0	0	0	0	0	1	0	0	1	0	0	0	0	0	0	2	3.48328e-06
		Q618	0	0	0	0	0	1	0	0	0	0	0	1	0	0	0	2	3.48328e-06
		W697	0	0	0	0	0	1	0	0	1	0	0	0	0	0	0	2	3.48328e-06
		Q200	0	0	0	0	0	1	0	0	0	0	0	0	0	1	0	2	3.48328e-06
		I371	0	0	0	0	0	1	0	0	0	0	1	0	0	0	0	2	3.48328e-06
		W782	0	0	0	0	0	1	0	1	0	0	0	0	0	0	0	2	3.48328e-06
		Y872	0	0	0	0	0	1	0	0	1	0	0	0	0	0	0	2	3.48328e-06
		L024	0	0	0	0	0	1	0	0	0	0	1	0	0	0	0	2	3.48328e-06
		Q233	0	0	0	0	0	1	0	0	0	0	0	1	0	0	0	2	3.48328e-06
		B218	0	0	0	0	0	1	0	0	0	0	0	0	0	0	1	2	3.48328e-06
		D485	0	0	0	0	0	1	1	0	0	0	0	0	0	0	0	2	3.48328e-06
		C783	0	0	0	0	0	1	0	0	0	0	0	1	0	0	0	2	3.48328e-06
		C258	0	0	0	0	0	1	0	0	0	0	0	0	0	1	0	2	3.48328e-06
		Y579	0	0	0	0	0	1	0	0	0	0	0	0	0	1	0	2	3.48328e-06
		M103	0	0	0	0	0	1	0	0	0	0	1	0	0	0	0	2	3.48328e-06
		M509	0	0	0	0	0	1	1	0	0	0	0	0	0	0	0	2	3.48328e-06
		E040	0	0	0	0	0	1	0	0	0	0	0	1	0	0	0	2	3.48328e-06
		V274	0	0	0	0	0	1	0	0	0	0	0	0	1	0	0	2	3.48328e-06
		F29	0	0	0	0	0	1	1	0	0	0	0	0	0	0	0	2	3.48328e-06
		E169	0	0	0	0	0	1	0	0	0	0	0	0	1	0	0	2	3.48328e-06
		K401	0	0	0	0	0	1	0	0	0	0	0	0	1	0	0	2	3.48328e-06
		E010	0	0	0	0	0	1	0	0	0	0	0	0	1	0	0	2	3.48328e-06
		C768	0	0	0	0	0	0	1	0	0	0	1	0	0	0	0	2	3.48328e-06
		W148	0	0	0	0	0	0	1	0	1	0	0	0	0	0	0	2	3.48328e-06
		N009	0	0	0	0	0	0	1	0	0	0	0	0	0	1	0	2	3.48328e-06
		Y190	0	0	0	0	0	0	1	1	0	0	0	0	0	0	0	2	3.48328e-06
		D069	0	0	0	0	0	0	1	0	0	0	0	0	1	0	0	2	3.48328e-06
		D380	0	0	0	0	0	0	1	0	0	0	0	0	0	0	1	2	3.48328e-06
		D371	0	0	0	0	0	0	1	0	0	0	1	0	0	0	0	2	3.48328e-06
		G451	0	0	0	0	0	0	1	0	0	0	1	0	0	0	0	2	3.48328e-06
		A304	0	0	0	0	0	0	1	0	0	0	0	0	0	0	1	2	3.48328e-06
		D239	0	0	0	0	0	0	1	1	0	0	0	0	0	0	0	2	3.48328e-06
		W747	0	0	0	0	0	0	1	0	0	0	0	1	0	0	0	2	3.48328e-06
		K281	0	0	0	0	0	0	1	1	0	0	0	0	0	0	0	2	3.48328e-06
		K223	0	0	0	0	0	0	1	0	0	0	0	0	0	1	0	2	3.48328e-06
		I068	0	0	0	0	0	0	1	0	0	0	1	0	0	0	0	2	3.48328e-06
		I471	0	0	0	0	0	0	1	0	0	0	0	0	1	0	0	2	3.48328e-06
		M159	0	0	0	0	0	0	1	0	0	0	1	0	0	0	0	2	3.48328e-06
		C901	0	0	0	0	0	0	1	0	0	1	0	0	0	0	0	2	3.48328e-06
		D699	0	0	0	0	0	0	1	0	0	0	0	0	0	0	1	2	3.48328e-06
		M899	0	0	0	0	0	0	1	1	0	0	0	0	0	0	0	2	3.48328e-06
		C435	0	0	0	0	0	0	1	0	0	0	0	0	0	0	1	2	3.48328e-06
		F319	0	0	0	0	0	0	1	0	0	1	0	0	0	0	0	2	3.48328e-06
		I082	0	0	0	0	0	0	1	0	0	0	1	0	0	0	0	2	3.48328e-06
		N23	0	0	0	0	0	0	1	0	0	0	0	0	1	0	0	2	3.48328e-06
		D610	0	0	0	0	0	0	1	0	0	0	0	0	1	0	0	2	3.48328e-06
		W015	0	0	0	0	0	0	1	0	0	0	0	0	0	0	1	2	3.48328e-06
		D381	0	0	0	0	0	0	0	2	0	0	0	0	0	0	0	2	3.48328e-06
		V224	0	0	0	0	0	0	0	2	0	0	0	0	0	0	0	2	3.48328e-06
		G729	0	0	0	0	0	0	0	1	0	0	0	0	0	1	0	2	3.48328e-06
		D059	0	0	0	0	0	0	0	1	0	0	0	0	0	1	0	2	3.48328e-06
		D049	0	0	0	0	0	0	0	1	0	0	0	0	0	1	0	2	3.48328e-06
		Y575	0	0	0	0	0	0	0	1	0	0	1	0	0	0	0	2	3.48328e-06
		Y330	0	0	0	0	0	0	0	1	1	0	0	0	0	0	0	2	3.48328e-06
		C438	0	0	0	0	0	0	0	1	0	0	0	1	0	0	0	2	3.48328e-06
		E749	0	0	0	0	0	0	0	1	0	0	0	0	1	0	0	2	3.48328e-06
		X934	0	0	0	0	0	0	0	1	0	0	0	1	0	0	0	2	3.48328e-06
		M622	0	0	0	0	0	0	0	1	0	0	0	0	0	0	1	2	3.48328e-06
		K520	0	0	0	0	0	0	0	1	0	0	0	0	0	0	1	2	3.48328e-06
		A188	0	0	0	0	0	0	0	1	0	0	0	0	0	1	0	2	3.48328e-06
		I029	0	0	0	0	0	0	0	1	1	0	0	0	0	0	0	2	3.48328e-06
		C150	0	0	0	0	0	0	0	1	0	1	0	0	0	0	0	2	3.48328e-06
		Q281	0	0	0	0	0	0	0	1	1	0	0	0	0	0	0	2	3.48328e-06
		Q878	0	0	0	0	0	0	0	1	0	0	0	1	0	0	0	2	3.48328e-06
		X450	0	0	0	0	0	0	0	1	0	0	0	0	1	0	0	2	3.48328e-06
		J930	0	0	0	0	0	0	0	1	0	0	0	0	1	0	0	2	3.48328e-06
		X099	0	0	0	0	0	0	0	1	0	0	0	0	0	1	0	2	3.48328e-06
		K603	0	0	0	0	0	0	0	1	0	0	0	0	0	0	1	2	3.48328e-06
		O152	0	0	0	0	0	0	0	1	0	1	0	0	0	0	0	2	3.48328e-06
		X202	0	0	0	0	0	0	0	1	0	0	1	0	0	0	0	2	3.48328e-06
		X650	0	0	0	0	0	0	0	1	0	0	0	1	0	0	0	2	3.48328e-06
		F148	0	0	0	0	0	0	0	1	0	0	0	1	0	0	0	2	3.48328e-06
		I401	0	0	0	0	0	0	0	1	0	0	0	1	0	0	0	2	3.48328e-06
		W866	0	0	0	0	0	0	0	1	1	0	0	0	0	0	0	2	3.48328e-06
		X232	0	0	0	0	0	0	0	1	0	1	0	0	0	0	0	2	3.48328e-06
		C574	0	0	0	0	0	0	0	1	0	1	0	0	0	0	0	2	3.48328e-06
		R008	0	0	0	0	0	0	0	0	1	0	1	0	0	0	0	2	3.48328e-06
		K623	0	0	0	0	0	0	0	0	1	1	0	0	0	0	0	2	3.48328e-06
		I871	0	0	0	0	0	0	0	0	1	0	0	1	0	0	0	2	3.48328e-06
		G808	0	0	0	0	0	0	0	0	1	1	0	0	0	0	0	2	3.48328e-06
		W864	0	0	0	0	0	0	0	0	1	0	0	0	1	0	0	2	3.48328e-06
		P290	0	0	0	0	0	0	0	0	1	0	1	0	0	0	0	2	3.48328e-06
		K521	0	0	0	0	0	0	0	0	1	1	0	0	0	0	0	2	3.48328e-06
		I899	0	0	0	0	0	0	0	0	1	0	0	0	0	0	1	2	3.48328e-06
		V244	0	0	0	0	0	0	0	0	1	0	0	0	0	1	0	2	3.48328e-06
		C254	0	0	0	0	0	0	0	0	1	0	0	0	0	1	0	2	3.48328e-06
		K400	0	0	0	0	0	0	0	0	1	0	0	0	0	1	0	2	3.48328e-06
		Q019	0	0	0	0	0	0	0	0	1	1	0	0	0	0	0	2	3.48328e-06
		J851	0	0	0	0	0	0	0	0	1	0	1	0	0	0	0	2	3.48328e-06
		C714	0	0	0	0	0	0	0	0	1	0	0	1	0	0	0	2	3.48328e-06
		C450	0	0	0	0	0	0	0	0	1	0	0	1	0	0	0	2	3.48328e-06
		I079	0	0	0	0	0	0	0	0	1	1	0	0	0	0	0	2	3.48328e-06
		V102	0	0	0	0	0	0	0	0	1	1	0	0	0	0	0	2	3.48328e-06
		Y210	0	0	0	0	0	0	0	0	1	0	0	0	0	0	1	2	3.48328e-06
		B028	0	0	0	0	0	0	0	0	1	0	0	0	0	1	0	2	3.48328e-06
		E700	0	0	0	0	0	0	0	0	1	1	0	0	0	0	0	2	3.48328e-06
		M303	0	0	0	0	0	0	0	0	1	0	0	0	0	0	1	2	3.48328e-06
		W170	0	0	0	0	0	0	0	0	1	0	0	0	0	0	1	2	3.48328e-06
		C241	0	0	0	0	0	0	0	0	1	0	0	0	1	0	0	2	3.48328e-06
		Q242	0	0	0	0	0	0	0	0	0	2	0	0	0	0	0	2	3.48328e-06
		F412	0	0	0	0	0	0	0	0	0	2	0	0	0	0	0	2	3.48328e-06
		F122	0	0	0	0	0	0	0	0	0	2	0	0	0	0	0	2	3.48328e-06
		I611	0	0	0	0	0	0	0	0	0	2	0	0	0	0	0	2	3.48328e-06
		M518	0	0	0	0	0	0	0	0	0	1	0	0	1	0	0	2	3.48328e-06
		K567	0	0	0	0	0	0	0	0	0	1	0	0	0	1	0	2	3.48328e-06
		X958	0	0	0	0	0	0	0	0	0	1	1	0	0	0	0	2	3.48328e-06
		K280	0	0	0	0	0	0	0	0	0	1	0	0	1	0	0	2	3.48328e-06
		G112	0	0	0	0	0	0	0	0	0	1	1	0	0	0	0	2	3.48328e-06
		X338	0	0	0	0	0	0	0	0	0	1	0	0	1	0	0	2	3.48328e-06
		G800	0	0	0	0	0	0	0	0	0	1	0	0	0	0	1	2	3.48328e-06
		N140	0	0	0	0	0	0	0	0	0	1	0	0	0	1	0	2	3.48328e-06
		P369	0	0	0	0	0	0	0	0	0	1	0	0	0	0	1	2	3.48328e-06
		K909	0	0	0	0	0	0	0	0	0	1	0	0	0	1	0	2	3.48328e-06
		L029	0	0	0	0	0	0	0	0	0	1	1	0	0	0	0	2	3.48328e-06
		D733	0	0	0	0	0	0	0	0	0	1	0	0	0	1	0	2	3.48328e-06
		K451	0	0	0	0	0	0	0	0	0	1	0	0	1	0	0	2	3.48328e-06
		N251	0	0	0	0	0	0	0	0	0	1	1	0	0	0	0	2	3.48328e-06
		I360	0	0	0	0	0	0	0	0	0	1	0	1	0	0	0	2	3.48328e-06
		I604	0	0	0	0	0	0	0	0	0	0	2	0	0	0	0	2	3.48328e-06
		F159	0	0	0	0	0	0	0	0	0	0	2	0	0	0	0	2	3.48328e-06
		M629	0	0	0	0	0	0	0	0	0	0	2	0	0	0	0	2	3.48328e-06
		I820	0	0	0	0	0	0	0	0	0	0	1	1	0	0	0	2	3.48328e-06
		C108	0	0	0	0	0	0	0	0	0	0	1	0	0	1	0	2	3.48328e-06
		Y128	0	0	0	0	0	0	0	0	0	0	1	1	0	0	0	2	3.48328e-06
		C211	0	0	0	0	0	0	0	0	0	0	1	0	1	0	0	2	3.48328e-06
		E849	0	0	0	0	0	0	0	0	0	0	1	1	0	0	0	2	3.48328e-06
		J661	0	0	0	0	0	0	0	0	0	0	1	0	0	1	0	2	3.48328e-06
		A152	0	0	0	0	0	0	0	0	0	0	1	1	0	0	0	2	3.48328e-06
		C408	0	0	0	0	0	0	0	0	0	0	1	0	1	0	0	2	3.48328e-06
		N136	0	0	0	0	0	0	0	0	0	0	1	0	1	0	0	2	3.48328e-06
		C902	0	0	0	0	0	0	0	0	0	0	1	0	0	1	0	2	3.48328e-06
		W867	0	0	0	0	0	0	0	0	0	0	1	0	0	0	1	2	3.48328e-06
		D698	0	0	0	0	0	0	0	0	0	0	1	0	0	0	1	2	3.48328e-06
		C118	0	0	0	0	0	0	0	0	0	0	0	2	0	0	0	2	3.48328e-06
		G609	0	0	0	0	0	0	0	0	0	0	0	2	0	0	0	2	3.48328e-06
		G219	0	0	0	0	0	0	0	0	0	0	0	1	0	1	0	2	3.48328e-06
		C448	0	0	0	0	0	0	0	0	0	0	0	1	1	0	0	2	3.48328e-06
		D593	0	0	0	0	0	0	0	0	0	0	0	1	0	0	1	2	3.48328e-06
		L409	0	0	0	0	0	0	0	0	0	0	0	1	0	0	1	2	3.48328e-06
		C252	0	0	0	0	0	0	0	0	0	0	0	1	1	0	0	2	3.48328e-06
		C163	0	0	0	0	0	0	0	0	0	0	0	1	1	0	0	2	3.48328e-06
		C33	0	0	0	0	0	0	0	0	0	0	0	1	0	1	0	2	3.48328e-06
		N110	0	0	0	0	0	0	0	0	0	0	0	1	1	0	0	2	3.48328e-06
		W860	0	0	0	0	0	0	0	0	0	0	0	1	0	0	1	2	3.48328e-06
		O13	0	0	0	0	0	0	0	0	0	0	0	0	2	0	0	2	3.48328e-06
		G402	0	0	0	0	0	0	0	0	0	0	0	0	2	0	0	2	3.48328e-06
		J432	0	0	0	0	0	0	0	0	0	0	0	0	2	0	0	2	3.48328e-06
		C446	0	0	0	0	0	0	0	0	0	0	0	0	2	0	0	2	3.48328e-06
		D432	0	0	0	0	0	0	0	0	0	0	0	0	2	0	0	2	3.48328e-06
		A488	0	0	0	0	0	0	0	0	0	0	0	0	1	1	0	2	3.48328e-06
		V445	0	0	0	0	0	0	0	0	0	0	0	0	1	1	0	2	3.48328e-06
		X425	0	0	0	0	0	0	0	0	0	0	0	0	1	0	1	2	3.48328e-06
		N141	0	0	0	0	0	0	0	0	0	0	0	0	1	1	0	2	3.48328e-06
		I511	0	0	0	0	0	0	0	0	0	0	0	0	1	0	1	2	3.48328e-06
		F141	0	0	0	0	0	0	0	0	0	0	0	0	1	1	0	2	3.48328e-06
		F059	0	0	0	0	0	0	0	0	0	0	0	0	1	0	1	2	3.48328e-06
		M471	0	0	0	0	0	0	0	0	0	0	0	0	1	1	0	2	3.48328e-06
		C759	0	0	0	0	0	0	0	0	0	0	0	0	1	0	1	2	3.48328e-06
		P008	0	0	0	0	0	0	0	0	0	0	0	0	0	2	0	2	3.48328e-06
		A480	0	0	0	0	0	0	0	0	0	0	0	0	0	2	0	2	3.48328e-06
		H709	0	0	0	0	0	0	0	0	0	0	0	0	0	1	1	2	3.48328e-06
		Q252	0	0	0	0	0	0	0	0	0	0	0	0	0	1	1	2	3.48328e-06
		E078	0	0	0	0	0	0	0	0	0	0	0	0	0	1	1	2	3.48328e-06
		E728	0	0	0	0	0	0	0	0	0	0	0	0	0	1	1	2	3.48328e-06
		W876	0	0	0	0	0	0	0	0	0	0	0	0	0	0	2	2	3.48328e-06
		E509	0	0	0	0	0	0	0	0	0	0	0	0	0	0	2	2	3.48328e-06
		V879	0	0	0	0	0	0	0	0	0	0	0	0	0	0	2	2	3.48328e-06
		N824	1	0	0	0	0	0	0	0	0	0	0	0	0	0	0	1	1.74164e-06
		W340	1	0	0	0	0	0	0	0	0	0	0	0	0	0	0	1	1.74164e-06
		O992	1	0	0	0	0	0	0	0	0	0	0	0	0	0	0	1	1.74164e-06
		F988	1	0	0	0	0	0	0	0	0	0	0	0	0	0	0	1	1.74164e-06
		C728	1	0	0	0	0	0	0	0	0	0	0	0	0	0	0	1	1.74164e-06
		M889	1	0	0	0	0	0	0	0	0	0	0	0	0	0	0	1	1.74164e-06
		W738	1	0	0	0	0	0	0	0	0	0	0	0	0	0	0	1	1.74164e-06
		O723	1	0	0	0	0	0	0	0	0	0	0	0	0	0	0	1	1.74164e-06
		I372	1	0	0	0	0	0	0	0	0	0	0	0	0	0	0	1	1.74164e-06
		C675	1	0	0	0	0	0	0	0	0	0	0	0	0	0	0	1	1.74164e-06
		P292	1	0	0	0	0	0	0	0	0	0	0	0	0	0	0	1	1.74164e-06
		K311	1	0	0	0	0	0	0	0	0	0	0	0	0	0	0	1	1.74164e-06
		W126	1	0	0	0	0	0	0	0	0	0	0	0	0	0	0	1	1.74164e-06
		G721	1	0	0	0	0	0	0	0	0	0	0	0	0	0	0	1	1.74164e-06
		Y218	1	0	0	0	0	0	0	0	0	0	0	0	0	0	0	1	1.74164e-06
		W309	1	0	0	0	0	0	0	0	0	0	0	0	0	0	0	1	1.74164e-06
		X120	1	0	0	0	0	0	0	0	0	0	0	0	0	0	0	1	1.74164e-06
		K262	1	0	0	0	0	0	0	0	0	0	0	0	0	0	0	1	1.74164e-06
		D369	1	0	0	0	0	0	0	0	0	0	0	0	0	0	0	1	1.74164e-06
		W949	1	0	0	0	0	0	0	0	0	0	0	0	0	0	0	1	1.74164e-06
		Q401	1	0	0	0	0	0	0	0	0	0	0	0	0	0	0	1	1.74164e-06
		F170	1	0	0	0	0	0	0	0	0	0	0	0	0	0	0	1	1.74164e-06
		N72	1	0	0	0	0	0	0	0	0	0	0	0	0	0	0	1	1.74164e-06
		K450	1	0	0	0	0	0	0	0	0	0	0	0	0	0	0	1	1.74164e-06
		A161	1	0	0	0	0	0	0	0	0	0	0	0	0	0	0	1	1.74164e-06
		G831	1	0	0	0	0	0	0	0	0	0	0	0	0	0	0	1	1.74164e-06
		B679	1	0	0	0	0	0	0	0	0	0	0	0	0	0	0	1	1.74164e-06
		K510	1	0	0	0	0	0	0	0	0	0	0	0	0	0	0	1	1.74164e-06
		V251	1	0	0	0	0	0	0	0	0	0	0	0	0	0	0	1	1.74164e-06
		L080	1	0	0	0	0	0	0	0	0	0	0	0	0	0	0	1	1.74164e-06
		V890	1	0	0	0	0	0	0	0	0	0	0	0	0	0	0	1	1.74164e-06
		D642	1	0	0	0	0	0	0	0	0	0	0	0	0	0	0	1	1.74164e-06
		Q255	1	0	0	0	0	0	0	0	0	0	0	0	0	0	0	1	1.74164e-06
		C089	1	0	0	0	0	0	0	0	0	0	0	0	0	0	0	1	1.74164e-06
		I461	1	0	0	0	0	0	0	0	0	0	0	0	0	0	0	1	1.74164e-06
		D470	1	0	0	0	0	0	0	0	0	0	0	0	0	0	0	1	1.74164e-06
		I673	1	0	0	0	0	0	0	0	0	0	0	0	0	0	0	1	1.74164e-06
		A390	1	0	0	0	0	0	0	0	0	0	0	0	0	0	0	1	1.74164e-06
		E881	1	0	0	0	0	0	0	0	0	0	0	0	0	0	0	1	1.74164e-06
		V911	1	0	0	0	0	0	0	0	0	0	0	0	0	0	0	1	1.74164e-06
		D090	1	0	0	0	0	0	0	0	0	0	0	0	0	0	0	1	1.74164e-06
		Q340	1	0	0	0	0	0	0	0	0	0	0	0	0	0	0	1	1.74164e-06
		Y818	0	1	0	0	0	0	0	0	0	0	0	0	0	0	0	1	1.74164e-06
		B519	0	1	0	0	0	0	0	0	0	0	0	0	0	0	0	1	1.74164e-06
		W544	0	1	0	0	0	0	0	0	0	0	0	0	0	0	0	1	1.74164e-06
		I99	0	1	0	0	0	0	0	0	0	0	0	0	0	0	0	1	1.74164e-06
		F919	0	1	0	0	0	0	0	0	0	0	0	0	0	0	0	1	1.74164e-06
		K622	0	1	0	0	0	0	0	0	0	0	0	0	0	0	0	1	1.74164e-06
		H570	0	1	0	0	0	0	0	0	0	0	0	0	0	0	0	1	1.74164e-06
		K824	0	1	0	0	0	0	0	0	0	0	0	0	0	0	0	1	1.74164e-06
		F500	0	1	0	0	0	0	0	0	0	0	0	0	0	0	0	1	1.74164e-06
		G407	0	1	0	0	0	0	0	0	0	0	0	0	0	0	0	1	1.74164e-06
		V221	0	1	0	0	0	0	0	0	0	0	0	0	0	0	0	1	1.74164e-06
		J61	0	1	0	0	0	0	0	0	0	0	0	0	0	0	0	1	1.74164e-06
		W700	0	1	0	0	0	0	0	0	0	0	0	0	0	0	0	1	1.74164e-06
		F251	0	1	0	0	0	0	0	0	0	0	0	0	0	0	0	1	1.74164e-06
		I670	0	1	0	0	0	0	0	0	0	0	0	0	0	0	0	1	1.74164e-06
		W110	0	1	0	0	0	0	0	0	0	0	0	0	0	0	0	1	1.74164e-06
		M800	0	1	0	0	0	0	0	0	0	0	0	0	0	0	0	1	1.74164e-06
		W682	0	1	0	0	0	0	0	0	0	0	0	0	0	0	0	1	1.74164e-06
		V689	0	1	0	0	0	0	0	0	0	0	0	0	0	0	0	1	1.74164e-06
		K904	0	1	0	0	0	0	0	0	0	0	0	0	0	0	0	1	1.74164e-06
		D223	0	1	0	0	0	0	0	0	0	0	0	0	0	0	0	1	1.74164e-06
		M722	0	1	0	0	0	0	0	0	0	0	0	0	0	0	0	1	1.74164e-06
		M802	0	1	0	0	0	0	0	0	0	0	0	0	0	0	0	1	1.74164e-06
		F220	0	1	0	0	0	0	0	0	0	0	0	0	0	0	0	1	1.74164e-06
		V049	0	1	0	0	0	0	0	0	0	0	0	0	0	0	0	1	1.74164e-06
		G255	0	1	0	0	0	0	0	0	0	0	0	0	0	0	0	1	1.74164e-06
		E739	0	1	0	0	0	0	0	0	0	0	0	0	0	0	0	1	1.74164e-06
		W559	0	1	0	0	0	0	0	0	0	0	0	0	0	0	0	1	1.74164e-06
		C436	0	1	0	0	0	0	0	0	0	0	0	0	0	0	0	1	1.74164e-06
		G913	0	1	0	0	0	0	0	0	0	0	0	0	0	0	0	1	1.74164e-06
		B085	0	1	0	0	0	0	0	0	0	0	0	0	0	0	0	1	1.74164e-06
		R571	0	1	0	0	0	0	0	0	0	0	0	0	0	0	0	1	1.74164e-06
		D447	0	1	0	0	0	0	0	0	0	0	0	0	0	0	0	1	1.74164e-06
		C889	0	1	0	0	0	0	0	0	0	0	0	0	0	0	0	1	1.74164e-06
		C764	0	1	0	0	0	0	0	0	0	0	0	0	0	0	0	1	1.74164e-06
		N921	0	1	0	0	0	0	0	0	0	0	0	0	0	0	0	1	1.74164e-06
		E750	0	1	0	0	0	0	0	0	0	0	0	0	0	0	0	1	1.74164e-06
		D640	0	1	0	0	0	0	0	0	0	0	0	0	0	0	0	1	1.74164e-06
		X832	0	1	0	0	0	0	0	0	0	0	0	0	0	0	0	1	1.74164e-06
		Y150	0	0	1	0	0	0	0	0	0	0	0	0	0	0	0	1	1.74164e-06
		N61	0	0	1	0	0	0	0	0	0	0	0	0	0	0	0	1	1.74164e-06
		M818	0	0	1	0	0	0	0	0	0	0	0	0	0	0	0	1	1.74164e-06
		N482	0	0	1	0	0	0	0	0	0	0	0	0	0	0	0	1	1.74164e-06
		W059	0	0	1	0	0	0	0	0	0	0	0	0	0	0	0	1	1.74164e-06
		K263	0	0	1	0	0	0	0	0	0	0	0	0	0	0	0	1	1.74164e-06
		G588	0	0	1	0	0	0	0	0	0	0	0	0	0	0	0	1	1.74164e-06
		Q338	0	0	1	0	0	0	0	0	0	0	0	0	0	0	0	1	1.74164e-06
		I848	0	0	1	0	0	0	0	0	0	0	0	0	0	0	0	1	1.74164e-06
		E065	0	0	1	0	0	0	0	0	0	0	0	0	0	0	0	1	1.74164e-06
		I870	0	0	1	0	0	0	0	0	0	0	0	0	0	0	0	1	1.74164e-06
		M852	0	0	1	0	0	0	0	0	0	0	0	0	0	0	0	1	1.74164e-06
		K629	0	0	1	0	0	0	0	0	0	0	0	0	0	0	0	1	1.74164e-06
		M803	0	0	1	0	0	0	0	0	0	0	0	0	0	0	0	1	1.74164e-06
		C459	0	0	1	0	0	0	0	0	0	0	0	0	0	0	0	1	1.74164e-06
		W775	0	0	1	0	0	0	0	0	0	0	0	0	0	0	0	1	1.74164e-06
		A428	0	0	1	0	0	0	0	0	0	0	0	0	0	0	0	1	1.74164e-06
		D480	0	0	1	0	0	0	0	0	0	0	0	0	0	0	0	1	1.74164e-06
		A520	0	0	1	0	0	0	0	0	0	0	0	0	0	0	0	1	1.74164e-06
		D372	0	0	1	0	0	0	0	0	0	0	0	0	0	0	0	1	1.74164e-06
		N050	0	0	1	0	0	0	0	0	0	0	0	0	0	0	0	1	1.74164e-06
		Y000	0	0	1	0	0	0	0	0	0	0	0	0	0	0	0	1	1.74164e-06
		B770	0	0	1	0	0	0	0	0	0	0	0	0	0	0	0	1	1.74164e-06
		E839	0	0	1	0	0	0	0	0	0	0	0	0	0	0	0	1	1.74164e-06
		A081	0	0	1	0	0	0	0	0	0	0	0	0	0	0	0	1	1.74164e-06
		G822	0	0	1	0	0	0	0	0	0	0	0	0	0	0	0	1	1.74164e-06
		M939	0	0	1	0	0	0	0	0	0	0	0	0	0	0	0	1	1.74164e-06
		Q043	0	0	1	0	0	0	0	0	0	0	0	0	0	0	0	1	1.74164e-06
		F312	0	0	1	0	0	0	0	0	0	0	0	0	0	0	0	1	1.74164e-06
		W319	0	0	1	0	0	0	0	0	0	0	0	0	0	0	0	1	1.74164e-06
		A301	0	0	1	0	0	0	0	0	0	0	0	0	0	0	0	1	1.74164e-06
		Y238	0	0	1	0	0	0	0	0	0	0	0	0	0	0	0	1	1.74164e-06
		Y312	0	0	1	0	0	0	0	0	0	0	0	0	0	0	0	1	1.74164e-06
		W844	0	0	1	0	0	0	0	0	0	0	0	0	0	0	0	1	1.74164e-06
		X549	0	0	1	0	0	0	0	0	0	0	0	0	0	0	0	1	1.74164e-06
		Y032	0	0	1	0	0	0	0	0	0	0	0	0	0	0	0	1	1.74164e-06
		X010	0	0	1	0	0	0	0	0	0	0	0	0	0	0	0	1	1.74164e-06
		K289	0	0	1	0	0	0	0	0	0	0	0	0	0	0	0	1	1.74164e-06
		J322	0	0	1	0	0	0	0	0	0	0	0	0	0	0	0	1	1.74164e-06
		E210	0	0	1	0	0	0	0	0	0	0	0	0	0	0	0	1	1.74164e-06
		Y044	0	0	1	0	0	0	0	0	0	0	0	0	0	0	0	1	1.74164e-06
		D849	0	0	1	0	0	0	0	0	0	0	0	0	0	0	0	1	1.74164e-06
		C068	0	0	1	0	0	0	0	0	0	0	0	0	0	0	0	1	1.74164e-06
		D181	0	0	1	0	0	0	0	0	0	0	0	0	0	0	0	1	1.74164e-06
		C185	0	0	1	0	0	0	0	0	0	0	0	0	0	0	0	1	1.74164e-06
		D869	0	0	1	0	0	0	0	0	0	0	0	0	0	0	0	1	1.74164e-06
		V196	0	0	1	0	0	0	0	0	0	0	0	0	0	0	0	1	1.74164e-06
		G212	0	0	1	0	0	0	0	0	0	0	0	0	0	0	0	1	1.74164e-06
		W236	0	0	0	1	0	0	0	0	0	0	0	0	0	0	0	1	1.74164e-06
		B509	0	0	0	1	0	0	0	0	0	0	0	0	0	0	0	1	1.74164e-06
		B160	0	0	0	1	0	0	0	0	0	0	0	0	0	0	0	1	1.74164e-06
		I708	0	0	0	1	0	0	0	0	0	0	0	0	0	0	0	1	1.74164e-06
		W845	0	0	0	1	0	0	0	0	0	0	0	0	0	0	0	1	1.74164e-06
		C927	0	0	0	1	0	0	0	0	0	0	0	0	0	0	0	1	1.74164e-06
		D330	0	0	0	1	0	0	0	0	0	0	0	0	0	0	0	1	1.74164e-06
		G373	0	0	0	1	0	0	0	0	0	0	0	0	0	0	0	1	1.74164e-06
		X339	0	0	0	1	0	0	0	0	0	0	0	0	0	0	0	1	1.74164e-06
		B211	0	0	0	1	0	0	0	0	0	0	0	0	0	0	0	1	1.74164e-06
		Q054	0	0	0	1	0	0	0	0	0	0	0	0	0	0	0	1	1.74164e-06
		C492	0	0	0	1	0	0	0	0	0	0	0	0	0	0	0	1	1.74164e-06
		E740	0	0	0	1	0	0	0	0	0	0	0	0	0	0	0	1	1.74164e-06
		Q759	0	0	0	1	0	0	0	0	0	0	0	0	0	0	0	1	1.74164e-06
		Y050	0	0	0	1	0	0	0	0	0	0	0	0	0	0	0	1	1.74164e-06
		N359	0	0	0	1	0	0	0	0	0	0	0	0	0	0	0	1	1.74164e-06
		F781	0	0	0	1	0	0	0	0	0	0	0	0	0	0	0	1	1.74164e-06
		C403	0	0	0	1	0	0	0	0	0	0	0	0	0	0	0	1	1.74164e-06
		G619	0	0	0	1	0	0	0	0	0	0	0	0	0	0	0	1	1.74164e-06
		E328	0	0	0	1	0	0	0	0	0	0	0	0	0	0	0	1	1.74164e-06
		B500	0	0	0	1	0	0	0	0	0	0	0	0	0	0	0	1	1.74164e-06
		E538	0	0	0	1	0	0	0	0	0	0	0	0	0	0	0	1	1.74164e-06
		X000	0	0	0	1	0	0	0	0	0	0	0	0	0	0	0	1	1.74164e-06
		O16	0	0	0	1	0	0	0	0	0	0	0	0	0	0	0	1	1.74164e-06
		L108	0	0	0	1	0	0	0	0	0	0	0	0	0	0	0	1	1.74164e-06
		W851	0	0	0	1	0	0	0	0	0	0	0	0	0	0	0	1	1.74164e-06
		N321	0	0	0	1	0	0	0	0	0	0	0	0	0	0	0	1	1.74164e-06
		K122	0	0	0	1	0	0	0	0	0	0	0	0	0	0	0	1	1.74164e-06
		F443	0	0	0	1	0	0	0	0	0	0	0	0	0	0	0	1	1.74164e-06
		X080	0	0	0	1	0	0	0	0	0	0	0	0	0	0	0	1	1.74164e-06
		C850	0	0	0	1	0	0	0	0	0	0	0	0	0	0	0	1	1.74164e-06
		Q790	0	0	0	1	0	0	0	0	0	0	0	0	0	0	0	1	1.74164e-06
		N820	0	0	0	1	0	0	0	0	0	0	0	0	0	0	0	1	1.74164e-06
		Q231	0	0	0	1	0	0	0	0	0	0	0	0	0	0	0	1	1.74164e-06
		K900	0	0	0	1	0	0	0	0	0	0	0	0	0	0	0	1	1.74164e-06
		E160	0	0	0	1	0	0	0	0	0	0	0	0	0	0	0	1	1.74164e-06
		M418	0	0	0	1	0	0	0	0	0	0	0	0	0	0	0	1	1.74164e-06
		M478	0	0	0	1	0	0	0	0	0	0	0	0	0	0	0	1	1.74164e-06
		G249	0	0	0	1	0	0	0	0	0	0	0	0	0	0	0	1	1.74164e-06
		W839	0	0	0	1	0	0	0	0	0	0	0	0	0	0	0	1	1.74164e-06
		C251	0	0	0	0	1	0	0	0	0	0	0	0	0	0	0	1	1.74164e-06
		W648	0	0	0	0	1	0	0	0	0	0	0	0	0	0	0	1	1.74164e-06
		E248	0	0	0	0	1	0	0	0	0	0	0	0	0	0	0	1	1.74164e-06
		B650	0	0	0	0	1	0	0	0	0	0	0	0	0	0	0	1	1.74164e-06
		O151	0	0	0	0	1	0	0	0	0	0	0	0	0	0	0	1	1.74164e-06
		E807	0	0	0	0	1	0	0	0	0	0	0	0	0	0	0	1	1.74164e-06
		B779	0	0	0	0	1	0	0	0	0	0	0	0	0	0	0	1	1.74164e-06
		X474	0	0	0	0	1	0	0	0	0	0	0	0	0	0	0	1	1.74164e-06
		X208	0	0	0	0	1	0	0	0	0	0	0	0	0	0	0	1	1.74164e-06
		F051	0	0	0	0	1	0	0	0	0	0	0	0	0	0	0	1	1.74164e-06
		C792	0	0	0	0	1	0	0	0	0	0	0	0	0	0	0	1	1.74164e-06
		F163	0	0	0	0	1	0	0	0	0	0	0	0	0	0	0	1	1.74164e-06
		L033	0	0	0	0	1	0	0	0	0	0	0	0	0	0	0	1	1.74164e-06
		N134	0	0	0	0	1	0	0	0	0	0	0	0	0	0	0	1	1.74164e-06
		Q605	0	0	0	0	1	0	0	0	0	0	0	0	0	0	0	1	1.74164e-06
		E743	0	0	0	0	1	0	0	0	0	0	0	0	0	0	0	1	1.74164e-06
		N719	0	0	0	0	1	0	0	0	0	0	0	0	0	0	0	1	1.74164e-06
		Q632	0	0	0	0	1	0	0	0	0	0	0	0	0	0	0	1	1.74164e-06
		X449	0	0	0	0	1	0	0	0	0	0	0	0	0	0	0	1	1.74164e-06
		X970	0	0	0	0	1	0	0	0	0	0	0	0	0	0	0	1	1.74164e-06
		N422	0	0	0	0	1	0	0	0	0	0	0	0	0	0	0	1	1.74164e-06
		I490	0	0	0	0	1	0	0	0	0	0	0	0	0	0	0	1	1.74164e-06
		E033	0	0	0	0	1	0	0	0	0	0	0	0	0	0	0	1	1.74164e-06
		F320	0	0	0	0	1	0	0	0	0	0	0	0	0	0	0	1	1.74164e-06
		V239	0	0	0	0	1	0	0	0	0	0	0	0	0	0	0	1	1.74164e-06
		I072	0	0	0	0	1	0	0	0	0	0	0	0	0	0	0	1	1.74164e-06
		V265	0	0	0	0	1	0	0	0	0	0	0	0	0	0	0	1	1.74164e-06
		B378	0	0	0	0	1	0	0	0	0	0	0	0	0	0	0	1	1.74164e-06
		W670	0	0	0	0	1	0	0	0	0	0	0	0	0	0	0	1	1.74164e-06
		Q640	0	0	0	0	1	0	0	0	0	0	0	0	0	0	0	1	1.74164e-06
		Q244	0	0	0	0	1	0	0	0	0	0	0	0	0	0	0	1	1.74164e-06
		Y288	0	0	0	0	1	0	0	0	0	0	0	0	0	0	0	1	1.74164e-06
		C224	0	0	0	0	1	0	0	0	0	0	0	0	0	0	0	1	1.74164e-06
		P240	0	0	0	0	1	0	0	0	0	0	0	0	0	0	0	1	1.74164e-06
		X500	0	0	0	0	1	0	0	0	0	0	0	0	0	0	0	1	1.74164e-06
		Q349	0	0	0	0	1	0	0	0	0	0	0	0	0	0	0	1	1.74164e-06
		X419	0	0	0	0	1	0	0	0	0	0	0	0	0	0	0	1	1.74164e-06
		F169	0	0	0	0	1	0	0	0	0	0	0	0	0	0	0	1	1.74164e-06
		I801	0	0	0	0	1	0	0	0	0	0	0	0	0	0	0	1	1.74164e-06
		K823	0	0	0	0	1	0	0	0	0	0	0	0	0	0	0	1	1.74164e-06
		F710	0	0	0	0	1	0	0	0	0	0	0	0	0	0	0	1	1.74164e-06
		E271	0	0	0	0	1	0	0	0	0	0	0	0	0	0	0	1	1.74164e-06
		O11	0	0	0	0	1	0	0	0	0	0	0	0	0	0	0	1	1.74164e-06
		K500	0	0	0	0	1	0	0	0	0	0	0	0	0	0	0	1	1.74164e-06
		K742	0	0	0	0	1	0	0	0	0	0	0	0	0	0	0	1	1.74164e-06
		M068	0	0	0	0	1	0	0	0	0	0	0	0	0	0	0	1	1.74164e-06
		L509	0	0	0	0	1	0	0	0	0	0	0	0	0	0	0	1	1.74164e-06
		C447	0	0	0	0	1	0	0	0	0	0	0	0	0	0	0	1	1.74164e-06
		K419	0	0	0	0	1	0	0	0	0	0	0	0	0	0	0	1	1.74164e-06
		L059	0	0	0	0	1	0	0	0	0	0	0	0	0	0	0	1	1.74164e-06
		V124	0	0	0	0	1	0	0	0	0	0	0	0	0	0	0	1	1.74164e-06
		Y339	0	0	0	0	1	0	0	0	0	0	0	0	0	0	0	1	1.74164e-06
		A811	0	0	0	0	1	0	0	0	0	0	0	0	0	0	0	1	1.74164e-06
		Q243	0	0	0	0	1	0	0	0	0	0	0	0	0	0	0	1	1.74164e-06
		J312	0	0	0	0	1	0	0	0	0	0	0	0	0	0	0	1	1.74164e-06
		V039	0	0	0	0	1	0	0	0	0	0	0	0	0	0	0	1	1.74164e-06
		E164	0	0	0	0	1	0	0	0	0	0	0	0	0	0	0	1	1.74164e-06
		A029	0	0	0	0	1	0	0	0	0	0	0	0	0	0	0	1	1.74164e-06
		K440	0	0	0	0	1	0	0	0	0	0	0	0	0	0	0	1	1.74164e-06
		J940	0	0	0	0	1	0	0	0	0	0	0	0	0	0	0	1	1.74164e-06
		P393	0	0	0	0	0	1	0	0	0	0	0	0	0	0	0	1	1.74164e-06
		N071	0	0	0	0	0	1	0	0	0	0	0	0	0	0	0	1	1.74164e-06
		D376	0	0	0	0	0	1	0	0	0	0	0	0	0	0	0	1	1.74164e-06
		N250	0	0	0	0	0	1	0	0	0	0	0	0	0	0	0	1	1.74164e-06
		L038	0	0	0	0	0	1	0	0	0	0	0	0	0	0	0	1	1.74164e-06
		F195	0	0	0	0	0	1	0	0	0	0	0	0	0	0	0	1	1.74164e-06
		G838	0	0	0	0	0	1	0	0	0	0	0	0	0	0	0	1	1.74164e-06
		B889	0	0	0	0	0	1	0	0	0	0	0	0	0	0	0	1	1.74164e-06
		F058	0	0	0	0	0	1	0	0	0	0	0	0	0	0	0	1	1.74164e-06
		A022	0	0	0	0	0	1	0	0	0	0	0	0	0	0	0	1	1.74164e-06
		E229	0	0	0	0	0	1	0	0	0	0	0	0	0	0	0	1	1.74164e-06
		D097	0	0	0	0	0	1	0	0	0	0	0	0	0	0	0	1	1.74164e-06
		D370	0	0	0	0	0	1	0	0	0	0	0	0	0	0	0	1	1.74164e-06
		Q788	0	0	0	0	0	1	0	0	0	0	0	0	0	0	0	1	1.74164e-06
		G723	0	0	0	0	0	1	0	0	0	0	0	0	0	0	0	1	1.74164e-06
		V575	0	0	0	0	0	1	0	0	0	0	0	0	0	0	0	1	1.74164e-06
		B269	0	0	0	0	0	1	0	0	0	0	0	0	0	0	0	1	1.74164e-06
		B205	0	0	0	0	0	1	0	0	0	0	0	0	0	0	0	1	1.74164e-06
		Y084	0	0	0	0	0	1	0	0	0	0	0	0	0	0	0	1	1.74164e-06
		D143	0	0	0	0	0	1	0	0	0	0	0	0	0	0	0	1	1.74164e-06
		J418	0	0	0	0	0	1	0	0	0	0	0	0	0	0	0	1	1.74164e-06
		J684	0	0	0	0	0	1	0	0	0	0	0	0	0	0	0	1	1.74164e-06
		C504	0	0	0	0	0	1	0	0	0	0	0	0	0	0	0	1	1.74164e-06
		E738	0	0	0	0	0	1	0	0	0	0	0	0	0	0	0	1	1.74164e-06
		L109	0	0	0	0	0	1	0	0	0	0	0	0	0	0	0	1	1.74164e-06
		F250	0	0	0	0	0	1	0	0	0	0	0	0	0	0	0	1	1.74164e-06
		C437	0	0	0	0	0	1	0	0	0	0	0	0	0	0	0	1	1.74164e-06
		D681	0	0	0	0	0	1	0	0	0	0	0	0	0	0	0	1	1.74164e-06
		I898	0	0	0	0	0	1	0	0	0	0	0	0	0	0	0	1	1.74164e-06
		A020	0	0	0	0	0	1	0	0	0	0	0	0	0	0	0	1	1.74164e-06
		P219	0	0	0	0	0	1	0	0	0	0	0	0	0	0	0	1	1.74164e-06
		C441	0	0	0	0	0	1	0	0	0	0	0	0	0	0	0	1	1.74164e-06
		W694	0	0	0	0	0	1	0	0	0	0	0	0	0	0	0	1	1.74164e-06
		O235	0	0	0	0	0	1	0	0	0	0	0	0	0	0	0	1	1.74164e-06
		E68	0	0	0	0	0	1	0	0	0	0	0	0	0	0	0	1	1.74164e-06
		N138	0	0	0	0	0	1	0	0	0	0	0	0	0	0	0	1	1.74164e-06
		X648	0	0	0	0	0	1	0	0	0	0	0	0	0	0	0	1	1.74164e-06
		Y850	0	0	0	0	0	1	0	0	0	0	0	0	0	0	0	1	1.74164e-06
		G713	0	0	0	0	0	1	0	0	0	0	0	0	0	0	0	1	1.74164e-06
		N759	0	0	0	0	0	1	0	0	0	0	0	0	0	0	0	1	1.74164e-06
		D374	0	0	0	0	0	1	0	0	0	0	0	0	0	0	0	1	1.74164e-06
		K717	0	0	0	0	0	0	1	0	0	0	0	0	0	0	0	1	1.74164e-06
		I308	0	0	0	0	0	0	1	0	0	0	0	0	0	0	0	1	1.74164e-06
		W855	0	0	0	0	0	0	1	0	0	0	0	0	0	0	0	1	1.74164e-06
		V925	0	0	0	0	0	0	1	0	0	0	0	0	0	0	0	1	1.74164e-06
		Q875	0	0	0	0	0	0	1	0	0	0	0	0	0	0	0	1	1.74164e-06
		Q201	0	0	0	0	0	0	1	0	0	0	0	0	0	0	0	1	1.74164e-06
		X641	0	0	0	0	0	0	1	0	0	0	0	0	0	0	0	1	1.74164e-06
		Q282	0	0	0	0	0	0	1	0	0	0	0	0	0	0	0	1	1.74164e-06
		X334	0	0	0	0	0	0	1	0	0	0	0	0	0	0	0	1	1.74164e-06
		D530	0	0	0	0	0	0	1	0	0	0	0	0	0	0	0	1	1.74164e-06
		B018	0	0	0	0	0	0	1	0	0	0	0	0	0	0	0	1	1.74164e-06
		C540	0	0	0	0	0	0	1	0	0	0	0	0	0	0	0	1	1.74164e-06
		A819	0	0	0	0	0	0	1	0	0	0	0	0	0	0	0	1	1.74164e-06
		E215	0	0	0	0	0	0	1	0	0	0	0	0	0	0	0	1	1.74164e-06
		G450	0	0	0	0	0	0	1	0	0	0	0	0	0	0	0	1	1.74164e-06
		F328	0	0	0	0	0	0	1	0	0	0	0	0	0	0	0	1	1.74164e-06
		A490	0	0	0	0	0	0	1	0	0	0	0	0	0	0	0	1	1.74164e-06
		X850	0	0	0	0	0	0	1	0	0	0	0	0	0	0	0	1	1.74164e-06
		A400	0	0	0	0	0	0	1	0	0	0	0	0	0	0	0	1	1.74164e-06
		F259	0	0	0	0	0	0	1	0	0	0	0	0	0	0	0	1	1.74164e-06
		J153	0	0	0	0	0	0	1	0	0	0	0	0	0	0	0	1	1.74164e-06
		M082	0	0	0	0	0	0	1	0	0	0	0	0	0	0	0	1	1.74164e-06
		C319	0	0	0	0	0	0	1	0	0	0	0	0	0	0	0	1	1.74164e-06
		K738	0	0	0	0	0	0	1	0	0	0	0	0	0	0	0	1	1.74164e-06
		H819	0	0	0	0	0	0	1	0	0	0	0	0	0	0	0	1	1.74164e-06
		Q278	0	0	0	0	0	0	1	0	0	0	0	0	0	0	0	1	1.74164e-06
		P269	0	0	0	0	0	0	1	0	0	0	0	0	0	0	0	1	1.74164e-06
		Y451	0	0	0	0	0	0	1	0	0	0	0	0	0	0	0	1	1.74164e-06
		I864	0	0	0	0	0	0	1	0	0	0	0	0	0	0	0	1	1.74164e-06
		Y140	0	0	0	0	0	0	1	0	0	0	0	0	0	0	0	1	1.74164e-06
		C767	0	0	0	0	0	0	1	0	0	0	0	0	0	0	0	1	1.74164e-06
		W229	0	0	0	0	0	0	1	0	0	0	0	0	0	0	0	1	1.74164e-06
		W999	0	0	0	0	0	0	1	0	0	0	0	0	0	0	0	1	1.74164e-06
		J931	0	0	0	0	0	0	1	0	0	0	0	0	0	0	0	1	1.74164e-06
		M191	0	0	0	0	0	0	1	0	0	0	0	0	0	0	0	1	1.74164e-06
		F788	0	0	0	0	0	0	1	0	0	0	0	0	0	0	0	1	1.74164e-06
		V182	0	0	0	0	0	0	1	0	0	0	0	0	0	0	0	1	1.74164e-06
		E500	0	0	0	0	0	0	1	0	0	0	0	0	0	0	0	1	1.74164e-06
		V496	0	0	0	0	0	0	1	0	0	0	0	0	0	0	0	1	1.74164e-06
		I788	0	0	0	0	0	0	1	0	0	0	0	0	0	0	0	1	1.74164e-06
		M052	0	0	0	0	0	0	1	0	0	0	0	0	0	0	0	1	1.74164e-06
		C602	0	0	0	0	0	0	1	0	0	0	0	0	0	0	0	1	1.74164e-06
		J029	0	0	0	0	0	0	1	0	0	0	0	0	0	0	0	1	1.74164e-06
		K628	0	0	0	0	0	0	1	0	0	0	0	0	0	0	0	1	1.74164e-06
		C469	0	0	0	0	0	0	1	0	0	0	0	0	0	0	0	1	1.74164e-06
		C091	0	0	0	0	0	0	1	0	0	0	0	0	0	0	0	1	1.74164e-06
		C922	0	0	0	0	0	0	1	0	0	0	0	0	0	0	0	1	1.74164e-06
		C914	0	0	0	0	0	0	1	0	0	0	0	0	0	0	0	1	1.74164e-06
		O742	0	0	0	0	0	0	1	0	0	0	0	0	0	0	0	1	1.74164e-06
		V693	0	0	0	0	0	0	1	0	0	0	0	0	0	0	0	1	1.74164e-06
		M45	0	0	0	0	0	0	1	0	0	0	0	0	0	0	0	1	1.74164e-06
		V904	0	0	0	0	0	0	0	1	0	0	0	0	0	0	0	1	1.74164e-06
		Y142	0	0	0	0	0	0	0	1	0	0	0	0	0	0	0	1	1.74164e-06
		D015	0	0	0	0	0	0	0	1	0	0	0	0	0	0	0	1	1.74164e-06
		F410	0	0	0	0	0	0	0	1	0	0	0	0	0	0	0	1	1.74164e-06
		W169	0	0	0	0	0	0	0	1	0	0	0	0	0	0	0	1	1.74164e-06
		L511	0	0	0	0	0	0	0	1	0	0	0	0	0	0	0	1	1.74164e-06
		V902	0	0	0	0	0	0	0	1	0	0	0	0	0	0	0	1	1.74164e-06
		X448	0	0	0	0	0	0	0	1	0	0	0	0	0	0	0	1	1.74164e-06
		X848	0	0	0	0	0	0	0	1	0	0	0	0	0	0	0	1	1.74164e-06
		Y636	0	0	0	0	0	0	0	1	0	0	0	0	0	0	0	1	1.74164e-06
		D043	0	0	0	0	0	0	0	1	0	0	0	0	0	0	0	1	1.74164e-06
		E722	0	0	0	0	0	0	0	1	0	0	0	0	0	0	0	1	1.74164e-06
		Q917	0	0	0	0	0	0	0	1	0	0	0	0	0	0	0	1	1.74164e-06
		O995	0	0	0	0	0	0	0	1	0	0	0	0	0	0	0	1	1.74164e-06
		W012	0	0	0	0	0	0	0	1	0	0	0	0	0	0	0	1	1.74164e-06
		F118	0	0	0	0	0	0	0	1	0	0	0	0	0	0	0	1	1.74164e-06
		G900	0	0	0	0	0	0	0	1	0	0	0	0	0	0	0	1	1.74164e-06
		I470	0	0	0	0	0	0	0	1	0	0	0	0	0	0	0	1	1.74164e-06
		D099	0	0	0	0	0	0	0	1	0	0	0	0	0	0	0	1	1.74164e-06
		E060	0	0	0	0	0	0	0	1	0	0	0	0	0	0	0	1	1.74164e-06
		I159	0	0	0	0	0	0	0	1	0	0	0	0	0	0	0	1	1.74164e-06
		P969	0	0	0	0	0	0	0	1	0	0	0	0	0	0	0	1	1.74164e-06
		M513	0	0	0	0	0	0	0	1	0	0	0	0	0	0	0	1	1.74164e-06
		I888	0	0	0	0	0	0	0	1	0	0	0	0	0	0	0	1	1.74164e-06
		F419	0	0	0	0	0	0	0	1	0	0	0	0	0	0	0	1	1.74164e-06
		X452	0	0	0	0	0	0	0	1	0	0	0	0	0	0	0	1	1.74164e-06
		E617	0	0	0	0	0	0	0	1	0	0	0	0	0	0	0	1	1.74164e-06
		N818	0	0	0	0	0	0	0	1	0	0	0	0	0	0	0	1	1.74164e-06
		K210	0	0	0	0	0	0	0	1	0	0	0	0	0	0	0	1	1.74164e-06
		G600	0	0	0	0	0	0	0	1	0	0	0	0	0	0	0	1	1.74164e-06
		C268	0	0	0	0	0	0	0	1	0	0	0	0	0	0	0	1	1.74164e-06
		O039	0	0	0	0	0	0	0	1	0	0	0	0	0	0	0	1	1.74164e-06
		F449	0	0	0	0	0	0	0	1	0	0	0	0	0	0	0	1	1.74164e-06
		A562	0	0	0	0	0	0	0	1	0	0	0	0	0	0	0	1	1.74164e-06
		N490	0	0	0	0	0	0	0	1	0	0	0	0	0	0	0	1	1.74164e-06
		G418	0	0	0	0	0	0	0	1	0	0	0	0	0	0	0	1	1.74164e-06
		Q872	0	0	0	0	0	0	0	1	0	0	0	0	0	0	0	1	1.74164e-06
		F115	0	0	0	0	0	0	0	1	0	0	0	0	0	0	0	1	1.74164e-06
		D510	0	0	0	0	0	0	0	1	0	0	0	0	0	0	0	1	1.74164e-06
		C040	0	0	0	0	0	0	0	1	0	0	0	0	0	0	0	1	1.74164e-06
		D751	0	0	0	0	0	0	0	1	0	0	0	0	0	0	0	1	1.74164e-06
		M432	0	0	0	0	0	0	0	1	0	0	0	0	0	0	0	1	1.74164e-06
		G239	0	0	0	0	0	0	0	1	0	0	0	0	0	0	0	1	1.74164e-06
		J385	0	0	0	0	0	0	0	1	0	0	0	0	0	0	0	1	1.74164e-06
		K627	0	0	0	0	0	0	0	1	0	0	0	0	0	0	0	1	1.74164e-06
		B332	0	0	0	0	0	0	0	1	0	0	0	0	0	0	0	1	1.74164e-06
		D179	0	0	0	0	0	0	0	1	0	0	0	0	0	0	0	1	1.74164e-06
		X799	0	0	0	0	0	0	0	1	0	0	0	0	0	0	0	1	1.74164e-06
		F913	0	0	0	0	0	0	0	1	0	0	0	0	0	0	0	1	1.74164e-06
		X097	0	0	0	0	0	0	0	1	0	0	0	0	0	0	0	1	1.74164e-06
		V295	0	0	0	0	0	0	0	0	1	0	0	0	0	0	0	1	1.74164e-06
		V189	0	0	0	0	0	0	0	0	1	0	0	0	0	0	0	1	1.74164e-06
		X279	0	0	0	0	0	0	0	0	1	0	0	0	0	0	0	1	1.74164e-06
		X479	0	0	0	0	0	0	0	0	1	0	0	0	0	0	0	1	1.74164e-06
		D159	0	0	0	0	0	0	0	0	1	0	0	0	0	0	0	1	1.74164e-06
		C401	0	0	0	0	0	0	0	0	1	0	0	0	0	0	0	1	1.74164e-06
		J391	0	0	0	0	0	0	0	0	1	0	0	0	0	0	0	1	1.74164e-06
		G473	0	0	0	0	0	0	0	0	1	0	0	0	0	0	0	1	1.74164e-06
		V849	0	0	0	0	0	0	0	0	1	0	0	0	0	0	0	1	1.74164e-06
		A89	0	0	0	0	0	0	0	0	1	0	0	0	0	0	0	1	1.74164e-06
		K660	0	0	0	0	0	0	0	0	1	0	0	0	0	0	0	1	1.74164e-06
		G712	0	0	0	0	0	0	0	0	1	0	0	0	0	0	0	1	1.74164e-06
		C924	0	0	0	0	0	0	0	0	1	0	0	0	0	0	0	1	1.74164e-06
		F182	0	0	0	0	0	0	0	0	1	0	0	0	0	0	0	1	1.74164e-06
		C222	0	0	0	0	0	0	0	0	1	0	0	0	0	0	0	1	1.74164e-06
		F252	0	0	0	0	0	0	0	0	1	0	0	0	0	0	0	1	1.74164e-06
		J040	0	0	0	0	0	0	0	0	1	0	0	0	0	0	0	1	1.74164e-06
		W297	0	0	0	0	0	0	0	0	1	0	0	0	0	0	0	1	1.74164e-06
		X508	0	0	0	0	0	0	0	0	1	0	0	0	0	0	0	1	1.74164e-06
		M064	0	0	0	0	0	0	0	0	1	0	0	0	0	0	0	1	1.74164e-06
		M300	0	0	0	0	0	0	0	0	1	0	0	0	0	0	0	1	1.74164e-06
		X250	0	0	0	0	0	0	0	0	1	0	0	0	0	0	0	1	1.74164e-06
		B409	0	0	0	0	0	0	0	0	1	0	0	0	0	0	0	1	1.74164e-06
		I010	0	0	0	0	0	0	0	0	1	0	0	0	0	0	0	1	1.74164e-06
		W209	0	0	0	0	0	0	0	0	1	0	0	0	0	0	0	1	1.74164e-06
		M489	0	0	0	0	0	0	0	0	1	0	0	0	0	0	0	1	1.74164e-06
		Y079	0	0	0	0	0	0	0	0	1	0	0	0	0	0	0	1	1.74164e-06
		O993	0	0	0	0	0	0	0	0	1	0	0	0	0	0	0	1	1.74164e-06
		E754	0	0	0	0	0	0	0	0	1	0	0	0	0	0	0	1	1.74164e-06
		N303	0	0	0	0	0	0	0	0	1	0	0	0	0	0	0	1	1.74164e-06
		C630	0	0	0	0	0	0	0	0	1	0	0	0	0	0	0	1	1.74164e-06
		C12	0	0	0	0	0	0	0	0	1	0	0	0	0	0	0	1	1.74164e-06
		I440	0	0	0	0	0	0	0	0	1	0	0	0	0	0	0	1	1.74164e-06
		W139	0	0	0	0	0	0	0	0	1	0	0	0	0	0	0	1	1.74164e-06
		D379	0	0	0	0	0	0	0	0	1	0	0	0	0	0	0	1	1.74164e-06
		C758	0	0	0	0	0	0	0	0	1	0	0	0	0	0	0	1	1.74164e-06
		D319	0	0	0	0	0	0	0	0	1	0	0	0	0	0	0	1	1.74164e-06
		C062	0	0	0	0	0	0	0	0	1	0	0	0	0	0	0	1	1.74164e-06
		G062	0	0	0	0	0	0	0	0	1	0	0	0	0	0	0	1	1.74164e-06
		V144	0	0	0	0	0	0	0	0	1	0	0	0	0	0	0	1	1.74164e-06
		N832	0	0	0	0	0	0	0	0	1	0	0	0	0	0	0	1	1.74164e-06
		A058	0	0	0	0	0	0	0	0	1	0	0	0	0	0	0	1	1.74164e-06
		D390	0	0	0	0	0	0	0	0	1	0	0	0	0	0	0	1	1.74164e-06
		C390	0	0	0	0	0	0	0	0	1	0	0	0	0	0	0	1	1.74164e-06
		W172	0	0	0	0	0	0	0	0	1	0	0	0	0	0	0	1	1.74164e-06
		M358	0	0	0	0	0	0	0	0	1	0	0	0	0	0	0	1	1.74164e-06
		Y319	0	0	0	0	0	0	0	0	1	0	0	0	0	0	0	1	1.74164e-06
		C917	0	0	0	0	0	0	0	0	1	0	0	0	0	0	0	1	1.74164e-06
		D461	0	0	0	0	0	0	0	0	1	0	0	0	0	0	0	1	1.74164e-06
		C165	0	0	0	0	0	0	0	0	1	0	0	0	0	0	0	1	1.74164e-06
		J680	0	0	0	0	0	0	0	0	1	0	0	0	0	0	0	1	1.74164e-06
		P010	0	0	0	0	0	0	0	0	1	0	0	0	0	0	0	1	1.74164e-06
		O988	0	0	0	0	0	0	0	0	1	0	0	0	0	0	0	1	1.74164e-06
		G804	0	0	0	0	0	0	0	0	1	0	0	0	0	0	0	1	1.74164e-06
		F112	0	0	0	0	0	0	0	0	0	1	0	0	0	0	0	1	1.74164e-06
		K508	0	0	0	0	0	0	0	0	0	1	0	0	0	0	0	1	1.74164e-06
		O265	0	0	0	0	0	0	0	0	0	1	0	0	0	0	0	1	1.74164e-06
		P229	0	0	0	0	0	0	0	0	0	1	0	0	0	0	0	1	1.74164e-06
		E619	0	0	0	0	0	0	0	0	0	1	0	0	0	0	0	1	1.74164e-06
		V905	0	0	0	0	0	0	0	0	0	1	0	0	0	0	0	1	1.74164e-06
		N002	0	0	0	0	0	0	0	0	0	1	0	0	0	0	0	1	1.74164e-06
		D695	0	0	0	0	0	0	0	0	0	1	0	0	0	0	0	1	1.74164e-06
		O459	0	0	0	0	0	0	0	0	0	1	0	0	0	0	0	1	1.74164e-06
		X780	0	0	0	0	0	0	0	0	0	1	0	0	0	0	0	1	1.74164e-06
		F89	0	0	0	0	0	0	0	0	0	1	0	0	0	0	0	1	1.74164e-06
		X979	0	0	0	0	0	0	0	0	0	1	0	0	0	0	0	1	1.74164e-06
		A270	0	0	0	0	0	0	0	0	0	1	0	0	0	0	0	1	1.74164e-06
		B334	0	0	0	0	0	0	0	0	0	1	0	0	0	0	0	1	1.74164e-06
		C838	0	0	0	0	0	0	0	0	0	1	0	0	0	0	0	1	1.74164e-06
		W142	0	0	0	0	0	0	0	0	0	1	0	0	0	0	0	1	1.74164e-06
		A430	0	0	0	0	0	0	0	0	0	1	0	0	0	0	0	1	1.74164e-06
		O120	0	0	0	0	0	0	0	0	0	1	0	0	0	0	0	1	1.74164e-06
		A160	0	0	0	0	0	0	0	0	0	1	0	0	0	0	0	1	1.74164e-06
		A988	0	0	0	0	0	0	0	0	0	1	0	0	0	0	0	1	1.74164e-06
		A99	0	0	0	0	0	0	0	0	0	1	0	0	0	0	0	1	1.74164e-06
		B49	0	0	0	0	0	0	0	0	0	1	0	0	0	0	0	1	1.74164e-06
		V184	0	0	0	0	0	0	0	0	0	1	0	0	0	0	0	1	1.74164e-06
		O720	0	0	0	0	0	0	0	0	0	1	0	0	0	0	0	1	1.74164e-06
		M308	0	0	0	0	0	0	0	0	0	1	0	0	0	0	0	1	1.74164e-06
		K633	0	0	0	0	0	0	0	0	0	1	0	0	0	0	0	1	1.74164e-06
		V942	0	0	0	0	0	0	0	0	0	1	0	0	0	0	0	1	1.74164e-06
		B190	0	0	0	0	0	0	0	0	0	1	0	0	0	0	0	1	1.74164e-06
		N171	0	0	0	0	0	0	0	0	0	1	0	0	0	0	0	1	1.74164e-06
		C050	0	0	0	0	0	0	0	0	0	1	0	0	0	0	0	1	1.74164e-06
		V536	0	0	0	0	0	0	0	0	0	1	0	0	0	0	0	1	1.74164e-06
		F160	0	0	0	0	0	0	0	0	0	1	0	0	0	0	0	1	1.74164e-06
		Y570	0	0	0	0	0	0	0	0	0	1	0	0	0	0	0	1	1.74164e-06
		N837	0	0	0	0	0	0	0	0	0	1	0	0	0	0	0	1	1.74164e-06
		E134	0	0	0	0	0	0	0	0	0	1	0	0	0	0	0	1	1.74164e-06
		C781	0	0	0	0	0	0	0	0	0	1	0	0	0	0	0	1	1.74164e-06
		E721	0	0	0	0	0	0	0	0	0	1	0	0	0	0	0	1	1.74164e-06
		C153	0	0	0	0	0	0	0	0	0	1	0	0	0	0	0	1	1.74164e-06
		I779	0	0	0	0	0	0	0	0	0	1	0	0	0	0	0	1	1.74164e-06
		C495	0	0	0	0	0	0	0	0	0	1	0	0	0	0	0	1	1.74164e-06
		J386	0	0	0	0	0	0	0	0	0	1	0	0	0	0	0	1	1.74164e-06
		X610	0	0	0	0	0	0	0	0	0	1	0	0	0	0	0	1	1.74164e-06
		X899	0	0	0	0	0	0	0	0	0	1	0	0	0	0	0	1	1.74164e-06
		G603	0	0	0	0	0	0	0	0	0	1	0	0	0	0	0	1	1.74164e-06
		K294	0	0	0	0	0	0	0	0	0	1	0	0	0	0	0	1	1.74164e-06
		W540	0	0	0	0	0	0	0	0	0	1	0	0	0	0	0	1	1.74164e-06
		C171	0	0	0	0	0	0	0	0	0	1	0	0	0	0	0	1	1.74164e-06
		M154	0	0	0	0	0	0	0	0	0	1	0	0	0	0	0	1	1.74164e-06
		N394	0	0	0	0	0	0	0	0	0	1	0	0	0	0	0	1	1.74164e-06
		J635	0	0	0	0	0	0	0	0	0	1	0	0	0	0	0	1	1.74164e-06
		V877	0	0	0	0	0	0	0	0	0	1	0	0	0	0	0	1	1.74164e-06
		X622	0	0	0	0	0	0	0	0	0	1	0	0	0	0	0	1	1.74164e-06
		A542	0	0	0	0	0	0	0	0	0	1	0	0	0	0	0	1	1.74164e-06
		E309	0	0	0	0	0	0	0	0	0	1	0	0	0	0	0	1	1.74164e-06
		B020	0	0	0	0	0	0	0	0	0	1	0	0	0	0	0	1	1.74164e-06
		D352	0	0	0	0	0	0	0	0	0	1	0	0	0	0	0	1	1.74164e-06
		C023	0	0	0	0	0	0	0	0	0	1	0	0	0	0	0	1	1.74164e-06
		P239	0	0	0	0	0	0	0	0	0	0	1	0	0	0	0	1	1.74164e-06
		B469	0	0	0	0	0	0	0	0	0	0	1	0	0	0	0	1	1.74164e-06
		O868	0	0	0	0	0	0	0	0	0	0	1	0	0	0	0	1	1.74164e-06
		D460	0	0	0	0	0	0	0	0	0	0	1	0	0	0	0	1	1.74164e-06
		J634	0	0	0	0	0	0	0	0	0	0	1	0	0	0	0	1	1.74164e-06
		I889	0	0	0	0	0	0	0	0	0	0	1	0	0	0	0	1	1.74164e-06
		W188	0	0	0	0	0	0	0	0	0	0	1	0	0	0	0	1	1.74164e-06
		W154	0	0	0	0	0	0	0	0	0	0	1	0	0	0	0	1	1.74164e-06
		I131	0	0	0	0	0	0	0	0	0	0	1	0	0	0	0	1	1.74164e-06
		O441	0	0	0	0	0	0	0	0	0	0	1	0	0	0	0	1	1.74164e-06
		B341	0	0	0	0	0	0	0	0	0	0	1	0	0	0	0	1	1.74164e-06
		J320	0	0	0	0	0	0	0	0	0	0	1	0	0	0	0	1	1.74164e-06
		P284	0	0	0	0	0	0	0	0	0	0	1	0	0	0	0	1	1.74164e-06
		K719	0	0	0	0	0	0	0	0	0	0	1	0	0	0	0	1	1.74164e-06
		Q061	0	0	0	0	0	0	0	0	0	0	1	0	0	0	0	1	1.74164e-06
		Q218	0	0	0	0	0	0	0	0	0	0	1	0	0	0	0	1	1.74164e-06
		X490	0	0	0	0	0	0	0	0	0	0	1	0	0	0	0	1	1.74164e-06
		C461	0	0	0	0	0	0	0	0	0	0	1	0	0	0	0	1	1.74164e-06
		N201	0	0	0	0	0	0	0	0	0	0	1	0	0	0	0	1	1.74164e-06
		P243	0	0	0	0	0	0	0	0	0	0	1	0	0	0	0	1	1.74164e-06
		V030	0	0	0	0	0	0	0	0	0	0	1	0	0	0	0	1	1.74164e-06
		A609	0	0	0	0	0	0	0	0	0	0	1	0	0	0	0	1	1.74164e-06
		I773	0	0	0	0	0	0	0	0	0	0	1	0	0	0	0	1	1.74164e-06
		J920	0	0	0	0	0	0	0	0	0	0	1	0	0	0	0	1	1.74164e-06
		V576	0	0	0	0	0	0	0	0	0	0	1	0	0	0	0	1	1.74164e-06
		E40	0	0	0	0	0	0	0	0	0	0	1	0	0	0	0	1	1.74164e-06
		X401	0	0	0	0	0	0	0	0	0	0	1	0	0	0	0	1	1.74164e-06
		X690	0	0	0	0	0	0	0	0	0	0	1	0	0	0	0	1	1.74164e-06
		N700	0	0	0	0	0	0	0	0	0	0	1	0	0	0	0	1	1.74164e-06
		V498	0	0	0	0	0	0	0	0	0	0	1	0	0	0	0	1	1.74164e-06
		W859	0	0	0	0	0	0	0	0	0	0	1	0	0	0	0	1	1.74164e-06
		N391	0	0	0	0	0	0	0	0	0	0	1	0	0	0	0	1	1.74164e-06
		F189	0	0	0	0	0	0	0	0	0	0	1	0	0	0	0	1	1.74164e-06
		F206	0	0	0	0	0	0	0	0	0	0	1	0	0	0	0	1	1.74164e-06
		C66	0	0	0	0	0	0	0	0	0	0	1	0	0	0	0	1	1.74164e-06
		W834	0	0	0	0	0	0	0	0	0	0	1	0	0	0	0	1	1.74164e-06
		D486	0	0	0	0	0	0	0	0	0	0	1	0	0	0	0	1	1.74164e-06
		X619	0	0	0	0	0	0	0	0	0	0	1	0	0	0	0	1	1.74164e-06
		D103	0	0	0	0	0	0	0	0	0	0	1	0	0	0	0	1	1.74164e-06
		X220	0	0	0	0	0	0	0	0	0	0	1	0	0	0	0	1	1.74164e-06
		X422	0	0	0	0	0	0	0	0	0	0	1	0	0	0	0	1	1.74164e-06
		I129	0	0	0	0	0	0	0	0	0	0	1	0	0	0	0	1	1.74164e-06
		G960	0	0	0	0	0	0	0	0	0	0	1	0	0	0	0	1	1.74164e-06
		X238	0	0	0	0	0	0	0	0	0	0	1	0	0	0	0	1	1.74164e-06
		D001	0	0	0	0	0	0	0	0	0	0	1	0	0	0	0	1	1.74164e-06
		H659	0	0	0	0	0	0	0	0	0	0	1	0	0	0	0	1	1.74164e-06
		C831	0	0	0	0	0	0	0	0	0	0	1	0	0	0	0	1	1.74164e-06
		N132	0	0	0	0	0	0	0	0	0	0	1	0	0	0	0	1	1.74164e-06
		K121	0	0	0	0	0	0	0	0	0	0	1	0	0	0	0	1	1.74164e-06
		C493	0	0	0	0	0	0	0	0	0	0	1	0	0	0	0	1	1.74164e-06
		Y712	0	0	0	0	0	0	0	0	0	0	1	0	0	0	0	1	1.74164e-06
		J668	0	0	0	0	0	0	0	0	0	0	1	0	0	0	0	1	1.74164e-06
		C024	0	0	0	0	0	0	0	0	0	0	1	0	0	0	0	1	1.74164e-06
		W875	0	0	0	0	0	0	0	0	0	0	1	0	0	0	0	1	1.74164e-06
		W178	0	0	0	0	0	0	0	0	0	0	1	0	0	0	0	1	1.74164e-06
		V119	0	0	0	0	0	0	0	0	0	0	1	0	0	0	0	1	1.74164e-06
		X100	0	0	0	0	0	0	0	0	0	0	1	0	0	0	0	1	1.74164e-06
		Q439	0	0	0	0	0	0	0	0	0	0	1	0	0	0	0	1	1.74164e-06
		F438	0	0	0	0	0	0	0	0	0	0	1	0	0	0	0	1	1.74164e-06
		B220	0	0	0	0	0	0	0	0	0	0	1	0	0	0	0	1	1.74164e-06
		Y049	0	0	0	0	0	0	0	0	0	0	1	0	0	0	0	1	1.74164e-06
		X939	0	0	0	0	0	0	0	0	0	0	1	0	0	0	0	1	1.74164e-06
		Q893	0	0	0	0	0	0	0	0	0	0	1	0	0	0	0	1	1.74164e-06
		G92	0	0	0	0	0	0	0	0	0	0	1	0	0	0	0	1	1.74164e-06
		W149	0	0	0	0	0	0	0	0	0	0	1	0	0	0	0	1	1.74164e-06
		C65	0	0	0	0	0	0	0	0	0	0	0	1	0	0	0	1	1.74164e-06
		C138	0	0	0	0	0	0	0	0	0	0	0	1	0	0	0	1	1.74164e-06
		N509	0	0	0	0	0	0	0	0	0	0	0	1	0	0	0	1	1.74164e-06
		A401	0	0	0	0	0	0	0	0	0	0	0	1	0	0	0	1	1.74164e-06
		W079	0	0	0	0	0	0	0	0	0	0	0	1	0	0	0	1	1.74164e-06
		N030	0	0	0	0	0	0	0	0	0	0	0	1	0	0	0	1	1.74164e-06
		O879	0	0	0	0	0	0	0	0	0	0	0	1	0	0	0	1	1.74164e-06
		V922	0	0	0	0	0	0	0	0	0	0	0	1	0	0	0	1	1.74164e-06
		D483	0	0	0	0	0	0	0	0	0	0	0	1	0	0	0	1	1.74164e-06
		E272	0	0	0	0	0	0	0	0	0	0	0	1	0	0	0	1	1.74164e-06
		K763	0	0	0	0	0	0	0	0	0	0	0	1	0	0	0	1	1.74164e-06
		Y848	0	0	0	0	0	0	0	0	0	0	0	1	0	0	0	1	1.74164e-06
		O140	0	0	0	0	0	0	0	0	0	0	0	1	0	0	0	1	1.74164e-06
		Q056	0	0	0	0	0	0	0	0	0	0	0	1	0	0	0	1	1.74164e-06
		I515	0	0	0	0	0	0	0	0	0	0	0	1	0	0	0	1	1.74164e-06
		K253	0	0	0	0	0	0	0	0	0	0	0	1	0	0	0	1	1.74164e-06
		N768	0	0	0	0	0	0	0	0	0	0	0	1	0	0	0	1	1.74164e-06
		B333	0	0	0	0	0	0	0	0	0	0	0	1	0	0	0	1	1.74164e-06
		D046	0	0	0	0	0	0	0	0	0	0	0	1	0	0	0	1	1.74164e-06
		F129	0	0	0	0	0	0	0	0	0	0	0	1	0	0	0	1	1.74164e-06
[truncated: 220 more rows]

## Sheet: Male
		UCs	2006	2007	2008	2009	2010	2011	2012	2013	2014	2015	2016	2017	2018	2019	2020	TOTAL	%
		I219	14312	13669	13917	13973	15872	15891	15920	16496	15211	16668	15889	15537	16201	15693	13564	228813	0.679331
		E149	678	721	771	797	861	993	954	1038	899	1104	912	922	984	888	725	13247	0.0393295
		I251	718	731	779	677	612	639	682	751	901	760	820	873	811	873	788	11415	0.0338904
		I255	425	518	524	523	422	502	475	475	557	542	572	602	699	691	574	8101	0.0240514
		I259	461	562	520	499	510	486	426	437	431	441	528	560	494	479	506	7340	0.021792
		I248	580	623	589	588	441	421	387	379	321	335	270	224	215	178	157	5708	0.0169467
		J449	208	163	193	174	233	234	225	271	167	242	171	162	212	167	147	2969	0.00881477
		I210	153	144	109	148	170	214	255	201	147	183	145	170	232	226	192	2689	0.00798347
		I64	173	170	154	136	153	175	198	185	165	163	142	141	166	105	114	2340	0.00694731
		F102	155	121	131	123	143	152	140	189	133	138	131	138	132	117	101	2044	0.00606851
		E119	62	52	54	69	83	109	90	133	140	185	169	179	257	214	212	2008	0.00596162
		E142	93	100	112	99	114	134	147	141	124	153	123	138	138	131	115	1862	0.00552816
		E788	81	86	111	111	132	153	167	154	128	153	133	120	100	101	72	1802	0.00535002
		I420	112	101	104	128	95	88	84	99	107	83	113	97	80	111	69	1471	0.0043673
		E148	52	54	74	96	111	103	112	109	84	87	72	79	97	84	80	1294	0.0038418
		J189	47	63	50	69	76	72	94	87	110	108	122	107	100	96	78	1279	0.00379727
		I249	38	29	27	38	48	51	52	79	77	83	113	142	149	173	179	1278	0.0037943
		I258	73	85	63	87	49	57	103	83	93	87	95	84	85	82	95	1221	0.00362507
		E669	68	54	40	70	82	79	78	101	71	94	70	93	90	119	68	1177	0.00349444
		C61	44	51	54	56	73	63	85	76	83	94	86	72	73	89	74	1073	0.00318567
		I429	74	59	72	66	89	85	75	73	47	77	59	61	73	69	50	1029	0.00305504
		I422	47	66	60	64	40	59	43	35	79	50	79	69	66	129	42	928	0.00275517
		B572	58	56	56	67	79	68	75	74	52	62	51	54	56	56	44	908	0.00269579
		N189	42	54	46	46	56	53	69	55	50	63	60	77	67	71	42	851	0.00252656
		I213	33	21	33	26	32	25	47	50	53	63	54	87	108	117	97	846	0.00251172
		I694	42	43	50	41	55	55	53	60	69	71	49	61	67	49	43	808	0.0023989
		I209	60	47	50	55	63	59	55	50	45	47	35	37	51	47	45	746	0.00221483
		I211	29	28	26	33	26	37	37	28	44	38	60	60	72	90	66	674	0.00200106
		J439	53	49	46	51	53	38	41	48	45	42	36	26	35	35	27	625	0.00185559
		I678	35	38	47	45	36	49	32	40	42	54	35	34	29	28	29	573	0.0017012
		K703	34	31	30	30	40	41	42	40	46	39	57	33	40	28	28	559	0.00165964
		B342	0	0	0	0	0	0	0	0	0	0	0	0	0	0	551	551	0.00163588
		J440	25	25	33	30	41	37	32	38	44	37	36	51	44	37	21	531	0.00157651
		E109	10	10	10	19	16	22	26	38	40	55	47	43	55	63	52	506	0.00150228
		C349	19	31	41	31	29	29	35	34	35	37	35	36	31	36	33	492	0.00146072
		N179	18	23	24	20	28	30	20	39	41	44	35	42	57	37	32	490	0.00145478
		E147	22	18	20	25	31	46	39	31	22	41	37	33	38	37	30	470	0.0013954
		E780	32	14	21	24	39	38	23	42	37	48	30	30	38	25	17	458	0.00135977
		E145	26	27	28	29	28	22	32	29	30	40	28	37	30	27	26	439	0.00130336
		I212	8	11	11	11	18	33	33	31	22	15	38	46	59	63	33	432	0.00128258
		I229	31	23	18	24	23	34	37	34	32	32	28	30	34	23	28	431	0.00127961
		I252	53	63	74	76	89	63	0	0	0	0	0	0	0	0	0	418	0.00124102
		K746	28	28	26	38	32	20	36	35	25	26	27	22	24	28	19	414	0.00122914
		G309	7	12	15	18	16	26	27	32	32	37	33	29	51	34	32	401	0.00119054
		I250	18	14	7	19	17	16	34	35	35	28	34	39	32	38	20	386	0.00114601
		A419	19	21	14	20	21	18	20	23	21	39	27	26	37	34	28	368	0.00109257
		N19	18	24	23	25	31	17	28	18	25	23	21	17	27	25	18	340	0.00100944
		E668	11	12	22	18	20	26	26	22	22	23	16	20	20	22	22	302	0.000896619
		E118	5	3	15	12	11	20	16	26	20	21	23	37	31	36	24	300	0.000890681
		E140	18	14	10	16	40	27	33	39	25	23	25	3	8	11	5	297	0.000881774
		I426	18	13	18	13	20	19	19	19	26	24	18	24	25	24	16	296	0.000878805
		J180	21	26	23	13	12	23	19	15	16	18	19	17	19	21	12	274	0.000813488
		E112	8	9	10	5	17	8	11	23	26	21	20	31	34	21	29	273	0.00081052
		N390	6	10	9	14	20	9	14	17	11	34	25	22	28	31	19	269	0.000798644
		C169	13	13	18	18	16	17	15	23	18	22	28	17	22	17	11	268	0.000795675
		J459	16	20	26	19	19	20	16	14	13	24	9	17	22	12	19	266	0.000789737
		E785	12	8	16	12	21	14	13	20	23	28	20	19	22	14	13	255	0.000757079
		I214	14	6	6	13	12	10	6	15	16	29	22	28	26	29	19	251	0.000745203
		I710	6	20	18	24	14	13	12	16	16	16	21	15	19	27	12	249	0.000739265
		I350	12	12	17	10	17	10	8	12	17	11	19	21	22	21	25	234	0.000694731
		E789	2	2	8	4	9	13	13	13	16	23	15	25	21	32	38	234	0.000694731
		J159	7	4	9	6	7	9	9	11	15	23	21	14	24	36	34	229	0.000679886
		I619	13	14	18	20	13	10	15	14	21	17	21	13	15	14	8	226	0.00067098
		I269	10	13	12	8	17	16	16	13	20	13	18	14	11	23	17	221	0.000656135
		G409	10	12	10	9	21	19	22	16	13	21	19	14	11	13	10	220	0.000653166
		I279	10	15	6	6	18	15	21	24	11	19	13	10	14	10	17	209	0.000620508
		G20	6	6	12	9	7	17	17	20	16	21	13	15	19	18	10	206	0.000611601
		E141	10	15	12	10	8	14	15	17	13	15	16	14	16	16	7	198	0.000587849
		E889	2	1	6	7	10	9	7	8	14	19	26	26	22	25	15	197	0.00058488
		E108	7	1	10	7	8	17	3	15	17	17	16	13	15	26	11	183	0.000543315
		E107	4	3	5	6	9	8	9	19	9	12	12	15	18	23	26	178	0.000528471
		I739	10	12	9	12	10	7	11	7	12	7	8	14	11	15	15	160	0.00047503
		E117	6	6	6	3	13	7	13	9	11	12	15	13	18	14	14	160	0.00047503
		I253	6	14	11	16	13	10	10	6	13	12	14	10	10	6	4	155	0.000460185
		K922	7	7	14	13	6	7	8	13	11	17	8	13	8	14	5	151	0.000448309
		D649	11	8	12	4	13	14	4	11	6	15	17	5	4	11	14	149	0.000442371
		I38	8	13	9	14	11	10	7	8	12	8	9	14	4	6	11	144	0.000427527
		I10	5	6	2	8	16	7	13	12	11	11	9	11	14	6	8	139	0.000412682
		J448	12	8	8	7	10	10	11	5	12	13	6	12	10	9	5	138	0.000409713
		E46	13	6	8	7	7	11	12	11	11	7	10	10	6	8	10	137	0.000406744
		C159	4	6	8	10	7	9	10	16	4	13	11	10	11	13	5	137	0.000406744
		I256	15	4	9	5	5	6	5	6	8	13	12	10	14	13	11	136	0.000403775
		A09	13	10	8	11	10	8	9	11	8	12	11	7	8	5	3	134	0.000397837
		C679	6	8	11	3	6	8	7	15	10	12	11	10	7	8	9	131	0.000388931
		J988	11	12	9	11	6	12	5	9	10	5	11	5	6	6	11	129	0.000382993
		I714	5	5	17	9	10	4	9	7	14	11	7	4	5	10	9	126	0.000374086
		E115	1	3	2	7	4	4	6	4	5	15	5	8	13	23	25	125	0.000371117
		C189	2	8	3	7	7	12	9	6	7	15	6	5	11	18	4	120	0.000356272
		I639	2	10	9	8	3	1	6	5	4	4	10	10	18	16	14	120	0.000356272
		C329	4	5	9	4	9	8	11	7	7	7	11	5	8	10	8	113	0.00033549
		C229	4	4	3	7	4	7	9	13	6	8	14	8	8	10	7	112	0.000332521
		I719	6	6	8	9	7	5	8	6	7	12	10	8	4	12	2	110	0.000326583
		K920	7	11	6	7	7	8	7	2	9	5	3	7	8	10	12	109	0.000323614
		J841	10	4	6	6	4	8	6	6	8	4	11	7	11	11	6	108	0.000320645
		K550	6	5	10	7	8	11	3	6	3	5	4	11	7	4	16	106	0.000314707
		I340	1	4	8	4	14	9	6	11	4	5	6	7	10	13	4	106	0.000314707
		I713	9	6	4	8	4	9	9	6	12	4	8	6	8	6	6	105	0.000311738
		E110	2	6	6	1	8	8	10	12	10	6	7	5	8	11	5	105	0.000311738
		J984	9	5	5	7	7	10	8	11	4	7	11	5	6	2	6	103	0.0003058
		I421	5	4	3	4	7	1	9	9	7	7	7	11	8	8	13	103	0.0003058
		J441	5	5	0	4	1	4	3	3	6	4	6	11	12	26	13	103	0.0003058
		E146	4	3	3	11	9	8	8	8	4	3	8	4	11	8	11	103	0.0003058
		F109	2	5	7	5	4	8	6	4	0	10	9	7	9	13	14	103	0.0003058
		K704	8	10	3	9	7	6	12	5	0	5	5	6	12	8	6	102	0.000302831
		I428	3	6	3	6	5	2	1	12	3	5	7	8	9	18	13	101	0.000299863
		E782	2	1	1	3	5	2	6	9	2	21	8	8	12	6	11	97	0.000287987
		K729	3	3	10	4	11	6	8	7	9	7	9	5	5	2	5	94	0.00027908
		Q245	9	13	8	13	9	2	8	11	2	3	4	4	3	3	1	93	0.000276111
		E102	2	4	5	3	3	5	3	5	4	8	8	14	13	5	9	91	0.000270173
		Q249	4	3	5	8	6	8	13	5	9	4	6	3	5	8	3	90	0.000267204
		N40	3	7	3	6	13	6	5	2	9	6	3	8	9	5	4	89	0.000264235
		K769	4	4	5	11	5	4	3	7	7	4	8	5	8	4	9	88	0.000261266
		K709	0	1	8	10	5	6	10	5	5	10	5	6	5	7	5	88	0.000261266
		I718	1	5	10	9	3	3	6	10	5	7	5	9	3	6	4	86	0.000255328
		A162	4	6	4	9	8	5	2	6	7	4	9	5	5	5	5	84	0.000249391
		J690	4	3	6	4	7	2	5	10	4	6	10	6	8	4	5	84	0.000249391
		I802	5	5	4	7	6	5	3	5	6	8	7	5	6	3	5	80	0.000237515
		I351	3	4	5	9	4	4	4	5	7	7	3	7	6	6	5	79	0.000234546
		C259	5	3	5	6	2	4	3	6	4	5	7	5	6	5	12	78	0.000231577
		E105	5	1	1	3	2	3	7	8	7	5	5	10	5	8	7	77	0.000228608
		C80	4	7	3	7	3	6	9	7	5	8	5	3	1	5	3	76	0.000225639
		E660	5	1	1	3	4	4	5	4	3	12	4	8	3	9	9	75	0.00022267
		B24	3	3	2	4	5	5	3	1	5	8	6	9	2	8	11	75	0.00022267
		I698	3	3	7	2	7	0	5	3	6	9	6	9	5	4	5	74	0.000219701
		C260	4	5	4	2	4	1	5	3	5	6	11	6	6	5	6	73	0.000216732
		I270	3	5	6	9	2	5	6	9	3	3	4	7	6	2	3	73	0.000216732
		W189	0	2	1	3	6	6	5	3	6	5	10	11	8	4	3	73	0.000216732
		E86	3	2	6	6	9	8	5	4	10	6	2	6	2	2	1	72	0.000213763
		C64	1	5	2	5	2	6	2	4	5	6	7	6	3	7	11	72	0.000213763
		K859	0	0	0	3	3	8	9	2	9	3	5	9	9	5	7	72	0.000213763
		F100	5	6	9	11	5	6	7	5	3	4	3	2	2	2	0	70	0.000207826
		C20	4	0	7	4	1	3	8	1	7	3	4	8	7	8	4	69	0.000204857
		Y349	6	1	8	5	2	4	7	1	6	5	1	2	7	10	3	68	0.000201888
		I509	2	2	2	1	2	3	1	6	3	10	6	8	4	11	7	68	0.000201888
		B570	1	7	6	2	3	6	9	11	1	2	3	5	5	4	3	68	0.000201888
		J42	8	4	5	5	8	4	6	6	5	5	3	1	6	1	0	67	0.000198919
		I228	2	4	1	1	4	4	1	3	6	8	5	12	10	3	3	67	0.000198919
		E116	1	1	2	0	1	1	2	5	3	9	8	9	8	5	12	67	0.000198919
		F172	7	4	5	6	5	3	2	4	7	4	3	4	7	3	2	66	0.00019595
		I119	1	0	2	2	1	3	0	2	3	4	11	3	12	11	11	66	0.00019595
		I220	4	6	6	5	4	8	4	3	7	2	2	4	9	1	0	65	0.000192981
		I254	3	4	0	3	2	4	4	1	7	5	4	1	7	11	9	65	0.000192981
		I672	8	9	4	3	3	8	1	6	7	5	2	2	2	1	2	63	0.000187043
		E100	6	3	4	6	5	1	2	8	3	8	3	2	2	6	4	63	0.000187043
		C449	1	4	3	1	2	5	6	3	5	3	6	6	7	5	5	62	0.000184074
		N039	0	2	0	1	1	3	2	1	6	2	2	12	8	10	9	59	0.000175167
		E111	3	4	1	0	3	1	1	5	5	7	3	9	7	7	2	58	0.000172198
		F101	0	3	0	3	1	6	2	7	3	0	6	5	6	11	5	58	0.000172198
		K566	2	6	2	4	6	4	4	5	7	2	2	1	2	6	4	57	0.000169229
		C710	4	3	3	3	4	1	5	7	6	3	3	4	4	2	2	54	0.000160323
		E43	2	2	1	4	5	8	1	4	2	6	4	2	5	1	7	54	0.000160323
		C900	6	1	4	5	2	4	3	4	2	1	1	4	7	3	6	53	0.000157354
		I359	5	2	8	3	3	8	3	1	3	3	1	1	5	1	5	52	0.000154385
		I110	3	4	3	1	5	5	3	5	4	5	4	2	2	4	1	51	0.000151416
		I693	1	0	1	0	1	1	2	3	4	1	7	7	13	4	6	51	0.000151416
		J989	1	4	4	2	6	1	5	4	2	5	1	6	1	4	5	51	0.000151416
		K810	4	5	5	0	3	1	5	6	1	1	4	5	3	5	2	50	0.000148447
		I059	2	3	3	4	6	6	6	3	2	5	1	4	1	1	3	50	0.000148447
		E101	0	3	2	5	3	2	3	5	6	3	4	1	2	6	5	50	0.000148447
		W180	3	3	3	3	1	0	0	3	6	3	6	2	8	5	3	49	0.000145478
		E039	2	1	0	1	4	2	3	6	6	3	4	3	3	7	4	49	0.000145478
		N180	0	2	3	0	1	0	2	3	2	1	6	2	8	8	11	49	0.000145478
		C859	2	2	2	2	3	3	6	4	6	2	2	4	2	5	3	48	0.000142509
		I609	4	3	1	3	2	2	1	1	1	2	7	6	4	4	6	47	0.00013954
		E878	4	2	3	4	7	3	4	1	2	6	1	3	3	2	1	46	0.000136571
		I679	2	2	0	6	3	3	2	7	2	2	4	1	6	1	1	42	0.000124695
		B573	1	3	2	3	4	0	5	4	3	4	4	2	3	2	2	42	0.000124695
		G405	4	2	8	6	3	4	0	1	1	1	2	4	0	2	3	41	0.000121726
		J90	2	2	2	5	0	1	5	0	2	5	4	4	4	5	0	41	0.000121726
		N289	2	4	1	5	3	3	5	2	3	4	2	1	3	1	2	41	0.000121726
		K700	1	0	3	4	4	3	0	1	3	1	3	1	3	8	6	41	0.000121726
		I771	4	2	4	3	1	1	1	6	4	4	2	2	2	2	2	40	0.000118757
		I712	3	2	2	3	4	3	1	4	3	3	3	2	2	4	1	40	0.000118757
		I080	0	3	2	3	4	5	1	5	1	5	0	4	3	1	3	40	0.000118757
		I358	4	0	4	6	3	2	2	2	3	1	5	1	3	1	2	39	0.000115789
		I711	4	3	0	2	0	3	3	1	3	3	2	2	4	7	2	39	0.000115789
		I319	3	2	5	2	2	2	4	5	2	4	3	1	2	2	0	39	0.000115789
		K701	3	1	2	1	0	3	4	4	1	3	5	2	2	6	2	39	0.000115789
		I221	2	2	2	1	1	1	3	3	3	5	2	4	5	1	4	39	0.000115789
		F106	1	5	3	6	3	5	3	4	4	3	1	1	0	0	0	39	0.000115789
		I743	2	4	2	4	1	1	4	5	3	3	3	3	0	3	0	38	0.00011282
		I330	1	1	3	2	1	3	4	4	2	2	4	4	2	3	2	38	0.00011282
		C760	2	1	2	4	3	1	1	2	2	4	2	5	4	3	1	37	0.000109851
		K819	2	1	3	3	1	2	1	0	3	3	2	1	6	4	4	36	0.000106882
		Y838	1	1	2	1	3	0	1	2	4	4	0	1	8	3	4	35	0.000103913
		E139	0	0	0	2	3	4	6	2	4	5	4	1	2	2	0	35	0.000103913
		M319	3	1	4	3	4	2	5	4	1	1	1	1	0	1	3	34	0.000100944
		E162	1	3	0	2	3	3	1	6	3	1	2	4	3	1	1	34	0.000100944
		C920	1	1	4	2	1	1	4	1	4	3	2	1	4	4	1	34	0.000100944
		C719	0	1	3	3	5	3	1	0	1	4	1	1	4	3	4	34	0.000100944
		Q210	0	4	1	0	0	3	4	3	1	1	4	1	6	1	5	34	0.000100944
		W199	3	3	1	3	4	3	2	1	1	3	0	1	2	4	2	33	9.79749e-05
		I208	1	3	6	6	3	1	0	2	3	1	2	2	0	2	1	33	9.79749e-05
		A46	4	0	0	0	3	2	2	2	2	4	0	4	4	3	2	32	9.5006e-05
		A309	1	3	1	5	4	4	1	2	2	1	1	3	0	3	1	32	9.5006e-05
		K570	0	1	2	2	4	2	1	1	3	4	4	2	4	1	1	32	9.5006e-05
		K760	0	3	3	4	2	2	4	3	2	4	0	1	1	2	1	32	9.5006e-05
		D509	2	2	0	1	1	1	2	1	0	4	0	5	6	2	4	31	9.2037e-05
		I671	1	2	2	2	3	1	2	5	0	4	1	1	4	3	0	31	9.2037e-05
		C220	3	1	0	1	5	2	1	0	2	5	2	4	4	0	0	30	8.90681e-05
		G931	2	2	2	4	1	2	3	3	2	1	0	1	4	1	1	29	8.60991e-05
		K850	0	0	0	0	2	2	1	3	4	5	2	5	2	3	0	29	8.60991e-05
		M069	3	0	1	2	4	1	1	1	2	3	1	2	3	2	2	28	8.31302e-05
		G301	1	1	2	1	2	0	5	3	3	2	0	1	3	1	3	28	8.31302e-05
		C140	1	1	2	2	2	3	0	1	2	1	2	4	1	5	1	28	8.31302e-05
		X429	0	1	0	0	3	0	2	2	1	2	4	4	3	4	2	28	8.31302e-05
		K85	11	9	7	0	0	0	0	0	0	0	0	0	0	0	0	27	8.01613e-05
		E106	4	1	0	1	1	3	0	2	3	2	2	2	2	3	1	27	8.01613e-05
		C959	0	1	2	2	2	3	3	2	2	2	2	2	1	2	1	27	8.01613e-05
		F192	0	0	0	0	1	4	2	0	3	1	4	2	5	4	1	27	8.01613e-05
		Y832	6	3	1	1	4	3	2	0	2	0	1	0	1	1	1	26	7.71923e-05
		C069	3	2	1	1	1	2	4	4	1	2	1	0	2	1	1	26	7.71923e-05
		E144	1	2	0	0	3	5	2	2	0	1	3	4	1	0	2	26	7.71923e-05
		V892	0	1	0	2	5	1	4	1	1	1	3	2	2	1	2	26	7.71923e-05
		R092	0	0	0	1	4	1	0	1	1	2	1	2	12	0	1	26	7.71923e-05
		J46	4	0	1	5	3	1	1	5	0	1	1	2	1	0	0	25	7.42234e-05
		J40	2	3	1	3	1	2	1	4	1	4	1	1	1	0	0	25	7.42234e-05
		I424	0	0	2	3	0	2	2	0	2	2	1	1	5	3	2	25	7.42234e-05
		A90	0	0	3	0	3	0	2	1	1	1	9	0	1	3	1	25	7.42234e-05
		C19	0	1	1	2	2	1	1	2	2	3	2	3	4	1	0	25	7.42234e-05
		N12	0	2	1	0	3	3	4	1	2	1	1	0	4	1	2	25	7.42234e-05
		W698	5	0	2	1	3	2	3	1	1	0	3	0	0	2	1	24	7.12545e-05
		K802	2	2	2	2	1	0	1	1	2	6	2	1	2	0	0	24	7.12545e-05
		I803	2	3	0	6	0	3	0	0	1	1	5	2	1	0	0	24	7.12545e-05
		F03	2	1	4	1	0	1	3	0	1	4	0	1	1	1	4	24	7.12545e-05
		D689	1	0	3	6	1	0	1	1	1	4	2	1	2	0	1	24	7.12545e-05
		D469	0	4	0	2	1	0	5	2	1	1	1	4	1	0	2	24	7.12545e-05
		G122	0	0	0	0	1	1	4	2	2	2	5	3	1	1	2	24	7.12545e-05
		E784	0	0	1	0	1	0	0	1	1	3	7	7	0	1	2	24	7.12545e-05
		W190	1	3	2	4	0	0	1	2	1	2	2	0	1	1	3	23	6.82855e-05
		J985	1	3	4	6	2	0	0	0	1	0	2	1	0	1	2	23	6.82855e-05
		F103	1	2	0	3	0	4	2	4	1	0	1	1	1	1	2	23	6.82855e-05
		E781	1	1	0	3	1	0	1	2	0	1	3	2	4	2	2	23	6.82855e-05
		I500	1	1	1	1	1	1	1	2	4	1	2	3	1	1	2	23	6.82855e-05
		I050	0	3	4	0	5	1	3	1	1	1	1	2	1	0	0	23	6.82855e-05
		J158	0	1	0	1	0	0	0	1	1	1	1	2	4	4	7	23	6.82855e-05
		W879	0	0	1	1	3	0	1	1	3	2	2	1	1	4	3	23	6.82855e-05
		I260	3	0	0	0	4	3	2	0	0	3	3	1	0	2	1	22	6.53166e-05
		A169	3	1	1	2	1	1	2	3	1	2	0	1	2	1	1	22	6.53166e-05
		J969	2	0	0	0	0	1	0	0	1	3	4	4	1	1	5	22	6.53166e-05
		K409	1	0	1	2	2	4	3	2	1	2	1	0	2	1	0	22	6.53166e-05
		E126	1	1	1	0	2	5	0	0	1	2	3	1	0	2	3	22	6.53166e-05
		J961	1	2	0	3	1	2	1	2	2	1	0	0	3	2	2	22	6.53166e-05
		J181	0	3	0	2	1	3	2	0	2	2	3	0	2	2	0	22	6.53166e-05
		I638	0	1	0	0	0	0	0	0	0	2	0	4	0	6	9	22	6.53166e-05
		I674	3	0	1	0	0	4	2	2	2	0	1	2	1	2	1	21	6.23477e-05
		K259	2	2	1	1	2	3	1	3	0	0	1	0	1	3	1	21	6.23477e-05
		K254	1	0	6	1	3	1	1	0	1	1	0	2	2	1	1	21	6.23477e-05
		J188	1	0	1	1	1	1	0	2	1	1	5	2	3	1	1	21	6.23477e-05
		D539	0	1	2	1	5	0	2	1	2	0	2	3	1	0	1	21	6.23477e-05
		I089	0	2	1	0	0	3	0	0	1	2	2	1	5	1	3	21	6.23477e-05
		I200	0	1	0	3	3	0	1	0	3	0	3	0	3	3	1	21	6.23477e-05
		J681	0	2	0	3	1	3	0	0	1	3	2	4	0	2	0	21	6.23477e-05
		E059	4	2	2	0	1	2	0	0	0	4	0	0	2	1	2	20	5.93787e-05
		I872	2	4	0	1	0	0	1	1	1	3	4	0	0	2	1	20	5.93787e-05
		C798	2	1	0	1	2	1	1	3	1	0	0	2	2	2	2	20	5.93787e-05
		B575	1	2	0	3	2	3	0	2	2	2	2	0	0	1	0	20	5.93787e-05
		I691	1	0	1	1	3	0	2	2	0	2	2	1	3	1	1	20	5.93787e-05
		N200	1	1	2	0	1	1	1	2	2	2	3	1	2	0	1	20	5.93787e-05
		E872	0	0	2	1	0	1	2	2	1	4	2	2	1	2	0	20	5.93787e-05
		X599	4	1	2	0	1	0	1	1	0	1	2	2	0	3	1	19	5.64098e-05
		I019	2	4	0	2	1	0	1	1	1	0	2	0	1	3	1	19	5.64098e-05
		I201	1	1	0	1	1	3	2	1	2	2	0	1	0	3	1	19	5.64098e-05
		K579	1	0	1	2	1	0	3	2	1	0	1	1	5	1	0	19	5.64098e-05
		I709	1	0	0	0	2	1	0	0	1	2	2	1	1	5	3	19	5.64098e-05
		W870	0	0	2	3	0	0	1	4	2	1	1	2	2	0	1	19	5.64098e-05
		A418	0	1	1	0	1	1	0	1	1	1	0	5	1	3	3	19	5.64098e-05
		K830	2	0	2	1	1	0	2	1	2	1	1	2	2	0	1	18	5.34408e-05
		V299	2	0	1	1	0	1	0	2	4	0	2	1	3	0	1	18	5.34408e-05
		L89	2	1	2	2	1	2	1	0	0	2	1	0	1	2	1	18	5.34408e-05
		M321	1	0	1	1	0	1	0	4	0	1	3	0	1	5	0	18	5.34408e-05
		E138	1	0	0	2	2	2	1	2	3	1	0	0	1	2	1	18	5.34408e-05
		W010	1	1	1	0	1	1	0	3	1	3	1	3	1	1	0	18	5.34408e-05
		Q909	0	1	0	3	0	1	5	1	1	1	1	1	0	1	2	18	5.34408e-05
		C439	0	0	4	1	1	1	1	1	1	1	1	2	2	1	1	18	5.34408e-05
		C109	0	0	1	2	2	3	0	0	3	3	1	0	3	0	0	18	5.34408e-05
		B207	0	0	1	0	1	0	3	1	0	1	3	3	1	3	1	18	5.34408e-05
		C269	3	1	1	0	1	3	3	2	2	0	0	1	0	0	0	17	5.04719e-05
		C762	1	1	1	1	0	4	1	2	2	0	0	1	1	2	0	17	5.04719e-05
		F104	1	1	1	2	1	3	0	3	0	1	1	0	2	0	1	17	5.04719e-05
		B182	1	1	0	1	0	2	0	3	2	1	1	2	1	1	1	17	5.04719e-05
		I620	0	0	0	1	1	1	0	1	3	0	2	2	4	2	0	17	5.04719e-05
		N188	1	0	2	0	0	1	0	2	3	0	2	1	0	2	2	16	4.7503e-05
		E756	1	0	0	1	0	0	2	3	0	1	1	2	3	1	1	16	4.7503e-05
		V499	1	2	1	0	2	1	0	0	2	0	3	1	0	2	1	16	4.7503e-05
		G710	0	0	0	1	0	1	1	3	2	1	3	0	2	0	2	16	4.7503e-05
		K403	2	0	0	0	2	1	0	0	1	1	1	2	1	2	2	15	4.4534e-05
		M318	2	3	0	1	2	1	0	0	2	0	0	2	1	0	1	15	4.4534e-05
		K721	1	1	1	0	0	1	1	1	1	3	1	1	1	1	1	15	4.4534e-05
		C250	0	0	1	0	1	0	1	1	2	3	0	0	0	4	2	15	4.4534e-05
		Q248	0	1	1	3	1	0	0	2	0	0	1	1	3	2	0	15	4.4534e-05
		E136	0	0	0	0	0	1	1	0	0	0	1	2	9	1	0	15	4.4534e-05
		J849	0	1	1	2	0	0	1	0	2	0	0	1	1	4	2	15	4.4534e-05
		I313	0	1	0	2	0	0	2	1	0	2	0	0	4	2	1	15	4.4534e-05
		I81	0	0	0	3	0	2	1	2	0	2	0	1	2	2	0	15	4.4534e-05
		W019	0	0	1	0	0	1	0	2	1	2	2	1	4	1	0	15	4.4534e-05
		K852	0	0	0	0	1	2	1	1	3	3	1	1	0	1	1	15	4.4534e-05
		J80	3	0	1	0	1	1	1	0	0	1	1	1	1	1	2	14	4.15651e-05
		K359	3	0	1	2	0	1	0	1	0	1	0	0	2	2	1	14	4.15651e-05
		K297	2	0	3	1	0	0	2	1	1	2	0	0	0	1	1	14	4.15651e-05
		C187	2	2	2	0	0	1	0	0	0	4	0	0	0	0	3	14	4.15651e-05
		I423	2	3	0	3	1	0	1	1	2	0	1	0	0	0	0	14	4.15651e-05
		I349	1	0	0	1	1	2	1	0	0	3	1	0	0	3	1	14	4.15651e-05
		G934	1	3	0	0	1	0	0	3	1	0	1	1	0	2	1	14	4.15651e-05
		D648	1	0	2	1	0	1	0	1	0	2	0	2	2	1	1	14	4.15651e-05
		C73	1	0	1	0	1	0	0	2	3	0	3	0	2	1	0	14	4.15651e-05
		G35	0	0	1	1	1	1	3	1	0	2	2	1	1	0	0	14	4.15651e-05
		A150	0	0	1	1	0	1	1	1	0	0	0	3	2	1	3	14	4.15651e-05
		F209	0	0	0	0	3	1	1	1	2	0	0	0	2	4	0	14	4.15651e-05
		B571	0	1	0	1	0	4	1	2	0	1	0	2	1	1	0	14	4.15651e-05
		A91	0	1	1	0	1	2	1	0	0	1	2	1	0	3	1	14	4.15651e-05
		I716	0	1	0	3	2	3	1	0	0	1	0	0	0	1	2	14	4.15651e-05
		I738	0	0	1	0	0	1	0	0	1	1	1	1	3	5	0	14	4.15651e-05
		F142	0	0	0	0	1	0	0	0	2	3	2	1	3	1	1	14	4.15651e-05
		K659	2	1	2	0	1	1	0	1	1	0	1	1	1	1	0	13	3.85962e-05
		F322	1	0	1	0	0	0	1	2	1	2	0	0	1	2	2	13	3.85962e-05
		I629	1	3	0	0	1	0	0	2	1	0	0	2	1	2	0	13	3.85962e-05
		K860	1	0	1	1	2	2	1	0	0	0	2	1	0	0	2	13	3.85962e-05
		D571	1	0	0	0	0	2	2	2	1	1	1	1	2	0	0	13	3.85962e-05
		C029	1	0	1	0	1	1	2	1	3	0	1	0	1	1	0	13	3.85962e-05
		B208	0	0	2	1	2	0	1	0	1	2	0	1	2	0	1	13	3.85962e-05
		I271	0	0	2	0	0	0	3	2	2	0	1	2	1	0	0	13	3.85962e-05
		I058	0	1	1	0	1	0	3	0	1	2	1	0	1	1	1	13	3.85962e-05
		C609	0	3	1	0	1	2	1	1	1	0	1	1	0	1	0	13	3.85962e-05
		J129	0	1	1	1	0	0	0	1	0	0	3	1	0	0	5	13	3.85962e-05
		F199	0	0	0	1	0	0	1	1	0	0	1	2	0	4	3	13	3.85962e-05
		K292	3	1	1	2	0	1	2	0	0	0	1	0	0	1	0	12	3.56272e-05
		K861	2	0	1	1	2	1	0	0	1	1	0	1	0	2	0	12	3.56272e-05
		K290	1	1	1	2	1	0	3	1	0	1	1	0	0	0	0	12	3.56272e-05
		B92	1	0	0	3	1	2	0	1	0	0	0	0	3	1	0	12	3.56272e-05
		C911	1	0	0	2	0	2	0	2	1	1	0	0	2	0	1	12	3.56272e-05
		C383	1	1	0	1	0	1	1	2	1	0	1	0	0	0	3	12	3.56272e-05
		I083	1	0	0	1	0	0	1	1	0	0	1	0	4	3	0	12	3.56272e-05
		C910	1	0	1	0	2	0	0	0	1	2	1	3	1	0	0	12	3.56272e-05
		C419	1	0	1	1	0	0	2	4	0	1	1	1	0	0	0	12	3.56272e-05
		Q253	0	0	0	2	0	1	2	3	1	0	1	0	0	1	1	12	3.56272e-05
		W849	0	0	1	1	0	1	1	0	1	0	1	2	1	2	1	12	3.56272e-05
		C788	0	0	1	1	2	0	2	1	3	0	0	1	0	0	1	12	3.56272e-05
		I099	0	3	1	1	0	1	2	0	0	1	1	0	0	2	0	12	3.56272e-05
		J47	0	0	3	2	1	2	0	1	0	1	0	0	0	1	1	12	3.56272e-05
		N10	0	2	2	0	0	2	1	0	2	0	1	0	1	1	0	12	3.56272e-05
		A049	0	0	0	0	1	1	0	1	0	1	0	0	3	0	5	12	3.56272e-05
		X959	0	1	3	1	0	0	1	2	1	0	0	2	0	0	1	12	3.56272e-05
		C01	0	0	2	0	0	0	1	0	0	2	1	1	2	2	1	12	3.56272e-05
		C412	0	0	0	1	1	1	1	0	2	0	1	2	0	2	1	12	3.56272e-05
		K858	0	0	0	0	0	0	2	0	0	0	0	1	2	3	4	12	3.56272e-05
		K275	1	0	0	3	1	1	1	1	1	1	0	1	0	0	0	11	3.26583e-05
		I950	1	0	0	2	0	0	0	1	0	1	0	1	2	3	0	11	3.26583e-05
		K562	1	0	0	0	1	1	2	0	0	0	2	1	1	1	1	11	3.26583e-05
		I731	1	0	1	2	0	0	0	2	2	1	0	0	1	1	0	11	3.26583e-05
		I051	1	0	1	0	1	0	2	1	1	0	1	0	2	1	0	11	3.26583e-05
		I409	1	0	0	0	0	1	2	1	1	0	0	1	0	4	0	11	3.26583e-05
		D400	1	1	0	0	1	1	1	0	1	0	1	3	0	0	1	11	3.26583e-05
		J22	0	1	1	3	1	0	2	0	0	0	0	0	0	1	2	11	3.26583e-05
		G311	0	0	0	0	1	0	0	0	0	1	1	1	0	3	4	11	3.26583e-05
		I513	0	1	2	0	1	0	0	0	0	1	1	2	1	1	1	11	3.26583e-05
		C921	0	2	1	0	0	2	1	0	0	0	1	1	2	0	1	11	3.26583e-05
		Y839	0	1	1	0	1	2	0	1	2	0	1	0	0	2	0	11	3.26583e-05
		X459	0	0	0	0	1	0	0	2	1	1	2	2	1	1	0	11	3.26583e-05
		B948	0	0	0	0	0	1	3	0	0	1	0	2	0	1	3	11	3.26583e-05
		J64	2	0	1	1	0	2	1	0	0	1	0	2	0	0	0	10	2.96894e-05
		K274	2	2	0	1	0	1	0	0	2	0	0	0	0	1	1	10	2.96894e-05
		K469	2	1	0	1	0	2	0	1	0	1	0	0	0	2	0	10	2.96894e-05
		K767	2	1	0	0	0	0	0	0	0	2	0	2	1	1	1	10	2.96894e-05
		C780	1	0	0	1	1	2	1	0	0	1	0	1	1	1	0	10	2.96894e-05
		E874	1	0	0	0	1	0	0	2	0	1	2	0	3	0	0	10	2.96894e-05
		D619	1	0	0	0	0	0	1	0	1	1	2	2	2	0	0	10	2.96894e-05
		K279	1	2	2	0	0	4	0	0	0	1	0	0	0	0	0	10	2.96894e-05
		N429	1	0	3	1	1	1	0	1	0	0	0	0	1	1	0	10	2.96894e-05
		I069	1	1	0	1	0	1	2	1	2	0	0	0	1	0	0	10	2.96894e-05
		E440	1	1	0	0	0	0	0	0	2	0	0	1	2	2	1	10	2.96894e-05
		K264	1	1	1	1	0	0	1	0	1	0	2	1	1	0	0	10	2.96894e-05
		G919	0	0	0	1	0	0	0	1	1	1	2	1	1	0	2	10	2.96894e-05
		I748	0	0	0	0	0	0	0	1	0	0	2	0	3	2	2	10	2.96894e-05
		K800	0	0	0	2	1	2	0	0	0	1	0	1	3	0	0	10	2.96894e-05
		B349	0	1	0	0	1	0	1	0	0	2	3	1	0	0	1	10	2.96894e-05
		G319	0	0	1	0	1	1	1	0	0	0	2	1	0	3	0	10	2.96894e-05
		E232	0	2	2	0	0	0	1	1	0	1	1	1	0	0	1	10	2.96894e-05
		E41	0	2	1	0	1	0	2	1	2	1	0	0	0	0	0	10	2.96894e-05
		C179	0	1	0	1	0	0	0	1	2	1	1	1	1	0	1	10	2.96894e-05
		V093	0	1	0	1	1	0	1	3	0	1	0	0	0	1	1	10	2.96894e-05
		E840	0	0	0	0	1	1	0	1	1	1	0	2	1	1	1	10	2.96894e-05
		X420	0	1	0	0	0	0	0	2	1	0	0	1	2	3	0	10	2.96894e-05
		C249	0	0	1	0	1	0	1	1	1	0	1	1	1	2	0	10	2.96894e-05
		I830	0	0	0	1	0	1	1	1	0	1	0	2	2	1	0	10	2.96894e-05
		G459	0	0	0	2	2	1	2	0	0	0	0	0	1	2	0	10	2.96894e-05
		E104	0	0	2	0	1	1	0	1	1	0	1	1	0	0	2	10	2.96894e-05
		K460	0	0	1	1	1	2	0	0	0	2	0	0	0	3	0	10	2.96894e-05
		C240	0	0	0	4	1	0	0	2	1	1	0	0	0	1	0	10	2.96894e-05
		G629	0	0	0	1	1	2	1	2	1	0	1	1	0	0	0	10	2.96894e-05
		M109	0	0	0	1	0	0	1	1	1	0	1	2	1	0	2	10	2.96894e-05
		I519	0	0	0	0	0	0	0	1	0	0	1	1	4	1	2	10	2.96894e-05
		D683	0	0	0	0	0	3	1	0	2	1	0	2	1	0	0	10	2.96894e-05
		I499	0	0	0	0	0	2	0	1	2	0	0	1	0	1	3	10	2.96894e-05
		J09	0	0	0	0	0	0	1	0	0	0	3	0	4	0	2	10	2.96894e-05
		J869	2	0	2	1	0	0	0	1	0	0	0	0	1	0	2	9	2.67204e-05
		F105	2	1	0	2	1	1	0	1	0	1	0	0	0	0	0	9	2.67204e-05
		J980	2	0	0	0	0	1	0	1	0	2	0	1	1	1	0	9	2.67204e-05
		B909	1	1	0	0	0	3	0	2	0	1	1	0	0	0	0	9	2.67204e-05
		K295	1	1	1	0	0	0	1	2	1	0	0	0	1	1	0	9	2.67204e-05
		X954	1	0	0	2	0	1	1	1	0	0	1	1	1	0	0	9	2.67204e-05
		C950	1	0	1	0	1	1	0	1	1	2	0	0	1	0	0	9	2.67204e-05
		I618	1	1	0	0	1	0	0	1	0	2	1	2	0	0	0	9	2.67204e-05
		I744	1	0	0	0	0	1	1	2	1	0	2	0	0	1	0	9	2.67204e-05
		C23	0	0	0	0	1	1	1	1	0	1	1	0	0	2	1	9	2.67204e-05
		M199	0	0	2	0	2	1	1	2	0	0	1	0	0	0	0	9	2.67204e-05
		E875	0	0	1	0	1	0	0	1	0	0	0	2	0	2	2	9	2.67204e-05
		K805	0	0	1	1	1	0	1	0	0	0	0	1	1	3	0	9	2.67204e-05
		I741	0	1	2	0	0	0	0	2	1	1	1	0	1	0	0	9	2.67204e-05
		C170	0	0	0	0	1	0	0	0	0	2	1	1	2	0	2	9	2.67204e-05
		K720	0	0	0	0	0	1	0	1	0	1	2	2	1	1	0	9	2.67204e-05
		J410	0	1	1	0	3	1	0	1	0	1	0	0	1	0	0	9	2.67204e-05
		I062	0	0	0	0	1	1	0	1	0	3	1	2	0	0	0	9	2.67204e-05
		I241	0	1	0	0	2	0	0	1	0	0	0	0	0	0	5	9	2.67204e-05
		C320	0	1	0	0	0	3	2	0	0	0	1	1	0	1	0	9	2.67204e-05
		D62	0	1	0	2	0	1	1	1	1	1	0	1	0	0	0	9	2.67204e-05
		I071	0	0	1	1	0	1	0	0	2	0	2	0	1	1	0	9	2.67204e-05
		K350	0	0	1	1	0	2	1	0	0	1	1	1	0	1	0	9	2.67204e-05
		Y129	0	0	0	1	0	0	0	2	2	1	2	0	0	1	0	9	2.67204e-05
		A499	0	0	0	1	0	0	1	0	1	0	2	1	1	1	1	9	2.67204e-05
		G400	0	0	0	0	0	2	0	1	0	1	0	1	1	2	1	9	2.67204e-05
		M623	0	0	0	0	0	2	0	0	0	0	2	0	3	0	2	9	2.67204e-05
		X640	0	0	0	0	0	1	0	1	1	0	1	2	2	0	1	9	2.67204e-05
		K851	0	0	0	0	0	1	0	1	3	1	0	0	0	2	1	9	2.67204e-05
		I272	0	0	0	0	0	0	1	0	1	0	1	3	2	1	0	9	2.67204e-05
		K250	0	0	0	0	0	0	1	2	1	0	0	0	3	1	1	9	2.67204e-05
		A920	0	0	0	0	0	0	0	0	0	0	5	4	0	0	0	9	2.67204e-05
		J628	1	0	0	1	0	1	0	1	1	0	0	0	1	0	2	8	2.37515e-05
		I634	1	1	0	2	0	0	0	3	0	0	0	0	0	0	1	8	2.37515e-05
		K37	1	0	1	0	0	0	0	0	1	1	0	2	0	1	1	8	2.37515e-05
		E114	0	0	1	1	1	0	1	1	0	1	0	0	0	0	2	8	2.37515e-05
		F329	0	0	0	2	0	1	0	1	0	2	0	0	1	1	0	8	2.37515e-05
		D696	0	1	0	0	0	1	0	1	1	0	0	0	1	3	0	8	2.37515e-05
		X999	0	2	0	0	0	1	0	0	0	0	1	1	2	1	0	8	2.37515e-05
		Y836	0	0	1	0	0	0	0	1	0	1	0	2	0	2	1	8	2.37515e-05
		I278	0	0	2	2	1	0	0	0	1	0	0	1	0	0	1	8	2.37515e-05
		C160	0	1	1	0	0	1	0	0	2	0	0	1	0	1	1	8	2.37515e-05
		G809	0	0	2	0	2	0	0	0	1	0	0	0	1	1	1	8	2.37515e-05
		B169	0	1	0	1	1	1	0	1	1	1	1	0	0	0	0	8	2.37515e-05
		Y834	0	0	0	0	0	2	0	3	0	0	2	1	0	0	0	8	2.37515e-05
		V289	0	1	1	0	0	0	2	1	0	0	2	0	1	0	0	8	2.37515e-05
		C499	0	0	0	0	0	0	0	2	2	2	1	0	0	1	0	8	2.37515e-05
		K631	0	0	2	1	0	0	1	1	0	0	0	1	0	2	0	8	2.37515e-05
		I092	0	0	1	1	0	2	0	0	1	0	0	0	2	1	0	8	2.37515e-05
		D075	0	0	1	0	1	0	2	1	1	1	0	1	0	0	0	8	2.37515e-05
		N209	0	0	1	0	0	1	0	0	0	1	1	1	2	0	1	8	2.37515e-05
		A483	0	0	0	0	0	0	1	1	0	1	1	0	1	3	0	8	2.37515e-05
		X990	0	0	0	2	1	1	0	1	1	1	0	0	0	1	0	8	2.37515e-05
		J110	0	0	0	2	0	0	1	0	0	0	1	1	2	1	0	8	2.37515e-05
		A153	0	0	0	1	3	0	1	0	1	0	0	0	1	0	1	8	2.37515e-05
		N419	0	0	0	0	1	0	0	2	1	2	1	0	1	0	0	8	2.37515e-05
		X499	0	0	0	0	0	2	0	0	1	1	1	1	0	2	0	8	2.37515e-05
		X590	0	0	0	0	0	0	0	2	0	1	3	0	0	0	2	8	2.37515e-05
		Y883	2	1	0	0	0	2	0	0	1	0	0	0	0	1	0	7	2.07826e-05
		C787	1	0	2	0	0	0	1	1	0	0	0	0	0	2	0	7	2.07826e-05
		J398	1	1	0	2	1	0	1	0	0	0	1	0	0	0	0	7	2.07826e-05
		D45	1	0	1	0	0	0	0	0	2	0	0	3	0	0	0	7	2.07826e-05
		C443	1	0	0	0	1	1	0	0	0	1	0	0	0	2	1	7	2.07826e-05
		K766	1	1	0	0	0	1	0	0	1	1	1	0	0	1	0	7	2.07826e-05
		I832	1	1	0	0	0	0	1	0	0	1	0	2	0	1	0	7	2.07826e-05
		Q613	1	0	0	1	0	1	1	0	0	0	1	0	0	2	0	7	2.07826e-05
		J939	1	0	1	1	1	0	0	0	0	0	2	1	0	0	0	7	2.07826e-05
		B199	1	1	2	1	0	0	0	1	0	0	0	0	1	0	0	7	2.07826e-05
		C509	0	0	0	0	0	1	0	0	1	1	1	0	0	3	0	7	2.07826e-05
		I839	0	0	0	0	0	0	1	1	1	2	0	1	0	0	1	7	2.07826e-05
		K578	0	0	0	2	0	0	1	0	0	0	2	1	0	0	1	7	2.07826e-05
		I510	0	1	0	0	0	1	2	1	0	1	0	0	0	1	0	7	2.07826e-05
		J709	0	0	1	1	1	0	1	0	1	1	1	0	0	0	0	7	2.07826e-05
		I341	0	0	0	0	1	0	0	0	0	0	1	2	2	0	1	7	2.07826e-05
		E113	0	0	0	0	0	0	0	1	0	1	0	0	3	1	1	7	2.07826e-05
		Y199	0	0	0	0	1	0	0	1	2	0	0	0	0	1	2	7	2.07826e-05
		K251	0	2	0	1	2	0	0	0	0	0	1	0	0	0	1	7	2.07826e-05
		E790	0	2	0	0	0	0	0	0	1	1	1	0	0	2	0	7	2.07826e-05
		G939	0	2	1	0	1	0	0	1	0	0	0	0	1	0	1	7	2.07826e-05
		K801	0	1	0	2	0	1	0	0	1	0	0	1	0	1	0	7	2.07826e-05
		I052	0	0	0	0	1	0	0	1	1	0	1	1	0	2	0	7	2.07826e-05
		I352	0	1	0	0	0	0	0	1	0	3	0	0	1	1	0	7	2.07826e-05
		G312	0	1	0	0	0	2	1	0	0	0	0	0	3	0	0	7	2.07826e-05
		N399	0	0	0	0	2	0	0	0	1	1	2	1	0	0	0	7	2.07826e-05
		N178	0	1	0	1	1	1	0	0	0	0	0	0	1	0	2	7	2.07826e-05
		K564	0	1	0	0	0	0	1	1	2	1	0	0	1	0	0	7	2.07826e-05
		J852	0	1	1	0	0	0	0	2	0	1	0	1	0	0	1	7	2.07826e-05
		C221	0	1	1	0	1	0	0	0	1	2	0	1	0	0	0	7	2.07826e-05
		I060	0	0	2	1	2	0	0	1	0	0	0	1	0	0	0	7	2.07826e-05
		N119	0	0	2	0	0	0	0	1	0	0	2	0	1	1	0	7	2.07826e-05
		W184	0	0	1	0	0	0	1	1	0	0	1	1	1	1	0	7	2.07826e-05
		F200	0	0	1	0	1	0	1	0	0	2	1	0	0	0	1	7	2.07826e-05
		C819	0	0	1	2	0	0	1	1	0	0	1	1	0	0	0	7	2.07826e-05
		B227	0	0	1	2	1	0	0	0	1	1	1	0	0	0	0	7	2.07826e-05
		B651	0	0	1	1	0	0	2	1	0	0	0	0	2	0	0	7	2.07826e-05
		C340	0	0	1	1	0	0	0	0	1	2	0	0	0	1	1	7	2.07826e-05
		D599	0	0	0	1	1	0	0	0	1	1	0	1	1	1	0	7	2.07826e-05
		J431	0	0	0	1	0	1	1	1	2	0	0	1	0	0	0	7	2.07826e-05
		K831	0	0	0	1	0	1	1	1	0	0	0	1	0	1	1	7	2.07826e-05
		W877	0	0	0	0	2	0	0	1	0	0	2	2	0	0	0	7	2.07826e-05
		C929	0	0	0	0	1	1	1	2	0	0	0	0	1	0	1	7	2.07826e-05
		X629	0	0	0	0	1	1	2	1	1	0	0	0	1	0	0	7	2.07826e-05
		J438	0	0	0	0	1	1	0	0	0	0	2	1	0	0	2	7	2.07826e-05
		I632	0	0	0	0	0	2	0	0	0	0	0	0	1	2	2	7	2.07826e-05
		X424	0	0	0	0	0	0	0	0	1	1	1	3	0	0	1	7	2.07826e-05
		Q234	0	0	0	0	0	0	0	0	0	1	1	3	2	0	0	7	2.07826e-05
		B99	2	0	1	1	0	1	0	0	0	0	0	0	0	1	0	6	1.78136e-05
		K639	2	0	0	0	0	0	0	1	0	1	0	1	1	0	0	6	1.78136e-05
		I778	1	0	0	2	0	0	0	0	0	1	1	0	0	1	0	6	1.78136e-05
		K750	1	0	1	0	0	0	0	0	0	1	0	0	1	2	0	6	1.78136e-05
		B550	1	0	0	1	0	0	0	0	3	1	0	0	0	0	0	6	1.78136e-05
		B574	1	1	1	1	1	0	0	0	0	0	0	0	0	0	1	6	1.78136e-05
		K768	1	1	0	0	0	0	0	0	1	0	1	1	1	0	0	6	1.78136e-05
		J182	1	0	0	0	0	1	0	0	0	1	0	2	0	0	1	6	1.78136e-05
		K319	1	0	1	0	0	0	1	1	0	0	0	0	1	0	1	6	1.78136e-05
		B201	1	0	0	0	0	1	0	0	0	1	1	0	1	0	1	6	1.78136e-05
		I850	1	1	0	1	0	0	2	0	0	1	0	0	0	0	0	6	1.78136e-05
		E143	1	0	0	0	0	0	2	0	0	1	0	0	0	2	0	6	1.78136e-05
		I715	1	0	0	0	0	0	1	0	0	0	0	0	1	1	2	6	1.78136e-05
		D65	0	0	0	1	1	0	3	0	0	0	0	0	1	0	0	6	1.78136e-05
		N170	0	0	1	1	0	0	0	1	0	1	1	1	0	0	0	6	1.78136e-05
		J111	0	0	0	0	0	0	0	0	0	1	1	1	0	0	3	6	1.78136e-05
		W060	0	1	0	0	0	0	1	0	0	1	3	0	0	0	0	6	1.78136e-05
		I724	0	1	1	0	0	0	0	1	0	0	2	1	0	0	0	6	1.78136e-05
		E778	0	1	0	1	1	2	0	0	0	0	1	0	0	0	0	6	1.78136e-05
		I348	0	2	0	1	0	0	1	0	0	1	0	0	0	1	0	6	1.78136e-05
		K270	0	2	0	0	0	0	0	0	1	0	0	0	2	0	1	6	1.78136e-05
		N26	0	1	0	0	0	1	1	0	0	1	1	1	0	0	0	6	1.78136e-05
		A35	0	0	0	2	0	0	0	0	1	1	0	2	0	0	0	6	1.78136e-05
		Y159	0	0	0	0	0	0	1	0	1	1	1	1	0	0	1	6	1.78136e-05
		D291	0	1	1	0	0	0	1	1	0	1	0	0	0	0	1	6	1.78136e-05
		C482	0	0	1	0	1	0	1	1	0	0	0	0	0	1	1	6	1.78136e-05
		C348	0	1	0	0	0	0	0	0	1	2	0	0	0	1	1	6	1.78136e-05
		G403	0	0	1	0	1	1	0	1	0	0	0	1	1	0	0	6	1.78136e-05
		C480	0	1	1	0	1	0	0	0	1	0	0	0	2	0	0	6	1.78136e-05
		G419	0	1	1	0	0	0	1	0	1	2	0	0	0	0	0	6	1.78136e-05
		I48	0	1	0	0	0	1	0	0	1	0	0	1	0	0	2	6	1.78136e-05
		M844	0	0	0	0	1	0	0	0	0	0	0	1	2	1	1	6	1.78136e-05
		W179	0	1	0	0	0	0	0	0	0	0	1	0	2	2	0	6	1.78136e-05
		K829	0	0	0	1	1	1	1	0	0	0	1	1	0	0	0	6	1.78136e-05
		J384	0	0	1	0	1	2	1	1	0	0	0	0	0	0	0	6	1.78136e-05
		G410	0	0	1	0	2	1	0	0	1	1	0	0	0	0	0	6	1.78136e-05
		W748	0	0	1	0	0	2	0	0	0	0	0	1	1	1	0	6	1.78136e-05
		J82	0	0	1	0	2	0	1	0	0	1	0	0	0	1	0	6	1.78136e-05
		I878	0	0	0	2	0	3	0	0	0	0	0	1	0	0	0	6	1.78136e-05
		K929	0	0	0	2	0	0	0	1	1	0	0	0	0	0	2	6	1.78136e-05
		E870	0	0	0	1	0	0	1	0	0	1	0	0	0	2	1	6	1.78136e-05
		D570	0	0	0	1	1	0	1	2	1	0	0	0	0	0	0	6	1.78136e-05
		F191	0	0	0	1	0	1	0	0	0	0	1	1	1	0	1	6	1.78136e-05
		L089	0	0	0	0	0	0	1	0	0	0	3	0	0	2	0	6	1.78136e-05
		Q208	0	0	0	0	0	1	1	1	0	1	0	1	0	1	0	6	1.78136e-05
		C729	0	0	0	0	0	0	0	0	0	0	1	3	0	1	1	6	1.78136e-05
		E137	0	0	0	0	0	1	0	1	1	0	0	0	0	1	2	6	1.78136e-05
		D70	0	0	0	0	1	0	1	1	0	0	0	1	1	1	0	6	1.78136e-05
		C945	0	0	0	0	0	0	1	0	0	0	0	1	0	2	2	6	1.78136e-05
		W749	0	0	0	0	0	0	0	1	0	1	1	0	0	1	2	6	1.78136e-05
		A310	0	0	0	0	0	0	0	1	0	0	2	0	1	1	1	6	1.78136e-05
		R960	0	0	0	0	0	0	0	0	0	1	1	0	2	0	2	6	1.78136e-05
		K572	2	0	0	0	0	0	1	0	0	1	0	0	1	0	0	5	1.48447e-05
		M819	1	1	0	0	1	0	0	1	0	0	0	1	0	0	0	5	1.48447e-05
		J219	1	0	0	0	0	0	0	1	0	1	0	2	0	0	0	5	1.48447e-05
		K650	1	0	1	0	0	0	0	0	1	2	0	0	0	0	0	5	1.48447e-05
		E127	1	0	0	0	1	1	0	0	0	1	1	0	0	0	0	5	1.48447e-05
		E786	1	1	0	0	0	0	1	1	0	1	0	0	0	0	0	5	1.48447e-05
		X699	1	0	0	0	1	0	0	0	0	0	1	0	2	0	0	5	1.48447e-05
		N049	1	0	0	0	0	0	0	0	2	0	0	0	0	1	1	5	1.48447e-05
		B659	1	1	1	0	0	1	0	0	0	1	0	0	0	0	0	5	1.48447e-05
		E854	1	0	0	0	0	0	0	0	0	0	1	0	1	1	1	5	1.48447e-05
		G406	1	0	0	0	0	2	1	0	0	0	0	0	0	0	1	5	1.48447e-05
		V475	1	0	0	0	0	0	0	0	2	0	1	1	0	0	0	5	1.48447e-05
		K803	1	0	0	0	0	0	1	0	0	0	0	1	0	1	1	5	1.48447e-05
		I749	0	0	0	1	0	0	0	0	0	1	1	1	0	1	0	5	1.48447e-05
		I339	0	0	0	0	0	0	0	0	0	0	0	1	2	1	1	5	1.48447e-05
		M139	0	0	1	1	1	0	0	0	0	1	0	1	0	0	0	5	1.48447e-05
		J450	0	0	0	1	1	0	0	2	0	0	0	0	1	0	0	5	1.48447e-05
		G930	0	0	0	0	0	0	0	0	0	1	0	0	2	1	1	5	1.48447e-05
		K759	0	2	0	0	0	0	0	2	0	0	0	0	0	1	0	5	1.48447e-05
		I690	0	0	0	0	0	2	0	1	0	0	1	0	0	0	1	5	1.48447e-05
		C410	0	0	0	0	0	0	0	1	0	1	0	1	0	1	1	5	1.48447e-05
		I729	0	0	0	2	1	0	0	0	0	0	0	0	2	0	0	5	1.48447e-05
		I00	0	0	0	0	0	1	0	1	0	0	0	0	1	0	2	5	1.48447e-05
		N059	0	1	1	0	0	2	0	0	0	0	0	1	0	0	0	5	1.48447e-05
		K529	0	1	0	0	1	1	0	0	0	1	0	0	0	0	1	5	1.48447e-05
		G408	0	1	0	0	0	0	1	0	1	0	0	1	1	0	0	5	1.48447e-05
		Q251	0	1	1	0	0	0	0	0	0	0	1	0	2	0	0	5	1.48447e-05
		G621	0	1	0	1	0	0	0	0	1	0	1	0	1	0	0	5	1.48447e-05
		K30	0	1	0	0	0	2	0	0	2	0	0	0	0	0	0	5	1.48447e-05
		X239	0	1	0	1	0	0	0	0	0	0	0	1	0	1	1	5	1.48447e-05
		J168	0	1	0	0	0	0	0	0	0	0	2	2	0	0	0	5	1.48447e-05
		K265	0	1	0	0	0	0	1	0	1	0	0	1	0	1	0	5	1.48447e-05
		X659	0	1	1	0	0	0	0	0	1	1	0	0	0	1	0	5	1.48447e-05
		K573	0	1	0	1	0	1	0	1	0	0	0	0	0	0	1	5	1.48447e-05
		F019	0	1	0	0	1	0	1	2	0	0	0	0	0	0	0	5	1.48447e-05
		I312	0	0	1	1	1	0	0	0	0	1	0	0	1	0	0	5	1.48447e-05
		M512	0	0	1	1	0	0	1	0	0	0	1	0	0	1	0	5	1.48447e-05
		C790	0	0	1	0	0	1	0	1	0	0	0	0	1	1	0	5	1.48447e-05
		V99	0	0	1	0	2	2	0	0	0	0	0	0	0	0	0	5	1.48447e-05
		C139	0	0	1	0	0	0	0	1	1	0	0	0	0	1	1	5	1.48447e-05
		I789	0	0	1	0	0	1	0	0	1	0	1	1	0	0	0	5	1.48447e-05
		X994	0	0	1	0	0	0	0	1	0	1	0	1	1	0	0	5	1.48447e-05
		K404	0	0	1	0	0	0	0	0	1	1	1	0	1	0	0	5	1.48447e-05
		K702	0	0	1	0	1	0	0	0	2	0	0	0	1	0	0	5	1.48447e-05
		W198	0	0	1	0	0	1	1	0	0	0	0	0	0	1	1	5	1.48447e-05
		N411	0	0	1	0	0	1	0	0	0	1	0	0	2	0	0	5	1.48447e-05
		I427	0	0	1	0	0	0	0	2	0	0	0	1	1	0	0	5	1.48447e-05
		K219	0	0	1	0	1	0	0	0	0	0	0	1	2	0	0	5	1.48447e-05
		I120	0	0	1	0	0	0	1	1	0	0	0	0	2	0	0	5	1.48447e-05
		I809	0	0	0	1	1	1	0	0	0	0	0	0	1	1	0	5	1.48447e-05
		J708	0	0	0	0	0	0	0	1	1	1	0	1	1	0	0	5	1.48447e-05
		Y299	0	0	0	0	0	0	0	0	0	0	1	0	1	1	2	5	1.48447e-05
		F108	0	0	0	1	0	1	0	0	0	1	0	0	1	0	1	5	1.48447e-05
		F107	0	0	0	1	0	0	1	0	1	0	1	0	0	1	0	5	1.48447e-05
		C919	0	0	0	1	2	0	0	1	0	1	0	0	0	0	0	5	1.48447e-05
		K439	0	0	0	1	1	0	0	1	1	0	0	0	1	0	0	5	1.48447e-05
		K420	0	0	0	1	0	0	0	0	0	1	1	1	0	1	0	5	1.48447e-05
		K921	0	0	0	0	0	1	0	0	0	1	0	0	1	1	1	5	1.48447e-05
		M349	0	0	0	0	1	0	1	1	0	1	0	0	0	0	1	5	1.48447e-05
		C716	0	0	0	0	1	0	0	1	1	1	0	0	0	0	1	5	1.48447e-05
		C795	0	0	0	0	1	1	0	0	0	1	0	2	0	0	0	5	1.48447e-05
		V899	0	0	0	0	1	0	0	1	0	0	0	2	0	1	0	5	1.48447e-05
		I088	0	0	0	0	1	1	0	0	0	0	1	1	0	1	0	5	1.48447e-05
		D500	0	0	0	0	0	0	1	1	0	0	0	2	0	0	1	5	1.48447e-05
		B559	0	0	0	0	0	1	0	0	1	0	0	1	1	0	1	5	1.48447e-05
		J128	0	0	0	0	0	1	0	0	0	0	0	2	0	0	2	5	1.48447e-05
		V234	0	0	0	0	0	1	1	0	1	1	0	0	1	0	0	5	1.48447e-05
		N038	0	0	0	0	0	0	0	0	0	0	1	1	2	1	0	5	1.48447e-05
		W789	0	0	0	0	0	0	1	0	0	0	0	2	1	1	0	5	1.48447e-05
		K271	0	0	0	0	0	0	0	1	1	1	1	1	0	0	0	5	1.48447e-05
		N079	0	0	0	0	0	0	0	1	1	0	0	1	0	1	1	5	1.48447e-05
		A059	2	0	0	0	0	1	0	0	0	1	0	0	0	0	0	4	1.18757e-05
		D66	2	0	0	1	0	0	0	0	0	0	0	0	0	1	0	4	1.18757e-05
		E662	2	0	0	0	0	0	0	0	0	0	0	0	0	1	1	4	1.18757e-05
		C629	2	0	0	0	0	0	0	1	0	0	0	0	0	1	0	4	1.18757e-05
		A279	1	0	0	0	0	1	0	0	0	0	0	1	0	0	1	4	1.18757e-05
		N288	1	0	0	0	1	0	0	0	0	0	1	0	0	1	0	4	1.18757e-05
		E880	1	0	0	1	0	0	0	0	0	2	0	0	0	0	0	4	1.18757e-05
		M100	1	1	0	0	0	0	0	1	0	0	0	0	0	1	0	4	1.18757e-05
		K509	1	0	0	1	1	0	0	0	0	0	0	1	0	0	0	4	1.18757e-05
		M169	1	0	0	0	0	0	0	0	0	0	0	0	1	1	1	4	1.18757e-05
		K560	1	0	0	1	0	0	0	0	1	0	0	0	0	1	0	4	1.18757e-05
		X700	1	0	0	0	0	0	1	1	0	0	1	0	0	0	0	4	1.18757e-05
		V284	1	0	0	0	0	0	0	0	0	0	1	1	1	0	0	4	1.18757e-05
		K291	1	0	0	0	0	0	0	0	0	0	0	0	1	1	1	4	1.18757e-05
		W062	1	0	0	0	0	0	0	0	1	1	0	0	0	1	0	4	1.18757e-05
		C765	1	0	0	0	0	1	1	0	0	1	0	0	0	0	0	4	1.18757e-05
		K559	1	0	0	0	0	1	0	0	0	0	0	0	1	1	0	4	1.18757e-05
		E128	1	0	0	0	0	1	0	0	0	0	0	0	0	2	0	4	1.18757e-05
		N309	1	0	0	0	0	0	0	1	1	0	0	0	0	1	0	4	1.18757e-05
		B91	1	0	0	0	0	0	0	0	0	0	0	1	1	0	1	4	1.18757e-05
		F119	1	0	0	0	0	1	0	0	1	0	1	0	0	0	0	4	1.18757e-05
		D694	1	0	0	0	0	1	0	0	0	1	0	0	0	1	0	4	1.18757e-05
		I011	1	2	0	0	0	0	0	0	0	0	0	0	0	0	1	4	1.18757e-05
		K804	0	0	0	0	1	0	0	0	1	1	0	1	0	0	0	4	1.18757e-05
		K565	0	0	0	1	0	0	0	0	0	1	1	0	1	0	0	4	1.18757e-05
		K818	0	0	0	0	0	1	1	0	0	0	0	1	1	0	0	4	1.18757e-05
		N159	0	0	1	0	0	0	1	0	0	1	1	0	0	0	0	4	1.18757e-05
		K739	0	1	0	1	0	0	1	0	0	0	0	0	0	1	0	4	1.18757e-05
		G909	0	2	0	0	0	0	0	0	1	0	1	0	0	0	0	4	1.18757e-05
		F190	0	0	0	0	0	0	1	1	1	0	1	0	0	0	0	4	1.18757e-05
		D759	0	0	0	0	0	0	1	0	0	0	0	0	2	0	1	4	1.18757e-05
		E049	0	0	0	0	0	2	0	0	1	1	0	0	0	0	0	4	1.18757e-05
		M869	0	1	0	0	1	0	0	0	0	0	0	0	1	0	1	4	1.18757e-05
		F430	0	0	0	0	1	0	1	1	0	1	0	0	0	0	0	4	1.18757e-05
		K590	0	0	1	1	0	0	2	0	0	0	0	0	0	0	0	4	1.18757e-05
		N111	0	0	0	0	0	0	0	0	0	1	0	1	0	0	2	4	1.18757e-05
		K255	0	0	1	0	0	0	0	0	0	1	0	0	0	1	1	4	1.18757e-05
		I078	0	1	0	1	0	0	0	1	0	1	0	0	0	0	0	4	1.18757e-05
		E079	0	0	1	0	0	0	1	0	1	0	0	0	0	1	0	4	1.18757e-05
		Q203	0	1	0	0	0	1	0	1	0	0	0	0	1	0	0	4	1.18757e-05
		I615	0	1	0	0	1	0	0	0	0	0	1	1	0	0	0	4	1.18757e-05
		C97	0	0	3	0	0	0	0	0	0	0	0	1	0	0	0	4	1.18757e-05
		I808	0	0	2	0	0	0	0	1	0	0	0	0	1	0	0	4	1.18757e-05
		I139	0	0	2	1	0	0	0	0	0	0	0	0	1	0	0	4	1.18757e-05
		X209	0	0	1	0	2	0	0	0	0	0	0	0	0	1	0	4	1.18757e-05
		M348	0	0	1	0	0	0	1	0	0	0	0	1	0	1	0	4	1.18757e-05
		B551	0	0	1	1	0	1	0	0	0	0	0	0	0	1	0	4	1.18757e-05
		I829	0	0	1	0	0	0	0	0	0	1	0	0	0	1	1	4	1.18757e-05
		I361	0	0	1	0	1	0	0	0	0	1	1	0	0	0	0	4	1.18757e-05
		Q211	0	0	0	0	0	0	0	0	0	0	0	1	2	0	1	4	1.18757e-05
		Y835	0	0	0	0	0	1	0	1	0	0	0	0	1	1	0	4	1.18757e-05
		Q256	0	0	0	0	1	0	1	1	0	0	0	1	0	0	0	4	1.18757e-05
		I631	0	0	0	0	1	0	0	0	1	1	0	0	0	1	0	4	1.18757e-05
		G09	0	0	0	0	1	1	0	0	1	1	0	0	0	0	0	4	1.18757e-05
		W790	0	0	0	1	0	0	0	0	3	0	0	0	0	0	0	4	1.18757e-05
		C785	0	0	0	2	0	0	1	1	0	0	0	0	0	0	0	4	1.18757e-05
		V485	0	0	0	2	0	0	0	0	2	0	0	0	0	0	0	4	1.18757e-05
		E720	0	0	0	1	0	0	0	0	0	2	0	0	1	0	0	4	1.18757e-05
		I958	0	0	0	1	0	0	0	1	0	0	0	1	1	0	0	4	1.18757e-05
		A219	0	0	0	1	0	0	1	0	0	0	0	0	0	2	0	4	1.18757e-05
		C678	0	0	0	1	0	0	0	0	0	0	1	1	1	0	0	4	1.18757e-05
		G610	0	0	0	1	0	0	0	1	1	0	0	0	0	0	1	4	1.18757e-05
		I610	0	0	0	1	0	0	0	0	0	0	1	0	0	0	2	4	1.18757e-05
		K449	0	0	0	0	0	0	2	0	0	2	0	0	0	0	0	4	1.18757e-05
		N139	0	0	0	0	2	1	0	0	0	0	0	0	0	1	0	4	1.18757e-05
		W192	0	0	0	0	1	0	0	0	2	1	0	0	0	0	0	4	1.18757e-05
		K260	0	0	0	0	1	0	0	0	1	0	0	0	1	1	0	4	1.18757e-05
		I300	0	0	0	0	0	0	0	0	1	0	0	2	0	1	0	4	1.18757e-05
		I081	0	0	0	0	1	0	0	0	2	0	0	0	1	0	0	4	1.18757e-05
		C248	0	0	0	0	0	0	1	0	1	0	1	0	0	0	1	4	1.18757e-05
		E888	0	0	0	0	0	0	0	0	0	1	0	1	0	0	2	4	1.18757e-05
		M628	0	0	0	0	0	1	0	0	0	0	1	0	1	1	0	4	1.18757e-05
		K599	0	0	0	0	1	0	1	0	0	0	0	0	1	1	0	4	1.18757e-05
		I740	0	0	0	0	0	0	1	1	0	0	0	0	0	1	1	4	1.18757e-05
		E220	0	0	0	0	0	2	0	0	1	0	0	0	0	1	0	4	1.18757e-05
		D735	0	0	0	0	0	1	1	0	1	1	0	0	0	0	0	4	1.18757e-05
		C751	0	0	0	0	0	0	0	0	0	0	1	0	2	1	0	4	1.18757e-05
		F140	0	0	0	0	0	1	0	0	1	0	0	0	0	2	0	4	1.18757e-05
		W699	0	0	0	0	0	1	0	0	0	1	0	0	1	0	1	4	1.18757e-05
		F171	0	0	0	0	0	1	0	1	0	0	1	1	0	0	0	4	1.18757e-05
		Y86	0	0	0	0	0	0	1	0	0	0	0	3	0	0	0	4	1.18757e-05
		A199	0	0	0	0	0	1	0	0	1	0	0	0	2	0	0	4	1.18757e-05
		C182	0	0	0	0	0	0	0	1	0	0	0	0	0	1	2	4	1.18757e-05
		C119	0	0	0	0	0	0	0	2	0	0	1	0	1	0	0	4	1.18757e-05
		E103	0	0	0	0	0	0	0	2	1	0	0	0	0	0	1	4	1.18757e-05
		J118	0	0	0	0	0	0	2	2	0	0	0	0	0	0	0	4	1.18757e-05
		I828	0	0	0	0	0	0	0	0	1	0	0	1	0	1	1	4	1.18757e-05
		N498	0	0	0	0	0	0	1	0	2	0	1	0	0	0	0	4	1.18757e-05
		C341	0	0	0	0	0	0	1	0	0	0	2	0	0	1	0	4	1.18757e-05
		I408	0	0	0	0	0	0	0	2	0	0	0	1	0	0	1	4	1.18757e-05
		E15	0	0	0	0	0	0	0	1	1	0	0	0	0	0	2	4	1.18757e-05
		Y149	0	0	0	0	0	0	0	0	0	0	0	1	1	1	1	4	1.18757e-05
		K740	0	0	0	0	0	0	0	1	0	0	1	0	1	0	1	4	1.18757e-05
		I280	0	0	0	0	0	0	0	0	0	1	1	0	1	1	0	4	1.18757e-05
		E441	0	0	0	0	0	0	0	0	0	1	0	1	1	1	0	4	1.18757e-05
		J209	2	0	0	1	0	0	0	0	0	0	0	0	0	0	0	3	8.90681e-06
		D377	2	0	0	0	0	0	1	0	0	0	0	0	0	0	0	3	8.90681e-06
		Q782	1	1	1	0	0	0	0	0	0	0	0	0	0	0	0	3	8.90681e-06
		K868	1	0	0	0	1	0	0	0	0	0	1	0	0	0	0	3	8.90681e-06
		B203	1	0	0	0	0	0	1	0	0	0	0	1	0	0	0	3	8.90681e-06
		I289	1	0	0	0	0	1	0	0	1	0	0	0	0	0	0	3	8.90681e-06
		K256	1	0	0	0	0	0	0	0	0	0	0	0	0	1	1	3	8.90681e-06
		W557	1	0	1	1	0	0	0	0	0	0	0	0	0	0	0	3	8.90681e-06
		I400	1	0	0	0	0	1	0	0	0	0	0	0	0	1	0	3	8.90681e-06
		J451	1	0	0	0	1	0	1	0	0	0	0	0	0	0	0	3	8.90681e-06
		D489	1	0	0	0	0	0	0	1	0	0	0	0	0	0	1	3	8.90681e-06
		B200	1	0	0	0	0	1	0	0	0	0	1	0	0	0	0	3	8.90681e-06
		D464	1	1	0	0	0	0	0	1	0	0	0	0	0	0	0	3	8.90681e-06
		C328	1	0	0	0	0	0	0	0	0	1	0	0	1	0	0	3	8.90681e-06
		V031	1	1	0	0	0	0	1	0	0	0	0	0	0	0	0	3	8.90681e-06
		E050	0	0	2	0	0	0	0	0	0	0	0	1	0	0	0	3	8.90681e-06
		L97	0	0	0	0	0	0	0	1	0	0	1	0	1	0	0	3	8.90681e-06
		I425	0	0	0	0	0	0	0	0	0	2	0	0	1	0	0	3	8.90681e-06
		N133	0	0	0	0	0	0	0	0	0	2	0	0	0	0	1	3	8.90681e-06
		E120	0	0	0	0	1	0	1	0	1	0	0	0	0	0	0	3	8.90681e-06
		K808	0	0	0	0	0	0	0	0	0	0	0	0	3	0	0	3	8.90681e-06
		E835	0	0	1	0	1	0	0	0	0	0	0	0	1	0	0	3	8.90681e-06
		V021	0	0	0	1	0	0	0	1	1	0	0	0	0	0	0	3	8.90681e-06
		K833	0	2	0	0	0	0	0	0	0	0	0	1	0	0	0	3	8.90681e-06
		K430	0	1	1	0	0	0	0	0	0	1	0	0	0	0	0	3	8.90681e-06
		J100	0	1	1	1	0	0	0	0	0	0	0	0	0	0	0	3	8.90681e-06
		F99	0	0	0	0	0	0	0	0	0	2	0	0	0	1	0	3	8.90681e-06
		J13	0	0	0	0	0	0	0	0	0	0	1	0	1	0	1	3	8.90681e-06
		E122	0	1	0	0	0	0	0	0	1	0	0	1	0	0	0	3	8.90681e-06
		Q259	0	1	0	0	1	0	0	0	0	0	0	0	0	0	1	3	8.90681e-06
		I723	0	1	0	0	1	0	0	0	0	0	1	0	0	0	0	3	8.90681e-06
		G589	0	1	1	1	0	0	0	0	0	0	0	0	0	0	0	3	8.90681e-06
		E748	0	1	0	0	0	0	0	0	1	1	0	0	0	0	0	3	8.90681e-06
		K638	0	1	1	0	0	0	0	0	0	0	0	0	0	1	0	3	8.90681e-06
		E640	0	0	0	1	1	0	0	0	0	0	1	0	0	0	0	3	8.90681e-06
		Q239	0	1	1	0	0	1	0	0	0	0	0	0	0	0	0	3	8.90681e-06
		J691	0	1	0	0	0	0	1	0	0	0	0	1	0	0	0	3	8.90681e-06
		J840	0	1	0	0	0	0	0	0	0	1	0	0	1	0	0	3	8.90681e-06
		K571	0	0	0	0	1	0	0	0	0	0	0	1	0	1	0	3	8.90681e-06
		K299	0	0	1	0	0	1	0	0	0	0	0	0	0	0	1	3	8.90681e-06
		Y099	0	1	0	0	0	0	0	0	0	1	0	0	0	1	0	3	8.90681e-06
		D728	0	1	0	0	0	1	0	0	0	0	1	0	0	0	0	3	8.90681e-06
		E831	0	1	0	0	0	0	0	0	0	0	0	0	0	2	0	3	8.90681e-06
		I309	0	0	1	0	0	0	0	0	0	0	1	0	0	1	0	3	8.90681e-06
		G119	0	0	0	0	0	0	0	0	1	0	0	0	1	1	0	3	8.90681e-06
		I342	0	0	0	0	0	0	0	0	1	0	0	0	0	2	0	3	8.90681e-06
		D471	0	0	0	0	0	0	0	1	0	0	1	0	1	0	0	3	8.90681e-06
		I849	0	0	1	0	0	0	1	0	0	0	1	0	0	0	0	3	8.90681e-06
		E729	0	1	0	0	1	0	0	0	0	0	1	0	0	0	0	3	8.90681e-06
		R99	0	1	1	0	0	0	0	0	0	0	0	1	0	0	0	3	8.90681e-06
		C148	0	1	0	0	0	1	0	0	1	0	0	0	0	0	0	3	8.90681e-06
		G628	0	0	2	0	0	0	0	0	0	0	0	0	0	1	0	3	8.90681e-06
		J677	0	0	2	0	0	0	0	0	1	0	0	0	0	0	0	3	8.90681e-06
		I091	0	0	1	0	0	0	0	0	0	0	1	1	0	0	0	3	8.90681e-06
		W708	0	0	1	0	0	0	0	0	0	0	0	1	0	1	0	3	8.90681e-06
		D219	0	0	1	0	0	0	0	0	0	0	0	1	0	1	0	3	8.90681e-06
		I630	0	0	1	0	1	0	0	0	0	0	0	0	0	0	1	3	8.90681e-06
		E799	0	0	1	0	0	0	0	0	0	0	0	0	0	1	1	3	8.90681e-06
		C184	0	0	1	0	0	0	0	0	0	0	0	0	1	1	0	3	8.90681e-06
		K413	0	0	1	0	0	0	0	0	1	0	1	0	0	0	0	3	8.90681e-06
		W878	0	0	1	0	0	0	1	0	0	0	0	0	0	1	0	3	8.90681e-06
		C188	0	0	1	0	0	1	0	0	0	0	1	0	0	0	0	3	8.90681e-06
		B181	0	0	1	0	0	0	0	0	0	2	0	0	0	0	0	3	8.90681e-06
		I800	0	0	1	0	0	0	1	1	0	0	0	0	0	0	0	3	8.90681e-06
		C444	0	0	1	0	0	0	0	0	0	0	2	0	0	0	0	3	8.90681e-06
		X620	0	0	1	0	0	0	0	0	0	0	1	0	0	0	1	3	8.90681e-06
		E249	0	0	0	0	0	0	1	0	1	0	0	0	0	1	0	3	8.90681e-06
		E876	0	0	0	0	0	0	0	1	0	1	0	0	0	1	0	3	8.90681e-06
		C07	0	0	0	0	0	1	0	0	0	0	0	0	0	0	2	3	8.90681e-06
		J458	0	0	0	0	0	0	0	2	0	0	0	0	0	1	0	3	8.90681e-06
		C720	0	0	0	0	0	1	0	1	0	0	1	0	0	0	0	3	8.90681e-06
		D430	0	0	0	1	0	0	1	1	0	0	0	0	0	0	0	3	8.90681e-06
		C210	0	0	0	1	0	0	1	0	1	0	0	0	0	0	0	3	8.90681e-06
		C445	0	0	0	1	0	0	0	0	0	2	0	0	0	0	0	3	8.90681e-06
		M313	0	0	0	1	0	0	1	0	0	0	0	1	0	0	0	3	8.90681e-06
		C749	0	0	0	1	1	0	0	0	0	1	0	0	0	0	0	3	8.90681e-06
		C699	0	0	0	1	0	0	0	0	0	1	0	0	0	1	0	3	8.90681e-06
		E709	0	0	0	1	1	0	0	0	1	0	0	0	0	0	0	3	8.90681e-06
		Q213	0	0	0	0	0	0	0	0	0	0	1	0	2	0	0	3	8.90681e-06
		K296	0	0	0	0	0	0	0	1	0	0	0	0	1	0	1	3	8.90681e-06
		I607	0	0	0	0	0	0	1	0	0	0	0	0	0	1	1	3	8.90681e-06
		I728	0	0	0	0	0	0	0	0	1	0	0	0	2	0	0	3	8.90681e-06
		B949	0	0	0	0	3	0	0	0	0	0	0	0	0	0	0	3	8.90681e-06
		M009	0	0	0	0	1	0	0	0	0	1	0	1	0	0	0	3	8.90681e-06
		E161	0	0	0	0	2	0	0	0	0	0	0	1	0	0	0	3	8.90681e-06
		M479	0	0	0	0	1	0	0	1	0	0	1	0	0	0	0	3	8.90681e-06
		K429	0	0	0	0	1	1	1	0	0	0	0	0	0	0	0	3	8.90681e-06
		D383	0	0	0	0	1	0	0	0	1	0	1	0	0	0	0	3	8.90681e-06
		G10	0	0	0	0	0	0	0	0	0	0	1	0	1	1	0	3	8.90681e-06
		X337	0	0	0	0	0	1	0	1	0	0	0	0	1	0	0	3	8.90681e-06
		I722	0	0	0	0	1	0	1	0	0	0	0	1	0	0	0	3	8.90681e-06
		A409	0	0	0	0	1	0	0	0	0	1	0	1	0	0	0	3	8.90681e-06
		G458	0	0	0	0	0	0	1	0	1	1	0	0	0	0	0	3	8.90681e-06
		D589	0	0	0	0	1	1	0	0	0	0	0	1	0	0	0	3	8.90681e-06
		Y219	0	0	0	0	1	0	0	0	0	0	0	0	0	1	1	3	8.90681e-06
		A159	0	0	0	0	1	0	0	0	1	0	0	1	0	0	0	3	8.90681e-06
		C414	0	0	0	0	1	0	0	0	1	0	0	0	0	1	0	3	8.90681e-06
		V489	0	0	0	0	1	0	0	0	0	1	0	1	0	0	0	3	8.90681e-06
		K632	0	0	0	0	1	0	0	0	0	0	0	0	1	0	1	3	8.90681e-06
		N368	0	0	0	0	1	0	0	2	0	0	0	0	0	0	0	3	8.90681e-06
		C161	0	0	0	0	1	0	0	1	0	0	0	0	0	1	0	3	8.90681e-06
		Q209	0	0	0	0	0	1	0	1	0	0	1	0	0	0	0	3	8.90681e-06
		K261	0	0	0	0	0	1	0	1	0	0	0	0	1	0	0	3	8.90681e-06
		C851	0	0	0	0	0	0	0	0	0	0	1	0	0	1	1	3	8.90681e-06
		C180	0	0	0	0	0	0	0	1	0	1	0	1	0	0	0	3	8.90681e-06
		B402	0	0	0	0	0	1	0	0	0	1	0	0	0	1	0	3	8.90681e-06
		X649	0	0	0	0	0	0	1	0	0	0	0	0	1	1	0	3	8.90681e-06
		Q619	0	0	0	0	0	1	1	0	0	0	0	1	0	0	0	3	8.90681e-06
		C791	0	0	0	0	0	0	0	0	1	1	0	0	0	0	1	3	8.90681e-06
		E242	0	0	0	0	0	1	0	0	1	0	0	0	0	1	0	3	8.90681e-06
		Q219	0	0	0	0	0	0	1	0	0	0	0	0	1	0	1	3	8.90681e-06
		E649	0	0	0	0	0	0	2	1	0	0	0	0	0	0	0	3	8.90681e-06
		Y090	0	0	0	0	0	0	2	0	0	0	0	0	1	0	0	3	8.90681e-06
		L031	0	0	0	0	0	0	0	0	0	0	0	1	2	0	0	3	8.90681e-06
		C833	0	0	0	0	0	0	1	0	0	0	0	0	1	1	0	3	8.90681e-06
		F439	0	0	0	0	0	0	1	1	0	0	1	0	0	0	0	3	8.90681e-06
		I720	0	0	0	0	0	0	1	0	0	0	0	2	0	0	0	3	8.90681e-06
		I692	0	0	0	0	0	0	1	0	1	1	0	0	0	0	0	3	8.90681e-06
		Q336	0	0	0	0	0	0	1	0	0	1	0	0	0	1	0	3	8.90681e-06
		X440	0	0	0	0	0	0	1	0	0	0	0	0	0	1	1	3	8.90681e-06
		D479	0	0	0	0	0	0	1	0	0	1	0	0	0	0	1	3	8.90681e-06
		W840	0	0	0	0	0	0	1	0	0	2	0	0	0	0	0	3	8.90681e-06
		V280	0	0	0	0	0	0	1	0	1	0	0	1	0	0	0	3	8.90681e-06
		W182	0	0	0	0	0	0	1	0	0	1	1	0	0	0	0	3	8.90681e-06
		I635	0	0	0	0	0	0	0	2	0	0	0	0	1	0	0	3	8.90681e-06
		W854	0	0	0	0	0	0	0	1	0	0	0	0	0	1	1	3	8.90681e-06
		E871	0	0	0	0	0	0	0	1	0	0	0	0	1	1	0	3	8.90681e-06
		E135	0	0	0	0	0	0	0	0	1	0	1	0	1	0	0	3	8.90681e-06
		Q230	0	0	0	0	0	0	0	0	0	0	0	0	1	2	0	3	8.90681e-06
		A267	0	0	0	0	0	0	0	1	1	0	0	0	1	0	0	3	8.90681e-06
		I090	0	0	0	0	0	0	0	0	2	0	0	0	0	0	1	3	8.90681e-06
		K828	0	0	0	0	0	0	0	0	0	1	1	0	1	0	0	3	8.90681e-06
		W874	0	0	0	0	0	0	0	0	1	1	0	1	0	0	0	3	8.90681e-06
		X230	0	0	0	0	0	0	0	0	1	0	0	2	0	0	0	3	8.90681e-06
		C059	0	0	0	0	0	0	0	0	1	1	0	1	0	0	0	3	8.90681e-06
		C218	0	0	0	0	0	0	0	0	0	1	1	0	0	0	1	3	8.90681e-06
		Y004	0	0	0	0	0	0	0	0	0	1	0	1	0	1	0	3	8.90681e-06
		C969	0	0	0	0	0	0	0	0	0	1	0	0	2	0	0	3	8.90681e-06
		E349	0	0	0	0	0	0	0	0	0	1	1	0	1	0	0	3	8.90681e-06
		A929	0	0	0	0	0	0	0	0	0	0	2	1	0	0	0	3	8.90681e-06
		C158	0	0	0	0	0	0	0	0	0	0	1	0	0	0	2	3	8.90681e-06
		V435	0	0	0	0	0	0	0	0	0	0	0	1	1	1	0	3	8.90681e-06
		C342	0	0	0	0	0	0	0	0	0	0	0	1	0	2	0	3	8.90681e-06
		C839	0	0	0	0	0	0	0	0	0	0	0	0	1	0	2	3	8.90681e-06
		J157	1	1	0	0	0	0	0	0	0	0	0	0	0	0	0	2	5.93787e-06
		P570	1	0	0	0	0	0	0	0	0	0	0	1	0	0	0	2	5.93787e-06
		Y280	1	0	0	0	1	0	0	0	0	0	0	0	0	0	0	2	5.93787e-06
		N328	1	0	0	0	0	1	0	0	0	0	0	0	0	0	0	2	5.93787e-06
		K610	1	0	0	0	1	0	0	0	0	0	0	0	0	0	0	2	5.93787e-06
		W690	1	0	1	0	0	0	0	0	0	0	0	0	0	0	0	2	5.93787e-06
		Y248	1	0	0	0	0	0	0	0	0	0	0	0	1	0	0	2	5.93787e-06
		Q238	1	0	0	0	0	0	1	0	0	0	0	0	0	0	0	2	5.93787e-06
		B178	1	0	1	0	0	0	0	0	0	0	0	0	0	0	0	2	5.93787e-06
		N280	1	0	0	1	0	0	0	0	0	0	0	0	0	0	0	2	5.93787e-06
		I600	1	0	1	0	0	0	0	0	0	0	0	0	0	0	0	2	5.93787e-06
		G728	1	1	0	0	0	0	0	0	0	0	0	0	0	0	0	2	5.93787e-06
		M511	1	0	0	0	0	0	0	0	0	0	0	1	0	0	0	2	5.93787e-06
		I281	1	0	0	0	0	0	0	0	1	0	0	0	0	0	0	2	5.93787e-06
		B171	1	0	0	0	0	0	0	0	0	1	0	0	0	0	0	2	5.93787e-06
		B410	1	0	0	0	0	0	0	1	0	0	0	0	0	0	0	2	5.93787e-06
		E129	1	0	0	0	0	0	0	0	0	0	0	0	1	0	0	2	5.93787e-06
		W848	1	0	0	0	0	0	0	0	0	0	1	0	0	0	0	2	5.93787e-06
		G951	1	0	0	0	0	1	0	0	0	0	0	0	0	0	0	2	5.93787e-06
		V294	1	0	0	0	0	0	0	0	0	0	0	1	0	0	0	2	5.93787e-06
		G936	0	0	0	0	0	1	0	0	1	0	0	0	0	0	0	2	5.93787e-06
		E131	0	0	0	1	0	1	0	0	0	0	0	0	0	0	0	2	5.93787e-06
		D320	0	0	0	0	0	0	0	0	1	0	0	0	1	0	0	2	5.93787e-06
		A180	0	0	0	0	1	0	1	0	0	0	0	0	0	0	0	2	5.93787e-06
		G709	0	1	1	0	0	0	0	0	0	0	0	0	0	0	0	2	5.93787e-06
		B029	0	0	0	0	1	0	0	1	0	0	0	0	0	0	0	2	5.93787e-06
		K229	0	0	0	0	0	2	0	0	0	0	0	0	0	0	0	2	5.93787e-06
		I859	0	0	0	0	0	0	1	0	0	0	0	1	0	0	0	2	5.93787e-06
		C761	0	0	0	0	0	1	0	0	0	0	0	0	1	0	0	2	5.93787e-06
		F149	0	0	1	0	0	0	0	0	0	0	0	0	0	0	1	2	5.93787e-06
		M311	0	0	0	0	0	0	1	0	0	1	0	0	0	0	0	2	5.93787e-06
		C951	0	1	0	0	1	0	0	0	0	0	0	0	0	0	0	2	5.93787e-06
		V800	0	0	0	0	0	1	0	0	0	1	0	0	0	0	0	2	5.93787e-06
		K20	0	0	0	0	1	0	0	0	0	0	0	0	1	0	0	2	5.93787e-06
		I098	0	1	0	1	0	0	0	0	0	0	0	0	0	0	0	2	5.93787e-06
		K221	0	1	0	0	0	0	0	1	0	0	0	0	0	0	0	2	5.93787e-06
		C763	0	0	0	0	1	0	0	0	0	0	1	0	0	0	0	2	5.93787e-06
		A305	0	1	0	0	0	0	0	0	0	0	1	0	0	0	0	2	5.93787e-06
		Q221	0	0	0	0	1	0	0	0	0	0	0	0	1	0	0	2	5.93787e-06
		G039	0	0	1	0	0	0	0	0	0	1	0	0	0	0	0	2	5.93787e-06
		E274	0	0	1	0	0	1	0	0	0	0	0	0	0	0	0	2	5.93787e-06
		A319	0	1	0	0	0	0	0	0	0	0	1	0	0	0	0	2	5.93787e-06
		Y189	0	1	0	0	0	0	0	0	0	1	0	0	0	0	0	2	5.93787e-06
		B162	0	1	0	0	0	0	0	0	0	0	1	0	0	0	0	2	5.93787e-06
		K318	0	1	1	0	0	0	0	0	0	0	0	0	0	0	0	2	5.93787e-06
		F162	0	1	0	0	0	0	0	0	0	0	1	0	0	0	0	2	5.93787e-06
		P209	0	1	0	0	0	1	0	0	0	0	0	0	0	0	0	2	5.93787e-06
		N058	0	1	0	0	0	0	0	0	0	0	0	0	1	0	0	2	5.93787e-06
		Q899	0	0	0	0	1	0	0	0	0	0	0	0	0	1	0	2	5.93787e-06
		J860	0	1	0	0	0	0	0	1	0	0	0	0	0	0	0	2	5.93787e-06
		D350	0	1	0	0	0	0	1	0	0	0	0	0	0	0	0	2	5.93787e-06
		I370	0	1	0	0	0	0	0	0	1	0	0	0	0	0	0	2	5.93787e-06
		J101	0	0	0	0	0	0	1	0	0	0	0	0	0	1	0	2	5.93787e-06
		E859	0	0	0	0	1	0	0	0	0	1	0	0	0	0	0	2	5.93787e-06
		D331	0	1	0	0	0	0	0	0	0	0	0	0	0	0	1	2	5.93787e-06
		V134	0	1	0	0	1	0	0	0	0	0	0	0	0	0	0	2	5.93787e-06
		W809	0	1	0	0	0	0	0	0	0	0	0	0	1	0	0	2	5.93787e-06
		J689	0	1	0	1	0	0	0	0	0	0	0	0	0	0	0	2	5.93787e-06
		C782	0	1	0	0	0	0	0	0	0	0	0	0	0	0	1	2	5.93787e-06
		V139	0	0	2	0	0	0	0	0	0	0	0	0	0	0	0	2	5.93787e-06
		V809	0	0	2	0	0	0	0	0	0	0	0	0	0	0	0	2	5.93787e-06
		Q220	0	0	1	0	0	0	0	0	0	0	0	0	0	0	1	2	5.93787e-06
		E702	0	0	1	0	0	1	0	0	0	0	0	0	0	0	0	2	5.93787e-06
		K269	0	0	1	0	1	0	0	0	0	0	0	0	0	0	0	2	5.93787e-06
		E52	0	0	1	0	0	0	0	0	0	0	0	0	1	0	0	2	5.93787e-06
		K625	0	0	1	0	0	0	0	0	0	0	0	1	0	0	0	2	5.93787e-06
		E133	0	0	1	0	0	0	0	0	0	0	0	0	1	0	0	2	5.93787e-06
		X090	0	0	1	0	0	0	0	0	0	0	0	1	0	0	0	2	5.93787e-06
		I772	0	0	1	0	0	0	0	1	0	0	0	0	0	0	0	2	5.93787e-06
		I301	0	0	1	0	1	0	0	0	0	0	0	0	0	0	0	2	5.93787e-06
		G308	0	0	1	0	0	0	0	0	0	0	0	0	0	0	1	2	5.93787e-06
		K661	0	0	1	0	1	0	0	0	0	0	0	0	0	0	0	2	5.93787e-06
		N308	0	0	1	0	0	0	0	0	0	0	1	0	0	0	0	2	5.93787e-06
		I310	0	0	1	0	0	0	0	0	0	0	0	0	0	0	1	2	5.93787e-06
		D180	0	0	1	0	0	0	0	1	0	0	0	0	0	0	0	2	5.93787e-06
		X709	0	0	1	0	0	0	0	0	0	0	0	0	1	0	0	2	5.93787e-06
		J938	0	0	1	0	0	1	0	0	0	0	0	0	0	0	0	2	5.93787e-06
		V092	0	0	1	0	0	0	0	0	0	1	0	0	0	0	0	2	5.93787e-06
		K593	0	0	0	0	0	0	1	1	0	0	0	0	0	0	0	2	5.93787e-06
		G060	0	0	0	0	0	2	0	0	0	0	0	0	0	0	0	2	5.93787e-06
		C380	0	0	0	0	0	0	0	0	0	0	0	1	0	0	1	2	5.93787e-06
		C168	0	0	0	0	0	0	0	1	0	0	0	0	0	0	1	2	5.93787e-06
		G700	0	0	0	0	0	0	1	0	0	1	0	0	0	0	0	2	5.93787e-06
		E725	0	0	0	0	0	0	0	0	1	0	0	1	0	0	0	2	5.93787e-06
		C152	0	0	0	0	0	0	0	1	0	0	0	0	0	0	1	2	5.93787e-06
		W191	0	0	0	0	0	0	0	0	0	1	0	0	0	0	1	2	5.93787e-06
		D591	0	0	0	2	0	0	0	0	0	0	0	0	0	0	0	2	5.93787e-06
		F333	0	0	0	2	0	0	0	0	0	0	0	0	0	0	0	2	5.93787e-06
		G938	0	0	0	1	0	0	0	0	1	0	0	0	0	0	0	2	5.93787e-06
		B690	0	0	0	1	0	0	1	0	0	0	0	0	0	0	0	2	5.93787e-06
		I288	0	0	0	1	1	0	0	0	0	0	0	0	0	0	0	2	5.93787e-06
		C845	0	0	0	1	0	1	0	0	0	0	0	0	0	0	0	2	5.93787e-06
		B222	0	0	0	1	0	1	0	0	0	0	0	0	0	0	0	2	5.93787e-06
		J960	0	0	0	1	0	0	0	0	0	0	0	1	0	0	0	2	5.93787e-06
		A300	0	0	0	1	0	0	1	0	0	0	0	0	0	0	0	2	5.93787e-06
		K839	0	0	0	1	0	0	0	0	0	0	1	0	0	0	0	2	5.93787e-06
		I959	0	0	0	1	0	0	0	0	0	1	0	0	0	0	0	2	5.93787e-06
		C793	0	0	0	1	0	0	1	0	0	0	0	0	0	0	0	2	5.93787e-06
		M352	0	0	0	1	0	0	0	0	0	0	0	0	0	0	1	2	5.93787e-06
		N210	0	0	0	1	0	0	0	0	0	0	0	1	0	0	0	2	5.93787e-06
		X950	0	0	0	1	0	0	1	0	0	0	0	0	0	0	0	2	5.93787e-06
		A165	0	0	0	1	0	0	0	0	0	0	0	1	0	0	0	2	5.93787e-06
		K351	0	0	0	1	0	0	0	0	0	0	0	1	0	0	0	2	5.93787e-06
		I517	0	0	0	0	0	0	0	0	0	0	0	0	1	0	1	2	5.93787e-06
		Q250	0	0	0	0	0	1	0	0	0	0	0	0	1	0	0	2	5.93787e-06
		R54	0	0	0	0	0	0	0	1	0	0	0	0	1	0	0	2	5.93787e-06
		J942	0	0	0	0	0	0	0	0	0	0	0	1	0	0	1	2	5.93787e-06
		J152	0	0	0	0	0	0	0	0	0	1	0	0	1	0	0	2	5.93787e-06
		Y831	0	0	0	0	0	0	0	0	0	0	0	0	0	1	1	2	5.93787e-06
		E069	0	0	0	0	0	0	0	2	0	0	0	0	0	0	0	2	5.93787e-06
		J150	0	0	0	0	0	0	0	0	0	0	0	0	1	0	1	2	5.93787e-06
		V685	0	0	0	0	1	0	0	0	0	0	0	0	1	0	0	2	5.93787e-06
		E259	0	0	0	0	1	0	0	0	0	0	0	0	0	1	0	2	5.93787e-06
		I951	0	0	0	0	1	0	0	0	1	0	0	0	0	0	0	2	5.93787e-06
		C060	0	0	0	0	1	0	0	0	0	0	1	0	0	0	0	2	5.93787e-06
		C689	0	0	0	0	1	0	0	0	0	0	0	0	0	1	0	2	5.93787e-06
		I018	0	0	0	0	1	0	0	0	0	0	0	1	0	0	0	2	5.93787e-06
		E038	0	0	0	0	1	0	0	0	1	0	0	0	0	0	0	2	5.93787e-06
		B206	0	0	0	0	1	0	0	0	0	0	0	0	0	0	1	2	5.93787e-06
		I130	0	0	0	0	1	0	0	0	0	0	0	0	0	0	1	2	5.93787e-06
		A047	0	0	0	0	1	0	0	0	0	0	0	0	0	1	0	2	5.93787e-06
		I012	0	0	0	0	1	1	0	0	0	0	0	0	0	0	0	2	5.93787e-06
		N142	0	0	0	0	1	0	0	0	0	0	1	0	0	0	0	2	5.93787e-06
		B209	0	0	0	0	1	0	0	1	0	0	0	0	0	0	0	2	5.93787e-06
		X930	0	0	0	0	1	0	0	0	0	0	0	0	0	0	1	2	5.93787e-06
		J948	0	0	0	0	1	0	0	0	0	0	1	0	0	0	0	2	5.93787e-06
		Q330	0	0	0	0	1	0	0	0	1	0	0	0	0	0	0	2	5.93787e-06
		E130	0	0	0	0	0	0	0	1	1	0	0	0	0	0	0	2	5.93787e-06
		G049	0	0	0	0	0	0	0	0	0	0	0	2	0	0	0	2	5.93787e-06
		M469	0	0	0	0	1	0	0	0	0	0	0	0	0	0	1	2	5.93787e-06
		F069	0	0	0	0	1	1	0	0	0	0	0	0	0	0	0	2	5.93787e-06
		G310	0	0	0	0	1	0	0	0	0	0	0	0	0	1	0	2	5.93787e-06
		Y344	0	0	0	0	1	1	0	0	0	0	0	0	0	0	0	2	5.93787e-06
		X952	0	0	0	0	1	0	0	0	1	0	0	0	0	0	0	2	5.93787e-06
		C829	0	0	0	0	1	0	0	0	0	1	0	0	0	0	0	2	5.93787e-06
		I379	0	0	0	0	1	0	0	0	1	0	0	0	0	0	0	2	5.93787e-06
		V029	0	0	0	0	1	0	0	0	0	0	0	0	1	0	0	2	5.93787e-06
		C784	0	0	0	0	1	0	0	1	0	0	0	0	0	0	0	2	5.93787e-06
		P220	0	0	0	0	0	1	0	0	0	0	0	1	0	0	0	2	5.93787e-06
		E348	0	0	0	0	0	1	1	0	0	0	0	0	0	0	0	2	5.93787e-06
		C411	0	0	0	0	0	1	0	0	1	0	0	0	0	0	0	2	5.93787e-06
		V199	0	0	0	0	0	1	0	0	1	0	0	0	0	0	0	2	5.93787e-06
		I822	0	0	0	0	0	1	0	0	1	0	0	0	0	0	0	2	5.93787e-06
		W697	0	0	0	0	0	1	0	0	1	0	0	0	0	0	0	2	5.93787e-06
		A060	0	0	0	0	0	0	0	0	0	1	0	0	0	1	0	2	5.93787e-06
		V099	0	0	0	0	0	0	0	1	1	0	0	0	0	0	0	2	5.93787e-06
		Q200	0	0	0	0	0	1	0	0	0	0	0	0	0	1	0	2	5.93787e-06
		K252	0	0	0	0	0	1	0	0	0	0	0	0	0	0	1	2	5.93787e-06
		K811	0	0	0	0	0	0	0	0	1	0	0	0	1	0	0	2	5.93787e-06
		C343	0	0	0	0	0	1	1	0	0	0	0	0	0	0	0	2	5.93787e-06
		D752	0	0	0	0	0	1	0	0	0	0	1	0	0	0	0	2	5.93787e-06
		D485	0	0	0	0	0	1	1	0	0	0	0	0	0	0	0	2	5.93787e-06
		C783	0	0	0	0	0	1	0	0	0	0	0	1	0	0	0	2	5.93787e-06
		J411	0	0	0	0	0	1	0	0	0	0	0	1	0	0	0	2	5.93787e-06
		X330	0	0	0	0	0	1	1	0	0	0	0	0	0	0	0	2	5.93787e-06
		M103	0	0	0	0	0	1	0	0	0	0	1	0	0	0	0	2	5.93787e-06
		M509	0	0	0	0	0	1	1	0	0	0	0	0	0	0	0	2	5.93787e-06
		E040	0	0	0	0	0	1	0	0	0	0	0	1	0	0	0	2	5.93787e-06
		L039	0	0	0	0	0	1	0	0	0	0	0	0	0	0	1	2	5.93787e-06
		K869	0	0	0	0	0	1	1	0	0	0	0	0	0	0	0	2	5.93787e-06
		V274	0	0	0	0	0	1	0	0	0	0	0	0	1	0	0	2	5.93787e-06
		K401	0	0	0	0	0	1	0	0	0	0	0	0	1	0	0	2	5.93787e-06
		J698	0	0	0	0	0	0	2	0	0	0	0	0	0	0	0	2	5.93787e-06
		C768	0	0	0	0	0	0	1	0	0	0	1	0	0	0	0	2	5.93787e-06
		W109	0	0	0	0	0	0	1	0	0	0	0	1	0	0	0	2	5.93787e-06
		W148	0	0	0	0	0	0	1	0	1	0	0	0	0	0	0	2	5.93787e-06
		N009	0	0	0	0	0	0	1	0	0	0	0	0	0	1	0	2	5.93787e-06
		Y120	0	0	0	0	0	0	1	0	0	0	0	1	0	0	0	2	5.93787e-06
		D371	0	0	0	0	0	0	1	0	0	0	1	0	0	0	0	2	5.93787e-06
		G451	0	0	0	0	0	0	1	0	0	0	1	0	0	0	0	2	5.93787e-06
		I608	0	0	0	0	0	0	1	0	0	0	1	0	0	0	0	2	5.93787e-06
		A304	0	0	0	0	0	0	1	0	0	0	0	0	0	0	1	2	5.93787e-06
		D239	0	0	0	0	0	0	1	1	0	0	0	0	0	0	0	2	5.93787e-06
		W747	0	0	0	0	0	0	1	0	0	0	0	1	0	0	0	2	5.93787e-06
		K281	0	0	0	0	0	0	1	1	0	0	0	0	0	0	0	2	5.93787e-06
		E661	0	0	0	0	0	0	0	0	0	0	0	0	1	0	1	2	5.93787e-06
		M899	0	0	0	0	0	0	1	1	0	0	0	0	0	0	0	2	5.93787e-06
		I311	0	0	0	0	0	0	1	1	0	0	0	0	0	0	0	2	5.93787e-06
		C670	0	0	0	0	0	0	0	1	0	1	0	0	0	0	0	2	5.93787e-06
		C435	0	0	0	0	0	0	1	0	0	0	0	0	0	0	1	2	5.93787e-06
		E211	0	0	0	0	0	0	1	0	0	1	0	0	0	0	0	2	5.93787e-06
		J853	0	0	0	0	0	0	0	0	0	0	0	1	0	1	0	2	5.93787e-06
		F321	0	0	0	0	0	0	0	0	0	0	0	1	0	1	0	2	5.93787e-06
		E749	0	0	0	0	0	0	0	1	0	0	0	0	1	0	0	2	5.93787e-06
		X934	0	0	0	0	0	0	0	1	0	0	0	1	0	0	0	2	5.93787e-06
		M622	0	0	0	0	0	0	0	1	0	0	0	0	0	0	1	2	5.93787e-06
		K520	0	0	0	0	0	0	0	1	0	0	0	0	0	0	1	2	5.93787e-06
		Y340	0	0	0	0	0	0	0	0	0	1	0	0	0	1	0	2	5.93787e-06
		K591	0	0	0	0	0	0	0	1	0	0	1	0	0	0	0	2	5.93787e-06
		C150	0	0	0	0	0	0	0	1	0	1	0	0	0	0	0	2	5.93787e-06
		Q878	0	0	0	0	0	0	0	1	0	0	0	1	0	0	0	2	5.93787e-06
		X099	0	0	0	0	0	0	0	1	0	0	0	0	0	1	0	2	5.93787e-06
		K603	0	0	0	0	0	0	0	1	0	0	0	0	0	0	1	2	5.93787e-06
		X202	0	0	0	0	0	0	0	1	0	0	1	0	0	0	0	2	5.93787e-06
		X650	0	0	0	0	0	0	0	1	0	0	0	1	0	0	0	2	5.93787e-06
		F148	0	0	0	0	0	0	0	1	0	0	0	1	0	0	0	2	5.93787e-06
		W866	0	0	0	0	0	0	0	1	1	0	0	0	0	0	0	2	5.93787e-06
		X232	0	0	0	0	0	0	0	1	0	1	0	0	0	0	0	2	5.93787e-06
		I721	0	0	0	0	0	0	0	1	0	0	0	1	0	0	0	2	5.93787e-06
		G210	0	0	0	0	0	0	0	0	1	0	1	0	0	0	0	2	5.93787e-06
		K761	0	0	0	0	0	0	0	0	0	0	1	0	0	0	1	2	5.93787e-06
		K623	0	0	0	0	0	0	0	0	1	1	0	0	0	0	0	2	5.93787e-06
		L021	0	0	0	0	0	0	0	0	1	0	0	0	0	1	0	2	5.93787e-06
		W864	0	0	0	0	0	0	0	0	1	0	0	0	1	0	0	2	5.93787e-06
		V244	0	0	0	0	0	0	0	0	1	0	0	0	0	1	0	2	5.93787e-06
		C254	0	0	0	0	0	0	0	0	1	0	0	0	0	1	0	2	5.93787e-06
		W069	0	0	0	0	0	0	0	0	0	0	0	0	2	0	0	2	5.93787e-06
		K400	0	0	0	0	0	0	0	0	1	0	0	0	0	1	0	2	5.93787e-06
		J851	0	0	0	0	0	0	0	0	1	0	1	0	0	0	0	2	5.93787e-06
		V102	0	0	0	0	0	0	0	0	1	1	0	0	0	0	0	2	5.93787e-06
		N151	0	0	0	0	0	0	0	0	1	0	0	0	0	1	0	2	5.93787e-06
		Y210	0	0	0	0	0	0	0	0	1	0	0	0	0	0	1	2	5.93787e-06
		B028	0	0	0	0	0	0	0	0	1	0	0	0	0	1	0	2	5.93787e-06
		M303	0	0	0	0	0	0	0	0	1	0	0	0	0	0	1	2	5.93787e-06
		C321	0	0	0	0	0	0	0	0	1	0	0	0	0	1	0	2	5.93787e-06
		C241	0	0	0	0	0	0	0	0	1	0	0	0	1	0	0	2	5.93787e-06
		Q242	0	0	0	0	0	0	0	0	0	2	0	0	0	0	0	2	5.93787e-06
		I611	0	0	0	0	0	0	0	0	0	2	0	0	0	0	0	2	5.93787e-06
		I061	0	0	0	0	0	0	0	0	0	1	1	0	0	0	0	2	5.93787e-06
		M518	0	0	0	0	0	0	0	0	0	1	0	0	1	0	0	2	5.93787e-06
		X958	0	0	0	0	0	0	0	0	0	1	1	0	0	0	0	2	5.93787e-06
		X338	0	0	0	0	0	0	0	0	0	1	0	0	1	0	0	2	5.93787e-06
		G800	0	0	0	0	0	0	0	0	0	1	0	0	0	0	1	2	5.93787e-06
		J678	0	0	0	0	0	0	0	0	0	1	0	1	0	0	0	2	5.93787e-06
		N140	0	0	0	0	0	0	0	0	0	1	0	0	0	1	0	2	5.93787e-06
		Q240	0	0	0	0	0	0	0	0	0	1	0	0	1	0	0	2	5.93787e-06
		I770	0	0	0	0	0	0	0	0	0	0	0	0	1	1	0	2	5.93787e-06
		L029	0	0	0	0	0	0	0	0	0	1	1	0	0	0	0	2	5.93787e-06
		W780	0	0	0	0	0	0	0	0	0	0	0	1	0	0	1	2	5.93787e-06
		N251	0	0	0	0	0	0	0	0	0	1	1	0	0	0	0	2	5.93787e-06
		I604	0	0	0	0	0	0	0	0	0	0	2	0	0	0	0	2	5.93787e-06
		F159	0	0	0	0	0	0	0	0	0	0	2	0	0	0	0	2	5.93787e-06
		J108	0	0	0	0	0	0	0	0	0	0	2	0	0	0	0	2	5.93787e-06
		C257	0	0	0	0	0	0	0	0	0	0	0	1	0	1	0	2	5.93787e-06
		C227	0	0	0	0	0	0	0	0	0	0	1	0	0	1	0	2	5.93787e-06
		Y128	0	0	0	0	0	0	0	0	0	0	1	1	0	0	0	2	5.93787e-06
		C211	0	0	0	0	0	0	0	0	0	0	1	0	1	0	0	2	5.93787e-06
		E849	0	0	0	0	0	0	0	0	0	0	1	1	0	0	0	2	5.93787e-06
		C399	0	0	0	0	0	0	0	0	0	0	1	0	0	1	0	2	5.93787e-06
		W014	0	0	0	0	0	0	0	0	0	0	1	1	0	0	0	2	5.93787e-06
		W867	0	0	0	0	0	0	0	0	0	0	1	0	0	0	1	2	5.93787e-06
		D698	0	0	0	0	0	0	0	0	0	0	1	0	0	0	1	2	5.93787e-06
		A403	0	0	0	0	0	0	0	0	0	0	0	0	1	1	0	2	5.93787e-06
		G219	0	0	0	0	0	0	0	0	0	0	0	1	0	1	0	2	5.93787e-06
		D593	0	0	0	0	0	0	0	0	0	0	0	1	0	0	1	2	5.93787e-06
		C163	0	0	0	0	0	0	0	0	0	0	0	1	1	0	0	2	5.93787e-06
		C33	0	0	0	0	0	0	0	0	0	0	0	1	0	1	0	2	5.93787e-06
		N110	0	0	0	0	0	0	0	0	0	0	0	1	1	0	0	2	5.93787e-06
		W860	0	0	0	0	0	0	0	0	0	0	0	1	0	0	1	2	5.93787e-06
		V445	0	0	0	0	0	0	0	0	0	0	0	0	1	1	0	2	5.93787e-06
		X425	0	0	0	0	0	0	0	0	0	0	0	0	1	0	1	2	5.93787e-06
		N141	0	0	0	0	0	0	0	0	0	0	0	0	1	1	0	2	5.93787e-06
		I511	0	0	0	0	0	0	0	0	0	0	0	0	1	0	1	2	5.93787e-06
		F141	0	0	0	0	0	0	0	0	0	0	0	0	1	1	0	2	5.93787e-06
		F059	0	0	0	0	0	0	0	0	0	0	0	0	1	0	1	2	5.93787e-06
		M471	0	0	0	0	0	0	0	0	0	0	0	0	1	1	0	2	5.93787e-06
		C759	0	0	0	0	0	0	0	0	0	0	0	0	1	0	1	2	5.93787e-06
		W876	0	0	0	0	0	0	0	0	0	0	0	0	0	0	2	2	5.93787e-06
		Y300	1	0	0	0	0	0	0	0	0	0	0	0	0	0	0	1	2.96894e-06
		D473	1	0	0	0	0	0	0	0	0	0	0	0	0	0	0	1	2.96894e-06
		W340	1	0	0	0	0	0	0	0	0	0	0	0	0	0	0	1	2.96894e-06
		F988	1	0	0	0	0	0	0	0	0	0	0	0	0	0	0	1	2.96894e-06
		C728	1	0	0	0	0	0	0	0	0	0	0	0	0	0	0	1	2.96894e-06
		M889	1	0	0	0	0	0	0	0	0	0	0	0	0	0	0	1	2.96894e-06
		W738	1	0	0	0	0	0	0	0	0	0	0	0	0	0	0	1	2.96894e-06
		I372	1	0	0	0	0	0	0	0	0	0	0	0	0	0	0	1	2.96894e-06
		C675	1	0	0	0	0	0	0	0	0	0	0	0	0	0	0	1	2.96894e-06
		P292	1	0	0	0	0	0	0	0	0	0	0	0	0	0	0	1	2.96894e-06
		A86	1	0	0	0	0	0	0	0	0	0	0	0	0	0	0	1	2.96894e-06
		J981	1	0	0	0	0	0	0	0	0	0	0	0	0	0	0	1	2.96894e-06
		K311	1	0	0	0	0	0	0	0	0	0	0	0	0	0	0	1	2.96894e-06
		I613	1	0	0	0	0	0	0	0	0	0	0	0	0	0	0	1	2.96894e-06
		J430	1	0	0	0	0	0	0	0	0	0	0	0	0	0	0	1	2.96894e-06
		V446	1	0	0	0	0	0	0	0	0	0	0	0	0	0	0	1	2.96894e-06
		W126	1	0	0	0	0	0	0	0	0	0	0	0	0	0	0	1	2.96894e-06
		G721	1	0	0	0	0	0	0	0	0	0	0	0	0	0	0	1	2.96894e-06
		Y218	1	0	0	0	0	0	0	0	0	0	0	0	0	0	0	1	2.96894e-06
		W309	1	0	0	0	0	0	0	0	0	0	0	0	0	0	0	1	2.96894e-06
		G231	1	0	0	0	0	0	0	0	0	0	0	0	0	0	0	1	2.96894e-06
		X120	1	0	0	0	0	0	0	0	0	0	0	0	0	0	0	1	2.96894e-06
		K262	1	0	0	0	0	0	0	0	0	0	0	0	0	0	0	1	2.96894e-06
		I891	1	0	0	0	0	0	0	0	0	0	0	0	0	0	0	1	2.96894e-06
		W949	1	0	0	0	0	0	0	0	0	0	0	0	0	0	0	1	2.96894e-06
		Q205	1	0	0	0	0	0	0	0	0	0	0	0	0	0	0	1	2.96894e-06
		F170	1	0	0	0	0	0	0	0	0	0	0	0	0	0	0	1	2.96894e-06
		K450	1	0	0	0	0	0	0	0	0	0	0	0	0	0	0	1	2.96894e-06
		A161	1	0	0	0	0	0	0	0	0	0	0	0	0	0	0	1	2.96894e-06
		B679	1	0	0	0	0	0	0	0	0	0	0	0	0	0	0	1	2.96894e-06
		K510	1	0	0	0	0	0	0	0	0	0	0	0	0	0	0	1	2.96894e-06
		E708	1	0	0	0	0	0	0	0	0	0	0	0	0	0	0	1	2.96894e-06
		Y841	1	0	0	0	0	0	0	0	0	0	0	0	0	0	0	1	2.96894e-06
		V251	1	0	0	0	0	0	0	0	0	0	0	0	0	0	0	1	2.96894e-06
		V890	1	0	0	0	0	0	0	0	0	0	0	0	0	0	0	1	2.96894e-06
		J949	1	0	0	0	0	0	0	0	0	0	0	0	0	0	0	1	2.96894e-06
		Q255	1	0	0	0	0	0	0	0	0	0	0	0	0	0	0	1	2.96894e-06
		C089	1	0	0	0	0	0	0	0	0	0	0	0	0	0	0	1	2.96894e-06
		I461	1	0	0	0	0	0	0	0	0	0	0	0	0	0	0	1	2.96894e-06
		D470	1	0	0	0	0	0	0	0	0	0	0	0	0	0	0	1	2.96894e-06
		V911	1	0	0	0	0	0	0	0	0	0	0	0	0	0	0	1	2.96894e-06
		Q340	1	0	0	0	0	0	0	0	0	0	0	0	0	0	0	1	2.96894e-06
		K551	0	0	0	0	0	0	0	0	0	0	0	1	0	0	0	1	2.96894e-06
		J069	0	0	1	0	0	0	0	0	0	0	0	0	0	0	0	1	2.96894e-06
		D329	0	0	0	0	0	0	0	0	0	0	0	0	0	1	0	1	2.96894e-06
		K421	0	0	0	1	0	0	0	0	0	0	0	0	0	0	0	1	2.96894e-06
		D410	0	0	0	0	0	0	0	0	1	0	0	0	0	0	0	1	2.96894e-06
		G911	0	0	0	0	0	0	0	0	0	0	0	0	0	1	0	1	2.96894e-06
		F339	0	0	0	0	0	0	0	0	0	0	1	0	0	0	0	1	2.96894e-06
		C384	0	0	0	0	0	0	0	1	0	0	0	0	0	0	0	1	2.96894e-06
		A085	0	0	0	0	0	1	0	0	0	0	0	0	0	0	0	1	2.96894e-06
		E671	0	0	0	0	0	0	1	0	0	0	0	0	0	0	0	1	2.96894e-06
		C490	0	0	0	0	0	0	1	0	0	0	0	0	0	0	0	1	2.96894e-06
		M053	0	0	0	0	0	0	0	1	0	0	0	0	0	0	0	1	2.96894e-06
		J982	0	0	0	0	0	0	1	0	0	0	0	0	0	0	0	1	2.96894e-06
		I831	0	0	0	0	0	0	0	0	0	0	1	0	0	0	0	1	2.96894e-06
		C786	0	0	0	0	0	0	0	0	0	0	0	0	0	0	1	1	2.96894e-06
		B54	0	1	0	0	0	0	0	0	0	0	0	0	0	0	0	1	2.96894e-06
		Y818	0	1	0	0	0	0	0	0	0	0	0	0	0	0	0	1	2.96894e-06
		W544	0	1	0	0	0	0	0	0	0	0	0	0	0	0	0	1	2.96894e-06
		K622	0	1	0	0	0	0	0	0	0	0	0	0	0	0	0	1	2.96894e-06
		K752	0	1	0	0	0	0	0	0	0	0	0	0	0	0	0	1	2.96894e-06
		K513	0	1	0	0	0	0	0	0	0	0	0	0	0	0	0	1	2.96894e-06
		B019	0	1	0	0	0	0	0	0	0	0	0	0	0	0	0	1	2.96894e-06
		G407	0	1	0	0	0	0	0	0	0	0	0	0	0	0	0	1	2.96894e-06
		C186	0	0	0	0	0	0	0	0	0	0	0	0	0	0	1	1	2.96894e-06
		K461	0	0	0	1	0	0	0	0	0	0	0	0	0	0	0	1	2.96894e-06
		X229	0	1	0	0	0	0	0	0	0	0	0	0	0	0	0	1	2.96894e-06
		D440	0	1	0	0	0	0	0	0	0	0	0	0	0	0	0	1	2.96894e-06
		J61	0	1	0	0	0	0	0	0	0	0	0	0	0	0	0	1	2.96894e-06
		W700	0	1	0	0	0	0	0	0	0	0	0	0	0	0	0	1	2.96894e-06
		C711	0	0	0	0	0	0	1	0	0	0	0	0	0	0	0	1	2.96894e-06
		F251	0	1	0	0	0	0	0	0	0	0	0	0	0	0	0	1	2.96894e-06
		I670	0	1	0	0	0	0	0	0	0	0	0	0	0	0	0	1	2.96894e-06
		W110	0	1	0	0	0	0	0	0	0	0	0	0	0	0	0	1	2.96894e-06
		W682	0	1	0	0	0	0	0	0	0	0	0	0	0	0	0	1	2.96894e-06
		V689	0	1	0	0	0	0	0	0	0	0	0	0	0	0	0	1	2.96894e-06
		K904	0	1	0	0	0	0	0	0	0	0	0	0	0	0	0	1	2.96894e-06
		D223	0	1	0	0	0	0	0	0	0	0	0	0	0	0	0	1	2.96894e-06
		C155	0	0	0	0	0	1	0	0	0	0	0	0	0	0	0	1	2.96894e-06
		I745	0	1	0	0	0	0	0	0	0	0	0	0	0	0	0	1	2.96894e-06
		F220	0	1	0	0	0	0	0	0	0	0	0	0	0	0	0	1	2.96894e-06
		V049	0	1	0	0	0	0	0	0	0	0	0	0	0	0	0	1	2.96894e-06
		G255	0	1	0	0	0	0	0	0	0	0	0	0	0	0	0	1	2.96894e-06
		E739	0	1	0	0	0	0	0	0	0	0	0	0	0	0	0	1	2.96894e-06
		B189	0	0	0	0	0	0	0	0	0	0	0	0	1	0	0	1	2.96894e-06
		G932	0	0	0	0	0	0	0	0	1	0	0	0	0	0	0	1	2.96894e-06
		W070	0	1	0	0	0	0	0	0	0	0	0	0	0	0	0	1	2.96894e-06
		J81	0	0	0	0	0	0	0	1	0	0	0	0	0	0	0	1	2.96894e-06
		W559	0	1	0	0	0	0	0	0	0	0	0	0	0	0	0	1	2.96894e-06
		G913	0	1	0	0	0	0	0	0	0	0	0	0	0	0	0	1	2.96894e-06
		B085	0	1	0	0	0	0	0	0	0	0	0	0	0	0	0	1	2.96894e-06
		R571	0	1	0	0	0	0	0	0	0	0	0	0	0	0	0	1	2.96894e-06
		C889	0	1	0	0	0	0	0	0	0	0	0	0	0	0	0	1	2.96894e-06
		K272	0	1	0	0	0	0	0	0	0	0	0	0	0	0	0	1	2.96894e-06
		Y269	0	1	0	0	0	0	0	0	0	0	0	0	0	0	0	1	2.96894e-06
		E750	0	1	0	0	0	0	0	0	0	0	0	0	0	0	0	1	2.96894e-06
		D640	0	1	0	0	0	0	0	0	0	0	0	0	0	0	0	1	2.96894e-06
		E121	0	0	1	0	0	0	0	0	0	0	0	0	0	0	0	1	2.96894e-06
		Y150	0	0	1	0	0	0	0	0	0	0	0	0	0	0	0	1	2.96894e-06
		M359	0	0	1	0	0	0	0	0	0	0	0	0	0	0	0	1	2.96894e-06
		M818	0	0	1	0	0	0	0	0	0	0	0	0	0	0	0	1	2.96894e-06
		N482	0	0	1	0	0	0	0	0	0	0	0	0	0	0	0	1	2.96894e-06
		K604	0	0	1	0	0	0	0	0	0	0	0	0	0	0	0	1	2.96894e-06
		W059	0	0	1	0	0	0	0	0	0	0	0	0	0	0	0	1	2.96894e-06
		K263	0	0	1	0	0	0	0	0	0	0	0	0	0	0	0	1	2.96894e-06
		Q338	0	0	1	0	0	0	0	0	0	0	0	0	0	0	0	1	2.96894e-06
		I870	0	0	1	0	0	0	0	0	0	0	0	0	0	0	0	1	2.96894e-06
		K629	0	0	1	0	0	0	0	0	0	0	0	0	0	0	0	1	2.96894e-06
		M803	0	0	1	0	0	0	0	0	0	0	0	0	0	0	0	1	2.96894e-06
		W775	0	0	1	0	0	0	0	0	0	0	0	0	0	0	0	1	2.96894e-06
		D693	0	0	1	0	0	0	0	0	0	0	0	0	0	0	0	1	2.96894e-06
		D480	0	0	1	0	0	0	0	0	0	0	0	0	0	0	0	1	2.96894e-06
		A520	0	0	1	0	0	0	0	0	0	0	0	0	0	0	0	1	2.96894e-06
		D372	0	0	1	0	0	0	0	0	0	0	0	0	0	0	0	1	2.96894e-06
		N050	0	0	1	0	0	0	0	0	0	0	0	0	0	0	0	1	2.96894e-06
		B770	0	0	1	0	0	0	0	0	0	0	0	0	0	0	0	1	2.96894e-06
		E839	0	0	1	0	0	0	0	0	0	0	0	0	0	0	0	1	2.96894e-06
		A081	0	0	1	0	0	0	0	0	0	0	0	0	0	0	0	1	2.96894e-06
		M939	0	0	1	0	0	0	0	0	0	0	0	0	0	0	0	1	2.96894e-06
		W319	0	0	1	0	0	0	0	0	0	0	0	0	0	0	0	1	2.96894e-06
		A301	0	0	1	0	0	0	0	0	0	0	0	0	0	0	0	1	2.96894e-06
		Y312	0	0	1	0	0	0	0	0	0	0	0	0	0	0	0	1	2.96894e-06
		W844	0	0	1	0	0	0	0	0	0	0	0	0	0	0	0	1	2.96894e-06
		Y032	0	0	1	0	0	0	0	0	0	0	0	0	0	0	0	1	2.96894e-06
		K289	0	0	1	0	0	0	0	0	0	0	0	0	0	0	0	1	2.96894e-06
		J679	0	0	1	0	0	0	0	0	0	0	0	0	0	0	0	1	2.96894e-06
		Y044	0	0	1	0	0	0	0	0	0	0	0	0	0	0	0	1	2.96894e-06
		C068	0	0	1	0	0	0	0	0	0	0	0	0	0	0	0	1	2.96894e-06
		M332	0	0	1	0	0	0	0	0	0	0	0	0	0	0	0	1	2.96894e-06
		V196	0	0	1	0	0	0	0	0	0	0	0	0	0	0	0	1	2.96894e-06
		E209	0	0	1	0	0	0	0	0	0	0	0	0	0	0	0	1	2.96894e-06
		A170	0	0	0	0	0	0	0	0	0	0	0	1	0	0	0	1	2.96894e-06
		C318	0	0	0	0	0	0	1	0	0	0	0	0	0	0	0	1	2.96894e-06
		L932	0	0	0	0	0	0	0	0	0	0	0	1	0	0	0	1	2.96894e-06
		C409	0	0	0	1	0	0	0	0	0	0	0	0	0	0	0	1	2.96894e-06
		R95	0	0	0	0	0	1	0	0	0	0	0	0	0	0	0	1	2.96894e-06
		X020	0	0	0	0	0	0	1	0	0	0	0	0	0	0	0	1	2.96894e-06
		E051	0	0	0	0	0	0	0	0	1	0	0	0	0	0	0	1	2.96894e-06
		M314	0	0	0	0	0	0	0	0	0	0	0	0	0	0	1	1	2.96894e-06
		Y830	0	0	0	0	0	1	0	0	0	0	0	0	0	0	0	1	2.96894e-06
		N329	0	0	0	0	0	0	0	0	0	0	0	0	0	1	0	1	2.96894e-06
		Q204	0	0	0	0	0	0	0	0	0	0	0	1	0	0	0	1	2.96894e-06
		A084	0	0	0	0	0	0	0	0	0	0	0	0	1	0	0	1	2.96894e-06
		N281	0	0	0	0	0	0	0	0	0	0	1	0	0	0	0	1	2.96894e-06
		I132	0	0	0	0	1	0	0	0	0	0	0	0	0	0	0	1	2.96894e-06
		R688	0	0	0	1	0	0	0	0	0	0	0	0	0	0	0	1	2.96894e-06
		K228	0	0	0	1	0	0	0	0	0	0	0	0	0	0	0	1	2.96894e-06
		K715	0	0	0	1	0	0	0	0	0	0	0	0	0	0	0	1	2.96894e-06
		D414	0	0	0	1	0	0	0	0	0	0	0	0	0	0	0	1	2.96894e-06
		W236	0	0	0	1	0	0	0	0	0	0	0	0	0	0	0	1	2.96894e-06
		B509	0	0	0	1	0	0	0	0	0	0	0	0	0	0	0	1	2.96894e-06
		Q289	0	0	0	1	0	0	0	0	0	0	0	0	0	0	0	1	2.96894e-06
		B160	0	0	0	1	0	0	0	0	0	0	0	0	0	0	0	1	2.96894e-06
		P291	0	0	0	1	0	0	0	0	0	0	0	0	0	0	0	1	2.96894e-06
		M339	0	0	0	1	0	0	0	0	0	0	0	0	0	0	0	1	2.96894e-06
		I708	0	0	0	1	0	0	0	0	0	0	0	0	0	0	0	1	2.96894e-06
		W845	0	0	0	1	0	0	0	0	0	0	0	0	0	0	0	1	2.96894e-06
		C927	0	0	0	1	0	0	0	0	0	0	0	0	0	0	0	1	2.96894e-06
		D330	0	0	0	1	0	0	0	0	0	0	0	0	0	0	0	1	2.96894e-06
		G373	0	0	0	1	0	0	0	0	0	0	0	0	0	0	0	1	2.96894e-06
		X339	0	0	0	1	0	0	0	0	0	0	0	0	0	0	0	1	2.96894e-06
		B211	0	0	0	1	0	0	0	0	0	0	0	0	0	0	0	1	2.96894e-06
		Q054	0	0	0	1	0	0	0	0	0	0	0	0	0	0	0	1	2.96894e-06
		C492	0	0	0	1	0	0	0	0	0	0	0	0	0	0	0	1	2.96894e-06
		B59	0	0	0	1	0	0	0	0	0	0	0	0	0	0	0	1	2.96894e-06
		E740	0	0	0	1	0	0	0	0	0	0	0	0	0	0	0	1	2.96894e-06
		Q759	0	0	0	1	0	0	0	0	0	0	0	0	0	0	0	1	2.96894e-06
		N359	0	0	0	1	0	0	0	0	0	0	0	0	0	0	0	1	2.96894e-06
		C700	0	0	0	1	0	0	0	0	0	0	0	0	0	0	0	1	2.96894e-06
		C403	0	0	0	1	0	0	0	0	0	0	0	0	0	0	0	1	2.96894e-06
		G619	0	0	0	1	0	0	0	0	0	0	0	0	0	0	0	1	2.96894e-06
		C261	0	0	0	1	0	0	0	0	0	0	0	0	0	0	0	1	2.96894e-06
		B500	0	0	0	1	0	0	0	0	0	0	0	0	0	0	0	1	2.96894e-06
		X000	0	0	0	1	0	0	0	0	0	0	0	0	0	0	0	1	2.96894e-06
		W851	0	0	0	1	0	0	0	0	0	0	0	0	0	0	0	1	2.96894e-06
		B552	0	0	0	1	0	0	0	0	0	0	0	0	0	0	0	1	2.96894e-06
		F443	0	0	0	1	0	0	0	0	0	0	0	0	0	0	0	1	2.96894e-06
		Q231	0	0	0	1	0	0	0	0	0	0	0	0	0	0	0	1	2.96894e-06
		E160	0	0	0	1	0	0	0	0	0	0	0	0	0	0	0	1	2.96894e-06
		M418	0	0	0	1	0	0	0	0	0	0	0	0	0	0	0	1	2.96894e-06
		G249	0	0	0	1	0	0	0	0	0	0	0	0	0	0	0	1	2.96894e-06
		W839	0	0	0	1	0	0	0	0	0	0	0	0	0	0	0	1	2.96894e-06
		M310	0	0	0	0	0	0	0	0	0	0	0	0	0	0	1	1	2.96894e-06
		A179	0	0	0	0	0	0	0	0	0	0	1	0	0	0	0	1	2.96894e-06
		D891	0	0	0	0	0	0	0	1	0	0	0	0	0	0	0	1	2.96894e-06
		C778	0	0	0	0	0	0	0	1	0	0	0	0	0	0	0	1	2.96894e-06
		I601	0	0	0	0	0	0	0	0	0	0	1	0	0	0	0	1	2.96894e-06
		C162	0	0	0	0	0	0	0	0	0	1	0	0	0	0	0	1	2.96894e-06
		B232	0	0	0	0	0	0	0	0	0	0	0	0	0	0	1	1	2.96894e-06
		G98	0	0	0	0	0	0	0	0	0	0	0	0	1	0	0	1	2.96894e-06
		W850	0	0	0	0	0	0	0	0	0	0	0	0	0	0	1	1	2.96894e-06
		G118	0	0	0	0	0	0	0	0	0	0	0	1	0	0	0	1	2.96894e-06
		D449	0	0	0	0	1	0	0	0	0	0	0	0	0	0	0	1	2.96894e-06
		Y119	0	0	0	0	0	0	1	0	0	0	0	0	0	0	0	1	2.96894e-06
		C251	0	0	0	0	1	0	0	0	0	0	0	0	0	0	0	1	2.96894e-06
		W648	0	0	0	0	1	0	0	0	0	0	0	0	0	0	0	1	2.96894e-06
		V235	0	0	0	0	1	0	0	0	0	0	0	0	0	0	0	1	2.96894e-06
		E248	0	0	0	0	1	0	0	0	0	0	0	0	0	0	0	1	2.96894e-06
		L022	0	0	0	0	1	0	0	0	0	0	0	0	0	0	0	1	2.96894e-06
		X474	0	0	0	0	1	0	0	0	0	0	0	0	0	0	0	1	2.96894e-06
		X208	0	0	0	0	1	0	0	0	0	0	0	0	0	0	0	1	2.96894e-06
		Q224	0	0	0	0	0	0	0	0	0	1	0	0	0	0	0	1	2.96894e-06
		F163	0	0	0	0	1	0	0	0	0	0	0	0	0	0	0	1	2.96894e-06
		A260	0	0	0	0	0	0	0	0	0	0	0	0	1	0	0	1	2.96894e-06
		N134	0	0	0	0	1	0	0	0	0	0	0	0	0	0	0	1	2.96894e-06
		C931	0	0	0	0	0	0	0	0	0	0	0	1	0	0	0	1	2.96894e-06
		I512	0	0	0	0	0	0	0	0	1	0	0	0	0	0	0	1	2.96894e-06
		X970	0	0	0	0	1	0	0	0	0	0	0	0	0	0	0	1	2.96894e-06
		N422	0	0	0	0	1	0	0	0	0	0	0	0	0	0	0	1	2.96894e-06
		I490	0	0	0	0	1	0	0	0	0	0	0	0	0	0	0	1	2.96894e-06
		E033	0	0	0	0	1	0	0	0	0	0	0	0	0	0	0	1	2.96894e-06
		V239	0	0	0	0	1	0	0	0	0	0	0	0	0	0	0	1	2.96894e-06
		D600	0	0	0	0	0	0	0	0	0	0	1	0	0	0	0	1	2.96894e-06
		V265	0	0	0	0	1	0	0	0	0	0	0	0	0	0	0	1	2.96894e-06
		Q640	0	0	0	0	1	0	0	0	0	0	0	0	0	0	0	1	2.96894e-06
		Q874	0	0	0	0	0	0	0	0	0	0	0	0	0	1	0	1	2.96894e-06
		Y288	0	0	0	0	1	0	0	0	0	0	0	0	0	0	0	1	2.96894e-06
		I890	0	0	0	0	0	0	0	0	0	0	0	0	1	0	0	1	2.96894e-06
		Q225	0	0	0	0	0	0	0	0	0	0	0	0	0	1	0	1	2.96894e-06
		X500	0	0	0	0	1	0	0	0	0	0	0	0	0	0	0	1	2.96894e-06
		Q349	0	0	0	0	1	0	0	0	0	0	0	0	0	0	0	1	2.96894e-06
		X419	0	0	0	0	1	0	0	0	0	0	0	0	0	0	0	1	2.96894e-06
		F169	0	0	0	0	1	0	0	0	0	0	0	0	0	0	0	1	2.96894e-06
		I801	0	0	0	0	1	0	0	0	0	0	0	0	0	0	0	1	2.96894e-06
		F710	0	0	0	0	1	0	0	0	0	0	0	0	0	0	0	1	2.96894e-06
		G318	0	0	0	0	0	0	0	1	0	0	0	0	0	0	0	1	2.96894e-06
		E055	0	0	0	0	0	0	0	1	0	0	0	0	0	0	0	1	2.96894e-06
		C400	0	0	0	0	0	0	0	0	1	0	0	0	0	0	0	1	2.96894e-06
		C183	0	0	0	0	0	0	1	0	0	0	0	0	0	0	0	1	2.96894e-06
		G969	0	0	0	0	0	0	1	0	0	0	0	0	0	0	0	1	2.96894e-06
		G009	0	0	0	0	0	0	0	0	0	0	0	1	0	0	0	1	2.96894e-06
		D014	0	0	0	0	1	0	0	0	0	0	0	0	0	0	0	1	2.96894e-06
		K500	0	0	0	0	1	0	0	0	0	0	0	0	0	0	0	1	2.96894e-06
		K742	0	0	0	0	1	0	0	0	0	0	0	0	0	0	0	1	2.96894e-06
		M068	0	0	0	0	1	0	0	0	0	0	0	0	0	0	0	1	2.96894e-06
		K658	0	0	0	0	0	0	0	1	0	0	0	0	0	0	0	1	2.96894e-06
		C447	0	0	0	0	1	0	0	0	0	0	0	0	0	0	0	1	2.96894e-06
		L059	0	0	0	0	1	0	0	0	0	0	0	0	0	0	0	1	2.96894e-06
		V124	0	0	0	0	1	0	0	0	0	0	0	0	0	0	0	1	2.96894e-06
		Y339	0	0	0	0	1	0	0	0	0	0	0	0	0	0	0	1	2.96894e-06
		A811	0	0	0	0	1	0	0	0	0	0	0	0	0	0	0	1	2.96894e-06
		J312	0	0	0	0	1	0	0	0	0	0	0	0	0	0	0	1	2.96894e-06
		A029	0	0	0	0	1	0	0	0	0	0	0	0	0	0	0	1	2.96894e-06
		K440	0	0	0	0	1	0	0	0	0	0	0	0	0	0	0	1	2.96894e-06
		J940	0	0	0	0	1	0	0	0	0	0	0	0	0	0	0	1	2.96894e-06
		C300	0	0	0	0	0	1	0	0	0	0	0	0	0	0	0	1	2.96894e-06
		P393	0	0	0	0	0	1	0	0	0	0	0	0	0	0	0	1	2.96894e-06
		N071	0	0	0	0	0	1	0	0	0	0	0	0	0	0	0	1	2.96894e-06
		K518	0	0	0	0	0	1	0	0	0	0	0	0	0	0	0	1	2.96894e-06
		D376	0	0	0	0	0	1	0	0	0	0	0	0	0	0	0	1	2.96894e-06
		L038	0	0	0	0	0	1	0	0	0	0	0	0	0	0	0	1	2.96894e-06
		L989	0	0	0	0	0	1	0	0	0	0	0	0	0	0	0	1	2.96894e-06
		F195	0	0	0	0	0	1	0	0	0	0	0	0	0	0	0	1	2.96894e-06
		G838	0	0	0	0	0	1	0	0	0	0	0	0	0	0	0	1	2.96894e-06
		M809	0	0	0	0	0	1	0	0	0	0	0	0	0	0	0	1	2.96894e-06
		B889	0	0	0	0	0	1	0	0	0	0	0	0	0	0	0	1	2.96894e-06
		Q618	0	0	0	0	0	1	0	0	0	0	0	0	0	0	0	1	2.96894e-06
		J60	0	0	0	0	0	1	0	0	0	0	0	0	0	0	0	1	2.96894e-06
		K222	0	0	0	0	0	0	0	0	0	0	0	0	1	0	0	1	2.96894e-06
		K743	0	0	0	0	0	0	0	0	0	0	1	0	0	0	0	1	2.96894e-06
		E229	0	0	0	0	0	1	0	0	0	0	0	0	0	0	0	1	2.96894e-06
		I371	0	0	0	0	0	1	0	0	0	0	0	0	0	0	0	1	2.96894e-06
		W782	0	0	0	0	0	1	0	0	0	0	0	0	0	0	0	1	2.96894e-06
		D370	0	0	0	0	0	1	0	0	0	0	0	0	0	0	0	1	2.96894e-06
		Q788	0	0	0	0	0	1	0	0	0	0	0	0	0	0	0	1	2.96894e-06
		Y872	0	0	0	0	0	1	0	0	0	0	0	0	0	0	0	1	2.96894e-06
		V575	0	0	0	0	0	1	0	0	0	0	0	0	0	0	0	1	2.96894e-06
		V436	0	0	0	0	0	1	0	0	0	0	0	0	0	0	0	1	2.96894e-06
		B205	0	0	0	0	0	1	0	0	0	0	0	0	0	0	0	1	2.96894e-06
		Y084	0	0	0	0	0	1	0	0	0	0	0	0	0	0	0	1	2.96894e-06
		E132	0	0	0	0	0	1	0	0	0	0	0	0	0	0	0	1	2.96894e-06
		J418	0	0	0	0	0	1	0	0	0	0	0	0	0	0	0	1	2.96894e-06
		L024	0	0	0	0	0	1	0	0	0	0	0	0	0	0	0	1	2.96894e-06
		F332	0	0	0	0	0	1	0	0	0	0	0	0	0	0	0	1	2.96894e-06
		B218	0	0	0	0	0	0	0	0	0	0	0	0	0	0	1	1	2.96894e-06
		J684	0	0	0	0	0	1	0	0	0	0	0	0	0	0	0	1	2.96894e-06
		E738	0	0	0	0	0	1	0	0	0	0	0	0	0	0	0	1	2.96894e-06
		C258	0	0	0	0	0	0	0	0	0	0	0	0	0	1	0	1	2.96894e-06
		F250	0	0	0	0	0	1	0	0	0	0	0	0	0	0	0	1	2.96894e-06
		C437	0	0	0	0	0	1	0	0	0	0	0	0	0	0	0	1	2.96894e-06
		Y579	0	0	0	0	0	0	0	0	0	0	0	0	0	1	0	1	2.96894e-06
		D681	0	0	0	0	0	1	0	0	0	0	0	0	0	0	0	1	2.96894e-06
		F323	0	0	0	0	0	0	0	1	0	0	0	0	0	0	0	1	2.96894e-06
		A020	0	0	0	0	0	1	0	0	0	0	0	0	0	0	0	1	2.96894e-06
		P219	0	0	0	0	0	1	0	0	0	0	0	0	0	0	0	1	2.96894e-06
		C441	0	0	0	0	0	1	0	0	0	0	0	0	0	0	0	1	2.96894e-06
		F29	0	0	0	0	0	0	1	0	0	0	0	0	0	0	0	1	2.96894e-06
		Y850	0	0	0	0	0	1	0	0	0	0	0	0	0	0	0	1	2.96894e-06
		G713	0	0	0	0	0	1	0	0	0	0	0	0	0	0	0	1	2.96894e-06
		X689	0	0	0	0	0	0	0	0	0	1	0	0	0	0	0	1	2.96894e-06
		I318	0	0	0	0	0	0	0	0	0	0	1	0	0	0	0	1	2.96894e-06
		W855	0	0	0	0	0	0	1	0	0	0	0	0	0	0	0	1	2.96894e-06
		V925	0	0	0	0	0	0	1	0	0	0	0	0	0	0	0	1	2.96894e-06
		Q875	0	0	0	0	0	0	1	0	0	0	0	0	0	0	0	1	2.96894e-06
		Q201	0	0	0	0	0	0	1	0	0	0	0	0	0	0	0	1	2.96894e-06
		X654	0	0	0	0	0	0	0	1	0	0	0	0	0	0	0	1	2.96894e-06
		E125	0	0	0	0	0	0	1	0	0	0	0	0	0	0	0	1	2.96894e-06
		Y190	0	0	0	0	0	0	1	0	0	0	0	0	0	0	0	1	2.96894e-06
		E755	0	0	0	0	0	0	1	0	0	0	0	0	0	0	0	1	2.96894e-06
		X641	0	0	0	0	0	0	1	0	0	0	0	0	0	0	0	1	2.96894e-06
		Q282	0	0	0	0	0	0	1	0	0	0	0	0	0	0	0	1	2.96894e-06
		X334	0	0	0	0	0	0	1	0	0	0	0	0	0	0	0	1	2.96894e-06
		A819	0	0	0	0	0	0	1	0	0	0	0	0	0	0	0	1	2.96894e-06
		D380	0	0	0	0	0	0	1	0	0	0	0	0	0	0	0	1	2.96894e-06
		A490	0	0	0	0	0	0	1	0	0	0	0	0	0	0	0	1	2.96894e-06
		X850	0	0	0	0	0	0	1	0	0	0	0	0	0	0	0	1	2.96894e-06
		J153	0	0	0	0	0	0	1	0	0	0	0	0	0	0	0	1	2.96894e-06
		C319	0	0	0	0	0	0	1	0	0	0	0	0	0	0	0	1	2.96894e-06
		K738	0	0	0	0	0	0	1	0	0	0	0	0	0	0	0	1	2.96894e-06
		Q278	0	0	0	0	0	0	1	0	0	0	0	0	0	0	0	1	2.96894e-06
		I068	0	0	0	0	0	0	0	0	0	0	1	0	0	0	0	1	2.96894e-06
		I471	0	0	0	0	0	0	0	0	0	0	0	0	1	0	0	1	2.96894e-06
		P269	0	0	0	0	0	0	1	0	0	0	0	0	0	0	0	1	2.96894e-06
		F179	0	0	0	0	0	0	0	0	0	1	0	0	0	0	0	1	2.96894e-06
		Y451	0	0	0	0	0	0	1	0	0	0	0	0	0	0	0	1	2.96894e-06
		C901	0	0	0	0	0	0	0	0	0	1	0	0	0	0	0	1	2.96894e-06
		X680	0	0	0	0	0	0	0	0	0	0	0	0	1	0	0	1	2.96894e-06
		Y140	0	0	0	0	0	0	1	0	0	0	0	0	0	0	0	1	2.96894e-06
		J931	0	0	0	0	0	0	1	0	0	0	0	0	0	0	0	1	2.96894e-06
		D688	0	0	0	0	0	0	0	0	0	0	0	0	1	0	0	1	2.96894e-06
		F788	0	0	0	0	0	0	1	0	0	0	0	0	0	0	0	1	2.96894e-06
		V182	0	0	0	0	0	0	1	0	0	0	0	0	0	0	0	1	2.96894e-06
		E500	0	0	0	0	0	0	1	0	0	0	0	0	0	0	0	1	2.96894e-06
		V496	0	0	0	0	0	0	1	0	0	0	0	0	0	0	0	1	2.96894e-06
		C049	0	0	0	0	0	0	0	0	0	0	0	1	0	0	0	1	2.96894e-06
		C602	0	0	0	0	0	0	1	0	0	0	0	0	0	0	0	1	2.96894e-06
		K628	0	0	0	0	0	0	1	0	0	0	0	0	0	0	0	1	2.96894e-06
		I082	0	0	0	0	0	0	1	0	0	0	0	0	0	0	0	1	2.96894e-06
		N23	0	0	0	0	0	0	1	0	0	0	0	0	0	0	0	1	2.96894e-06
		C469	0	0	0	0	0	0	1	0	0	0	0	0	0	0	0	1	2.96894e-06
		K822	0	0	0	0	0	0	0	0	0	0	1	0	0	0	0	1	2.96894e-06
		C091	0	0	0	0	0	0	1	0	0	0	0	0	0	0	0	1	2.96894e-06
		C914	0	0	0	0	0	0	1	0	0	0	0	0	0	0	0	1	2.96894e-06
		D610	0	0	0	0	0	0	1	0	0	0	0	0	0	0	0	1	2.96894e-06
		V693	0	0	0	0	0	0	1	0	0	0	0	0	0	0	0	1	2.96894e-06
		W015	0	0	0	0	0	0	0	0	0	0	0	0	0	0	1	1	2.96894e-06
		M45	0	0	0	0	0	0	1	0	0	0	0	0	0	0	0	1	2.96894e-06
		D381	0	0	0	0	0	0	0	1	0	0	0	0	0	0	0	1	2.96894e-06
		V224	0	0	0	0	0	0	0	1	0	0	0	0	0	0	0	1	2.96894e-06
		V904	0	0	0	0	0	0	0	1	0	0	0	0	0	0	0	1	2.96894e-06
		G729	0	0	0	0	0	0	0	1	0	0	0	0	0	0	0	1	2.96894e-06
		D049	0	0	0	0	0	0	0	0	0	0	0	0	0	1	0	1	2.96894e-06
		Y575	0	0	0	0	0	0	0	1	0	0	0	0	0	0	0	1	2.96894e-06
		Y330	0	0	0	0	0	0	0	0	1	0	0	0	0	0	0	1	2.96894e-06
		F410	0	0	0	0	0	0	0	1	0	0	0	0	0	0	0	1	2.96894e-06
		W169	0	0	0	0	0	0	0	1	0	0	0	0	0	0	0	1	2.96894e-06
		C438	0	0	0	0	0	0	0	0	0	0	0	1	0	0	0	1	2.96894e-06
		V902	0	0	0	0	0	0	0	1	0	0	0	0	0	0	0	1	2.96894e-06
		X848	0	0	0	0	0	0	0	1	0	0	0	0	0	0	0	1	2.96894e-06
		G903	0	0	0	0	0	0	0	0	1	0	0	0	0	0	0	1	2.96894e-06
		Y636	0	0	0	0	0	0	0	1	0	0	0	0	0	0	0	1	2.96894e-06
		D043	0	0	0	0	0	0	0	1	0	0	0	0	0	0	0	1	2.96894e-06
		E722	0	0	0	0	0	0	0	1	0	0	0	0	0	0	0	1	2.96894e-06
		Q917	0	0	0	0	0	0	0	1	0	0	0	0	0	0	0	1	2.96894e-06
		A188	0	0	0	0	0	0	0	1	0	0	0	0	0	0	0	1	2.96894e-06
		F118	0	0	0	0	0	0	0	1	0	0	0	0	0	0	0	1	2.96894e-06
		I470	0	0	0	0	0	0	0	1	0	0	0	0	0	0	0	1	2.96894e-06
		I029	0	0	0	0	0	0	0	1	0	0	0	0	0	0	0	1	2.96894e-06
		P969	0	0	0	0	0	0	0	1	0	0	0	0	0	0	0	1	2.96894e-06
		M513	0	0	0	0	0	0	0	1	0	0	0	0	0	0	0	1	2.96894e-06
		Q281	0	0	0	0	0	0	0	0	1	0	0	0	0	0	0	1	2.96894e-06
		X452	0	0	0	0	0	0	0	1	0	0	0	0	0	0	0	1	2.96894e-06
		A412	0	0	0	0	0	0	0	1	0	0	0	0	0	0	0	1	2.96894e-06
		X450	0	0	0	0	0	0	0	0	0	0	0	0	1	0	0	1	2.96894e-06
		G600	0	0	0	0	0	0	0	1	0	0	0	0	0	0	0	1	2.96894e-06
		J930	0	0	0	0	0	0	0	1	0	0	0	0	0	0	0	1	2.96894e-06
		C268	0	0	0	0	0	0	0	1	0	0	0	0	0	0	0	1	2.96894e-06
		F449	0	0	0	0	0	0	0	1	0	0	0	0	0	0	0	1	2.96894e-06
		A562	0	0	0	0	0	0	0	1	0	0	0	0	0	0	0	1	2.96894e-06
		N490	0	0	0	0	0	0	0	1	0	0	0	0	0	0	0	1	2.96894e-06
		G418	0	0	0	0	0	0	0	1	0	0	0	0	0	0	0	1	2.96894e-06
		Q872	0	0	0	0	0	0	0	1	0	0	0	0	0	0	0	1	2.96894e-06
		F115	0	0	0	0	0	0	0	1	0	0	0	0	0	0	0	1	2.96894e-06
		D510	0	0	0	0	0	0	0	1	0	0	0	0	0	0	0	1	2.96894e-06
		J385	0	0	0	0	0	0	0	1	0	0	0	0	0	0	0	1	2.96894e-06
		K627	0	0	0	0	0	0	0	1	0	0	0	0	0	0	0	1	2.96894e-06
		B332	0	0	0	0	0	0	0	1	0	0	0	0	0	0	0	1	2.96894e-06
		X799	0	0	0	0	0	0	0	1	0	0	0	0	0	0	0	1	2.96894e-06
		G300	0	0	0	0	0	0	0	0	0	0	0	0	0	1	0	1	2.96894e-06
		X097	0	0	0	0	0	0	0	1	0	0	0	0	0	0	0	1	2.96894e-06
		V295	0	0	0	0	0	0	0	0	1	0	0	0	0	0	0	1	2.96894e-06
		V189	0	0	0	0	0	0	0	0	1	0	0	0	0	0	0	1	2.96894e-06
		X279	0	0	0	0	0	0	0	0	1	0	0	0	0	0	0	1	2.96894e-06
		X479	0	0	0	0	0	0	0	0	1	0	0	0	0	0	0	1	2.96894e-06
		D159	0	0	0	0	0	0	0	0	1	0	0	0	0	0	0	1	2.96894e-06
		I871	0	0	0	0	0	0	0	0	0	0	0	1	0	0	0	1	2.96894e-06
		C401	0	0	0	0	0	0	0	0	1	0	0	0	0	0	0	1	2.96894e-06
		J391	0	0	0	0	0	0	0	0	1	0	0	0	0	0	0	1	2.96894e-06
		G808	0	0	0	0	0	0	0	0	0	1	0	0	0	0	0	1	2.96894e-06
		V849	0	0	0	0	0	0	0	0	1	0	0	0	0	0	0	1	2.96894e-06
		A89	0	0	0	0	0	0	0	0	1	0	0	0	0	0	0	1	2.96894e-06
		P290	0	0	0	0	0	0	0	0	1	0	0	0	0	0	0	1	2.96894e-06
		C222	0	0	0	0	0	0	0	0	1	0	0	0	0	0	0	1	2.96894e-06
		F252	0	0	0	0	0	0	0	0	1	0	0	0	0	0	0	1	2.96894e-06
		K521	0	0	0	0	0	0	0	0	1	0	0	0	0	0	0	1	2.96894e-06
		W297	0	0	0	0	0	0	0	0	1	0	0	0	0	0	0	1	2.96894e-06
		X508	0	0	0	0	0	0	0	0	1	0	0	0	0	0	0	1	2.96894e-06
		X250	0	0	0	0	0	0	0	0	1	0	0	0	0	0	0	1	2.96894e-06
		B409	0	0	0	0	0	0	0	0	1	0	0	0	0	0	0	1	2.96894e-06
		I010	0	0	0	0	0	0	0	0	1	0	0	0	0	0	0	1	2.96894e-06
		Y079	0	0	0	0	0	0	0	0	1	0	0	0	0	0	0	1	2.96894e-06
		E754	0	0	0	0	0	0	0	0	1	0	0	0	0	0	0	1	2.96894e-06
		N303	0	0	0	0	0	0	0	0	1	0	0	0	0	0	0	1	2.96894e-06
		C630	0	0	0	0	0	0	0	0	1	0	0	0	0	0	0	1	2.96894e-06
		I440	0	0	0	0	0	0	0	0	1	0	0	0	0	0	0	1	2.96894e-06
		Q019	0	0	0	0	0	0	0	0	1	0	0	0	0	0	0	1	2.96894e-06
		D691	0	0	0	0	0	0	0	0	1	0	0	0	0	0	0	1	2.96894e-06
		W139	0	0	0	0	0	0	0	0	1	0	0	0	0	0	0	1	2.96894e-06
		G062	0	0	0	0	0	0	0	0	1	0	0	0	0	0	0	1	2.96894e-06
		C714	0	0	0	0	0	0	0	0	0	0	0	1	0	0	0	1	2.96894e-06
		V144	0	0	0	0	0	0	0	0	1	0	0	0	0	0	0	1	2.96894e-06
		C450	0	0	0	0	0	0	0	0	1	0	0	0	0	0	0	1	2.96894e-06
		I079	0	0	0	0	0	0	0	0	0	1	0	0	0	0	0	1	2.96894e-06
		A058	0	0	0	0	0	0	0	0	1	0	0	0	0	0	0	1	2.96894e-06
		C501	0	0	0	0	0	0	0	0	0	0	0	0	0	0	1	1	2.96894e-06
		K519	0	0	0	0	0	0	0	0	0	0	0	0	0	0	1	1	2.96894e-06
		M358	0	0	0	0	0	0	0	0	1	0	0	0	0	0	0	1	2.96894e-06
		M340	0	0	0	0	0	0	0	0	0	0	1	0	0	0	0	1	2.96894e-06
		Y319	0	0	0	0	0	0	0	0	1	0	0	0	0	0	0	1	2.96894e-06
		E700	0	0	0	0	0	0	0	0	1	0	0	0	0	0	0	1	2.96894e-06
		C917	0	0	0	0	0	0	0	0	1	0	0	0	0	0	0	1	2.96894e-06
		D461	0	0	0	0	0	0	0	0	1	0	0	0	0	0	0	1	2.96894e-06
		W170	0	0	0	0	0	0	0	0	1	0	0	0	0	0	0	1	2.96894e-06
		G804	0	0	0	0	0	0	0	0	1	0	0	0	0	0	0	1	2.96894e-06
		F412	0	0	0	0	0	0	0	0	0	1	0	0	0	0	0	1	2.96894e-06
		F122	0	0	0	0	0	0	0	0	0	1	0	0	0	0	0	1	2.96894e-06
		K508	0	0	0	0	0	0	0	0	0	1	0	0	0	0	0	1	2.96894e-06
		P229	0	0	0	0	0	0	0	0	0	1	0	0	0	0	0	1	2.96894e-06
		V905	0	0	0	0	0	0	0	0	0	1	0	0	0	0	0	1	2.96894e-06
		K567	0	0	0	0	0	0	0	0	0	1	0	0	0	0	0	1	2.96894e-06
		X780	0	0	0	0	0	0	0	0	0	1	0	0	0	0	0	1	2.96894e-06
		X979	0	0	0	0	0	0	0	0	0	1	0	0	0	0	0	1	2.96894e-06
		A270	0	0	0	0	0	0	0	0	0	1	0	0	0	0	0	1	2.96894e-06
		C838	0	0	0	0	0	0	0	0	0	1	0	0	0	0	0	1	2.96894e-06
		W142	0	0	0	0	0	0	0	0	0	1	0	0	0	0	0	1	2.96894e-06
		G401	0	0	0	0	0	0	0	0	0	1	0	0	0	0	0	1	2.96894e-06
		G112	0	0	0	0	0	0	0	0	0	1	0	0	0	0	0	1	2.96894e-06
		A430	0	0	0	0	0	0	0	0	0	1	0	0	0	0	0	1	2.96894e-06
		A160	0	0	0	0	0	0	0	0	0	1	0	0	0	0	0	1	2.96894e-06
		A99	0	0	0	0	0	0	0	0	0	1	0	0	0	0	0	1	2.96894e-06
		B49	0	0	0	0	0	0	0	0	0	1	0	0	0	0	0	1	2.96894e-06
		V184	0	0	0	0	0	0	0	0	0	1	0	0	0	0	0	1	2.96894e-06
		M308	0	0	0	0	0	0	0	0	0	1	0	0	0	0	0	1	2.96894e-06
		K633	0	0	0	0	0	0	0	0	0	1	0	0	0	0	0	1	2.96894e-06
		V942	0	0	0	0	0	0	0	0	0	1	0	0	0	0	0	1	2.96894e-06
		N171	0	0	0	0	0	0	0	0	0	1	0	0	0	0	0	1	2.96894e-06
		V536	0	0	0	0	0	0	0	0	0	1	0	0	0	0	0	1	2.96894e-06
		C781	0	0	0	0	0	0	0	0	0	1	0	0	0	0	0	1	2.96894e-06
		E721	0	0	0	0	0	0	0	0	0	1	0	0	0	0	0	1	2.96894e-06
		C153	0	0	0	0	0	0	0	0	0	1	0	0	0	0	0	1	2.96894e-06
		C495	0	0	0	0	0	0	0	0	0	1	0	0	0	0	0	1	2.96894e-06
		J386	0	0	0	0	0	0	0	0	0	1	0	0	0	0	0	1	2.96894e-06
		X899	0	0	0	0	0	0	0	0	0	1	0	0	0	0	0	1	2.96894e-06
		G603	0	0	0	0	0	0	0	0	0	1	0	0	0	0	0	1	2.96894e-06
		C171	0	0	0	0	0	0	0	0	0	1	0	0	0	0	0	1	2.96894e-06
		K909	0	0	0	0	0	0	0	0	0	0	0	0	0	1	0	1	2.96894e-06
		N394	0	0	0	0	0	0	0	0	0	1	0	0	0	0	0	1	2.96894e-06
		V877	0	0	0	0	0	0	0	0	0	1	0	0	0	0	0	1	2.96894e-06
		X622	0	0	0	0	0	0	0	0	0	1	0	0	0	0	0	1	2.96894e-06
		A542	0	0	0	0	0	0	0	0	0	1	0	0	0	0	0	1	2.96894e-06
		E309	0	0	0	0	0	0	0	0	0	1	0	0	0	0	0	1	2.96894e-06
		B020	0	0	0	0	0	0	0	0	0	1	0	0	0	0	0	1	2.96894e-06
		K451	0	0	0	0	0	0	0	0	0	1	0	0	0	0	0	1	2.96894e-06
		D352	0	0	0	0	0	0	0	0	0	1	0	0	0	0	0	1	2.96894e-06
		M629	0	0	0	0	0	0	0	0	0	0	1	0	0	0	0	1	2.96894e-06
		P239	0	0	0	0	0	0	0	0	0	0	1	0	0	0	0	1	2.96894e-06
		B469	0	0	0	0	0	0	0	0	0	0	1	0	0	0	0	1	2.96894e-06
		Y840	0	0	0	0	0	0	0	0	0	0	1	0	0	0	0	1	2.96894e-06
		D460	0	0	0	0	0	0	0	0	0	0	1	0	0	0	0	1	2.96894e-06
		J634	0	0	0	0	0	0	0	0	0	0	1	0	0	0	0	1	2.96894e-06
		I889	0	0	0	0	0	0	0	0	0	0	1	0	0	0	0	1	2.96894e-06
		W154	0	0	0	0	0	0	0	0	0	0	1	0	0	0	0	1	2.96894e-06
		I131	0	0	0	0	0	0	0	0	0	0	1	0	0	0	0	1	2.96894e-06
		I820	0	0	0	0	0	0	0	0	0	0	1	0	0	0	0	1	2.96894e-06
		B341	0	0	0	0	0	0	0	0	0	0	1	0	0	0	0	1	2.96894e-06
		J320	0	0	0	0	0	0	0	0	0	0	1	0	0	0	0	1	2.96894e-06
		C108	0	0	0	0	0	0	0	0	0	0	0	0	0	1	0	1	2.96894e-06
		P284	0	0	0	0	0	0	0	0	0	0	1	0	0	0	0	1	2.96894e-06
		Q061	0	0	0	0	0	0	0	0	0	0	1	0	0	0	0	1	2.96894e-06
		X490	0	0	0	0	0	0	0	0	0	0	1	0	0	0	0	1	2.96894e-06
		C461	0	0	0	0	0	0	0	0	0	0	1	0	0	0	0	1	2.96894e-06
		N201	0	0	0	0	0	0	0	0	0	0	1	0	0	0	0	1	2.96894e-06
		P243	0	0	0	0	0	0	0	0	0	0	1	0	0	0	0	1	2.96894e-06
		A609	0	0	0	0	0	0	0	0	0	0	1	0	0	0	0	1	2.96894e-06
		J920	0	0	0	0	0	0	0	0	0	0	1	0	0	0	0	1	2.96894e-06
		V576	0	0	0	0	0	0	0	0	0	0	1	0	0	0	0	1	2.96894e-06
		X401	0	0	0	0	0	0	0	0	0	0	1	0	0	0	0	1	2.96894e-06
		X690	0	0	0	0	0	0	0	0	0	0	1	0	0	0	0	1	2.96894e-06
		V498	0	0	0	0	0	0	0	0	0	0	1	0	0	0	0	1	2.96894e-06
		W859	0	0	0	0	0	0	0	0	0	0	1	0	0	0	0	1	2.96894e-06
		J848	0	0	0	0	0	0	0	0	0	0	1	0	0	0	0	1	2.96894e-06
		N391	0	0	0	0	0	0	0	0	0	0	1	0	0	0	0	1	2.96894e-06
		F189	0	0	0	0	0	0	0	0	0	0	1	0	0	0	0	1	2.96894e-06
		F206	0	0	0	0	0	0	0	0	0	0	1	0	0	0	0	1	2.96894e-06
		C66	0	0	0	0	0	0	0	0	0	0	1	0	0	0	0	1	2.96894e-06
		A152	0	0	0	0	0	0	0	0	0	0	0	1	0	0	0	1	2.96894e-06
		W834	0	0	0	0	0	0	0	0	0	0	1	0	0	0	0	1	2.96894e-06
		X619	0	0	0	0	0	0	0	0	0	0	1	0	0	0	0	1	2.96894e-06
		X422	0	0	0	0	0	0	0	0	0	0	1	0	0	0	0	1	2.96894e-06
		I129	0	0	0	0	0	0	0	0	0	0	1	0	0	0	0	1	2.96894e-06
		G960	0	0	0	0	0	0	0	0	0	0	1	0	0	0	0	1	2.96894e-06
		N136	0	0	0	0	0	0	0	0	0	0	1	0	0	0	0	1	2.96894e-06
		X238	0	0	0	0	0	0	0	0	0	0	1	0	0	0	0	1	2.96894e-06
		D001	0	0	0	0	0	0	0	0	0	0	1	0	0	0	0	1	2.96894e-06
		C831	0	0	0	0	0	0	0	0	0	0	1	0	0	0	0	1	2.96894e-06
		N132	0	0	0	0	0	0	0	0	0	0	1	0	0	0	0	1	2.96894e-06
		K121	0	0	0	0	0	0	0	0	0	0	1	0	0	0	0	1	2.96894e-06
		Y712	0	0	0	0	0	0	0	0	0	0	1	0	0	0	0	1	2.96894e-06
		W875	0	0	0	0	0	0	0	0	0	0	1	0	0	0	0	1	2.96894e-06
		W178	0	0	0	0	0	0	0	0	0	0	1	0	0	0	0	1	2.96894e-06
		C902	0	0	0	0	0	0	0	0	0	0	1	0	0	0	0	1	2.96894e-06
		V119	0	0	0	0	0	0	0	0	0	0	1	0	0	0	0	1	2.96894e-06
		Y049	0	0	0	0	0	0	0	0	0	0	1	0	0	0	0	1	2.96894e-06
		X939	0	0	0	0	0	0	0	0	0	0	1	0	0	0	0	1	2.96894e-06
		Q893	0	0	0	0	0	0	0	0	0	0	1	0	0	0	0	1	2.96894e-06
		G92	0	0	0	0	0	0	0	0	0	0	1	0	0	0	0	1	2.96894e-06
		W149	0	0	0	0	0	0	0	0	0	0	1	0	0	0	0	1	2.96894e-06
		C118	0	0	0	0	0	0	0	0	0	0	0	1	0	0	0	1	2.96894e-06
		G609	0	0	0	0	0	0	0	0	0	0	0	1	0	0	0	1	2.96894e-06
		C65	0	0	0	0	0	0	0	0	0	0	0	1	0	0	0	1	2.96894e-06
		C138	0	0	0	0	0	0	0	0	0	0	0	1	0	0	0	1	2.96894e-06
		N509	0	0	0	0	0	0	0	0	0	0	0	1	0	0	0	1	2.96894e-06
		A401	0	0	0	0	0	0	0	0	0	0	0	1	0	0	0	1	2.96894e-06
		W079	0	0	0	0	0	0	0	0	0	0	0	1	0	0	0	1	2.96894e-06
		V922	0	0	0	0	0	0	0	0	0	0	0	1	0	0	0	1	2.96894e-06
		B333	0	0	0	0	0	0	0	0	0	0	0	1	0	0	0	1	2.96894e-06
		C448	0	0	0	0	0	0	0	0	0	0	0	1	0	0	0	1	2.96894e-06
		F129	0	0	0	0	0	0	0	0	0	0	0	1	0	0	0	1	2.96894e-06
		J352	0	0	0	0	0	0	0	0	0	0	0	1	0	0	0	1	2.96894e-06
		B238	0	0	0	0	0	0	0	0	0	0	0	1	0	0	0	1	2.96894e-06
		A182	0	0	0	0	0	0	0	0	0	0	0	1	0	0	0	1	2.96894e-06
		C039	0	0	0	0	0	0	0	0	0	0	0	1	0	0	0	1	2.96894e-06
		W868	0	0	0	0	0	0	0	0	0	0	0	1	0	0	0	1	2.96894e-06
		E853	0	0	0	0	0	0	0	0	0	0	0	1	0	0	0	1	2.96894e-06
		D531	0	0	0	0	0	0	0	0	0	0	0	1	0	0	0	1	2.96894e-06
		C252	0	0	0	0	0	0	0	0	0	0	0	0	1	0	0	1	2.96894e-06
		N130	0	0	0	0	0	0	0	0	0	0	0	1	0	0	0	1	2.96894e-06
		W838	0	0	0	0	0	0	0	0	0	0	0	1	0	0	0	1	2.96894e-06
		H700	0	0	0	0	0	0	0	0	0	0	0	1	0	0	0	1	2.96894e-06
		F239	0	0	0	0	0	0	0	0	0	0	0	1	0	0	0	1	2.96894e-06
		K226	0	0	0	0	0	0	0	0	0	0	0	1	0	0	0	1	2.96894e-06
		Q254	0	0	0	0	0	0	0	0	0	0	0	1	0	0	0	1	2.96894e-06
		V041	0	0	0	0	0	0	0	0	0	0	0	1	0	0	0	1	2.96894e-06
		Y290	0	0	0	0	0	0	0	0	0	0	0	1	0	0	0	1	2.96894e-06
		N320	0	0	0	0	0	0	0	0	0	0	0	1	0	0	0	1	2.96894e-06
		X207	0	0	0	0	0	0	0	0	0	0	0	1	0	0	0	1	2.96894e-06
		D151	0	0	0	0	0	0	0	0	0	0	0	1	0	0	0	1	2.96894e-06
		G402	0	0	0	0	0	0	0	0	0	0	0	0	1	0	0	1	2.96894e-06
		Q02	0	0	0	0	0	0	0	0	0	0	0	0	0	0	1	1	2.96894e-06
		J432	0	0	0	0	0	0	0	0	0	0	0	0	1	0	0	1	2.96894e-06
		C446	0	0	0	0	0	0	0	0	0	0	0	0	1	0	0	1	2.96894e-06
		D432	0	0	0	0	0	0	0	0	0	0	0	0	1	0	0	1	2.96894e-06
		A488	0	0	0	0	0	0	0	0	0	0	0	0	0	1	0	1	2.96894e-06
		A411	0	0	0	0	0	0	0	0	0	0	0	0	1	0	0	1	2.96894e-06
		B059	0	0	0	0	0	0	0	0	0	0	0	0	1	0	0	1	2.96894e-06
		Y849	0	0	0	0	0	0	0	0	0	0	0	0	1	0	0	1	2.96894e-06
		X299	0	0	0	0	0	0	0	0	0	0	0	0	1	0	0	1	2.96894e-06
		Y289	0	0	0	0	0	0	0	0	0	0	0	0	1	0	0	1	2.96894e-06
		C696	0	0	0	0	0	0	0	0	0	0	0	0	1	0	0	1	2.96894e-06
		Q446	0	0	0	0	0	0	0	0	0	0	0	0	1	0	0	1	2.96894e-06
		X430	0	0	0	0	0	0	0	0	0	0	0	0	1	0	0	1	2.96894e-06
		G248	0	0	0	0	0	0	0	0	0	0	0	0	1	0	0	1	2.96894e-06
		Y169	0	0	0	0	0	0	0	0	0	0	0	0	1	0	0	1	2.96894e-06
		K669	0	0	0	0	0	0	0	0	0	0	0	0	1	0	0	1	2.96894e-06
		X480	0	0	0	0	0	0	0	0	0	0	0	0	1	0	0	1	2.96894e-06
		V534	0	0	0	0	0	0	0	0	0	0	0	0	1	0	0	1	2.96894e-06
		W788	0	0	0	0	0	0	0	0	0	0	0	0	1	0	0	1	2.96894e-06
		L032	0	0	0	0	0	0	0	0	0	0	0	0	1	0	0	1	2.96894e-06
		W691	0	0	0	0	0	0	0	0	0	0	0	0	1	0	0	1	2.96894e-06
		W013	0	0	0	0	0	0	0	0	0	0	0	0	1	0	0	1	2.96894e-06
		B699	0	0	0	0	0	0	0	0	0	0	0	0	1	0	0	1	2.96894e-06
		W869	0	0	0	0	0	0	0	0	0	0	0	0	1	0	0	1	2.96894e-06
		E291	0	0	0	0	0	0	0	0	0	0	0	0	1	0	0	1	2.96894e-06
		I612	0	0	0	0	0	0	0	0	0	0	0	0	1	0	0	1	2.96894e-06
		E882	0	0	0	0	0	0	0	0	0	0	0	0	1	0	0	1	2.96894e-06
		C301	0	0	0	0	0	0	0	0	0	0	0	0	1	0	0	1	2.96894e-06
		G908	0	0	0	0	0	0	0	0	0	0	0	0	1	0	0	1	2.96894e-06
		C772	0	0	0	0	0	0	0	0	0	0	0	0	1	0	0	1	2.96894e-06
		J633	0	0	0	0	0	0	0	0	0	0	0	0	1	0	0	1	2.96894e-06
		J120	0	0	0	0	0	0	0	0	0	0	0	0	1	0	0	1	2.96894e-06
		X428	0	0	0	0	0	0	0	0	0	0	0	0	1	0	0	1	2.96894e-06
		C154	0	0	0	0	0	0	0	0	0	0	0	0	1	0	0	1	2.96894e-06
		G952	0	0	0	0	0	0	0	0	0	0	0	0	1	0	0	1	2.96894e-06
		E783	0	0	0	0	0	0	0	0	0	0	0	0	1	0	0	1	2.96894e-06
		N420	0	0	0	0	0	0	0	0	0	0	0	0	1	0	0	1	2.96894e-06
		A480	0	0	0	0	0	0	0	0	0	0	0	0	0	1	0	1	2.96894e-06
		F146	0	0	0	0	0	0	0	0	0	0	0	0	0	1	0	1	2.96894e-06
		H709	0	0	0	0	0	0	0	0	0	0	0	0	0	0	1	1	2.96894e-06
		Q252	0	0	0	0	0	0	0	0	0	0	0	0	0	0	1	1	2.96894e-06
		M161	0	0	0	0	0	0	0	0	0	0	0	0	0	1	0	1	2.96894e-06
		N410	0	0	0	0	0	0	0	0	0	0	0	0	0	1	0	1	2.96894e-06
		C433	0	0	0	0	0	0	0	0	0	0	0	0	0	1	0	1	2.96894e-06
		A408	0	0	0	0	0	0	0	0	0	0	0	0	0	1	0	1	2.96894e-06
		K745	0	0	0	0	0	0	0	0	0	0	0	0	0	1	0	1	2.96894e-06
		L120	0	0	0	0	0	0	0	0	0	0	0	0	0	1	0	1	2.96894e-06
		C172	0	0	0	0	0	0	0	0	0	0	0	0	0	1	0	1	2.96894e-06
		D578	0	0	0	0	0	0	0	0	0	0	0	0	0	1	0	1	2.96894e-06
		V469	0	0	0	0	0	0	0	0	0	0	0	0	0	1	0	1	2.96894e-06
		W873	0	0	0	0	0	0	0	0	0	0	0	0	0	1	0	1	2.96894e-06
		K838	0	0	0	0	0	0	0	0	0	0	0	0	0	1	0	1	2.96894e-06
		M625	0	0	0	0	0	0	0	0	0	0	0	0	0	1	0	1	2.96894e-06
		Q762	0	0	0	0	0	0	0	0	0	0	0	0	0	1	0	1	2.96894e-06
		V279	0	0	0	0	0	0	0	0	0	0	0	0	0	1	0	1	2.96894e-06
		C009	0	0	0	0	0	0	0	0	0	0	0	0	0	1	0	1	2.96894e-06
		X840	0	0	0	0	0	0	0	0	0	0	0	0	0	1	0	1	2.96894e-06
		K310	0	0	0	0	0	0	0	0	0	0	0	0	0	1	0	1	2.96894e-06
		J850	0	0	0	0	0	0	0	0	0	0	0	0	0	1	0	1	2.96894e-06
		E078	0	0	0	0	0	0	0	0	0	0	0	0	0	1	0	1	2.96894e-06
		I616	0	0	0	0	0	0	0	0	0	0	0	0	0	1	0	1	2.96894e-06
		B210	0	0	0	0	0	0	0	0	0	0	0	0	0	1	0	1	2.96894e-06
		B86	0	0	0	0	0	0	0	0	0	0	0	0	0	1	0	1	2.96894e-06
		G825	0	0	0	0	0	0	0	0	0	0	0	0	0	1	0	1	2.96894e-06
		E639	0	0	0	0	0	0	0	0	0	0	0	0	0	1	0	1	2.96894e-06
		W080	0	0	0	0	0	0	0	0	0	0	0	0	0	1	0	1	2.96894e-06
		W130	0	0	0	0	0	0	0	0	0	0	0	0	0	1	0	1	2.96894e-06
		C794	0	0	0	0	0	0	0	0	0	0	0	0	0	1	0	1	2.96894e-06
		X908	0	0	0	0	0	0	0	0	0	0	0	0	0	1	0	1	2.96894e-06
		I479	0	0	0	0	0	0	0	0	0	0	0	0	0	1	0	1	2.96894e-06
		E728	0	0	0	0	0	0	0	0	0	0	0	0	0	0	1	1	2.96894e-06
		N492	0	0	0	0	0	0	0	0	0	0	0	0	0	1	0	1	2.96894e-06
		V879	0	0	0	0	0	0	0	0	0	0	0	0	0	0	1	1	2.96894e-06
		X298	0	0	0	0	0	0	0	0	0	0	0	0	0	0	1	1	2.96894e-06
		M729	0	0	0	0	0	0	0	0	0	0	0	0	0	0	1	1	2.96894e-06
		D093	0	0	0	0	0	0	0	0	0	0	0	0	0	0	1	1	2.96894e-06
		I369	0	0	0	0	0	0	0	0	0	0	0	0	0	0	1	1	2.96894e-06
		C680	0	0	0	0	0	0	0	0	0	0	0	0	0	0	1	1	2.96894e-06
		J010	0	0	0	0	0	0	0	0	0	0	0	0	0	0	1	1	2.96894e-06
		X478	0	0	0	0	0	0	0	0	0	0	0	0	0	0	1	1	2.96894e-06
		I879	0	0	0	0	0	0	0	0	0	0	0	0	0	0	1	1	2.96894e-06
		X625	0	0	0	0	0	0	0	0	0	0	0	0	0	0	1	1	2.96894e-06
		M891	0	0	0	0	0	0	0	0	0	0	0	0	0	0	1	1	2.96894e-06
		L984	0	0	0	0	0	0	0	0	0	0	0	0	0	0	1	1	2.96894e-06
		F302	0	0	0	0	0	0	0	0	0	0	0	0	0	0	1	1	2.96894e-06
		Y209	0	0	0	0	0	0	0	0	0	0	0	0	0	0	1	1	2.96894e-06
		X935	0	0	0	0	0	0	0	0	0	0	0	0	0	0	1	1	2.96894e-06
		M189	0	0	0	0	0	0	0	0	0	0	0	0	0	0	1	1	2.96894e-06
		B942	0	0	0	0	0	0	0	0	0	0	0	0	0	0	1	1	2.96894e-06
		M808	0	0	0	0	0	0	0	0	0	0	0	0	0	0	1	1	2.96894e-06
		Y009	0	0	0	0	0	0	0	0	0	0	0	0	0	0	1	1	2.96894e-06
		A431	0	0	0	0	0	0	0	0	0	0	0	0	0	0	1	1	2.96894e-06
		W202	0	0	0	0	0	0	0	0	0	0	0	0	0	0	1	1	2.96894e-06
		B258	0	0	0	0	0	0	0	0	0	0	0	0	0	0	1	1	2.96894e-06
		I518	0	0	0	0	0	0	0	0	0	0	0	0	0	0	1	1	2.96894e-06
		Y899	0	0	0	0	0	0	0	0	0	0	0	0	0	0	1	1	2.96894e-06
		V285	0	0	0	0	0	0	0	0	0	0	0	0	0	0	1	1	2.96894e-06
		Q246	0	0	0	0	0	0	0	0	0	0	0	0	0	0	1	1	2.96894e-06
		X237	0	0	0	0	0	0	0	0	0	0	0	0	0	0	1	1	2.96894e-06
		C55	0	0	0	0	0	0	0	0	0	0	0	0	0	0	0	0	0
		C500	0	0	0	0	0	0	0	0	0	0	0	0	0	0	0	0	0
		O100	0	0	0	0	0	0	0	0	0	0	0	0	0	0	0	0	0
		C539	0	0	0	0	0	0	0	0	0	0	0	0	0	0	0	0	0
		D608	0	0	0	0	0	0	0	0	0	0	0	0	0	0	0	0	0
		C579	0	0	0	0	0	0	0	0	0	0	0	0	0	0	0	0	0
		N824	0	0	0	0	0	0	0	0	0	0	0	0	0	0	0	0	0
		C494	0	0	0	0	0	0	0	0	0	0	0	0	0	0	0	0	0
		O149	0	0	0	0	0	0	0	0	0	0	0	0	0	0	0	0	0
		O992	0	0	0	0	0	0	0	0	0	0	0	0	0	0	0	0	0
		E041	0	0	0	0	0	0	0	0	0	0	0	0	0	0	0	0	0
		O101	0	0	0	0	0	0	0	0	0	0	0	0	0	0	0	0	0
		O723	0	0	0	0	0	0	0	0	0	0	0	0	0	0	0	0	0
		O159	0	0	0	0	0	0	0	0	0	0	0	0	0	0	0	0	0
		K820	0	0	0	0	0	0	0	0	0	0	0	0	0	0	0	0	0
		K928	0	0	0	0	0	0	0	0	0	0	0	0	0	0	0	0	0
		O96	0	0	0	0	0	0	0	0	0	0	0	0	0	0	0	0	0
		B159	0	0	0	0	0	0	0	0	0	0	0	0	0	0	0	0	0
		O721	0	0	0	0	0	0	0	0	0	0	0	0	0	0	0	0	0
		H669	0	0	0	0	0	0	0	0	0	0	0	0	0	0	0	0	0
		D369	0	0	0	0	0	0	0	0	0	0	0	0	0	0	0	0	0
		Q401	0	0	0	0	0	0	0	0	0	0	0	0	0	0	0	0	0
		N72	0	0	0	0	0	0	0	0	0	0	0	0	0	0	0	0	0
		G831	0	0	0	0	0	0	0	0	0	0	0	0	0	0	0	0	0
		I516	0	0	0	0	0	0	0	0	0	0	0	0	0	0	0	0	0
		C519	0	0	0	0	0	0	0	0	0	0	0	0	0	0	0	0	0
		L080	0	0	0	0	0	0	0	0	0	0	0	0	0	0	0	0	0
		M320	0	0	0	0	0	0	0	0	0	0	0	0	0	0	0	0	0
		D642	0	0	0	0	0	0	0	0	0	0	0	0	0	0	0	0	0
		M059	0	0	0	0	0	0	0	0	0	0	0	0	0	0	0	0	0
		Y309	0	0	0	0	0	0	0	0	0	0	0	0	0	0	0	0	0
		I673	0	0	0	0	0	0	0	0	0	0	0	0	0	0	0	0	0
		A390	0	0	0	0	0	0	0	0	0	0	0	0	0	0	0	0	0
		C56	0	0	0	0	0	0	0	0	0	0	0	0	0	0	0	0	0
		E881	0	0	0	0	0	0	0	0	0	0	0	0	0	0	0	0	0
		D090	0	0	0	0	0	0	0	0	0	0	0	0	0	0	0	0	0
		O994	0	0	0	0	0	0	0	0	0	0	0	0	0	0	0	0	0
		J704	0	0	0	0	0	0	0	0	0	0	0	0	0	0	0	0	0
		B519	0	0	0	0	0	0	0	0	0	0	0	0	0	0	0	0	0
		M165	0	0	0	0	0	0	0	0	0	0	0	0	0	0	0	0	0
		I99	0	0	0	0	0	0	0	0	0	0	0	0	0	0	0	0	0
		F919	0	0	0	0	0	0	0	0	0	0	0	0	0	0	0	0	0
		H570	0	0	0	0	0	0	0	0	0	0	0	0	0	0	0	0	0
		K824	0	0	0	0	0	0	0	0	0	0	0	0	0	0	0	0	0
		F500	0	0	0	0	0	0	0	0	0	0	0	0	0	0	0	0	0
		M859	0	0	0	0	0	0	0	0	0	0	0	0	0	0	0	0	0
		V221	0	0	0	0	0	0	0	0	0	0	0	0	0	0	0	0	0
		K711	0	0	0	0	0	0	0	0	0	0	0	0	0	0	0	0	0
		K558	0	0	0	0	0	0	0	0	0	0	0	0	0	0	0	0	0
		M800	0	0	0	0	0	0	0	0	0	0	0	0	0	0	0	0	0
		M722	0	0	0	0	0	0	0	0	0	0	0	0	0	0	0	0	0
		M802	0	0	0	0	0	0	0	0	0	0	0	0	0	0	0	0	0
		W100	0	0	0	0	0	0	0	0	0	0	0	0	0	0	0	0	0
		C549	0	0	0	0	0	0	0	0	0	0	0	0	0	0	0	0	0
		L930	0	0	0	0	0	0	0	0	0	0	0	0	0	0	0	0	0
		C570	0	0	0	0	0	0	0	0	0	0	0	0	0	0	0	0	0
		Q212	0	0	0	0	0	0	0	0	0	0	0	0	0	0	0	0	0
		C541	0	0	0	0	0	0	0	0	0	0	0	0	0	0	0	0	0
		C436	0	0	0	0	0	0	0	0	0	0	0	0	0	0	0	0	0
		D447	0	0	0	0	0	0	0	0	0	0	0	0	0	0	0	0	0
		D259	0	0	0	0	0	0	0	0	0	0	0	0	0	0	0	0	0
		C764	0	0	0	0	0	0	0	0	0	0	0	0	0	0	0	0	0
		N921	0	0	0	0	0	0	0	0	0	0	0	0	0	0	0	0	0
		X832	0	0	0	0	0	0	0	0	0	0	0	0	0	0	0	0	0
		G379	0	0	0	0	0	0	0	0	0	0	0	0	0	0	0	0	0
		X589	0	0	0	0	0	0	0	0	0	0	0	0	0	0	0	0	0
		N61	0	0	0	0	0	0	0	0	0	0	0	0	0	0	0	0	0
		O95	0	0	0	0	0	0	0	0	0	0	0	0	0	0	0	0	0
		O903	0	0	0	0	0	0	0	0	0	0	0	0	0	0	0	0	0
		F790	0	0	0	0	0	0	0	0	0	0	0	0	0	0	0	0	0
		G588	0	0	0	0	0	0	0	0	0	0	0	0	0	0	0	0	0
		I848	0	0	0	0	0	0	0	0	0	0	0	0	0	0	0	0	0
		E065	0	0	0	0	0	0	0	0	0	0	0	0	0	0	0	0	0
		M852	0	0	0	0	0	0	0	0	0	0	0	0	0	0	0	0	0
		C459	0	0	0	0	0	0	0	0	0	0	0	0	0	0	0	0	0
		K552	0	0	0	0	0	0	0	0	0	0	0	0	0	0	0	0	0
		A428	0	0	0	0	0	0	0	0	0	0	0	0	0	0	0	0	0
		Y000	0	0	0	0	0	0	0	0	0	0	0	0	0	0	0	0	0
		D073	0	0	0	0	0	0	0	0	0	0	0	0	0	0	0	0	0
		G822	0	0	0	0	0	0	0	0	0	0	0	0	0	0	0	0	0
		E030	0	0	0	0	0	0	0	0	0	0	0	0	0	0	0	0	0
		Q043	0	0	0	0	0	0	0	0	0	0	0	0	0	0	0	0	0
		F312	0	0	0	0	0	0	0	0	0	0	0	0	0	0	0	0	0
		W194	0	0	0	0	0	0	0	0	0	0	0	0	0	0	0	0	0
		Y238	0	0	0	0	0	0	0	0	0	0	0	0	0	0	0	0	0
		X549	0	0	0	0	0	0	0	0	0	0	0	0	0	0	0	0	0
		C52	0	0	0	0	0	0	0	0	0	0	0	0	0	0	0	0	0
		X010	0	0	0	0	0	0	0	0	0	0	0	0	0	0	0	0	0
		J322	0	0	0	0	0	0	0	0	0	0	0	0	0	0	0	0	0
		E210	0	0	0	0	0	0	0	0	0	0	0	0	0	0	0	0	0
		D849	0	0	0	0	0	0	0	0	0	0	0	0	0	0	0	0	0
		D181	0	0	0	0	0	0	0	0	0	0	0	0	0	0	0	0	0
		C185	0	0	0	0	0	0	0	0	0	0	0	0	0	0	0	0	0
		D869	0	0	0	0	0	0	0	0	0	0	0	0	0	0	0	0	0
		G212	0	0	0	0	0	0	0	0	0	0	0	0	0	0	0	0	0
		I633	0	0	0	0	0	0	0	0	0	0	0	0	0	0	0	0	0
		H830	0	0	0	0	0	0	0	0	0	0	0	0	0	0	0	0	0
		O882	0	0	0	0	0	0	0	0	0	0	0	0	0	0	0	0	0
		C796	0	0	0	0	0	0	0	0	0	0	0	0	0	0	0	0	0
		Y050	0	0	0	0	0	0	0	0	0	0	0	0	0	0	0	0	0
		F781	0	0	0	0	0	0	0	0	0	0	0	0	0	0	0	0	0
		D434	0	0	0	0	0	0	0	0	0	0	0	0	0	0	0	0	0
		E328	0	0	0	0	0	0	0	0	0	0	0	0	0	0	0	0	0
		E02	0	0	0	0	0	0	0	0	0	0	0	0	0	0	0	0	0
		I501	0	0	0	0	0	0	0	0	0	0	0	0	0	0	0	0	0
		C538	0	0	0	0	0	0	0	0	0	0	0	0	0	0	0	0	0
		E538	0	0	0	0	0	0	0	0	0	0	0	0	0	0	0	0	0
		G959	0	0	0	0	0	0	0	0	0	0	0	0	0	0	0	0	0
		O998	0	0	0	0	0	0	0	0	0	0	0	0	0	0	0	0	0
		O16	0	0	0	0	0	0	0	0	0	0	0	0	0	0	0	0	0
		I775	0	0	0	0	0	0	0	0	0	0	0	0	0	0	0	0	0
		L108	0	0	0	0	0	0	0	0	0	0	0	0	0	0	0	0	0
		N321	0	0	0	0	0	0	0	0	0	0	0	0	0	0	0	0	0
		K122	0	0	0	0	0	0	0	0	0	0	0	0	0	0	0	0	0
		X080	0	0	0	0	0	0	0	0	0	0	0	0	0	0	0	0	0
		C850	0	0	0	0	0	0	0	0	0	0	0	0	0	0	0	0	0
		Q790	0	0	0	0	0	0	0	0	0	0	0	0	0	0	0	0	0
		C688	0	0	0	0	0	0	0	0	0	0	0	0	0	0	0	0	0
		Q612	0	0	0	0	0	0	0	0	0	0	0	0	0	0	0	0	0
		N820	0	0	0	0	0	0	0	0	0	0	0	0	0	0	0	0	0
		K900	0	0	0	0	0	0	0	0	0	0	0	0	0	0	0	0	0
		M478	0	0	0	0	0	0	0	0	0	0	0	0	0	0	0	0	0
		E052	0	0	0	0	0	0	0	0	0	0	0	0	0	0	0	0	0
		D391	0	0	0	0	0	0	0	0	0	0	0	0	0	0	0	0	0
		N738	0	0	0	0	0	0	0	0	0	0	0	0	0	0	0	0	0
		B650	0	0	0	0	0	0	0	0	0	0	0	0	0	0	0	0	0
		O151	0	0	0	0	0	0	0	0	0	0	0	0	0	0	0	0	0
		E807	0	0	0	0	0	0	0	0	0	0	0	0	0	0	0	0	0
		B779	0	0	0	0	0	0	0	0	0	0	0	0	0	0	0	0	0
		F051	0	0	0	0	0	0	0	0	0	0	0	0	0	0	0	0	0
		C792	0	0	0	0	0	0	0	0	0	0	0	0	0	0	0	0	0
		L033	0	0	0	0	0	0	0	0	0	0	0	0	0	0	0	0	0
		Q605	0	0	0	0	0	0	0	0	0	0	0	0	0	0	0	0	0
		E743	0	0	0	0	0	0	0	0	0	0	0	0	0	0	0	0	0
		N719	0	0	0	0	0	0	0	0	0	0	0	0	0	0	0	0	0
		Q632	0	0	0	0	0	0	0	0	0	0	0	0	0	0	0	0	0
		X449	0	0	0	0	0	0	0	0	0	0	0	0	0	0	0	0	0
		D448	0	0	0	0	0	0	0	0	0	0	0	0	0	0	0	0	0
		F320	0	0	0	0	0	0	0	0	0	0	0	0	0	0	0	0	0
		I072	0	0	0	0	0	0	0	0	0	0	0	0	0	0	0	0	0
		B378	0	0	0	0	0	0	0	0	0	0	0	0	0	0	0	0	0
		W670	0	0	0	0	0	0	0	0	0	0	0	0	0	0	0	0	0
		Q244	0	0	0	0	0	0	0	0	0	0	0	0	0	0	0	0	0
		C224	0	0	0	0	0	0	0	0	0	0	0	0	0	0	0	0	0
		A427	0	0	0	0	0	0	0	0	0	0	0	0	0	0	0	0	0
		P240	0	0	0	0	0	0	0	0	0	0	0	0	0	0	0	0	0
		I070	0	0	0	0	0	0	0	0	0	0	0	0	0	0	0	0	0
		K823	0	0	0	0	0	0	0	0	0	0	0	0	0	0	0	0	0
		E271	0	0	0	0	0	0	0	0	0	0	0	0	0	0	0	0	0
		O11	0	0	0	0	0	0	0	0	0	0	0	0	0	0	0	0	0
		E340	0	0	0	0	0	0	0	0	0	0	0	0	0	0	0	0	0
		L509	0	0	0	0	0	0	0	0	0	0	0	0	0	0	0	0	0
		K419	0	0	0	0	0	0	0	0	0	0	0	0	0	0	0	0	0
		M179	0	0	0	0	0	0	0	0	0	0	0	0	0	0	0	0	0
		Q243	0	0	0	0	0	0	0	0	0	0	0	0	0	0	0	0	0
		V039	0	0	0	0	0	0	0	0	0	0	0	0	0	0	0	0	0
		E164	0	0	0	0	0	0	0	0	0	0	0	0	0	0	0	0	0
		O150	0	0	0	0	0	0	0	0	0	0	0	0	0	0	0	0	0
		C442	0	0	0	0	0	0	0	0	0	0	0	0	0	0	0	0	0
		N250	0	0	0	0	0	0	0	0	0	0	0	0	0	0	0	0	0
		N814	0	0	0	0	0	0	0	0	0	0	0	0	0	0	0	0	0
		F058	0	0	0	0	0	0	0	0	0	0	0	0	0	0	0	0	0
		A022	0	0	0	0	0	0	0	0	0	0	0	0	0	0	0	0	0
		D097	0	0	0	0	0	0	0	0	0	0	0	0	0	0	0	0	0
		G723	0	0	0	0	0	0	0	0	0	0	0	0	0	0	0	0	0
		B269	0	0	0	0	0	0	0	0	0	0	0	0	0	0	0	0	0
		D143	0	0	0	0	0	0	0	0	0	0	0	0	0	0	0	0	0
		Q233	0	0	0	0	0	0	0	0	0	0	0	0	0	0	0	0	0
		C504	0	0	0	0	0	0	0	0	0	0	0	0	0	0	0	0	0
		F110	0	0	0	0	0	0	0	0	0	0	0	0	0	0	0	0	0
		L109	0	0	0	0	0	0	0	0	0	0	0	0	0	0	0	0	0
		I898	0	0	0	0	0	0	0	0	0	0	0	0	0	0	0	0	0
		O141	0	0	0	0	0	0	0	0	0	0	0	0	0	0	0	0	0
		W694	0	0	0	0	0	0	0	0	0	0	0	0	0	0	0	0	0
		O235	0	0	0	0	0	0	0	0	0	0	0	0	0	0	0	0	0
		E68	0	0	0	0	0	0	0	0	0	0	0	0	0	0	0	0	0
		N138	0	0	0	0	0	0	0	0	0	0	0	0	0	0	0	0	0
		X648	0	0	0	0	0	0	0	0	0	0	0	0	0	0	0	0	0
		E169	0	0	0	0	0	0	0	0	0	0	0	0	0	0	0	0	0
		N759	0	0	0	0	0	0	0	0	0	0	0	0	0	0	0	0	0
		D374	0	0	0	0	0	0	0	0	0	0	0	0	0	0	0	0	0
		E010	0	0	0	0	0	0	0	0	0	0	0	0	0	0	0	0	0
		V486	0	0	0	0	0	0	0	0	0	0	0	0	0	0	0	0	0
		K717	0	0	0	0	0	0	0	0	0	0	0	0	0	0	0	0	0
		I308	0	0	0	0	0	0	0	0	0	0	0	0	0	0	0	0	0
		D530	0	0	0	0	0	0	0	0	0	0	0	0	0	0	0	0	0
		B018	0	0	0	0	0	0	0	0	0	0	0	0	0	0	0	0	0
		D069	0	0	0	0	0	0	0	0	0	0	0	0	0	0	0	0	0
		C540	0	0	0	0	0	0	0	0	0	0	0	0	0	0	0	0	0
		E215	0	0	0	0	0	0	0	0	0	0	0	0	0	0	0	0	0
		G450	0	0	0	0	0	0	0	0	0	0	0	0	0	0	0	0	0
		F328	0	0	0	0	0	0	0	0	0	0	0	0	0	0	0	0	0
		A400	0	0	0	0	0	0	0	0	0	0	0	0	0	0	0	0	0
		F259	0	0	0	0	0	0	0	0	0	0	0	0	0	0	0	0	0
		M082	0	0	0	0	0	0	0	0	0	0	0	0	0	0	0	0	0
		K223	0	0	0	0	0	0	0	0	0	0	0	0	0	0	0	0	0
		C508	0	0	0	0	0	0	0	0	0	0	0	0	0	0	0	0	0
		H819	0	0	0	0	0	0	0	0	0	0	0	0	0	0	0	0	0
		M159	0	0	0	0	0	0	0	0	0	0	0	0	0	0	0	0	0
		I742	0	0	0	0	0	0	0	0	0	0	0	0	0	0	0	0	0
		D699	0	0	0	0	0	0	0	0	0	0	0	0	0	0	0	0	0
		I864	0	0	0	0	0	0	0	0	0	0	0	0	0	0	0	0	0
		C767	0	0	0	0	0	0	0	0	0	0	0	0	0	0	0	0	0
		W229	0	0	0	0	0	0	0	0	0	0	0	0	0	0	0	0	0
		W999	0	0	0	0	0	0	0	0	0	0	0	0	0	0	0	0	0
		M191	0	0	0	0	0	0	0	0	0	0	0	0	0	0	0	0	0
		I788	0	0	0	0	0	0	0	0	0	0	0	0	0	0	0	0	0
		M052	0	0	0	0	0	0	0	0	0	0	0	0	0	0	0	0	0
		F319	0	0	0	0	0	0	0	0	0	0	0	0	0	0	0	0	0
		J029	0	0	0	0	0	0	0	0	0	0	0	0	0	0	0	0	0
		G404	0	0	0	0	0	0	0	0	0	0	0	0	0	0	0	0	0
		C922	0	0	0	0	0	0	0	0	0	0	0	0	0	0	0	0	0
		O742	0	0	0	0	0	0	0	0	0	0	0	0	0	0	0	0	0
		Y142	0	0	0	0	0	0	0	0	0	0	0	0	0	0	0	0	0
		D015	0	0	0	0	0	0	0	0	0	0	0	0	0	0	0	0	0
		D059	0	0	0	0	0	0	0	0	0	0	0	0	0	0	0	0	0
		L511	0	0	0	0	0	0	0	0	0	0	0	0	0	0	0	0	0
		X448	0	0	0	0	0	0	0	0	0	0	0	0	0	0	0	0	0
		O995	0	0	0	0	0	0	0	0	0	0	0	0	0	0	0	0	0
		W012	0	0	0	0	0	0	0	0	0	0	0	0	0	0	0	0	0
		G900	0	0	0	0	0	0	0	0	0	0	0	0	0	0	0	0	0
		D099	0	0	0	0	0	0	0	0	0	0	0	0	0	0	0	0	0
		E060	0	0	0	0	0	0	0	0	0	0	0	0	0	0	0	0	0
		I159	0	0	0	0	0	0	0	0	0	0	0	0	0	0	0	0	0
		I888	0	0	0	0	0	0	0	0	0	0	0	0	0	0	0	0	0
		F419	0	0	0	0	0	0	0	0	0	0	0	0	0	0	0	0	0
		E617	0	0	0	0	0	0	0	0	0	0	0	0	0	0	0	0	0
		N818	0	0	0	0	0	0	0	0	0	0	0	0	0	0	0	0	0
		K210	0	0	0	0	0	0	0	0	0	0	0	0	0	0	0	0	0
		O039	0	0	0	0	0	0	0	0	0	0	0	0	0	0	0	0	0
[truncated: 181 more rows]

## Sheet: Female
		UCs	2006	2007	2008	2009	2010	2011	2012	2013	2014	2015	2016	2017	2018	2019	2020	TOTAL	%
		I219	9616	9159	9454	9224	10503	10728	10871	11392	10414	11432	10551	10555	10940	10194	8877	153910	0.6493
		E149	779	862	897	978	1063	1096	1133	1137	1029	1137	928	917	965	846	736	14503	0.0611838
		I251	642	667	631	542	525	562	535	516	669	638	637	679	606	625	519	8993	0.0379387
		I259	450	451	422	364	451	420	331	393	373	376	396	397	354	381	349	5908	0.0249241
		I255	306	393	376	345	332	338	373	342	413	372	402	458	459	429	418	5756	0.0242828
		I248	459	514	510	461	387	349	307	320	273	286	184	170	156	144	113	4633	0.0195452
		E119	68	80	70	71	100	123	107	165	169	197	158	186	237	226	197	2154	0.00908707
		I210	77	90	83	81	121	130	140	158	125	125	98	130	179	201	131	1869	0.00788475
		J449	122	113	85	89	133	132	134	142	106	145	107	111	136	108	72	1735	0.00731944
		I64	113	116	116	115	116	160	132	141	106	127	106	94	100	102	85	1729	0.00729413
		E142	71	93	70	109	73	99	106	115	112	127	96	92	118	87	79	1447	0.00610445
		E148	68	66	83	93	104	130	119	128	77	113	84	77	96	106	82	1426	0.00601586
		E788	87	76	79	68	91	101	118	116	91	105	97	80	78	63	61	1311	0.00553071
		I249	20	22	25	28	40	56	47	66	62	93	115	117	109	151	138	1089	0.00459416
		E669	64	54	51	61	61	93	76	85	82	94	73	73	75	79	67	1088	0.00458994
		J189	30	61	40	56	61	68	71	83	80	102	99	82	76	89	65	1063	0.00448448
		I258	65	47	63	36	54	53	77	81	61	55	61	67	68	78	48	914	0.00385589
		I420	46	59	42	59	54	50	45	51	54	37	40	59	50	50	34	730	0.00307965
		I429	44	41	51	41	43	48	59	45	48	41	35	34	43	31	25	629	0.00265356
		I213	38	26	22	23	17	28	36	38	20	43	41	61	75	95	66	629	0.00265356
		I209	68	40	48	46	53	43	35	48	34	41	30	35	40	30	21	612	0.00258184
		I694	28	26	37	31	35	31	38	51	47	44	37	36	36	36	32	545	0.00229919
		G309	16	13	19	18	26	25	41	55	44	49	39	49	49	55	42	540	0.0022781
		B572	44	41	30	30	42	31	43	54	31	36	26	27	35	35	29	534	0.00225278
		E109	14	17	16	22	22	23	34	40	44	40	41	38	54	57	48	510	0.00215154
		N189	19	26	27	19	26	28	32	45	49	34	38	28	28	37	36	472	0.00199123
		I211	31	22	13	15	24	37	26	25	19	21	28	37	74	54	41	467	0.00197013
		I422	24	29	28	35	22	21	17	21	34	20	26	47	32	59	32	447	0.00188576
		I678	27	27	30	26	21	27	38	41	25	41	33	33	29	22	18	438	0.00184779
		E147	18	11	20	23	28	44	37	29	16	37	31	29	31	34	20	408	0.00172123
		E145	18	16	26	34	30	28	33	19	29	27	21	29	28	30	18	386	0.00162842
		E668	21	12	30	21	37	26	23	25	22	28	28	21	26	30	14	364	0.00153561
		E780	25	15	16	23	17	23	28	31	22	38	26	25	31	23	18	361	0.00152295
		I250	24	13	16	14	20	26	36	23	23	28	38	26	39	19	15	360	0.00151873
		J440	11	21	12	22	15	23	17	29	28	33	28	33	35	40	13	360	0.00151873
		E118	10	7	17	15	18	21	19	32	18	20	22	32	31	41	29	332	0.00140061
		J459	32	20	24	28	25	25	32	26	18	18	10	17	21	19	8	323	0.00136264
		I212	6	14	6	10	11	28	27	22	12	12	28	37	37	44	21	315	0.00132889
		J439	18	13	19	21	18	24	30	34	17	19	25	17	23	18	14	310	0.0013078
		N390	8	9	8	6	16	23	12	18	32	26	24	29	31	38	24	304	0.00128248
		E140	21	16	22	19	27	31	37	43	16	21	11	19	8	5	6	302	0.00127405
		B342	1	0	0	0	0	0	0	0	0	0	0	0	0	0	301	302	0.00127405
		C509	8	14	14	17	16	21	16	20	20	26	25	19	30	28	23	297	0.00125295
		A419	11	20	17	21	6	16	17	15	16	27	29	21	23	31	23	293	0.00123608
		I252	38	34	60	56	47	45	0	0	0	0	0	0	1	0	0	281	0.00118545
		N179	11	14	16	18	13	20	15	21	20	24	19	18	23	24	14	270	0.00113905
		E141	18	18	15	19	14	17	11	21	20	28	18	15	17	19	13	263	0.00110952
		J180	12	26	29	10	15	18	13	22	20	16	14	18	24	14	6	257	0.00108421
		I229	13	14	13	17	16	24	21	12	13	18	16	24	25	16	13	255	0.00107577
		E112	3	13	5	7	13	13	21	28	19	21	20	21	29	17	14	244	0.00102936
		C349	8	16	8	8	19	9	14	21	15	28	16	14	26	19	8	229	0.000966082
		F102	22	9	12	14	10	22	18	16	9	19	13	15	18	6	7	210	0.000885926
		I269	11	18	12	10	14	18	9	14	18	11	17	16	10	17	13	208	0.000877489
		I350	8	11	15	11	13	15	13	17	21	8	12	6	21	14	16	201	0.000847958
		E108	12	5	6	7	9	13	15	20	19	13	14	13	14	17	21	198	0.000835302
		N19	8	9	12	16	16	14	23	12	9	16	6	10	14	10	6	181	0.000763584
		E785	15	8	7	11	11	6	9	18	9	18	9	13	15	11	16	176	0.000742491
		J159	4	7	3	5	10	6	6	10	11	18	11	20	22	20	21	174	0.000734053
		I619	11	14	11	12	12	8	14	11	12	18	7	14	11	8	9	172	0.000725616
		E889	2	5	4	3	7	6	5	10	22	25	23	15	18	20	7	172	0.000725616
		E117	3	0	5	9	17	8	12	11	11	20	9	15	18	19	12	169	0.00071296
		I214	8	6	4	4	4	6	13	9	7	12	19	16	22	18	18	166	0.000700304
		E789	5	5	5	4	6	10	8	9	8	17	10	12	19	25	18	161	0.00067921
		E107	5	2	5	7	12	11	11	8	9	18	15	8	16	18	14	159	0.000670773
		I710	8	13	16	6	7	10	4	3	9	18	8	13	10	13	7	145	0.000611711
		D649	5	10	7	10	11	8	12	13	12	14	7	6	8	16	3	142	0.000599055
		I279	5	9	9	11	13	8	12	11	13	9	8	14	3	11	6	142	0.000599055
		G20	7	5	5	6	6	12	9	12	13	10	8	11	11	5	15	135	0.000569524
		E039	6	6	9	11	13	9	6	12	4	13	6	7	11	11	9	133	0.000561087
		A09	8	11	5	8	9	5	9	8	6	12	13	5	10	8	3	120	0.000506244
		C539	3	7	7	2	5	7	9	11	8	13	8	12	5	10	6	113	0.000476713
		E46	7	5	6	4	9	11	10	8	6	11	9	8	7	5	6	112	0.000472494
		I256	15	3	3	11	1	4	8	7	6	8	13	3	10	11	7	110	0.000464057
		E110	6	7	8	6	3	6	5	6	8	7	4	8	12	11	13	110	0.000464057
		I340	7	9	2	7	5	9	5	7	11	7	5	7	10	7	10	108	0.000455619
		I38	10	4	8	3	7	8	9	7	9	9	9	9	8	3	4	107	0.000451401
		M321	7	3	2	7	8	8	8	7	6	6	10	10	7	15	2	106	0.000447182
		J988	6	7	4	12	6	11	11	6	10	9	6	5	7	4	1	105	0.000442963
		I253	6	7	9	5	10	7	8	5	10	12	7	2	2	12	3	105	0.000442963
		C169	3	5	9	5	8	7	9	3	6	11	8	6	9	9	7	105	0.000442963
		I739	6	9	6	3	7	5	4	6	10	5	6	9	6	11	11	104	0.000438745
		E115	5	2	3	2	6	7	7	3	9	9	9	13	13	4	12	104	0.000438745
		C189	7	5	5	3	4	8	6	8	10	6	11	7	4	8	6	98	0.000413432
		I10	4	4	3	5	13	7	12	5	9	9	6	8	5	5	3	98	0.000413432
		I639	5	1	7	4	1	4	8	2	2	2	4	8	17	16	10	91	0.000383901
		E146	1	8	5	4	11	8	7	6	6	8	3	1	7	6	5	86	0.000362808
		G409	3	4	4	6	12	4	7	11	6	3	6	3	6	5	4	84	0.000354371
		J984	8	4	8	8	7	8	5	10	4	4	1	4	4	5	2	82	0.000345933
		I719	4	4	3	7	4	8	11	3	6	5	7	6	6	3	5	82	0.000345933
		I270	3	7	5	5	4	7	6	4	9	10	4	5	6	1	4	80	0.000337496
		W189	1	5	3	4	2	4	4	4	7	6	6	11	8	9	6	80	0.000337496
		E102	1	2	4	5	2	6	3	8	1	5	5	5	8	9	15	79	0.000333277
		E059	6	7	3	7	5	8	6	3	4	6	3	4	7	5	3	77	0.00032484
		E100	4	1	5	3	8	11	2	9	4	3	4	6	7	6	1	74	0.000312184
		K550	6	6	9	13	5	4	4	2	5	3	4	3	2	3	4	73	0.000307965
		I609	4	7	3	4	3	3	3	4	9	3	2	6	4	10	6	71	0.000299528
		J841	4	8	4	4	5	6	0	4	4	1	5	8	10	4	3	70	0.000295309
		I802	4	4	4	3	4	4	2	8	6	5	6	4	5	8	3	70	0.000295309
		C259	6	2	5	3	3	5	2	4	4	4	7	3	6	10	5	69	0.00029109
		K922	5	2	9	4	1	7	4	4	1	5	7	7	5	3	4	68	0.000286871
		K746	2	3	7	4	6	8	5	2	9	3	1	5	3	5	5	68	0.000286871
		J448	4	1	7	7	5	6	6	5	6	4	5	2	4	3	2	67	0.000282653
		I254	4	5	3	3	2	3	2	1	6	3	8	9	5	8	5	67	0.000282653
		J441	2	1	1	0	2	2	1	1	3	10	4	5	6	16	13	67	0.000282653
		J690	0	2	3	3	4	5	8	2	4	2	8	7	5	7	7	67	0.000282653
		C80	3	3	3	8	2	2	3	8	6	6	6	5	1	3	5	64	0.000269997
		E105	0	0	1	4	3	4	4	3	3	3	6	5	6	6	16	64	0.000269997
		I718	5	5	5	7	3	1	3	7	6	3	3	3	1	4	6	62	0.000261559
		C229	2	4	4	3	6	4	5	4	4	4	2	4	4	7	5	62	0.000261559
		W199	2	4	7	3	2	3	5	5	3	5	5	6	5	5	2	62	0.000261559
		I428	1	2	2	5	2	3	5	3	2	4	7	2	7	8	9	62	0.000261559
		I059	3	9	3	6	5	2	5	5	5	3	4	4	2	2	3	61	0.000257341
		E660	2	2	1	4	3	2	2	6	1	4	3	10	7	8	6	61	0.000257341
		E782	2	1	4	3	1	3	4	6	4	6	3	8	9	3	4	61	0.000257341
		E101	2	3	1	1	5	2	5	5	6	3	7	7	6	3	5	61	0.000257341
		I714	3	4	2	6	5	2	3	1	5	2	8	6	4	7	2	60	0.000253122
		E86	3	4	5	2	6	3	5	7	4	6	3	2	1	3	6	60	0.000253122
		Q249	5	7	7	3	2	9	5	5	4	2	0	4	3	2	1	59	0.000248903
		E111	1	3	3	3	2	5	4	5	4	2	7	5	4	5	4	57	0.000240466
		E116	1	1	2	1	3	1	2	4	3	4	5	8	13	5	4	57	0.000240466
		Y349	2	0	4	4	1	5	2	3	4	7	5	3	4	5	6	55	0.000232028
		W180	1	2	1	1	6	2	1	0	4	4	2	8	3	11	9	55	0.000232028
		C56	1	1	0	3	5	7	4	5	5	4	2	2	9	4	3	55	0.000232028
		K810	4	2	1	6	3	3	4	3	7	3	3	3	4	6	2	54	0.00022781
		K920	3	3	4	3	8	2	3	2	4	3	3	2	0	8	6	54	0.00022781
		I220	5	3	5	3	6	2	2	1	1	5	4	1	9	3	3	53	0.000223591
		N039	1	0	1	1	0	4	3	0	1	6	3	7	6	10	10	53	0.000223591
		Q245	3	5	5	9	5	2	6	1	6	0	4	0	2	1	1	50	0.000210935
		I672	9	5	8	6	4	2	2	2	4	1	3	0	2	0	1	49	0.000206716
		C55	6	1	3	3	4	5	3	3	8	4	2	2	2	3	0	49	0.000206716
		I421	2	1	5	2	2	2	2	1	4	3	2	8	5	9	1	49	0.000206716
		K859	0	0	0	0	3	2	6	6	7	5	3	6	3	2	3	46	0.00019406
		I693	2	2	1	2	2	2	6	0	3	3	6	3	5	6	2	45	0.000189841
		C260	0	1	4	2	1	0	6	5	2	4	2	7	3	5	3	45	0.000189841
		K703	4	2	5	1	3	1	4	1	2	1	5	5	3	2	5	44	0.000185623
		K566	3	3	0	2	3	3	0	4	3	3	3	4	4	7	2	44	0.000185623
		C159	3	1	2	1	5	3	0	4	4	6	3	5	3	0	3	43	0.000181404
		I509	1	1	1	3	1	2	0	1	0	6	3	3	6	6	9	43	0.000181404
		I050	2	3	5	6	3	5	3	2	1	3	2	2	2	3	0	42	0.000177185
		I713	1	4	3	2	2	4	2	2	4	3	2	3	4	3	3	42	0.000177185
		A46	1	2	2	5	2	1	3	3	3	0	4	6	3	4	3	42	0.000177185
		I698	6	2	0	1	3	4	2	4	1	2	3	6	3	3	1	41	0.000172967
		K819	6	3	3	1	4	3	3	4	1	4	3	1	2	3	0	41	0.000172967
		E43	2	2	5	2	2	2	4	1	1	2	1	1	4	7	5	41	0.000172967
		I119	0	1	0	2	1	0	2	1	1	6	5	5	6	8	3	41	0.000172967
		I351	3	5	1	3	3	4	2	3	1	3	2	1	3	1	5	40	0.000168748
		J42	6	2	4	5	2	5	3	2	3	1	0	1	3	2	0	39	0.000164529
		M069	3	5	3	2	2	3	3	1	1	3	3	0	6	3	1	39	0.000164529
		C710	1	1	2	5	4	2	4	3	2	4	3	3	1	4	0	39	0.000164529
		C20	1	3	2	2	4	3	0	3	2	1	1	4	6	4	3	39	0.000164529
		W010	1	1	3	0	3	1	1	3	1	2	2	3	11	4	3	39	0.000164529
		E878	6	1	3	2	0	4	5	1	4	2	1	3	3	2	1	38	0.00016031
		C679	1	5	1	2	2	4	4	4	0	6	2	0	4	2	0	37	0.000156092
		J90	1	4	2	0	3	3	3	2	5	3	5	2	2	1	1	37	0.000156092
		E139	0	0	0	3	0	5	6	6	7	2	1	2	2	0	2	36	0.000151873
		I743	0	1	4	3	5	0	2	2	2	2	2	0	3	6	3	35	0.000147654
		Y838	2	1	1	1	2	4	1	3	3	4	1	5	4	2	0	34	0.000143436
		I711	0	2	0	2	4	2	3	4	7	1	1	2	1	4	1	34	0.000143436
		C449	3	0	0	0	2	4	0	3	0	1	3	3	5	2	7	33	0.000139217
		I228	2	1	3	2	4	1	2	2	3	2	1	3	2	3	2	33	0.000139217
		C64	0	5	1	1	1	2	3	1	3	6	2	2	4	1	1	33	0.000139217
		K579	0	2	0	2	2	3	1	2	2	4	3	3	3	3	3	33	0.000139217
		K802	4	3	1	0	3	3	1	3	4	2	3	2	2	0	1	32	0.000134998
		E106	2	1	1	3	2	1	2	2	3	3	3	1	5	0	3	32	0.000134998
		B570	1	0	1	2	4	2	2	6	2	3	0	1	4	3	1	32	0.000134998
		I110	4	2	0	1	2	0	5	3	1	2	3	4	4	0	0	31	0.00013078
		I319	3	2	3	1	2	2	1	3	5	1	3	2	1	0	2	31	0.00013078
		I712	0	1	1	4	1	2	0	2	5	2	3	2	2	6	0	31	0.00013078
		F03	0	2	2	3	6	1	0	4	1	0	3	1	1	4	3	31	0.00013078
		M319	2	4	3	1	7	0	2	2	4	1	0	2	1	0	1	30	0.000126561
		K729	2	0	1	2	4	2	0	4	2	4	3	1	1	4	0	30	0.000126561
		C900	0	0	2	1	2	3	4	1	4	3	1	3	3	1	2	30	0.000126561
		A162	1	3	2	2	3	2	0	2	4	1	1	3	1	2	2	29	0.000122342
		C859	1	0	3	2	2	1	5	3	1	0	1	3	3	2	2	29	0.000122342
		I080	1	3	1	3	2	2	2	3	1	1	2	1	5	1	1	29	0.000122342
		E144	3	1	2	0	2	4	3	1	3	2	1	3	0	2	1	28	0.000118124
		C719	1	2	2	4	0	3	2	1	1	1	0	1	6	0	4	28	0.000118124
		B24	0	1	0	0	1	1	2	2	2	4	1	1	6	4	3	28	0.000118124
		I260	3	0	2	0	2	2	3	4	1	0	2	3	1	4	0	27	0.000113905
		I221	3	1	1	5	1	1	3	2	3	5	1	0	0	1	0	27	0.000113905
		J40	2	4	2	1	3	3	1	4	4	1	0	0	2	0	0	27	0.000113905
		K769	0	4	1	3	1	0	3	2	1	4	3	1	1	1	2	27	0.000113905
		J46	3	3	1	1	3	1	0	3	1	0	0	2	4	1	3	26	0.000109686
		I426	1	0	0	0	4	2	4	3	2	2	2	2	2	1	1	26	0.000109686
		Q210	0	6	3	1	1	0	3	2	1	1	0	2	1	4	1	26	0.000109686
		O994	0	2	1	2	1	0	3	2	4	1	3	3	2	1	1	26	0.000109686
		W190	7	3	1	0	1	0	2	1	0	0	2	2	3	3	0	25	0.000105467
		I674	1	1	4	2	3	2	2	0	1	1	2	4	1	1	0	25	0.000105467
		B573	1	3	2	1	1	2	1	1	1	1	1	4	2	2	2	25	0.000105467
		G301	1	0	1	1	0	0	0	4	1	1	1	2	1	3	9	25	0.000105467
		F172	4	1	1	2	1	5	2	2	1	2	1	0	0	1	1	24	0.000101249
		C73	0	1	0	1	1	1	1	3	2	1	1	5	2	4	1	24	0.000101249
		J989	1	1	1	0	1	1	1	3	4	1	1	0	4	1	3	23	9.703e-05
		D539	1	2	1	0	3	1	1	2	3	2	3	1	0	2	1	23	9.703e-05
		J961	0	2	2	0	1	1	2	4	2	0	1	2	4	1	1	23	9.703e-05
		D509	1	1	2	1	1	0	1	0	0	1	0	9	1	1	3	22	9.28113e-05
		A90	1	0	1	1	2	1	0	4	0	1	2	0	1	6	2	22	9.28113e-05
		N289	0	3	1	1	1	2	2	1	0	4	0	3	1	0	3	22	9.28113e-05
		N12	0	1	1	1	1	2	1	3	3	0	3	2	2	1	1	22	9.28113e-05
		Q909	0	0	0	3	1	2	2	0	4	2	3	3	1	1	0	22	9.28113e-05
		K85	4	9	8	0	0	0	0	0	0	0	0	0	0	0	0	21	8.85926e-05
		D689	2	2	0	1	1	2	0	2	2	3	1	1	1	0	3	21	8.85926e-05
		I771	1	1	1	0	1	2	3	5	2	0	1	2	1	0	1	21	8.85926e-05
		I679	1	3	1	1	1	2	1	1	1	3	2	0	1	1	2	21	8.85926e-05
		J985	1	3	4	4	4	0	0	0	1	0	2	1	0	0	1	21	8.85926e-05
		I671	1	2	2	2	1	2	1	1	1	2	3	1	1	0	1	21	8.85926e-05
		K570	1	0	5	1	1	0	0	1	1	2	0	1	4	3	1	21	8.85926e-05
		I208	3	2	3	0	0	3	0	2	1	1	0	1	1	2	1	20	8.43739e-05
		I358	1	2	1	0	0	1	2	1	0	4	3	1	2	1	1	20	8.43739e-05
		E138	1	0	2	1	1	1	2	1	0	2	3	1	4	1	0	20	8.43739e-05
		E784	0	0	0	1	0	0	1	1	0	2	2	7	3	1	2	20	8.43739e-05
		I359	3	1	2	1	3	0	0	0	2	0	1	2	0	2	2	19	8.01552e-05
		G35	2	1	2	0	1	1	1	0	4	1	0	1	2	3	0	19	8.01552e-05
		K830	1	1	2	2	0	1	0	1	1	0	2	2	1	4	1	19	8.01552e-05
		G931	0	4	2	0	0	5	1	1	0	1	2	0	1	1	1	19	8.01552e-05
		J188	0	0	0	2	1	3	0	2	3	2	2	1	2	1	0	19	8.01552e-05
		E162	1	1	0	0	1	3	0	3	0	1	1	2	2	1	2	18	7.59366e-05
		C920	0	0	1	1	2	0	0	1	0	3	4	1	2	1	2	18	7.59366e-05
		K850	0	0	0	1	1	2	1	1	2	0	1	3	1	3	2	18	7.59366e-05
		C762	3	2	0	2	3	2	0	1	0	1	1	1	1	0	0	17	7.17179e-05
		I424	2	0	0	1	1	1	2	1	2	1	0	1	4	1	0	17	7.17179e-05
		X599	1	2	3	1	0	2	1	1	0	3	0	1	1	0	1	17	7.17179e-05
		M199	1	1	2	0	1	2	0	2	1	2	2	0	2	0	1	17	7.17179e-05
		I058	1	1	0	0	0	0	0	0	0	1	1	3	4	2	4	17	7.17179e-05
		J158	1	2	0	0	0	0	0	1	0	1	2	1	4	3	2	17	7.17179e-05
		E126	0	0	0	1	2	1	2	2	1	0	1	1	3	3	0	17	7.17179e-05
		J22	2	1	0	1	1	2	2	1	0	0	1	2	1	1	1	16	6.74992e-05
		E114	1	0	1	0	0	0	2	3	0	1	1	2	4	1	0	16	6.74992e-05
		J181	1	3	1	0	0	5	1	0	0	0	0	1	0	2	2	16	6.74992e-05
		G311	1	1	0	0	1	1	0	2	2	0	0	1	2	4	1	16	6.74992e-05
		D571	0	1	0	3	0	0	1	1	1	0	1	4	2	2	0	16	6.74992e-05
		I089	0	3	0	0	1	0	4	1	0	0	0	2	1	1	3	16	6.74992e-05
		I200	0	1	2	1	0	1	1	2	4	1	0	0	0	2	1	16	6.74992e-05
		C541	0	1	1	0	0	2	2	0	1	2	1	3	2	1	0	16	6.74992e-05
		G122	0	1	0	4	0	0	2	1	2	2	0	0	2	0	2	16	6.74992e-05
		R092	0	0	0	0	2	2	1	3	2	0	0	0	5	0	1	16	6.74992e-05
		M349	0	0	0	0	1	2	1	0	3	0	0	1	1	5	2	16	6.74992e-05
		C760	3	1	0	1	0	1	2	0	0	0	1	0	3	2	1	15	6.32805e-05
		I099	1	1	0	1	0	0	3	0	3	2	0	1	1	1	1	15	6.32805e-05
		I872	0	3	0	0	0	0	1	1	1	1	2	2	0	1	3	15	6.32805e-05
		F109	0	1	1	2	2	0	0	1	0	1	0	1	2	2	2	15	6.32805e-05
		C959	0	1	0	0	0	0	2	0	1	0	0	5	1	2	3	15	6.32805e-05
		N180	4	0	0	1	0	0	1	2	0	2	0	2	2	0	0	14	5.90618e-05
		I803	2	0	1	1	0	2	2	1	0	0	2	0	2	1	0	14	5.90618e-05
		C250	2	0	0	0	0	0	1	1	0	0	3	3	0	3	1	14	5.90618e-05
		C069	1	2	2	1	0	1	0	0	1	1	1	1	2	1	0	14	5.90618e-05
		K297	1	0	1	1	0	1	0	1	0	2	3	1	1	0	2	14	5.90618e-05
		Q248	1	0	1	3	1	3	0	1	0	2	1	1	0	0	0	14	5.90618e-05
		K578	1	1	2	0	1	2	0	1	1	2	0	2	0	1	0	14	5.90618e-05
		D469	1	1	0	1	2	0	3	0	2	1	0	0	2	0	1	14	5.90618e-05
		C19	1	1	2	0	1	0	1	0	1	2	1	2	1	1	0	14	5.90618e-05
		K659	0	2	1	0	1	2	3	1	1	1	0	1	0	1	0	14	5.90618e-05
		B182	0	1	1	0	2	0	1	0	0	1	1	2	2	1	2	14	5.90618e-05
		E781	0	0	1	1	1	0	1	1	3	4	0	0	1	1	0	14	5.90618e-05
		I500	0	1	0	2	2	2	1	0	2	1	0	0	0	1	2	14	5.90618e-05
		Y836	0	2	1	2	0	2	2	1	2	0	0	1	0	1	0	14	5.90618e-05
		N10	0	1	2	0	2	1	0	1	1	0	2	0	1	1	2	14	5.90618e-05
		C780	2	1	0	0	2	0	1	3	1	0	1	0	0	1	1	13	5.48431e-05
		M819	2	0	1	0	1	2	3	2	0	1	0	1	0	0	0	13	5.48431e-05
		K760	1	0	2	0	1	1	1	0	2	0	0	1	0	4	0	13	5.48431e-05
		D619	0	1	2	2	0	0	2	2	0	1	0	0	2	0	1	13	5.48431e-05
		I744	0	2	0	1	0	2	0	2	0	0	1	2	1	1	1	13	5.48431e-05
		A418	0	0	1	0	1	0	0	1	0	2	0	1	3	4	0	13	5.48431e-05
		L089	0	0	0	1	0	0	1	0	0	0	4	2	2	1	2	13	5.48431e-05
		C23	2	0	1	1	1	0	0	0	1	1	0	1	2	1	1	12	5.06244e-05
		I201	1	0	1	0	0	2	0	1	1	2	1	1	1	1	0	12	5.06244e-05
		O96	1	0	0	0	0	1	1	1	0	3	1	0	0	3	1	12	5.06244e-05
		I271	1	1	1	2	2	0	0	2	1	0	1	0	1	0	0	12	5.06244e-05
		E113	1	0	0	0	0	1	0	0	0	0	0	4	1	1	4	12	5.06244e-05
		J47	1	0	3	1	0	1	2	2	0	1	0	0	0	0	1	12	5.06244e-05
		K800	1	0	1	0	0	4	1	1	2	1	1	0	0	0	0	12	5.06244e-05
		I00	1	0	1	2	2	0	1	0	1	1	3	0	0	0	0	12	5.06244e-05
		Y832	0	1	0	1	2	3	0	1	1	1	0	2	0	0	0	12	5.06244e-05
		J980	0	2	1	0	0	0	1	3	0	2	0	2	0	1	0	12	5.06244e-05
		I083	0	0	0	1	0	1	0	0	1	0	0	0	4	4	1	12	5.06244e-05
		I051	0	0	2	0	0	2	0	0	1	0	2	2	0	3	0	12	5.06244e-05
		I709	0	0	0	0	0	0	0	0	1	2	3	1	4	1	0	12	5.06244e-05
		I313	0	1	0	0	0	1	1	0	2	1	2	1	1	1	1	12	5.06244e-05
		C240	0	0	0	0	1	2	0	4	1	2	0	0	1	0	1	12	5.06244e-05
		E872	0	0	0	0	0	0	3	1	0	1	2	0	1	2	2	12	5.06244e-05
		I272	0	0	0	0	0	1	1	0	1	1	1	0	3	1	3	12	5.06244e-05
		C500	4	0	0	1	0	0	1	2	0	1	1	0	0	1	0	11	4.64057e-05
		K704	1	2	1	0	0	0	0	1	1	1	1	2	0	1	0	11	4.64057e-05
		I019	1	0	0	0	0	0	1	2	1	0	1	3	1	0	1	11	4.64057e-05
		I349	1	0	2	0	0	0	2	0	2	1	1	0	0	1	1	11	4.64057e-05
		J849	1	0	0	0	0	0	2	0	0	1	1	2	1	1	2	11	4.64057e-05
		L89	0	0	0	0	1	1	0	0	0	2	0	2	3	2	0	11	4.64057e-05
		K529	0	1	0	1	2	0	0	0	1	1	0	1	1	3	0	11	4.64057e-05
		I638	0	0	0	0	0	0	0	0	0	0	0	1	3	5	2	11	4.64057e-05
		K460	0	0	0	1	0	0	0	1	1	1	1	0	0	4	2	11	4.64057e-05
		C439	0	0	0	0	0	1	1	2	1	2	1	2	0	0	1	11	4.64057e-05
		E888	0	0	0	0	1	0	0	0	0	2	0	2	4	1	1	11	4.64057e-05
		O100	3	1	0	1	1	0	0	1	0	0	1	1	1	0	0	10	4.2187e-05
		C220	1	0	0	0	0	2	1	0	1	2	1	1	0	0	1	10	4.2187e-05
		E136	1	0	1	0	0	0	0	0	0	0	0	4	4	0	0	10	4.2187e-05
		I425	1	1	0	1	1	0	0	1	1	2	0	0	1	0	1	10	4.2187e-05
		K805	1	1	1	0	1	4	1	0	0	0	0	0	0	1	0	10	4.2187e-05
		G319	1	0	0	1	0	0	0	0	0	0	1	2	2	1	2	10	4.2187e-05
		C329	0	1	0	1	0	1	0	1	1	0	0	1	1	2	1	10	4.2187e-05
		M318	0	0	1	2	1	2	1	0	0	3	0	0	0	0	0	10	4.2187e-05
		I778	0	0	0	1	1	1	3	2	0	0	0	1	1	0	0	10	4.2187e-05
		C029	0	0	0	0	0	0	0	2	0	0	0	4	0	2	2	10	4.2187e-05
		C419	0	0	1	0	0	4	1	0	0	1	1	1	1	0	0	10	4.2187e-05
		I715	0	2	0	0	0	0	0	1	1	3	1	0	1	0	1	10	4.2187e-05
		C170	0	1	2	3	0	0	1	2	0	0	0	0	0	1	0	10	4.2187e-05
		J681	0	0	0	0	2	1	0	2	1	2	1	0	0	1	0	10	4.2187e-05
		A91	0	0	2	0	1	1	0	0	2	2	1	0	0	0	1	10	4.2187e-05
		I519	0	0	0	0	1	0	0	1	0	2	0	1	3	0	2	10	4.2187e-05
		C508	0	0	0	0	0	0	1	0	0	1	0	5	1	1	1	10	4.2187e-05
		J80	2	0	0	0	1	0	0	1	0	0	1	1	0	1	2	9	3.79683e-05
		J969	2	0	0	1	0	0	0	1	1	0	0	0	1	3	0	9	3.79683e-05
		F322	2	0	0	0	1	0	2	0	0	1	0	0	3	0	0	9	3.79683e-05
		C787	2	0	0	1	1	0	1	0	0	0	0	1	1	1	1	9	3.79683e-05
		I950	1	0	0	0	1	1	2	0	0	1	0	1	1	1	0	9	3.79683e-05
		I330	1	1	0	1	0	1	0	1	1	1	0	0	0	1	1	9	3.79683e-05
		N188	1	0	0	0	0	0	1	0	0	0	1	2	1	2	1	9	3.79683e-05
		N170	1	0	1	0	1	0	1	2	0	1	1	0	0	0	1	9	3.79683e-05
		G919	1	0	0	1	1	0	0	1	1	1	1	1	0	0	1	9	3.79683e-05
		W849	1	0	0	1	0	0	0	0	1	1	2	1	1	1	0	9	3.79683e-05
		B208	1	1	0	0	1	0	2	1	0	0	0	1	1	1	0	9	3.79683e-05
		I510	1	0	0	0	0	0	1	1	2	0	0	0	0	3	1	9	3.79683e-05
		K808	1	0	0	1	0	0	0	0	0	0	1	1	2	2	1	9	3.79683e-05
		C798	0	1	2	1	0	1	1	1	0	1	0	0	1	0	0	9	3.79683e-05
		E786	0	0	0	1	0	2	1	1	1	1	1	0	1	0	0	9	3.79683e-05
		C911	0	0	1	0	0	2	1	0	0	1	1	0	1	2	0	9	3.79683e-05
		A309	0	2	0	0	0	1	0	1	0	0	1	1	1	0	2	9	3.79683e-05
		K251	0	1	1	0	0	2	1	0	0	0	1	1	0	1	1	9	3.79683e-05
		C179	0	1	0	0	1	0	0	1	0	2	2	0	1	1	0	9	3.79683e-05
		Q208	0	0	0	1	1	2	0	1	1	2	0	0	1	0	0	9	3.79683e-05
		E870	0	0	0	0	0	1	1	0	2	0	0	1	2	2	0	9	3.79683e-05
		I632	0	0	0	0	0	1	0	0	0	1	0	0	0	3	4	9	3.79683e-05
		K851	0	0	0	0	0	0	0	1	3	1	1	1	0	2	0	9	3.79683e-05
		I749	2	0	0	0	1	0	1	0	2	1	0	0	1	0	0	8	3.37496e-05
		K804	2	1	0	0	0	2	0	1	0	0	1	0	1	0	0	8	3.37496e-05
		K562	1	0	0	1	1	0	0	0	0	1	0	1	2	1	0	8	3.37496e-05
		K254	1	0	1	1	0	0	0	1	0	0	1	1	0	2	0	8	3.37496e-05
		I339	1	0	0	0	1	0	0	2	0	0	1	1	1	0	1	8	3.37496e-05
		F329	1	0	0	0	2	0	0	0	0	2	2	0	0	0	1	8	3.37496e-05
		J450	1	1	2	0	1	1	0	1	0	0	1	0	0	0	0	8	3.37496e-05
		A150	1	0	1	0	0	0	0	0	0	1	1	0	2	0	2	8	3.37496e-05
		K750	0	2	0	0	1	0	0	2	0	1	0	1	0	1	0	8	3.37496e-05
		E756	0	0	1	1	0	0	0	0	1	1	2	0	2	0	0	8	3.37496e-05
		E440	0	1	0	0	0	0	0	0	1	0	0	1	3	0	2	8	3.37496e-05
		E143	0	1	1	2	1	0	0	0	2	0	0	0	0	0	1	8	3.37496e-05
		K801	0	1	1	0	1	0	0	0	1	0	1	2	0	0	1	8	3.37496e-05
		E049	0	1	1	0	1	1	1	1	0	0	0	0	1	1	0	8	3.37496e-05
		C763	0	1	0	0	0	1	1	0	0	0	3	0	1	1	0	8	3.37496e-05
		I81	0	1	1	0	0	0	1	0	0	0	1	0	1	1	2	8	3.37496e-05
		K929	0	0	0	0	0	0	1	0	0	1	3	0	1	1	1	8	3.37496e-05
		F192	0	0	0	0	0	1	0	1	2	1	0	1	0	1	1	8	3.37496e-05
		D683	0	0	0	0	0	1	0	1	1	0	1	0	2	1	1	8	3.37496e-05
		K250	0	0	0	0	0	0	0	1	0	0	2	2	1	2	0	8	3.37496e-05
		J869	3	1	1	1	1	0	0	0	0	0	0	0	0	0	0	7	2.95309e-05
		I839	2	0	0	1	1	1	0	0	0	0	1	1	0	0	0	7	2.95309e-05
		B575	1	2	1	0	0	0	0	1	1	0	0	1	0	0	0	7	2.95309e-05
		K409	1	0	1	0	1	0	1	2	0	0	0	0	0	1	0	7	2.95309e-05
		J111	1	0	1	0	0	0	0	0	0	3	0	0	1	1	0	7	2.95309e-05
		J069	1	0	0	0	1	0	0	1	0	0	1	2	0	0	1	7	2.95309e-05
		C788	1	1	0	0	1	0	1	0	0	0	1	0	0	2	0	7	2.95309e-05
		W870	1	0	1	0	1	0	0	1	0	1	1	0	0	1	0	7	2.95309e-05
		C519	1	0	0	0	0	0	0	1	1	1	1	0	1	0	1	7	2.95309e-05
		E778	1	0	1	0	0	4	0	0	0	0	1	0	0	0	0	7	2.95309e-05
		C187	0	0	1	0	1	1	2	1	0	0	0	0	0	1	0	7	2.95309e-05
		K469	0	0	2	0	2	0	0	0	1	0	1	0	1	0	0	7	2.95309e-05
		K279	0	0	1	0	0	0	1	0	1	0	0	0	0	3	1	7	2.95309e-05
		I691	0	0	1	2	0	0	0	1	1	1	0	0	1	0	0	7	2.95309e-05
		I409	0	2	0	1	0	1	0	0	0	0	0	2	0	0	1	7	2.95309e-05
		E129	0	0	0	0	0	1	0	0	3	0	0	1	1	1	0	7	2.95309e-05
		I241	0	0	0	0	0	0	0	1	0	1	0	0	0	2	3	7	2.95309e-05
		I741	0	2	0	0	1	2	1	0	0	0	0	1	0	0	0	7	2.95309e-05
		I278	0	2	0	1	0	0	1	0	0	2	0	1	0	0	0	7	2.95309e-05
		C786	0	2	0	0	0	0	2	0	1	0	1	1	0	0	0	7	2.95309e-05
		C921	0	1	1	2	0	1	0	0	1	0	0	0	0	0	1	7	2.95309e-05
		I052	0	1	1	0	1	1	1	1	0	0	0	1	0	0	0	7	2.95309e-05
		A049	0	1	0	0	1	1	0	1	0	0	0	1	0	1	1	7	2.95309e-05
		C549	0	1	0	0	0	0	1	1	1	2	0	0	0	1	0	7	2.95309e-05
		E079	0	1	1	1	1	0	0	0	1	0	0	2	0	0	0	7	2.95309e-05
		G459	0	1	0	0	2	1	0	0	1	0	1	0	0	1	0	7	2.95309e-05
		G939	0	0	2	1	0	2	0	0	0	1	0	0	0	1	0	7	2.95309e-05
		I716	0	0	1	0	1	0	0	1	0	0	0	1	2	1	0	7	2.95309e-05
		K573	0	0	1	0	0	1	0	1	1	1	0	1	1	0	0	7	2.95309e-05
		C538	0	0	0	1	0	0	2	0	0	1	2	0	0	1	0	7	2.95309e-05
		I071	0	0	0	0	0	0	0	0	1	1	0	1	1	3	0	7	2.95309e-05
		I081	0	0	0	0	0	1	1	0	1	0	0	3	0	0	1	7	2.95309e-05
		I499	0	0	0	0	0	1	0	0	1	1	2	0	1	0	1	7	2.95309e-05
		M809	0	0	0	0	0	0	0	0	0	4	2	0	0	0	1	7	2.95309e-05
		N038	0	0	0	0	0	1	0	0	0	0	1	1	1	1	2	7	2.95309e-05
		E103	0	0	0	0	0	0	2	1	0	1	1	0	2	0	0	7	2.95309e-05
		Q253	2	0	0	0	1	0	0	0	1	0	0	0	0	1	1	6	2.53122e-05
		C579	2	1	0	1	0	0	1	1	0	0	0	0	0	0	0	6	2.53122e-05
		B909	1	0	1	3	0	0	1	0	0	0	0	0	0	0	0	6	2.53122e-05
		K565	1	0	0	0	0	1	0	1	0	0	1	0	0	1	1	6	2.53122e-05
		W060	1	0	0	0	0	0	2	0	0	1	0	0	0	1	1	6	2.53122e-05
		I341	1	0	1	1	0	0	2	0	0	0	0	0	0	1	0	6	2.53122e-05
		I724	1	0	0	0	0	1	1	0	0	0	1	0	0	2	0	6	2.53122e-05
		I513	1	0	1	1	1	0	1	1	0	0	0	0	0	0	0	6	2.53122e-05
		D696	1	0	0	0	0	0	0	0	0	2	2	0	0	0	1	6	2.53122e-05
		F100	0	1	1	0	0	1	0	0	0	0	1	0	1	1	0	6	2.53122e-05
		K403	0	0	0	0	0	0	1	1	0	1	1	0	0	0	2	6	2.53122e-05
		K259	0	0	1	0	0	0	0	1	1	1	1	0	0	0	1	6	2.53122e-05
		C140	0	0	0	1	1	0	1	0	0	0	0	1	0	0	2	6	2.53122e-05
		N309	0	0	0	0	0	1	1	1	1	2	0	0	0	0	0	6	2.53122e-05
		K319	0	0	1	0	1	1	0	0	2	0	1	0	0	0	0	6	2.53122e-05
		N26	0	1	0	0	0	1	0	1	0	0	0	0	1	0	2	6	2.53122e-05
		N399	0	1	0	0	0	0	0	0	0	2	0	0	1	2	0	6	2.53122e-05
		Y834	0	1	0	1	1	0	1	0	0	0	1	1	0	0	0	6	2.53122e-05
		C249	0	1	0	0	0	1	0	0	1	0	1	0	2	0	0	6	2.53122e-05
		I830	0	1	0	0	1	0	1	0	1	0	1	0	1	0	0	6	2.53122e-05
		L930	0	1	1	0	1	0	1	0	1	0	0	0	1	0	0	6	2.53122e-05
		M844	0	1	0	0	0	1	0	1	1	1	0	0	1	0	0	6	2.53122e-05
		D259	0	1	1	0	0	1	1	0	0	0	0	0	1	0	1	6	2.53122e-05
		C348	0	0	0	0	0	0	0	0	0	0	0	3	1	1	1	6	2.53122e-05
		J129	0	0	0	1	0	0	0	0	1	0	0	0	0	1	3	6	2.53122e-05
		I517	0	0	0	2	0	0	1	1	0	0	0	0	0	1	1	6	2.53122e-05
		H830	0	0	0	2	0	0	0	0	1	1	0	0	1	1	0	6	2.53122e-05
		E137	0	0	0	1	0	0	0	0	1	0	1	0	1	2	0	6	2.53122e-05
		J110	0	0	0	0	1	0	0	1	0	0	0	1	1	1	1	6	2.53122e-05
		E709	0	0	0	0	1	0	0	3	1	1	0	0	0	0	0	6	2.53122e-05
		B948	0	0	0	0	0	0	1	1	0	0	1	0	1	2	0	6	2.53122e-05
		C180	0	0	0	0	0	1	0	0	1	1	0	2	1	0	0	6	2.53122e-05
		I742	0	0	0	0	0	0	1	0	0	1	0	1	1	1	1	6	2.53122e-05
		A920	0	0	0	0	0	0	0	0	0	0	2	3	0	1	0	6	2.53122e-05
		E050	2	0	0	0	0	0	0	1	0	2	0	0	0	0	0	5	2.10935e-05
		E131	2	0	0	0	0	0	0	1	1	1	0	0	0	0	0	5	2.10935e-05
		D65	2	0	0	0	1	0	0	0	0	0	1	1	0	0	0	5	2.10935e-05
		K290	1	0	0	0	0	0	0	0	1	2	0	0	0	1	0	5	2.10935e-05
		N288	1	0	0	0	1	0	0	0	1	0	0	1	0	1	0	5	2.10935e-05
		M139	1	0	2	0	1	0	0	0	0	0	0	1	0	0	0	5	2.10935e-05
		B029	1	0	0	1	0	0	0	0	1	0	0	0	2	0	0	5	2.10935e-05
		D329	1	0	0	0	0	0	1	0	0	1	0	0	0	2	0	5	2.10935e-05
		I748	1	1	0	0	0	0	1	0	0	0	1	0	0	0	1	5	2.10935e-05
		J709	1	0	0	1	0	0	0	0	0	0	2	0	1	0	0	5	2.10935e-05
		A085	1	0	0	1	0	1	0	0	0	0	0	1	0	1	0	5	2.10935e-05
		F209	1	1	1	0	0	1	0	0	0	1	0	0	0	0	0	5	2.10935e-05
		E875	1	0	0	1	0	0	0	0	0	1	1	0	0	1	0	5	2.10935e-05
		M311	1	0	0	0	0	0	1	0	0	0	0	0	0	2	1	5	2.10935e-05
		Y199	1	1	0	0	0	0	0	0	0	0	1	1	0	0	1	5	2.10935e-05
		B349	1	0	0	0	1	0	0	0	0	1	1	0	0	0	1	5	2.10935e-05
		C269	0	0	0	0	0	1	0	1	0	3	0	0	0	0	0	5	2.10935e-05
		K767	0	0	0	1	0	0	0	1	0	1	0	1	0	0	1	5	2.10935e-05
		I832	0	0	0	0	0	2	0	0	0	1	1	1	0	0	0	5	2.10935e-05
		B200	0	0	0	0	0	1	1	0	0	1	1	0	0	1	0	5	2.10935e-05
		K559	0	0	0	0	1	0	1	0	1	0	0	1	0	1	0	5	2.10935e-05
		I618	0	0	0	0	0	0	0	1	0	0	1	2	0	0	1	5	2.10935e-05
		I850	0	1	1	1	1	0	0	0	1	0	0	0	0	0	0	5	2.10935e-05
		K803	0	0	0	0	0	0	1	0	0	1	0	0	0	1	2	5	2.10935e-05
		Y839	0	2	0	0	0	1	0	0	0	0	0	0	2	0	0	5	2.10935e-05
		V021	0	2	0	1	0	1	0	0	0	0	0	0	0	1	0	5	2.10935e-05
		D759	0	2	0	0	0	0	0	2	0	0	0	0	0	1	0	5	2.10935e-05
		C951	0	1	0	1	0	1	0	0	0	2	0	0	0	0	0	5	2.10935e-05
		F99	0	1	1	0	0	0	0	1	0	0	1	0	0	0	1	5	2.10935e-05
		G809	0	1	0	0	0	0	0	0	0	1	0	0	0	2	1	5	2.10935e-05
		F430	0	1	0	0	0	0	0	1	0	0	0	2	0	0	1	5	2.10935e-05
		W100	0	1	0	0	1	1	0	0	0	0	0	1	1	0	0	5	2.10935e-05
		C570	0	1	0	1	0	0	0	1	1	1	0	0	0	0	0	5	2.10935e-05
		K829	0	1	0	2	0	1	0	0	0	1	0	0	0	0	0	5	2.10935e-05
		I352	0	0	0	0	0	0	0	1	0	0	1	0	1	0	2	5	2.10935e-05
		J840	0	0	0	0	0	1	0	0	0	1	0	0	1	0	2	5	2.10935e-05
		V892	0	0	0	2	0	0	0	0	1	0	1	0	0	0	1	5	2.10935e-05
		G419	0	0	0	0	2	0	1	0	0	0	1	0	0	1	0	5	2.10935e-05
		F019	0	0	1	0	0	0	1	0	3	0	0	0	0	0	0	5	2.10935e-05
		I878	0	0	0	1	0	2	0	0	1	0	0	1	0	0	0	5	2.10935e-05
		I060	0	0	0	1	0	1	1	1	0	0	0	0	1	0	0	5	2.10935e-05
		I958	0	0	0	1	0	1	1	0	1	0	1	0	0	0	0	5	2.10935e-05
		I288	0	0	0	1	1	0	0	1	0	0	0	0	1	1	0	5	2.10935e-05
		K296	0	0	0	1	1	0	1	1	0	0	0	1	0	0	0	5	2.10935e-05
		Y831	0	0	0	1	0	0	0	0	1	1	1	0	1	0	0	5	2.10935e-05
		J150	0	0	0	1	0	0	2	1	1	0	0	0	0	0	0	5	2.10935e-05
		E876	0	0	0	1	0	0	0	0	0	1	0	3	0	0	0	5	2.10935e-05
		I728	0	0	0	1	0	0	0	0	0	0	0	2	2	0	0	5	2.10935e-05
		C060	0	0	0	0	1	0	0	0	0	0	0	2	0	1	1	5	2.10935e-05
		D600	0	0	0	0	1	1	2	0	0	0	0	1	0	0	0	5	2.10935e-05
		J438	0	0	0	0	0	1	1	0	1	1	0	1	0	0	0	5	2.10935e-05
		I828	0	0	0	0	0	0	1	0	1	1	1	0	0	0	1	5	2.10935e-05
		J09	0	0	0	0	0	0	0	1	0	0	1	0	0	3	0	5	2.10935e-05
		X590	0	0	0	0	0	0	0	1	2	0	1	0	0	1	0	5	2.10935e-05
		A310	0	0	0	0	0	0	0	0	0	0	2	1	0	1	1	5	2.10935e-05
		G300	0	0	0	0	0	0	0	1	0	0	1	1	0	1	1	5	2.10935e-05
		I090	0	0	0	0	0	0	0	0	3	0	0	2	0	0	0	5	2.10935e-05
		G936	2	0	0	0	0	0	0	0	0	0	0	0	0	1	1	4	1.68748e-05
		B99	1	0	0	0	0	0	1	0	0	0	1	0	0	0	1	4	1.68748e-05
		K274	1	0	0	0	0	0	1	1	0	1	0	0	0	0	0	4	1.68748e-05
		D45	1	1	0	0	0	0	1	0	0	0	1	0	0	0	0	4	1.68748e-05
		K650	1	0	1	0	0	0	1	0	0	0	0	0	0	1	0	4	1.68748e-05
		K766	1	0	0	0	0	0	0	1	0	0	0	0	0	1	1	4	1.68748e-05
		L97	1	0	1	0	0	0	0	0	0	0	0	0	0	1	1	4	1.68748e-05
		K818	1	0	0	1	0	0	0	0	2	0	0	0	0	0	0	4	1.68748e-05
		B159	1	1	0	0	0	0	0	1	0	0	1	0	0	0	0	4	1.68748e-05
		G909	1	0	0	0	0	2	0	0	0	0	0	0	0	1	0	4	1.68748e-05
		M059	1	0	0	0	0	0	1	1	1	0	0	0	0	0	0	4	1.68748e-05
		M053	1	1	0	0	0	0	0	0	0	0	1	0	0	0	1	4	1.68748e-05
		I831	1	0	0	0	1	0	1	1	0	0	0	0	0	0	0	4	1.68748e-05
		K359	0	0	0	0	1	0	0	1	1	0	0	0	0	1	0	4	1.68748e-05
		K639	0	0	0	0	0	0	1	0	1	0	0	0	1	1	0	4	1.68748e-05
		E880	0	0	0	0	0	0	1	0	0	0	1	0	1	1	0	4	1.68748e-05
		K509	0	0	0	0	0	0	1	0	0	0	1	0	2	0	0	4	1.68748e-05
		I634	0	0	1	1	0	0	0	0	1	0	0	0	0	1	0	4	1.68748e-05
		I289	0	0	1	0	0	1	0	0	1	0	0	1	0	0	0	4	1.68748e-05
		K700	0	0	0	0	1	0	0	0	2	0	0	0	0	1	0	4	1.68748e-05
		N200	0	0	0	0	0	0	2	0	0	1	0	0	0	1	0	4	1.68748e-05
		B550	0	1	0	0	0	0	1	0	1	1	0	0	0	0	0	4	1.68748e-05
		B574	0	1	0	1	0	0	0	1	0	0	0	1	0	0	0	4	1.68748e-05
		D648	0	0	0	0	1	0	0	2	0	1	0	0	0	0	0	4	1.68748e-05
		J182	0	0	0	0	0	0	0	0	1	0	1	0	0	2	0	4	1.68748e-05
		B171	0	1	1	0	0	0	0	0	0	1	0	1	0	0	0	4	1.68748e-05
		E232	0	2	0	0	0	0	1	0	0	0	0	0	1	0	0	4	1.68748e-05
		E835	0	2	0	0	0	0	1	0	0	0	0	1	0	0	0	4	1.68748e-05
		C482	0	1	0	1	0	0	0	1	0	0	0	0	1	0	0	4	1.68748e-05
		K461	0	1	0	0	0	1	0	0	0	1	0	0	0	1	0	4	1.68748e-05
		C499	0	1	0	0	0	0	0	1	1	0	0	0	0	0	1	4	1.68748e-05
		K299	0	1	1	0	0	0	0	0	1	0	0	0	0	1	0	4	1.68748e-05
		I062	0	1	0	0	0	0	0	0	0	0	0	0	1	1	1	4	1.68748e-05
		K255	0	1	0	1	0	0	0	1	0	0	0	0	0	0	1	4	1.68748e-05
		I309	0	1	0	1	0	1	1	0	0	0	0	0	0	0	0	4	1.68748e-05
		I342	0	1	0	0	0	0	1	0	0	0	0	0	0	1	1	4	1.68748e-05
		F101	0	0	1	0	1	0	0	0	0	1	0	0	1	0	0	4	1.68748e-05
		V093	0	0	1	1	0	0	0	1	0	0	0	1	0	0	0	4	1.68748e-05
		M869	0	0	0	0	0	0	1	1	1	0	0	0	0	1	0	4	1.68748e-05
		K30	0	0	0	0	0	0	1	1	1	1	0	0	0	0	0	4	1.68748e-05
		N178	0	0	0	0	0	0	0	0	1	0	0	0	1	1	1	4	1.68748e-05
		K709	0	0	1	0	0	1	0	0	0	1	0	1	0	0	0	4	1.68748e-05
		X429	0	0	0	0	1	0	0	0	0	0	1	0	0	1	1	4	1.68748e-05
		C148	0	0	0	0	2	0	0	1	0	0	1	0	0	0	0	4	1.68748e-05
		K449	0	0	0	1	0	0	0	0	1	0	1	1	0	0	0	4	1.68748e-05
		E725	0	0	0	1	1	0	1	0	0	0	0	0	0	0	1	4	1.68748e-05
		J942	0	0	0	1	1	0	0	0	0	0	1	0	1	0	0	4	1.68748e-05
		C729	0	0	0	1	0	0	0	1	0	2	0	0	0	0	0	4	1.68748e-05
		N281	0	0	0	1	0	0	1	0	1	1	0	0	0	0	0	4	1.68748e-05
		I092	0	0	0	0	0	0	1	0	0	2	0	0	1	0	0	4	1.68748e-05
		A499	0	0	0	0	0	0	0	0	1	1	0	0	0	2	0	4	1.68748e-05
		A153	0	0	0	0	0	0	0	0	0	0	2	0	1	1	0	4	1.68748e-05
		K350	0	0	0	0	1	0	0	1	1	0	0	1	0	0	0	4	1.68748e-05
		K420	0	0	0	0	1	0	1	0	0	0	0	0	1	1	0	4	1.68748e-05
		E161	0	0	0	0	0	1	0	0	1	0	1	0	0	0	1	4	1.68748e-05
		A409	0	0	0	0	0	0	0	1	2	0	1	0	0	0	0	4	1.68748e-05
		I088	0	0	0	0	0	0	0	0	0	0	0	1	2	1	0	4	1.68748e-05
		E055	0	0	0	0	1	1	0	0	0	0	0	1	0	0	1	4	1.68748e-05
		M623	0	0	0	0	0	0	0	0	0	0	2	0	0	2	0	4	1.68748e-05
		K858	0	0	0	0	0	1	0	0	0	0	2	0	0	0	1	4	1.68748e-05
		K811	0	0	0	0	0	1	1	0	0	0	0	1	1	0	0	4	1.68748e-05
		O141	0	0	0	0	0	1	0	0	0	1	1	0	0	0	1	4	1.68748e-05
		Q219	0	0	0	0	0	0	2	0	1	0	0	0	0	0	1	4	1.68748e-05
		R960	0	0	0	0	0	0	0	0	0	0	0	1	0	2	1	4	1.68748e-05
		E441	0	0	0	0	0	0	0	0	0	0	0	1	2	0	1	4	1.68748e-05
		K275	2	0	0	0	0	0	0	0	0	0	0	0	1	0	0	3	1.26561e-05
		D320	2	0	0	0	0	0	0	0	0	0	0	1	0	0	0	3	1.26561e-05
		E874	1	0	0	0	0	0	0	1	0	0	1	0	0	0	0	3	1.26561e-05
		J219	1	0	0	0	0	1	0	0	1	0	0	0	0	0	0	3	1.26561e-05
		C443	1	0	0	0	1	0	0	0	0	0	0	0	1	0	0	3	1.26561e-05
		I629	1	0	0	0	0	1	0	1	0	0	0	0	0	0	0	3	1.26561e-05
		K551	1	0	1	0	0	0	0	0	0	0	0	1	0	0	0	3	1.26561e-05
		O149	1	0	0	0	0	0	1	1	0	0	0	0	0	0	0	3	1.26561e-05
		O101	1	0	1	0	1	0	0	0	0	0	0	0	0	0	0	3	1.26561e-05
		O159	1	0	0	0	1	0	0	0	0	0	0	0	1	0	0	3	1.26561e-05
		I859	1	0	0	0	0	0	0	1	0	0	0	0	0	0	1	3	1.26561e-05
		H669	1	0	1	0	0	0	1	0	0	0	0	0	0	0	0	3	1.26561e-05
		F339	1	0	0	0	0	0	0	1	0	0	0	0	0	1	0	3	1.26561e-05
		K739	1	0	0	0	1	0	0	0	0	1	0	0	0	0	0	3	1.26561e-05
		I690	1	0	0	0	0	0	0	0	0	1	0	0	0	0	1	3	1.26561e-05
		C761	1	0	0	0	0	1	0	0	0	0	0	0	0	1	0	3	1.26561e-05
		F149	1	2	0	0	0	0	0	0	0	0	0	0	0	0	0	3	1.26561e-05
		Y309	1	0	0	0	0	0	0	1	0	0	0	0	0	0	1	3	1.26561e-05
		E120	1	0	0	0	2	0	0	0	0	0	0	0	0	0	0	3	1.26561e-05
		A169	0	0	2	0	0	0	0	1	0	0	0	0	0	0	0	3	1.26561e-05
		E662	0	0	0	0	0	0	0	0	0	0	0	1	0	0	2	3	1.26561e-05
		K572	0	0	0	0	1	0	0	0	0	0	0	1	0	1	0	3	1.26561e-05
		I731	0	1	1	0	0	0	0	0	0	0	0	0	0	1	0	3	1.26561e-05
		B92	0	0	1	0	0	0	1	1	0	0	0	0	0	0	0	3	1.26561e-05
		M169	0	0	0	0	0	0	0	0	1	0	2	0	0	0	0	3	1.26561e-05
		C383	0	0	0	0	0	0	0	0	0	2	0	0	0	1	0	3	1.26561e-05
		K37	0	1	0	0	0	0	2	0	0	0	0	0	0	0	0	3	1.26561e-05
		N280	0	0	0	1	0	0	1	0	0	0	0	0	0	1	0	3	1.26561e-05
		N049	0	0	0	0	0	0	1	0	1	0	0	0	1	0	0	3	1.26561e-05
		I400	0	0	0	0	0	1	0	0	1	0	1	0	0	0	0	3	1.26561e-05
		I281	0	0	0	0	0	0	0	0	0	0	1	1	1	0	0	3	1.26561e-05
		I891	0	0	0	1	0	0	0	0	0	0	1	0	1	0	0	3	1.26561e-05
		K291	0	0	0	0	0	1	1	0	0	0	1	0	0	0	0	3	1.26561e-05
		K721	0	0	0	0	0	0	0	1	0	0	1	0	0	1	0	3	1.26561e-05
		B199	0	0	0	0	0	0	1	0	0	0	1	0	0	0	1	3	1.26561e-05
		A35	0	2	0	0	0	1	0	0	0	0	0	0	0	0	0	3	1.26561e-05
		K430	0	1	0	0	1	0	0	0	0	0	0	0	1	0	0	3	1.26561e-05
		J13	0	1	0	0	0	0	0	0	0	0	1	1	0	0	0	3	1.26561e-05
		E274	0	1	0	0	1	0	0	1	0	0	0	0	0	0	0	3	1.26561e-05
		K590	0	1	1	0	0	0	0	0	0	0	1	0	0	0	0	3	1.26561e-05
		K720	0	1	0	0	0	0	0	0	0	1	1	0	0	0	0	3	1.26561e-05
		G403	0	1	0	0	0	0	0	1	0	0	0	0	1	0	0	3	1.26561e-05
		F199	0	1	0	0	0	0	0	0	0	0	0	0	0	2	0	3	1.26561e-05
		B189	0	1	0	1	0	0	0	0	0	0	0	0	0	1	0	3	1.26561e-05
		N111	0	1	0	0	0	0	1	0	0	0	0	0	1	0	0	3	1.26561e-05
		I348	0	0	0	0	0	0	0	0	0	1	0	0	0	2	0	3	1.26561e-05
		E41	0	0	0	0	0	0	1	0	0	0	1	0	0	0	1	3	1.26561e-05
		B54	0	0	0	1	1	0	1	0	0	0	0	0	0	0	0	3	1.26561e-05
		K221	0	0	0	1	1	1	0	0	0	0	0	0	0	0	0	3	1.26561e-05
		G621	0	0	0	0	1	1	0	0	0	1	0	0	0	0	0	3	1.26561e-05
		C160	0	0	0	0	0	0	0	0	0	1	1	0	0	1	0	3	1.26561e-05
		K513	0	0	0	1	2	0	0	0	0	0	0	0	0	0	0	3	1.26561e-05
		K318	0	0	0	0	0	1	0	1	0	0	0	0	0	0	1	3	1.26561e-05
		K564	0	0	1	0	0	0	0	0	0	0	2	0	0	0	0	3	1.26561e-05
		J410	0	0	0	0	0	0	0	1	0	1	0	1	0	0	0	3	1.26561e-05
		C480	0	0	0	0	0	1	0	0	1	0	0	1	0	0	0	3	1.26561e-05
		C221	0	0	0	0	0	1	0	1	0	0	0	0	0	0	1	3	1.26561e-05
		W179	0	0	0	0	0	0	0	0	0	0	1	0	2	0	0	3	1.26561e-05
		D62	0	0	0	2	0	0	1	0	0	0	0	0	0	0	0	3	1.26561e-05
		Q213	0	0	0	2	0	0	0	1	0	0	0	0	0	0	0	3	1.26561e-05
		M310	0	0	0	2	0	0	1	0	0	0	0	0	0	0	0	3	1.26561e-05
		B651	0	0	0	1	0	0	0	1	0	0	0	0	1	0	0	3	1.26561e-05
		W879	0	0	0	1	0	0	0	0	1	1	0	0	0	0	0	3	1.26561e-05
		C796	0	0	0	1	0	0	0	0	1	0	0	0	0	1	0	3	1.26561e-05
		Q250	0	0	0	1	0	0	0	0	0	0	1	0	1	0	0	3	1.26561e-05
		R54	0	0	0	1	0	0	0	1	0	0	0	0	1	0	0	3	1.26561e-05
		C01	0	0	0	1	0	0	0	1	0	0	1	0	0	0	0	3	1.26561e-05
		A084	0	0	0	1	0	1	0	0	0	0	1	0	0	0	0	3	1.26561e-05
		M332	0	0	0	1	0	1	0	0	1	0	0	0	0	0	0	3	1.26561e-05
		O998	0	0	0	1	0	0	0	0	0	1	1	0	0	0	0	3	1.26561e-05
		E069	0	0	0	1	0	0	0	1	0	0	1	0	0	0	0	3	1.26561e-05
		E052	0	0	0	1	0	1	0	0	0	0	0	1	0	0	0	3	1.26561e-05
		C819	0	0	0	0	0	0	0	0	1	1	0	1	0	0	0	3	1.26561e-05
		C109	0	0	0	0	0	1	0	0	0	0	0	1	1	0	0	3	1.26561e-05
		D570	0	0	0	0	0	0	0	0	0	1	0	1	0	1	0	3	1.26561e-05
		K439	0	0	0	0	0	1	1	1	0	0	0	0	0	0	0	3	1.26561e-05
		C412	0	0	0	0	0	0	0	0	0	0	0	1	2	0	0	3	1.26561e-05
		M009	0	0	0	0	1	0	0	0	0	0	2	0	0	0	0	3	1.26561e-05
		D70	0	0	0	0	1	0	0	0	0	0	0	1	0	0	1	3	1.26561e-05
		C716	0	0	0	0	1	1	0	0	0	0	1	0	0	0	0	3	1.26561e-05
		I300	0	0	0	0	1	0	0	1	0	0	0	0	1	0	0	3	1.26561e-05
		G458	0	0	0	0	1	0	1	0	0	0	0	0	0	1	0	3	1.26561e-05
		E130	0	0	0	0	1	0	0	1	1	0	0	0	0	0	0	3	1.26561e-05
		G318	0	0	0	0	1	0	2	0	0	0	0	0	0	0	0	3	1.26561e-05
		O150	0	0	0	0	0	2	0	0	0	0	0	0	0	1	0	3	1.26561e-05
		C300	0	0	0	0	0	1	0	0	1	0	0	0	0	1	0	3	1.26561e-05
		C442	0	0	0	0	0	2	0	0	0	0	0	0	1	0	0	3	1.26561e-05
		A060	0	0	0	0	0	1	0	0	1	0	1	0	0	0	0	3	1.26561e-05
		V099	0	0	0	0	0	1	0	0	0	0	2	0	0	0	0	3	1.26561e-05
		X649	0	0	0	0	0	1	0	0	1	0	0	0	1	0	0	3	1.26561e-05
		F332	0	0	0	0	0	0	1	0	0	0	0	1	0	1	0	3	1.26561e-05
		F110	0	0	0	0	0	1	0	0	0	1	1	0	0	0	0	3	1.26561e-05
		F323	0	0	0	0	0	1	0	1	0	0	1	0	0	0	0	3	1.26561e-05
		C791	0	0	0	0	0	1	1	0	0	1	0	0	0	0	0	3	1.26561e-05
		X689	0	0	0	0	0	0	3	0	0	0	0	0	0	0	0	3	1.26561e-05
		C119	0	0	0	0	0	0	2	1	0	0	0	0	0	0	0	3	1.26561e-05
		V486	0	0	0	0	0	0	2	0	0	0	1	0	0	0	0	3	1.26561e-05
		E125	0	0	0	0	0	0	0	0	2	0	0	0	1	0	0	3	1.26561e-05
		W789	0	0	0	0	0	0	0	0	0	1	1	0	1	0	0	3	1.26561e-05
		X680	0	0	0	0	0	0	1	0	0	1	0	0	0	0	1	3	1.26561e-05
		G404	0	0	0	0	0	0	1	0	0	0	1	1	0	0	0	3	1.26561e-05
		J853	0	0	0	0	0	0	1	0	0	0	0	1	0	0	1	3	1.26561e-05
		E135	0	0	0	0	0	0	0	1	0	0	0	0	2	0	0	3	1.26561e-05
		C578	0	0	0	0	0	0	0	0	2	0	0	1	0	0	0	3	1.26561e-05
		D508	0	0	0	0	0	0	0	0	1	0	0	1	0	1	0	3	1.26561e-05
		C218	0	0	0	0	0	0	0	0	0	1	0	0	1	0	1	3	1.26561e-05
		C718	0	0	0	0	0	0	0	0	0	1	1	0	0	1	0	3	1.26561e-05
		M350	0	0	0	0	0	0	0	0	0	1	1	0	1	0	0	3	1.26561e-05
		D608	2	0	0	0	0	0	0	0	0	0	0	0	0	0	0	2	8.43739e-06
		W698	1	0	0	0	0	0	0	0	0	0	1	0	0	0	0	2	8.43739e-06
		J64	1	0	0	0	0	0	0	0	0	0	1	0	0	0	0	2	8.43739e-06
		J209	1	0	1	0	0	0	0	0	0	0	0	0	0	0	0	2	8.43739e-06
		D473	1	0	0	0	0	0	1	0	0	0	0	0	0	0	0	2	8.43739e-06
		P570	1	1	0	0	0	0	0	0	0	0	0	0	0	0	0	2	8.43739e-06
		E127	1	0	0	0	0	0	0	0	0	0	0	1	0	0	0	2	8.43739e-06
		A180	1	0	0	1	0	0	0	0	0	0	0	0	0	0	0	2	8.43739e-06
		C494	1	0	1	0	0	0	0	0	0	0	0	0	0	0	0	2	8.43739e-06
		G709	1	0	0	0	0	0	0	0	0	1	0	0	0	0	0	2	8.43739e-06
		E041	1	0	0	0	0	0	1	0	0	0	0	0	0	0	0	2	8.43739e-06
		K421	1	0	0	0	0	1	0	0	0	0	0	0	0	0	0	2	8.43739e-06
		K229	1	0	0	0	0	0	0	0	1	0	0	0	0	0	0	2	8.43739e-06
		K820	1	0	0	0	0	0	1	0	0	0	0	0	0	0	0	2	8.43739e-06
		K928	1	0	0	0	0	0	0	0	0	0	0	0	1	0	0	2	8.43739e-06
		O721	1	1	0	0	0	0	0	0	0	0	0	0	0	0	0	2	8.43739e-06
		G930	1	0	0	0	0	0	0	0	0	1	0	0	0	0	0	2	8.43739e-06
		N159	1	0	0	0	0	0	0	0	0	0	0	0	0	1	0	2	8.43739e-06
		C384	1	0	0	0	0	1	0	0	0	0	0	0	0	0	0	2	8.43739e-06
		I516	1	0	0	0	0	0	0	1	0	0	0	0	0	0	0	2	8.43739e-06
		E671	1	0	0	0	0	0	0	0	0	0	0	1	0	0	0	2	8.43739e-06
		M320	1	0	0	0	0	0	0	0	1	0	0	0	0	0	0	2	8.43739e-06
		I729	1	0	0	0	0	0	0	0	1	0	0	0	0	0	0	2	8.43739e-06
		N059	1	0	0	0	0	0	0	1	0	0	0	0	0	0	0	2	8.43739e-06
		J982	1	0	0	0	0	0	0	0	0	0	0	1	0	0	0	2	8.43739e-06
		F190	1	0	0	0	0	0	0	0	0	0	0	0	0	0	1	2	8.43739e-06
		G710	1	0	0	0	0	0	0	0	1	0	0	0	0	0	0	2	8.43739e-06
		K701	0	0	0	0	0	0	1	0	1	0	0	0	0	0	0	2	8.43739e-06
		V299	0	0	0	0	0	0	1	1	0	0	0	0	0	0	0	2	8.43739e-06
		K861	0	0	0	0	0	0	0	1	1	0	0	0	0	0	0	2	8.43739e-06
		D377	0	0	0	0	0	0	1	0	0	0	0	1	0	0	0	2	8.43739e-06
		I423	0	2	0	0	0	0	0	0	0	0	0	0	0	0	0	2	8.43739e-06
		K295	0	0	0	0	0	0	0	1	0	0	0	0	0	1	0	2	8.43739e-06
		K610	0	0	0	0	0	0	0	0	0	0	0	1	1	0	0	2	8.43739e-06
		A86	0	0	0	1	0	0	0	0	0	0	0	0	0	1	0	2	8.43739e-06
		J981	0	1	0	0	0	0	0	0	0	0	0	0	0	1	0	2	8.43739e-06
		I613	0	0	0	1	0	0	0	0	0	1	0	0	0	0	0	2	8.43739e-06
		I069	0	0	0	0	0	0	1	0	0	1	0	0	0	0	0	2	8.43739e-06
		C950	0	0	0	0	0	0	0	0	0	0	1	0	0	0	1	2	8.43739e-06
		J451	0	0	0	0	0	1	0	0	1	0	0	0	0	0	0	2	8.43739e-06
		D489	0	0	0	0	0	1	0	1	0	0	0	0	0	0	0	2	8.43739e-06
		B659	0	0	0	0	0	0	0	0	0	0	0	0	1	0	1	2	8.43739e-06
		F103	0	0	1	0	1	0	0	0	0	0	0	0	0	0	0	2	8.43739e-06
		E854	0	0	1	0	0	0	0	0	0	0	0	0	0	1	0	2	8.43739e-06
		B201	0	0	0	0	1	0	0	1	0	0	0	0	0	0	0	2	8.43739e-06
		J939	0	1	0	0	0	0	0	0	1	0	0	0	0	0	0	2	8.43739e-06
		F106	0	0	1	0	0	0	1	0	0	0	0	0	0	0	0	2	8.43739e-06
		I011	0	1	0	0	0	0	0	0	0	1	0	0	0	0	0	2	8.43739e-06
		I238	0	0	0	0	0	0	0	0	0	0	0	1	1	0	0	2	8.43739e-06
		J704	0	2	0	0	0	0	0	0	0	0	0	0	0	0	0	2	8.43739e-06
		B571	0	1	0	0	0	0	0	0	1	0	0	0	0	0	0	2	8.43739e-06
		M165	0	1	0	0	0	0	0	0	0	1	0	0	0	0	0	2	8.43739e-06
		K20	0	1	0	0	0	0	0	0	0	0	0	1	0	0	0	2	8.43739e-06
		Y159	0	1	0	0	0	0	0	1	0	0	0	0	0	0	0	2	8.43739e-06
		Q221	0	1	0	0	0	0	0	1	0	0	0	0	0	0	0	2	8.43739e-06
		E840	0	1	0	0	0	0	1	0	0	0	0	0	0	0	0	2	8.43739e-06
		G039	0	1	0	0	0	0	0	0	0	0	0	1	0	0	0	2	8.43739e-06
		M859	0	1	0	0	0	0	0	0	0	0	0	0	0	1	0	2	8.43739e-06
		C186	0	1	0	0	0	0	0	0	0	1	0	0	0	0	0	2	8.43739e-06
		K711	0	1	0	0	0	0	0	0	0	0	0	0	1	0	0	2	8.43739e-06
		K558	0	1	0	0	0	0	0	0	0	0	1	0	0	0	0	2	8.43739e-06
		E640	0	1	0	0	0	0	0	0	1	0	0	0	0	0	0	2	8.43739e-06
		K571	0	1	0	0	0	0	0	0	0	0	1	0	0	0	0	2	8.43739e-06
		Q899	0	1	1	0	0	0	0	0	0	0	0	0	0	0	0	2	8.43739e-06
		G932	0	1	0	0	0	0	0	0	0	0	0	0	1	0	0	2	8.43739e-06
		Q212	0	1	0	0	0	0	0	0	0	0	0	1	0	0	0	2	8.43739e-06
		E859	0	1	0	0	0	1	0	0	0	0	0	0	0	0	0	2	8.43739e-06
		D471	0	1	0	0	0	0	0	0	0	1	0	0	0	0	0	2	8.43739e-06
		J100	0	0	0	0	0	0	0	0	0	0	0	0	0	2	0	2	8.43739e-06
		E122	0	0	0	0	0	0	0	0	0	0	1	0	1	0	0	2	8.43739e-06
		Q251	0	0	0	0	0	0	0	0	0	0	1	0	1	0	0	2	8.43739e-06
		Q259	0	0	0	0	1	0	0	0	1	0	0	0	0	0	0	2	8.43739e-06
		G589	0	0	0	1	0	1	0	0	0	0	0	0	0	0	0	2	8.43739e-06
		A319	0	0	1	0	0	0	0	1	0	0	0	0	0	0	0	2	8.43739e-06
		V289	0	0	0	0	0	0	0	0	1	0	0	0	0	1	0	2	8.43739e-06
		J168	0	0	0	0	0	0	0	0	0	0	1	0	0	1	0	2	8.43739e-06
		E748	0	0	0	1	0	0	0	0	0	0	0	1	0	0	0	2	8.43739e-06
		Q239	0	0	0	0	0	0	1	0	1	0	0	0	0	0	0	2	8.43739e-06
		X420	0	0	0	0	0	0	1	1	0	0	0	0	0	0	0	2	8.43739e-06
		I745	0	0	0	0	0	0	0	0	0	0	1	0	0	0	1	2	8.43739e-06
		J860	0	0	0	0	0	0	0	0	1	1	0	0	0	0	0	2	8.43739e-06
		D728	0	0	0	0	0	0	0	1	0	0	1	0	0	0	0	2	8.43739e-06
		I078	0	0	0	0	0	0	0	0	1	0	1	0	0	0	0	2	8.43739e-06
		E729	0	0	0	0	0	0	0	0	0	0	1	1	0	0	0	2	8.43739e-06
		R99	0	0	0	0	1	0	0	0	0	0	0	1	0	0	0	2	8.43739e-06
		I312	0	0	0	2	0	0	0	0	0	0	0	0	0	0	0	2	8.43739e-06
		B227	0	0	0	1	0	0	0	0	0	1	0	0	0	0	0	2	8.43739e-06
		D591	0	0	0	1	0	0	0	0	0	0	0	0	0	0	1	2	8.43739e-06
		K228	0	0	0	1	0	0	0	0	0	0	0	0	0	1	0	2	8.43739e-06
		G938	0	0	0	1	0	0	0	0	0	0	1	0	0	0	0	2	8.43739e-06
		B690	0	0	0	1	0	0	0	0	0	0	0	0	1	0	0	2	8.43739e-06
		I809	0	0	0	1	1	0	0	0	0	0	0	0	0	0	0	2	8.43739e-06
		O882	0	0	0	1	0	0	0	0	0	0	0	1	0	0	0	2	8.43739e-06
		I630	0	0	0	1	0	0	0	0	1	0	0	0	0	0	0	2	8.43739e-06
		G400	0	0	0	1	0	0	1	0	0	0	0	0	0	0	0	2	8.43739e-06
		K552	0	0	0	1	1	0	0	0	0	0	0	0	0	0	0	2	8.43739e-06
		D693	0	0	0	1	0	0	0	0	0	0	1	0	0	0	0	2	8.43739e-06
		D434	0	0	0	1	0	0	0	0	0	0	0	0	0	0	1	2	8.43739e-06
		E02	0	0	0	1	0	1	0	0	0	0	0	0	0	0	0	2	8.43739e-06
		I501	0	0	0	1	0	0	0	1	0	0	0	0	0	0	0	2	8.43739e-06
		C162	0	0	0	1	0	0	0	1	0	0	0	0	0	0	0	2	8.43739e-06
		G959	0	0	0	1	0	0	0	0	1	0	0	0	0	0	0	2	8.43739e-06
		I775	0	0	0	1	0	0	0	0	1	0	0	0	0	0	0	2	8.43739e-06
		I607	0	0	0	1	0	0	0	0	0	0	0	0	0	1	0	2	8.43739e-06
		K921	0	0	0	1	0	1	0	0	0	0	0	0	0	0	0	2	8.43739e-06
		C688	0	0	0	1	0	0	0	0	0	1	0	0	0	0	0	2	8.43739e-06
		Q612	0	0	0	1	0	0	0	0	0	1	0	0	0	0	0	2	8.43739e-06
		I132	0	0	0	1	0	0	0	0	0	0	0	1	0	0	0	2	8.43739e-06
		G118	0	0	0	1	0	0	0	0	0	0	0	1	0	0	0	2	8.43739e-06
		F333	0	0	0	0	0	1	1	0	0	0	0	0	0	0	0	2	8.43739e-06
		M339	0	0	0	0	0	0	0	0	0	0	1	1	0	0	0	2	8.43739e-06
		W790	0	0	0	0	1	0	0	0	0	0	0	0	0	0	1	2	8.43739e-06
		C749	0	0	0	0	0	0	0	0	0	0	1	0	0	1	0	2	8.43739e-06
		J431	0	0	0	0	0	0	0	0	0	0	0	0	0	1	1	2	8.43739e-06
		F107	0	0	0	0	0	0	0	0	0	0	0	1	0	0	1	2	8.43739e-06
		I620	0	0	0	0	1	0	0	0	0	0	0	1	0	0	0	2	8.43739e-06
		C919	0	0	0	0	0	1	0	0	0	0	0	0	0	0	1	2	8.43739e-06
		C261	0	0	0	0	0	0	0	1	0	0	0	0	1	0	0	2	8.43739e-06
		C340	0	0	0	0	0	0	1	0	0	0	1	0	0	0	0	2	8.43739e-06
		K351	0	0	0	0	0	1	0	0	1	0	0	0	0	0	0	2	8.43739e-06
		I951	0	0	0	0	1	0	0	1	0	0	0	0	0	0	0	2	8.43739e-06
		I018	0	0	0	0	1	0	0	0	0	0	0	0	1	0	0	2	8.43739e-06
		F142	0	0	0	0	1	0	0	0	0	0	0	1	0	0	0	2	8.43739e-06
		D391	0	0	0	0	1	0	1	0	0	0	0	0	0	0	0	2	8.43739e-06
		N738	0	0	0	0	1	0	0	1	0	0	0	0	0	0	0	2	8.43739e-06
		V235	0	0	0	0	0	0	0	0	1	0	1	0	0	0	0	2	8.43739e-06
		K429	0	0	0	0	0	0	0	1	1	0	0	0	0	0	0	2	8.43739e-06
		C931	0	0	0	0	1	0	0	0	1	0	0	0	0	0	0	2	8.43739e-06
		G10	0	0	0	0	1	0	0	1	0	0	0	0	0	0	0	2	8.43739e-06
		I512	0	0	0	0	1	0	0	0	1	0	0	0	0	0	0	2	8.43739e-06
		A047	0	0	0	0	0	0	0	0	2	0	0	0	0	0	0	2	8.43739e-06
		X337	0	0	0	0	1	0	0	0	0	1	0	0	0	0	0	2	8.43739e-06
		D448	0	0	0	0	1	0	0	1	0	0	0	0	0	0	0	2	8.43739e-06
		D589	0	0	0	0	0	0	0	0	1	0	0	0	0	1	0	2	8.43739e-06
		Q874	0	0	0	0	1	0	0	0	0	0	0	0	0	0	1	2	8.43739e-06
		I890	0	0	0	0	1	0	0	0	0	0	0	0	0	1	0	2	8.43739e-06
		A427	0	0	0	0	1	0	1	0	0	0	0	0	0	0	0	2	8.43739e-06
		D500	0	0	0	0	1	0	0	0	0	0	0	0	0	0	1	2	8.43739e-06
		Q225	0	0	0	0	1	0	0	0	0	0	0	0	0	1	0	2	8.43739e-06
		I070	0	0	0	0	1	0	0	1	0	0	0	0	0	0	0	2	8.43739e-06
		C929	0	0	0	0	0	0	0	1	0	0	0	0	1	0	0	2	8.43739e-06
		G049	0	0	0	0	1	0	0	0	0	0	0	0	1	0	0	2	8.43739e-06
		V489	0	0	0	0	0	0	1	0	0	0	0	0	0	0	1	2	8.43739e-06
		G969	0	0	0	0	1	0	0	0	0	0	1	0	0	0	0	2	8.43739e-06
		G009	0	0	0	0	1	0	0	0	1	0	0	0	0	0	0	2	8.43739e-06
		E340	0	0	0	0	1	1	0	0	0	0	0	0	0	0	0	2	8.43739e-06
		X629	0	0	0	0	0	0	1	1	0	0	0	0	0	0	0	2	8.43739e-06
		K658	0	0	0	0	1	0	0	1	0	0	0	0	0	0	0	2	8.43739e-06
		M179	0	0	0	0	1	1	0	0	0	0	0	0	0	0	0	2	8.43739e-06
		I740	0	0	0	0	1	0	0	0	1	0	0	0	0	0	0	2	8.43739e-06
		B559	0	0	0	0	0	1	0	1	0	0	0	0	0	0	0	2	8.43739e-06
		Q209	0	0	0	0	0	1	0	0	1	0	0	0	0	0	0	2	8.43739e-06
		K261	0	0	0	0	0	0	0	0	0	1	0	1	0	0	0	2	8.43739e-06
		C851	0	0	0	0	0	1	0	0	0	0	0	0	1	0	0	2	8.43739e-06
		J128	0	0	0	0	0	0	0	0	0	1	0	0	0	0	1	2	8.43739e-06
		N814	0	0	0	0	0	1	0	0	0	0	0	1	0	0	0	2	8.43739e-06
		J60	0	0	0	0	0	0	0	0	0	1	0	0	0	0	1	2	8.43739e-06
		K222	0	0	0	0	0	1	0	0	0	1	0	0	0	0	0	2	8.43739e-06
		K743	0	0	0	0	0	1	0	1	0	0	0	0	0	0	0	2	8.43739e-06
		V436	0	0	0	0	0	0	0	1	0	1	0	0	0	0	0	2	8.43739e-06
		E132	0	0	0	0	0	0	0	0	0	0	0	1	1	0	0	2	8.43739e-06
		Q233	0	0	0	0	0	1	0	0	0	0	0	1	0	0	0	2	8.43739e-06
		Y86	0	0	0	0	0	1	0	0	0	0	0	1	0	0	0	2	8.43739e-06
		L039	0	0	0	0	0	0	0	1	1	0	0	0	0	0	0	2	8.43739e-06
		K869	0	0	0	0	0	0	0	0	0	0	0	0	1	0	1	2	8.43739e-06
		E169	0	0	0	0	0	1	0	0	0	0	0	0	1	0	0	2	8.43739e-06
		E010	0	0	0	0	0	1	0	0	0	0	0	0	1	0	0	2	8.43739e-06
		J118	0	0	0	0	0	0	0	0	0	0	0	0	0	0	2	2	8.43739e-06
		I318	0	0	0	0	0	0	1	0	0	0	0	0	0	0	1	2	8.43739e-06
		W109	0	0	0	0	0	0	0	0	0	0	1	0	0	1	0	2	8.43739e-06
		X654	0	0	0	0	0	0	1	0	0	0	0	0	1	0	0	2	8.43739e-06
		E755	0	0	0	0	0	0	0	0	0	1	0	0	1	0	0	2	8.43739e-06
		D069	0	0	0	0	0	0	1	0	0	0	0	0	1	0	0	2	8.43739e-06
		I608	0	0	0	0	0	0	0	0	0	0	1	0	0	0	1	2	8.43739e-06
		K223	0	0	0	0	0	0	1	0	0	0	0	0	0	1	0	2	8.43739e-06
		M159	0	0	0	0	0	0	1	0	0	0	1	0	0	0	0	2	8.43739e-06
		F179	0	0	0	0	0	0	1	0	0	0	0	1	0	0	0	2	8.43739e-06
		D699	0	0	0	0	0	0	1	0	0	0	0	0	0	0	1	2	8.43739e-06
		D688	0	0	0	0	0	0	1	0	0	0	0	0	1	0	0	2	8.43739e-06
		C049	0	0	0	0	0	0	1	0	0	0	0	0	1	0	0	2	8.43739e-06
		X440	0	0	0	0	0	0	0	0	1	0	0	1	0	0	0	2	8.43739e-06
		F319	0	0	0	0	0	0	1	0	0	1	0	0	0	0	0	2	8.43739e-06
		D479	0	0	0	0	0	0	0	0	0	1	0	1	0	0	0	2	8.43739e-06
		K822	0	0	0	0	0	0	1	0	0	0	0	0	1	0	0	2	8.43739e-06
		F321	0	0	0	0	0	0	0	2	0	0	0	0	0	0	0	2	8.43739e-06
		D059	0	0	0	0	0	0	0	1	0	0	0	0	0	1	0	2	8.43739e-06
		Y149	0	0	0	0	0	0	0	1	0	0	0	0	1	0	0	2	8.43739e-06
		G903	0	0	0	0	0	0	0	1	0	0	0	0	0	0	1	2	8.43739e-06
		Y340	0	0	0	0	0	0	0	1	0	0	1	0	0	0	0	2	8.43739e-06
		E871	0	0	0	0	0	0	0	0	0	0	1	0	0	0	1	2	8.43739e-06
		N079	0	0	0	0	0	0	0	0	0	0	0	0	0	0	2	2	8.43739e-06
		A412	0	0	0	0	0	0	0	0	1	0	0	1	0	0	0	2	8.43739e-06
		O152	0	0	0	0	0	0	0	1	0	1	0	0	0	0	0	2	8.43739e-06
		I401	0	0	0	0	0	0	0	1	0	0	0	1	0	0	0	2	8.43739e-06
		C574	0	0	0	0	0	0	0	1	0	1	0	0	0	0	0	2	8.43739e-06
		R008	0	0	0	0	0	0	0	0	1	0	1	0	0	0	0	2	8.43739e-06
		I899	0	0	0	0	0	0	0	0	1	0	0	0	0	0	1	2	8.43739e-06
		D691	0	0	0	0	0	0	0	0	0	1	0	0	0	1	0	2	8.43739e-06
		C501	0	0	0	0	0	0	0	0	1	1	0	0	0	0	0	2	8.43739e-06
		K519	0	0	0	0	0	0	0	0	1	0	0	0	0	0	1	2	8.43739e-06
		M340	0	0	0	0	0	0	0	0	1	0	1	0	0	0	0	2	8.43739e-06
		I061	0	0	0	0	0	0	0	0	0	0	0	1	0	0	1	2	8.43739e-06
		K280	0	0	0	0	0	0	0	0	0	1	0	0	1	0	0	2	8.43739e-06
		G401	0	0	0	0	0	0	0	0	0	0	0	0	0	2	0	2	8.43739e-06
		J678	0	0	0	0	0	0	0	0	0	0	0	1	0	0	1	2	8.43739e-06
		P369	0	0	0	0	0	0	0	0	0	1	0	0	0	0	1	2	8.43739e-06
		W780	0	0	0	0	0	0	0	0	0	1	0	1	0	0	0	2	8.43739e-06
		D733	0	0	0	0	0	0	0	0	0	1	0	0	0	1	0	2	8.43739e-06
		I360	0	0	0	0	0	0	0	0	0	1	0	1	0	0	0	2	8.43739e-06
		Y840	0	0	0	0	0	0	0	0	0	0	0	0	0	1	1	2	8.43739e-06
		J848	0	0	0	0	0	0	0	0	0	0	0	0	0	1	1	2	8.43739e-06
		J661	0	0	0	0	0	0	0	0	0	0	1	0	0	1	0	2	8.43739e-06
		C408	0	0	0	0	0	0	0	0	0	0	1	0	1	0	0	2	8.43739e-06
		A403	0	0	0	0	0	0	0	0	0	0	0	2	0	0	0	2	8.43739e-06
		L409	0	0	0	0	0	0	0	0	0	0	0	1	0	0	1	2	8.43739e-06
		O13	0	0	0	0	0	0	0	0	0	0	0	0	2	0	0	2	8.43739e-06
		Q02	0	0	0	0	0	0	0	0	0	0	0	0	1	1	0	2	8.43739e-06
		P008	0	0	0	0	0	0	0	0	0	0	0	0	0	2	0	2	8.43739e-06
		E509	0	0	0	0	0	0	0	0	0	0	0	0	0	0	2	2	8.43739e-06
		J157	1	0	0	0	0	0	0	0	0	0	0	0	0	0	0	1	4.2187e-06
		Y300	1	0	0	0	0	0	0	0	0	0	0	0	0	0	0	1	4.2187e-06
		J398	1	0	0	0	0	0	0	0	0	0	0	0	0	0	0	1	4.2187e-06
		A279	1	0	0	0	0	0	0	0	0	0	0	0	0	0	0	1	4.2187e-06
		N824	1	0	0	0	0	0	0	0	0	0	0	0	0	0	0	1	4.2187e-06
		O992	1	0	0	0	0	0	0	0	0	0	0	0	0	0	0	1	4.2187e-06
		O723	1	0	0	0	0	0	0	0	0	0	0	0	0	0	0	1	4.2187e-06
		D410	1	0	0	0	0	0	0	0	0	0	0	0	0	0	0	1	4.2187e-06
		D369	1	0	0	0	0	0	0	0	0	0	0	0	0	0	0	1	4.2187e-06
		Q401	1	0	0	0	0	0	0	0	0	0	0	0	0	0	0	1	4.2187e-06
		G911	1	0	0	0	0	0	0	0	0	0	0	0	0	0	0	1	4.2187e-06
		N72	1	0	0	0	0	0	0	0	0	0	0	0	0	0	0	1	4.2187e-06
		G831	1	0	0	0	0	0	0	0	0	0	0	0	0	0	0	1	4.2187e-06
		K759	1	0	0	0	0	0	0	0	0	0	0	0	0	0	0	1	4.2187e-06
		L080	1	0	0	0	0	0	0	0	0	0	0	0	0	0	0	1	4.2187e-06
		D642	1	0	0	0	0	0	0	0	0	0	0	0	0	0	0	1	4.2187e-06
		C490	1	0	0	0	0	0	0	0	0	0	0	0	0	0	0	1	4.2187e-06
		C410	1	0	0	0	0	0	0	0	0	0	0	0	0	0	0	1	4.2187e-06
		I673	1	0	0	0	0	0	0	0	0	0	0	0	0	0	0	1	4.2187e-06
		A390	1	0	0	0	0	0	0	0	0	0	0	0	0	0	0	1	4.2187e-06
		N133	1	0	0	0	0	0	0	0	0	0	0	0	0	0	0	1	4.2187e-06
		E881	1	0	0	0	0	0	0	0	0	0	0	0	0	0	0	1	4.2187e-06
		D090	1	0	0	0	0	0	0	0	0	0	0	0	0	0	0	1	4.2187e-06
		G405	0	0	1	0	0	0	0	0	0	0	0	0	0	0	0	1	4.2187e-06
		K292	0	0	0	0	1	0	0	0	0	0	0	0	0	0	0	1	4.2187e-06
		F105	0	0	1	0	0	0	0	0	0	0	0	0	0	0	0	1	4.2187e-06
		Y883	0	0	0	0	0	0	0	1	0	0	0	0	0	0	0	1	4.2187e-06
		K868	0	0	0	0	0	0	0	0	1	0	0	0	0	0	0	1	4.2187e-06
		K860	0	0	0	0	0	0	1	0	0	0	0	0	0	0	0	1	4.2187e-06
		F104	0	0	0	0	0	1	0	0	0	0	0	0	0	0	0	1	4.2187e-06
		G934	0	1	0	0	0	0	0	0	0	0	0	0	0	0	0	1	4.2187e-06
		K560	0	0	0	0	0	0	0	0	0	0	0	0	0	1	0	1	4.2187e-06
		K256	0	0	0	0	0	0	1	0	0	0	0	0	0	0	0	1	4.2187e-06
		X700	0	0	0	0	0	0	0	0	0	0	0	0	0	0	1	1	4.2187e-06
		J430	0	0	0	0	0	0	0	1	0	0	0	0	0	0	0	1	4.2187e-06
		V446	0	0	0	0	0	0	0	0	1	0	0	0	0	0	0	1	4.2187e-06
		G231	0	0	0	0	0	0	0	0	0	0	0	0	0	0	1	1	4.2187e-06
		Q613	0	0	0	0	0	0	0	0	0	1	0	0	0	0	0	1	4.2187e-06
		K768	0	0	0	0	0	0	0	0	0	1	0	0	0	0	0	1	4.2187e-06
		Q205	0	0	0	0	0	1	0	0	0	0	0	0	0	0	0	1	4.2187e-06
		C910	0	0	0	0	0	0	0	1	0	0	0	0	0	0	0	1	4.2187e-06
		D464	0	0	0	0	0	0	0	0	0	0	0	1	0	0	0	1	4.2187e-06
		E708	0	0	0	0	0	0	0	0	1	0	0	0	0	0	0	1	4.2187e-06
		Y841	0	0	0	0	0	0	0	0	0	0	0	0	0	1	0	1	4.2187e-06
		J949	0	0	0	0	0	0	0	0	1	0	0	0	0	0	0	1	4.2187e-06
		B91	0	0	0	0	0	0	1	0	0	0	0	0	0	0	0	1	4.2187e-06
		V031	0	0	0	0	1	0	0	0	0	0	0	0	0	0	0	1	4.2187e-06
		D694	0	0	0	0	0	1	0	0	0	0	0	0	0	0	0	1	4.2187e-06
		X999	0	1	0	0	0	0	0	0	0	0	0	0	0	0	0	1	4.2187e-06
		B519	0	1	0	0	0	0	0	0	0	0	0	0	0	0	0	1	4.2187e-06
		V800	0	1	0	0	0	0	0	0	0	0	0	0	0	0	0	1	4.2187e-06
		I99	0	1	0	0	0	0	0	0	0	0	0	0	0	0	0	1	4.2187e-06
		F919	0	1	0	0	0	0	0	0	0	0	0	0	0	0	0	1	4.2187e-06
		H570	0	1	0	0	0	0	0	0	0	0	0	0	0	0	0	1	4.2187e-06
		K824	0	1	0	0	0	0	0	0	0	0	0	0	0	0	0	1	4.2187e-06
		F500	0	1	0	0	0	0	0	0	0	0	0	0	0	0	0	1	4.2187e-06
		V221	0	1	0	0	0	0	0	0	0	0	0	0	0	0	0	1	4.2187e-06
		C711	0	1	0	0	0	0	0	0	0	0	0	0	0	0	0	1	4.2187e-06
		M800	0	1	0	0	0	0	0	0	0	0	0	0	0	0	0	1	4.2187e-06
		C155	0	1	0	0	0	0	0	0	0	0	0	0	0	0	0	1	4.2187e-06
		M722	0	1	0	0	0	0	0	0	0	0	0	0	0	0	0	1	4.2187e-06
		M802	0	1	0	0	0	0	0	0	0	0	0	0	0	0	0	1	4.2187e-06
		J81	0	1	0	0	0	0	0	0	0	0	0	0	0	0	0	1	4.2187e-06
		J101	0	1	0	0	0	0	0	0	0	0	0	0	0	0	0	1	4.2187e-06
		G119	0	1	0	0	0	0	0	0	0	0	0	0	0	0	0	1	4.2187e-06
		C436	0	1	0	0	0	0	0	0	0	0	0	0	0	0	0	1	4.2187e-06
		D447	0	1	0	0	0	0	0	0	0	0	0	0	0	0	0	1	4.2187e-06
		I849	0	1	0	0	0	0	0	0	0	0	0	0	0	0	0	1	4.2187e-06
		C764	0	1	0	0	0	0	0	0	0	0	0	0	0	0	0	1	4.2187e-06
		N921	0	1	0	0	0	0	0	0	0	0	0	0	0	0	0	1	4.2187e-06
		X832	0	1	0	0	0	0	0	0	0	0	0	0	0	0	0	1	4.2187e-06
		K833	0	0	0	0	0	0	0	0	0	0	0	1	0	0	0	1	4.2187e-06
		K270	0	0	0	0	0	0	0	1	0	0	0	0	0	0	0	1	4.2187e-06
		G408	0	0	0	1	0	0	0	0	0	0	0	0	0	0	0	1	4.2187e-06
		I098	0	0	0	0	0	0	0	0	1	0	0	0	0	0	0	1	4.2187e-06
		K752	0	0	0	0	0	0	0	1	0	0	0	0	0	0	0	1	4.2187e-06
		G312	0	0	0	0	0	0	0	0	0	1	0	0	0	0	0	1	4.2187e-06
		B019	0	0	0	0	0	0	0	0	0	1	0	0	0	0	0	1	4.2187e-06
		X229	0	0	0	0	0	0	0	0	0	0	0	0	1	0	0	1	4.2187e-06
		D440	0	0	0	0	0	0	0	0	0	0	0	0	0	0	1	1	4.2187e-06
		K638	0	0	0	0	1	0	0	0	0	0	0	0	0	0	0	1	4.2187e-06
		F162	0	0	0	0	0	0	0	0	0	1	0	0	0	0	0	1	4.2187e-06
		N058	0	0	0	0	0	0	0	0	0	0	0	0	0	1	0	1	4.2187e-06
		J852	0	0	0	0	0	0	0	0	0	0	0	0	0	1	0	1	4.2187e-06
		D350	0	0	0	0	0	1	0	0	0	0	0	0	0	0	0	1	4.2187e-06
		W070	0	0	0	0	0	0	1	0	0	0	0	0	0	0	0	1	4.2187e-06
		X659	0	0	0	0	0	0	1	0	0	0	0	0	0	0	0	1	4.2187e-06
		I48	0	0	0	0	1	0	0	0	0	0	0	0	0	0	0	1	4.2187e-06
		K272	0	0	0	0	0	0	0	0	0	0	0	1	0	0	0	1	4.2187e-06
		Y269	0	0	0	0	0	0	0	1	0	0	0	0	0	0	0	1	4.2187e-06
		I615	0	0	0	0	0	0	0	0	0	0	0	0	1	0	0	1	4.2187e-06
		W809	0	0	0	0	0	0	0	0	0	0	0	0	1	0	0	1	4.2187e-06
		J689	0	0	0	0	0	0	1	0	0	0	0	0	0	0	0	1	4.2187e-06
		E720	0	0	0	1	0	0	0	0	0	0	0	0	0	0	0	1	4.2187e-06
		R688	0	0	0	1	0	0	0	0	0	0	0	0	0	0	0	1	4.2187e-06
		D430	0	0	0	1	0	0	0	0	0	0	0	0	0	0	0	1	4.2187e-06
		A179	0	0	0	1	0	0	0	0	0	0	0	0	0	0	0	1	4.2187e-06
		D891	0	0	0	1	0	0	0	0	0	0	0	0	0	0	0	1	4.2187e-06
		Y050	0	0	0	1	0	0	0	0	0	0	0	0	0	0	0	1	4.2187e-06
		F781	0	0	0	1	0	0	0	0	0	0	0	0	0	0	0	1	4.2187e-06
		C778	0	0	0	1	0	0	0	0	0	0	0	0	0	0	0	1	4.2187e-06
		E328	0	0	0	1	0	0	0	0	0	0	0	0	0	0	0	1	4.2187e-06
		I601	0	0	0	1	0	0	0	0	0	0	0	0	0	0	0	1	4.2187e-06
		J152	0	0	0	1	0	0	0	0	0	0	0	0	0	0	0	1	4.2187e-06
		B232	0	0	0	1	0	0	0	0	0	0	0	0	0	0	0	1	4.2187e-06
		E538	0	0	0	1	0	0	0	0	0	0	0	0	0	0	0	1	4.2187e-06
		O16	0	0	0	1	0	0	0	0	0	0	0	0	0	0	0	1	4.2187e-06
		L108	0	0	0	1	0	0	0	0	0	0	0	0	0	0	0	1	4.2187e-06
		N321	0	0	0	1	0	0	0	0	0	0	0	0	0	0	0	1	4.2187e-06
		G98	0	0	0	1	0	0	0	0	0	0	0	0	0	0	0	1	4.2187e-06
		K122	0	0	0	1	0	0	0	0	0	0	0	0	0	0	0	1	4.2187e-06
		X080	0	0	0	1	0	0	0	0	0	0	0	0	0	0	0	1	4.2187e-06
		C850	0	0	0	1	0	0	0	0	0	0	0	0	0	0	0	1	4.2187e-06
		V685	0	0	0	1	0	0	0	0	0	0	0	0	0	0	0	1	4.2187e-06
		Q790	0	0	0	1	0	0	0	0	0	0	0	0	0	0	0	1	4.2187e-06
		W850	0	0	0	1	0	0	0	0	0	0	0	0	0	0	0	1	4.2187e-06
		N820	0	0	0	1	0	0	0	0	0	0	0	0	0	0	0	1	4.2187e-06
		K900	0	0	0	1	0	0	0	0	0	0	0	0	0	0	0	1	4.2187e-06
		M478	0	0	0	1	0	0	0	0	0	0	0	0	0	0	0	1	4.2187e-06
		C785	0	0	0	0	0	0	0	0	1	0	0	0	0	0	0	1	4.2187e-06
		K715	0	0	0	0	0	0	0	0	0	0	0	0	0	1	0	1	4.2187e-06
		D414	0	0	0	0	0	0	0	0	0	0	0	0	1	0	0	1	4.2187e-06
		Q289	0	0	0	0	0	1	0	0	0	0	0	0	0	0	0	1	4.2187e-06
		P291	0	0	0	0	0	0	0	1	0	0	0	0	0	0	0	1	4.2187e-06
		A219	0	0	0	0	0	0	0	0	0	1	0	0	0	0	0	1	4.2187e-06
		C445	0	0	0	0	0	0	0	0	0	0	0	1	0	0	0	1	4.2187e-06
		M313	0	0	0	0	0	0	1	0	0	0	0	0	0	0	0	1	4.2187e-06
		C845	0	0	0	0	0	0	0	0	0	1	0	0	0	0	0	1	4.2187e-06
		J960	0	0	0	0	0	0	0	0	0	0	0	0	0	1	0	1	4.2187e-06
		G610	0	0	0	0	0	1	0	0	0	0	0	0	0	0	0	1	4.2187e-06
		D599	0	0	0	0	0	0	0	1	0	0	0	0	0	0	0	1	4.2187e-06
		C699	0	0	0	0	0	0	0	0	0	0	0	1	0	0	0	1	4.2187e-06
		B59	0	0	0	0	0	0	0	0	0	0	0	0	0	1	0	1	4.2187e-06
		K839	0	0	0	0	0	0	0	0	0	1	0	0	0	0	0	1	4.2187e-06
		C700	0	0	0	0	0	0	0	0	1	0	0	0	0	0	0	1	4.2187e-06
		C793	0	0	0	0	0	0	0	0	0	1	0	0	0	0	0	1	4.2187e-06
		G629	0	0	0	0	0	0	0	0	0	0	0	0	0	0	1	1	4.2187e-06
		X950	0	0	0	0	0	0	0	1	0	0	0	0	0	0	0	1	4.2187e-06
		B552	0	0	0	0	0	0	0	0	0	1	0	0	0	0	0	1	4.2187e-06
		I610	0	0	0	0	0	0	0	0	0	0	0	0	0	0	1	1	4.2187e-06
		M109	0	0	0	0	0	0	0	0	0	0	1	0	0	0	0	1	4.2187e-06
		B949	0	0	0	0	0	1	0	0	0	0	0	0	0	0	0	1	4.2187e-06
		D449	0	0	0	0	1	0	0	0	0	0	0	0	0	0	0	1	4.2187e-06
		E259	0	0	0	0	1	0	0	0	0	0	0	0	0	0	0	1	4.2187e-06
		M479	0	0	0	0	1	0	0	0	0	0	0	0	0	0	0	1	4.2187e-06
		C689	0	0	0	0	1	0	0	0	0	0	0	0	0	0	0	1	4.2187e-06
		W192	0	0	0	0	1	0	0	0	0	0	0	0	0	0	0	1	4.2187e-06
		Y119	0	0	0	0	1	0	0	0	0	0	0	0	0	0	0	1	4.2187e-06
		L022	0	0	0	0	0	0	0	0	0	0	1	0	0	0	0	1	4.2187e-06
		B650	0	0	0	0	1	0	0	0	0	0	0	0	0	0	0	1	4.2187e-06
		O151	0	0	0	0	1	0	0	0	0	0	0	0	0	0	0	1	4.2187e-06
		E807	0	0	0	0	1	0	0	0	0	0	0	0	0	0	0	1	4.2187e-06
		B779	0	0	0	0	1	0	0	0	0	0	0	0	0	0	0	1	4.2187e-06
		F051	0	0	0	0	1	0	0	0	0	0	0	0	0	0	0	1	4.2187e-06
		Q224	0	0	0	0	1	0	0	0	0	0	0	0	0	0	0	1	4.2187e-06
		C792	0	0	0	0	1	0	0	0	0	0	0	0	0	0	0	1	4.2187e-06
		A260	0	0	0	0	1	0	0	0	0	0	0	0	0	0	0	1	4.2187e-06
		L033	0	0	0	0	1	0	0	0	0	0	0	0	0	0	0	1	4.2187e-06
		K260	0	0	0	0	0	0	0	0	0	0	0	0	0	0	1	1	4.2187e-06
		D383	0	0	0	0	0	0	0	0	0	0	0	1	0	0	0	1	4.2187e-06
		Q605	0	0	0	0	1	0	0	0	0	0	0	0	0	0	0	1	4.2187e-06
		I130	0	0	0	0	0	0	0	0	0	0	0	0	0	0	1	1	4.2187e-06
		E743	0	0	0	0	1	0	0	0	0	0	0	0	0	0	0	1	4.2187e-06
		N719	0	0	0	0	1	0	0	0	0	0	0	0	0	0	0	1	4.2187e-06
		Q632	0	0	0	0	1	0	0	0	0	0	0	0	0	0	0	1	4.2187e-06
		X449	0	0	0	0	1	0	0	0	0	0	0	0	0	0	0	1	4.2187e-06
		F320	0	0	0	0	1	0	0	0	0	0	0	0	0	0	0	1	4.2187e-06
		I072	0	0	0	0	1	0	0	0	0	0	0	0	0	0	0	1	4.2187e-06
		K852	0	0	0	0	0	0	0	1	0	0	0	0	0	0	0	1	4.2187e-06
		B378	0	0	0	0	1	0	0	0	0	0	0	0	0	0	0	1	4.2187e-06
		W670	0	0	0	0	1	0	0	0	0	0	0	0	0	0	0	1	4.2187e-06
		I012	0	0	0	0	0	1	0	0	0	0	0	0	0	0	0	1	4.2187e-06
		Q244	0	0	0	0	1	0	0	0	0	0	0	0	0	0	0	1	4.2187e-06
		C248	0	0	0	0	1	0	0	0	0	0	0	0	0	0	0	1	4.2187e-06
		C224	0	0	0	0	1	0	0	0	0	0	0	0	0	0	0	1	4.2187e-06
		P240	0	0	0	0	1	0	0	0	0	0	0	0	0	0	0	1	4.2187e-06
		X459	0	0	0	0	0	0	0	0	0	0	0	0	1	0	0	1	4.2187e-06
		M469	0	0	0	0	0	0	0	0	0	0	0	0	0	1	0	1	4.2187e-06
		K823	0	0	0	0	1	0	0	0	0	0	0	0	0	0	0	1	4.2187e-06
		E271	0	0	0	0	1	0	0	0	0	0	0	0	0	0	0	1	4.2187e-06
		M628	0	0	0	0	1	0	0	0	0	0	0	0	0	0	0	1	4.2187e-06
		C400	0	0	0	0	1	0	0	0	0	0	0	0	0	0	0	1	4.2187e-06
		C183	0	0	0	0	1	0	0	0	0	0	0	0	0	0	0	1	4.2187e-06
		O11	0	0	0	0	1	0	0	0	0	0	0	0	0	0	0	1	4.2187e-06
		D014	0	0	0	0	0	0	0	0	0	1	0	0	0	0	0	1	4.2187e-06
		L509	0	0	0	0	1	0	0	0	0	0	0	0	0	0	0	1	4.2187e-06
		K419	0	0	0	0	1	0	0	0	0	0	0	0	0	0	0	1	4.2187e-06
		Q243	0	0	0	0	1	0	0	0	0	0	0	0	0	0	0	1	4.2187e-06
		V039	0	0	0	0	1	0	0	0	0	0	0	0	0	0	0	1	4.2187e-06
		E164	0	0	0	0	1	0	0	0	0	0	0	0	0	0	0	1	4.2187e-06
		X499	0	0	0	0	0	0	0	1	0	0	0	0	0	0	0	1	4.2187e-06
		P220	0	0	0	0	0	1	0	0	0	0	0	0	0	0	0	1	4.2187e-06
		E348	0	0	0	0	0	0	1	0	0	0	0	0	0	0	0	1	4.2187e-06
		K518	0	0	0	0	0	0	0	0	0	0	0	0	0	0	1	1	4.2187e-06
		N250	0	0	0	0	0	1	0	0	0	0	0	0	0	0	0	1	4.2187e-06
		L989	0	0	0	0	0	0	1	0	0	0	0	0	0	0	0	1	4.2187e-06
		X640	0	0	0	0	0	0	0	0	0	1	0	0	0	0	0	1	4.2187e-06
		C751	0	0	0	0	0	1	0	0	0	0	0	0	0	0	0	1	4.2187e-06
		Q618	0	0	0	0	0	0	0	0	0	0	0	1	0	0	0	1	4.2187e-06
		F058	0	0	0	0	0	1	0	0	0	0	0	0	0	0	0	1	4.2187e-06
		A022	0	0	0	0	0	1	0	0	0	0	0	0	0	0	0	1	4.2187e-06
		D097	0	0	0	0	0	1	0	0	0	0	0	0	0	0	0	1	4.2187e-06
		I371	0	0	0	0	0	0	0	0	0	0	1	0	0	0	0	1	4.2187e-06
		K252	0	0	0	0	0	0	0	0	0	0	0	0	0	0	1	1	4.2187e-06
		W782	0	0	0	0	0	0	0	1	0	0	0	0	0	0	0	1	4.2187e-06
		G723	0	0	0	0	0	1	0	0	0	0	0	0	0	0	0	1	4.2187e-06
		Y872	0	0	0	0	0	0	0	0	1	0	0	0	0	0	0	1	4.2187e-06
		B269	0	0	0	0	0	1	0	0	0	0	0	0	0	0	0	1	4.2187e-06
		C343	0	0	0	0	0	0	0	0	1	0	0	0	0	0	0	1	4.2187e-06
		D143	0	0	0	0	0	1	0	0	0	0	0	0	0	0	0	1	4.2187e-06
		D752	0	0	0	0	0	0	0	1	0	0	0	0	0	0	0	1	4.2187e-06
		L024	0	0	0	0	0	0	0	0	0	0	1	0	0	0	0	1	4.2187e-06
		B218	0	0	0	0	0	1	0	0	0	0	0	0	0	0	0	1	4.2187e-06
		C504	0	0	0	0	0	1	0	0	0	0	0	0	0	0	0	1	4.2187e-06
		L109	0	0	0	0	0	1	0	0	0	0	0	0	0	0	0	1	4.2187e-06
		C258	0	0	0	0	0	1	0	0	0	0	0	0	0	0	0	1	4.2187e-06
		J411	0	0	0	0	0	0	0	0	0	0	0	0	1	0	0	1	4.2187e-06
		Y579	0	0	0	0	0	1	0	0	0	0	0	0	0	0	0	1	4.2187e-06
		I898	0	0	0	0	0	1	0	0	0	0	0	0	0	0	0	1	4.2187e-06
		X330	0	0	0	0	0	0	0	0	1	0	0	0	0	0	0	1	4.2187e-06
		W694	0	0	0	0	0	1	0	0	0	0	0	0	0	0	0	1	4.2187e-06
		O235	0	0	0	0	0	1	0	0	0	0	0	0	0	0	0	1	4.2187e-06
		V234	0	0	0	0	0	0	0	0	0	0	0	0	0	1	0	1	4.2187e-06
		A199	0	0	0	0	0	0	0	1	0	0	0	0	0	0	0	1	4.2187e-06
		E68	0	0	0	0	0	1	0	0	0	0	0	0	0	0	0	1	4.2187e-06
		N138	0	0	0	0	0	1	0	0	0	0	0	0	0	0	0	1	4.2187e-06
		X648	0	0	0	0	0	1	0	0	0	0	0	0	0	0	0	1	4.2187e-06
		F29	0	0	0	0	0	1	0	0	0	0	0	0	0	0	0	1	4.2187e-06
		N759	0	0	0	0	0	1	0	0	0	0	0	0	0	0	0	1	4.2187e-06
		C182	0	0	0	0	0	1	0	0	0	0	0	0	0	0	0	1	4.2187e-06
		D374	0	0	0	0	0	1	0	0	0	0	0	0	0	0	0	1	4.2187e-06
		J698	0	0	0	0	0	0	0	0	1	0	0	0	0	0	0	1	4.2187e-06
		L031	0	0	0	0	0	0	1	0	0	0	0	0	0	0	0	1	4.2187e-06
		K717	0	0	0	0	0	0	1	0	0	0	0	0	0	0	0	1	4.2187e-06
		I308	0	0	0	0	0	0	1	0	0	0	0	0	0	0	0	1	4.2187e-06
		Y190	0	0	0	0	0	0	0	1	0	0	0	0	0	0	0	1	4.2187e-06
		Y120	0	0	0	0	0	0	0	0	1	0	0	0	0	0	0	1	4.2187e-06
		D530	0	0	0	0	0	0	1	0	0	0	0	0	0	0	0	1	4.2187e-06
		B018	0	0	0	0	0	0	1	0	0	0	0	0	0	0	0	1	4.2187e-06
		C540	0	0	0	0	0	0	1	0	0	0	0	0	0	0	0	1	4.2187e-06
		D380	0	0	0	0	0	0	0	0	0	0	0	0	0	0	1	1	4.2187e-06
		E215	0	0	0	0	0	0	1	0	0	0	0	0	0	0	0	1	4.2187e-06
		G450	0	0	0	0	0	0	1	0	0	0	0	0	0	0	0	1	4.2187e-06
		F328	0	0	0	0	0	0	1	0	0	0	0	0	0	0	0	1	4.2187e-06
		A400	0	0	0	0	0	0	1	0	0	0	0	0	0	0	0	1	4.2187e-06
		F259	0	0	0	0	0	0	1	0	0	0	0	0	0	0	0	1	4.2187e-06
		C833	0	0	0	0	0	0	0	0	0	0	0	0	0	1	0	1	4.2187e-06
		M082	0	0	0	0	0	0	1	0	0	0	0	0	0	0	0	1	4.2187e-06
		I720	0	0	0	0	0	0	0	0	0	0	1	0	0	0	0	1	4.2187e-06
		H819	0	0	0	0	0	0	1	0	0	0	0	0	0	0	0	1	4.2187e-06
		I068	0	0	0	0	0	0	1	0	0	0	0	0	0	0	0	1	4.2187e-06
		I471	0	0	0	0	0	0	1	0	0	0	0	0	0	0	0	1	4.2187e-06
		E661	0	0	0	0	0	0	1	0	0	0	0	0	0	0	0	1	4.2187e-06
		C901	0	0	0	0	0	0	1	0	0	0	0	0	0	0	0	1	4.2187e-06
		I864	0	0	0	0	0	0	1	0	0	0	0	0	0	0	0	1	4.2187e-06
		C767	0	0	0	0	0	0	1	0	0	0	0	0	0	0	0	1	4.2187e-06
		W229	0	0	0	0	0	0	1	0	0	0	0	0	0	0	0	1	4.2187e-06
		W999	0	0	0	0	0	0	1	0	0	0	0	0	0	0	0	1	4.2187e-06
		M191	0	0	0	0	0	0	1	0	0	0	0	0	0	0	0	1	4.2187e-06
		I311	0	0	0	0	0	0	0	0	1	0	0	0	0	0	0	1	4.2187e-06
		I788	0	0	0	0	0	0	1	0	0	0	0	0	0	0	0	1	4.2187e-06
		M052	0	0	0	0	0	0	1	0	0	0	0	0	0	0	0	1	4.2187e-06
		C670	0	0	0	0	0	0	1	0	0	0	0	0	0	0	0	1	4.2187e-06
		J029	0	0	0	0	0	0	1	0	0	0	0	0	0	0	0	1	4.2187e-06
		E211	0	0	0	0	0	0	0	0	0	0	0	0	0	1	0	1	4.2187e-06
		I082	0	0	0	0	0	0	0	0	0	0	1	0	0	0	0	1	4.2187e-06
		C341	0	0	0	0	0	0	0	0	0	0	0	0	0	0	1	1	4.2187e-06
		N23	0	0	0	0	0	0	0	0	0	0	0	0	1	0	0	1	4.2187e-06
		C922	0	0	0	0	0	0	1	0	0	0	0	0	0	0	0	1	4.2187e-06
		O742	0	0	0	0	0	0	1	0	0	0	0	0	0	0	0	1	4.2187e-06
		D610	0	0	0	0	0	0	0	0	0	0	0	0	1	0	0	1	4.2187e-06
		W840	0	0	0	0	0	0	0	0	0	1	0	0	0	0	0	1	4.2187e-06
		W015	0	0	0	0	0	0	1	0	0	0	0	0	0	0	0	1	4.2187e-06
		D381	0	0	0	0	0	0	0	1	0	0	0	0	0	0	0	1	4.2187e-06
		V224	0	0	0	0	0	0	0	1	0	0	0	0	0	0	0	1	4.2187e-06
		I635	0	0	0	0	0	0	0	0	0	0	0	0	0	0	1	1	4.2187e-06
		G729	0	0	0	0	0	0	0	0	0	0	0	0	0	1	0	1	4.2187e-06
		Y142	0	0	0	0	0	0	0	1	0	0	0	0	0	0	0	1	4.2187e-06
		E15	0	0	0	0	0	0	0	0	0	0	0	0	0	1	0	1	4.2187e-06
		D015	0	0	0	0	0	0	0	1	0	0	0	0	0	0	0	1	4.2187e-06
		D049	0	0	0	0	0	0	0	1	0	0	0	0	0	0	0	1	4.2187e-06
		Y575	0	0	0	0	0	0	0	0	0	0	1	0	0	0	0	1	4.2187e-06
		Y330	0	0	0	0	0	0	0	1	0	0	0	0	0	0	0	1	4.2187e-06
		L511	0	0	0	0	0	0	0	1	0	0	0	0	0	0	0	1	4.2187e-06
		C438	0	0	0	0	0	0	0	1	0	0	0	0	0	0	0	1	4.2187e-06
		X448	0	0	0	0	0	0	0	1	0	0	0	0	0	0	0	1	4.2187e-06
		O995	0	0	0	0	0	0	0	1	0	0	0	0	0	0	0	1	4.2187e-06
		A188	0	0	0	0	0	0	0	0	0	0	0	0	0	1	0	1	4.2187e-06
		W012	0	0	0	0	0	0	0	1	0	0	0	0	0	0	0	1	4.2187e-06
		K591	0	0	0	0	0	0	0	0	0	0	0	0	0	1	0	1	4.2187e-06
		G900	0	0	0	0	0	0	0	1	0	0	0	0	0	0	0	1	4.2187e-06
		I029	0	0	0	0	0	0	0	0	1	0	0	0	0	0	0	1	4.2187e-06
		D099	0	0	0	0	0	0	0	1	0	0	0	0	0	0	0	1	4.2187e-06
		E060	0	0	0	0	0	0	0	1	0	0	0	0	0	0	0	1	4.2187e-06
		I159	0	0	0	0	0	0	0	1	0	0	0	0	0	0	0	1	4.2187e-06
		Q281	0	0	0	0	0	0	0	1	0	0	0	0	0	0	0	1	4.2187e-06
		I888	0	0	0	0	0	0	0	1	0	0	0	0	0	0	0	1	4.2187e-06
		F419	0	0	0	0	0	0	0	1	0	0	0	0	0	0	0	1	4.2187e-06
		E617	0	0	0	0	0	0	0	1	0	0	0	0	0	0	0	1	4.2187e-06
		X450	0	0	0	0	0	0	0	1	0	0	0	0	0	0	0	1	4.2187e-06
		N818	0	0	0	0	0	0	0	1	0	0	0	0	0	0	0	1	4.2187e-06
		K210	0	0	0	0	0	0	0	1	0	0	0	0	0	0	0	1	4.2187e-06
		J930	0	0	0	0	0	0	0	0	0	0	0	0	1	0	0	1	4.2187e-06
		O039	0	0	0	0	0	0	0	1	0	0	0	0	0	0	0	1	4.2187e-06
		C040	0	0	0	0	0	0	0	1	0	0	0	0	0	0	0	1	4.2187e-06
		D751	0	0	0	0	0	0	0	1	0	0	0	0	0	0	0	1	4.2187e-06
		M432	0	0	0	0	0	0	0	1	0	0	0	0	0	0	0	1	4.2187e-06
		G239	0	0	0	0	0	0	0	1	0	0	0	0	0	0	0	1	4.2187e-06
		Q230	0	0	0	0	0	0	0	1	0	0	0	0	0	0	0	1	4.2187e-06
		D179	0	0	0	0	0	0	0	1	0	0	0	0	0	0	0	1	4.2187e-06
		I721	0	0	0	0	0	0	0	0	1	0	0	0	0	0	0	1	4.2187e-06
		F913	0	0	0	0	0	0	0	1	0	0	0	0	0	0	0	1	4.2187e-06
		X424	0	0	0	0	0	0	0	0	1	0	0	0	0	0	0	1	4.2187e-06
		G210	0	0	0	0	0	0	0	0	1	0	0	0	0	0	0	1	4.2187e-06
		K761	0	0	0	0	0	0	0	0	1	0	0	0	0	0	0	1	4.2187e-06
		I871	0	0	0	0	0	0	0	0	1	0	0	0	0	0	0	1	4.2187e-06
		L021	0	0	0	0	0	0	0	0	0	0	0	1	0	0	0	1	4.2187e-06
		G473	0	0	0	0	0	0	0	0	1	0	0	0	0	0	0	1	4.2187e-06
		G808	0	0	0	0	0	0	0	0	1	0	0	0	0	0	0	1	4.2187e-06
		K660	0	0	0	0	0	0	0	0	1	0	0	0	0	0	0	1	4.2187e-06
		G712	0	0	0	0	0	0	0	0	1	0	0	0	0	0	0	1	4.2187e-06
		C924	0	0	0	0	0	0	0	0	1	0	0	0	0	0	0	1	4.2187e-06
		F182	0	0	0	0	0	0	0	0	1	0	0	0	0	0	0	1	4.2187e-06
		K828	0	0	0	0	0	0	0	0	1	0	0	0	0	0	0	1	4.2187e-06
		P290	0	0	0	0	0	0	0	0	0	0	1	0	0	0	0	1	4.2187e-06
		K521	0	0	0	0	0	0	0	0	0	1	0	0	0	0	0	1	4.2187e-06
		J040	0	0	0	0	0	0	0	0	1	0	0	0	0	0	0	1	4.2187e-06
		M064	0	0	0	0	0	0	0	0	1	0	0	0	0	0	0	1	4.2187e-06
		M300	0	0	0	0	0	0	0	0	1	0	0	0	0	0	0	1	4.2187e-06
		W209	0	0	0	0	0	0	0	0	1	0	0	0	0	0	0	1	4.2187e-06
		M489	0	0	0	0	0	0	0	0	1	0	0	0	0	0	0	1	4.2187e-06
		O993	0	0	0	0	0	0	0	0	1	0	0	0	0	0	0	1	4.2187e-06
		W069	0	0	0	0	0	0	0	0	1	0	0	0	0	0	0	1	4.2187e-06
		C12	0	0	0	0	0	0	0	0	1	0	0	0	0	0	0	1	4.2187e-06
		Q019	0	0	0	0	0	0	0	0	0	1	0	0	0	0	0	1	4.2187e-06
		D379	0	0	0	0	0	0	0	0	1	0	0	0	0	0	0	1	4.2187e-06
		C758	0	0	0	0	0	0	0	0	1	0	0	0	0	0	0	1	4.2187e-06
		D319	0	0	0	0	0	0	0	0	1	0	0	0	0	0	0	1	4.2187e-06
		C062	0	0	0	0	0	0	0	0	1	0	0	0	0	0	0	1	4.2187e-06
		C714	0	0	0	0	0	0	0	0	1	0	0	0	0	0	0	1	4.2187e-06
		N832	0	0	0	0	0	0	0	0	1	0	0	0	0	0	0	1	4.2187e-06
		C450	0	0	0	0	0	0	0	0	0	0	0	1	0	0	0	1	4.2187e-06
		I079	0	0	0	0	0	0	0	0	1	0	0	0	0	0	0	1	4.2187e-06
		N151	0	0	0	0	0	0	0	0	0	0	0	0	1	0	0	1	4.2187e-06
		D390	0	0	0	0	0	0	0	0	1	0	0	0	0	0	0	1	4.2187e-06
		C390	0	0	0	0	0	0	0	0	1	0	0	0	0	0	0	1	4.2187e-06
		W172	0	0	0	0	0	0	0	0	1	0	0	0	0	0	0	1	4.2187e-06
		X230	0	0	0	0	0	0	0	0	0	0	0	0	1	0	0	1	4.2187e-06
		E700	0	0	0	0	0	0	0	0	0	1	0	0	0	0	0	1	4.2187e-06
		C165	0	0	0	0	0	0	0	0	1	0	0	0	0	0	0	1	4.2187e-06
		W170	0	0	0	0	0	0	0	0	0	0	0	0	0	0	1	1	4.2187e-06
		J680	0	0	0	0	0	0	0	0	1	0	0	0	0	0	0	1	4.2187e-06
		P010	0	0	0	0	0	0	0	0	1	0	0	0	0	0	0	1	4.2187e-06
		I280	0	0	0	0	0	0	0	0	1	0	0	0	0	0	0	1	4.2187e-06
		C321	0	0	0	0	0	0	0	0	0	0	1	0	0	0	0	1	4.2187e-06
		O988	0	0	0	0	0	0	0	0	1	0	0	0	0	0	0	1	4.2187e-06
		F412	0	0	0	0	0	0	0	0	0	1	0	0	0	0	0	1	4.2187e-06
		F122	0	0	0	0	0	0	0	0	0	1	0	0	0	0	0	1	4.2187e-06
		F112	0	0	0	0	0	0	0	0	0	1	0	0	0	0	0	1	4.2187e-06
		O265	0	0	0	0	0	0	0	0	0	1	0	0	0	0	0	1	4.2187e-06
		E619	0	0	0	0	0	0	0	0	0	1	0	0	0	0	0	1	4.2187e-06
		N002	0	0	0	0	0	0	0	0	0	1	0	0	0	0	0	1	4.2187e-06
		D695	0	0	0	0	0	0	0	0	0	1	0	0	0	0	0	1	4.2187e-06
		K567	0	0	0	0	0	0	0	0	0	0	0	0	0	1	0	1	4.2187e-06
		O459	0	0	0	0	0	0	0	0	0	1	0	0	0	0	0	1	4.2187e-06
		F89	0	0	0	0	0	0	0	0	0	1	0	0	0	0	0	1	4.2187e-06
		B334	0	0	0	0	0	0	0	0	0	1	0	0	0	0	0	1	4.2187e-06
		G112	0	0	0	0	0	0	0	0	0	0	1	0	0	0	0	1	4.2187e-06
		O120	0	0	0	0	0	0	0	0	0	1	0	0	0	0	0	1	4.2187e-06
		A988	0	0	0	0	0	0	0	0	0	1	0	0	0	0	0	1	4.2187e-06
		O720	0	0	0	0	0	0	0	0	0	1	0	0	0	0	0	1	4.2187e-06
		B190	0	0	0	0	0	0	0	0	0	1	0	0	0	0	0	1	4.2187e-06
		C969	0	0	0	0	0	0	0	0	0	0	0	0	0	1	0	1	4.2187e-06
		C050	0	0	0	0	0	0	0	0	0	1	0	0	0	0	0	1	4.2187e-06
		F160	0	0	0	0	0	0	0	0	0	1	0	0	0	0	0	1	4.2187e-06
		Y570	0	0	0	0	0	0	0	0	0	1	0	0	0	0	0	1	4.2187e-06
		N837	0	0	0	0	0	0	0	0	0	1	0	0	0	0	0	1	4.2187e-06
		E134	0	0	0	0	0	0	0	0	0	1	0	0	0	0	0	1	4.2187e-06
		Q240	0	0	0	0	0	0	0	0	0	0	0	0	1	0	0	1	4.2187e-06
		I779	0	0	0	0	0	0	0	0	0	1	0	0	0	0	0	1	4.2187e-06
		X610	0	0	0	0	0	0	0	0	0	1	0	0	0	0	0	1	4.2187e-06
		K294	0	0	0	0	0	0	0	0	0	1	0	0	0	0	0	1	4.2187e-06
		W540	0	0	0	0	0	0	0	0	0	1	0	0	0	0	0	1	4.2187e-06
		I770	0	0	0	0	0	0	0	0	0	1	0	0	0	0	0	1	4.2187e-06
		M154	0	0	0	0	0	0	0	0	0	1	0	0	0	0	0	1	4.2187e-06
		K909	0	0	0	0	0	0	0	0	0	1	0	0	0	0	0	1	4.2187e-06
		J635	0	0	0	0	0	0	0	0	0	1	0	0	0	0	0	1	4.2187e-06
		K451	0	0	0	0	0	0	0	0	0	0	0	0	1	0	0	1	4.2187e-06
		C023	0	0	0	0	0	0	0	0	0	1	0	0	0	0	0	1	4.2187e-06
		M629	0	0	0	0	0	0	0	0	0	0	1	0	0	0	0	1	4.2187e-06
		J108	0	0	0	0	0	0	0	0	0	0	0	0	0	1	0	1	4.2187e-06
		O868	0	0	0	0	0	0	0	0	0	0	1	0	0	0	0	1	4.2187e-06
		W188	0	0	0	0	0	0	0	0	0	0	1	0	0	0	0	1	4.2187e-06
		C257	0	0	0	0	0	0	0	0	0	0	1	0	0	0	0	1	4.2187e-06
		O441	0	0	0	0	0	0	0	0	0	0	1	0	0	0	0	1	4.2187e-06
		I820	0	0	0	0	0	0	0	0	0	0	0	1	0	0	0	1	4.2187e-06
		C227	0	0	0	0	0	0	0	0	0	0	0	0	1	0	0	1	4.2187e-06
		C108	0	0	0	0	0	0	0	0	0	0	1	0	0	0	0	1	4.2187e-06
		K719	0	0	0	0	0	0	0	0	0	0	1	0	0	0	0	1	4.2187e-06
		Q218	0	0	0	0	0	0	0	0	0	0	1	0	0	0	0	1	4.2187e-06
		V030	0	0	0	0	0	0	0	0	0	0	1	0	0	0	0	1	4.2187e-06
		I773	0	0	0	0	0	0	0	0	0	0	1	0	0	0	0	1	4.2187e-06
		E40	0	0	0	0	0	0	0	0	0	0	1	0	0	0	0	1	4.2187e-06
		N700	0	0	0	0	0	0	0	0	0	0	1	0	0	0	0	1	4.2187e-06
		C399	0	0	0	0	0	0	0	0	0	0	0	1	0	0	0	1	4.2187e-06
		A152	0	0	0	0	0	0	0	0	0	0	1	0	0	0	0	1	4.2187e-06
		D486	0	0	0	0	0	0	0	0	0	0	1	0	0	0	0	1	4.2187e-06
		D103	0	0	0	0	0	0	0	0	0	0	1	0	0	0	0	1	4.2187e-06
		X220	0	0	0	0	0	0	0	0	0	0	1	0	0	0	0	1	4.2187e-06
		W014	0	0	0	0	0	0	0	0	0	0	0	0	1	0	0	1	4.2187e-06
		N136	0	0	0	0	0	0	0	0	0	0	0	0	1	0	0	1	4.2187e-06
		H659	0	0	0	0	0	0	0	0	0	0	1	0	0	0	0	1	4.2187e-06
		C493	0	0	0	0	0	0	0	0	0	0	1	0	0	0	0	1	4.2187e-06
		J668	0	0	0	0	0	0	0	0	0	0	1	0	0	0	0	1	4.2187e-06
		C024	0	0	0	0	0	0	0	0	0	0	1	0	0	0	0	1	4.2187e-06
		C902	0	0	0	0	0	0	0	0	0	0	0	0	0	1	0	1	4.2187e-06
		X100	0	0	0	0	0	0	0	0	0	0	1	0	0	0	0	1	4.2187e-06
		Q439	0	0	0	0	0	0	0	0	0	0	1	0	0	0	0	1	4.2187e-06
		F438	0	0	0	0	0	0	0	0	0	0	1	0	0	0	0	1	4.2187e-06
		B220	0	0	0	0	0	0	0	0	0	0	1	0	0	0	0	1	4.2187e-06
		C118	0	0	0	0	0	0	0	0	0	0	0	1	0	0	0	1	4.2187e-06
		G609	0	0	0	0	0	0	0	0	0	0	0	1	0	0	0	1	4.2187e-06
		N030	0	0	0	0	0	0	0	0	0	0	0	1	0	0	0	1	4.2187e-06
		O879	0	0	0	0	0	0	0	0	0	0	0	1	0	0	0	1	4.2187e-06
		D483	0	0	0	0	0	0	0	0	0	0	0	1	0	0	0	1	4.2187e-06
		E272	0	0	0	0	0	0	0	0	0	0	0	1	0	0	0	1	4.2187e-06
		K763	0	0	0	0	0	0	0	0	0	0	0	1	0	0	0	1	4.2187e-06
		Y848	0	0	0	0	0	0	0	0	0	0	0	1	0	0	0	1	4.2187e-06
		O140	0	0	0	0	0	0	0	0	0	0	0	1	0	0	0	1	4.2187e-06
		Q056	0	0	0	0	0	0	0	0	0	0	0	1	0	0	0	1	4.2187e-06
		I515	0	0	0	0	0	0	0	0	0	0	0	1	0	0	0	1	4.2187e-06
		K253	0	0	0	0	0	0	0	0	0	0	0	1	0	0	0	1	4.2187e-06
		N768	0	0	0	0	0	0	0	0	0	0	0	1	0	0	0	1	4.2187e-06
		C448	0	0	0	0	0	0	0	0	0	0	0	0	1	0	0	1	4.2187e-06
		D046	0	0	0	0	0	0	0	0	0	0	0	1	0	0	0	1	4.2187e-06
		W061	0	0	0	0	0	0	0	0	0	0	0	1	0	0	0	1	4.2187e-06
		P612	0	0	0	0	0	0	0	0	0	0	0	1	0	0	0	1	4.2187e-06
		C342	0	0	0	0	0	0	0	0	0	0	0	0	0	0	1	1	4.2187e-06
		M125	0	0	0	0	0	0	0	0	0	0	0	1	0	0	0	1	4.2187e-06
		J210	0	0	0	0	0	0	0	0	0	0	0	1	0	0	0	1	4.2187e-06
		C252	0	0	0	0	0	0	0	0	0	0	0	1	0	0	0	1	4.2187e-06
		C099	0	0	0	0	0	0	0	0	0	0	0	1	0	0	0	1	4.2187e-06
		M153	0	0	0	0	0	0	0	0	0	0	0	1	0	0	0	1	4.2187e-06
		F205	0	0	0	0	0	0	0	0	0	0	0	1	0	0	0	1	4.2187e-06
		O109	0	0	0	0	0	0	0	0	0	0	0	1	0	0	0	1	4.2187e-06
		L931	0	0	0	0	0	0	0	0	0	0	0	1	0	0	0	1	4.2187e-06
		E011	0	0	0	0	0	0	0	0	0	0	0	1	0	0	0	1	4.2187e-06
		W740	0	0	0	0	0	0	0	0	0	0	0	1	0	0	0	1	4.2187e-06
		E343	0	0	0	0	0	0	0	0	0	0	0	1	0	0	0	1	4.2187e-06
		N118	0	0	0	0	0	0	0	0	0	0	0	1	0	0	0	1	4.2187e-06
		B004	0	0	0	0	0	0	0	0	0	0	0	1	0	0	0	1	4.2187e-06
		A959	0	0	0	0	0	0	0	0	0	0	0	1	0	0	0	1	4.2187e-06
		G402	0	0	0	0	0	0	0	0	0	0	0	0	1	0	0	1	4.2187e-06
		O909	0	0	0	0	0	0	0	0	0	0	0	0	1	0	0	1	4.2187e-06
		D487	0	0	0	0	0	0	0	0	0	0	0	0	1	0	0	1	4.2187e-06
		I841	0	0	0	0	0	0	0	0	0	0	0	0	1	0	0	1	4.2187e-06
		D538	0	0	0	0	0	0	0	0	0	0	0	0	1	0	0	1	4.2187e-06
		J432	0	0	0	0	0	0	0	0	0	0	0	0	1	0	0	1	4.2187e-06
		C446	0	0	0	0	0	0	0	0	0	0	0	0	1	0	0	1	4.2187e-06
		D432	0	0	0	0	0	0	0	0	0	0	0	0	1	0	0	1	4.2187e-06
		Q603	0	0	0	0	0	0	0	0	0	0	0	0	1	0	0	1	4.2187e-06
		I614	0	0	0	0	0	0	0	0	0	0	0	0	1	0	0	1	4.2187e-06
		M726	0	0	0	0	0	0	0	0	0	0	0	0	1	0	0	1	4.2187e-06
		X084	0	0	0	0	0	0	0	0	0	0	0	0	1	0	0	1	4.2187e-06
		Q049	0	0	0	0	0	0	0	0	0	0	0	0	1	0	0	1	4.2187e-06
		C382	0	0	0	0	0	0	0	0	0	0	0	0	1	0	0	1	4.2187e-06
		K528	0	0	0	0	0	0	0	0	0	0	0	0	1	0	0	1	4.2187e-06
		X200	0	0	0	0	0	0	0	0	0	0	0	0	1	0	0	1	4.2187e-06
		D467	0	0	0	0	0	0	0	0	0	0	0	0	1	0	0	1	4.2187e-06
		E009	0	0	0	0	0	0	0	0	0	0	0	0	1	0	0	1	4.2187e-06
		L028	0	0	0	0	0	0	0	0	0	0	0	0	1	0	0	1	4.2187e-06
		O990	0	0	0	0	0	0	0	0	0	0	0	0	1	0	0	1	4.2187e-06
		A449	0	0	0	0	0	0	0	0	0	0	0	0	1	0	0	1	4.2187e-06
		D177	0	0	0	0	0	0	0	0	0	0	0	0	1	0	0	1	4.2187e-06
		M119	0	0	0	0	0	0	0	0	0	0	0	0	1	0	0	1	4.2187e-06
		Y442	0	0	0	0	0	0	0	0	0	0	0	0	1	0	0	1	4.2187e-06
		N202	0	0	0	0	0	0	0	0	0	0	0	0	1	0	0	1	4.2187e-06
		E678	0	0	0	0	0	0	0	0	0	0	0	0	1	0	0	1	4.2187e-06
		O754	0	0	0	0	0	0	0	0	0	0	0	0	1	0	0	1	4.2187e-06
		N300	0	0	0	0	0	0	0	0	0	0	0	0	1	0	0	1	4.2187e-06
		C750	0	0	0	0	0	0	0	0	0	0	0	0	1	0	0	1	4.2187e-06
		M051	0	0	0	0	0	0	0	0	0	0	0	0	1	0	0	1	4.2187e-06
		A488	0	0	0	0	0	0	0	0	0	0	0	0	1	0	0	1	4.2187e-06
		A480	0	0	0	0	0	0	0	0	0	0	0	0	0	1	0	1	4.2187e-06
		Q392	0	0	0	0	0	0	0	0	0	0	0	0	0	1	0	1	4.2187e-06
		H709	0	0	0	0	0	0	0	0	0	0	0	0	0	1	0	1	4.2187e-06
		D34	0	0	0	0	0	0	0	0	0	0	0	0	0	1	0	1	4.2187e-06
		Q252	0	0	0	0	0	0	0	0	0	0	0	0	0	1	0	1	4.2187e-06
		N302	0	0	0	0	0	0	0	0	0	0	0	0	0	1	0	1	4.2187e-06
		E798	0	0	0	0	0	0	0	0	0	0	0	0	0	1	0	1	4.2187e-06
		M316	0	0	0	0	0	0	0	0	0	0	0	0	0	1	0	1	4.2187e-06
		O102	0	0	0	0	0	0	0	0	0	0	0	0	0	1	0	1	4.2187e-06
		E078	0	0	0	0	0	0	0	0	0	0	0	0	0	0	1	1	4.2187e-06
		X704	0	0	0	0	0	0	0	0	0	0	0	0	0	1	0	1	4.2187e-06
		M331	0	0	0	0	0	0	0	0	0	0	0	0	0	1	0	1	4.2187e-06
		M805	0	0	0	0	0	0	0	0	0	0	0	0	0	1	0	1	4.2187e-06
		N270	0	0	0	0	0	0	0	0	0	0	0	0	0	1	0	1	4.2187e-06
		G529	0	0	0	0	0	0	0	0	0	0	0	0	0	1	0	1	4.2187e-06
		M198	0	0	0	0	0	0	0	0	0	0	0	0	0	1	0	1	4.2187e-06
		O243	0	0	0	0	0	0	0	0	0	0	0	0	0	1	0	1	4.2187e-06
		A308	0	0	0	0	0	0	0	0	0	0	0	0	0	1	0	1	4.2187e-06
		B451	0	0	0	0	0	0	0	0	0	0	0	0	0	1	0	1	4.2187e-06
		A327	0	0	0	0	0	0	0	0	0	0	0	0	0	1	0	1	4.2187e-06
		K612	0	0	0	0	0	0	0	0	0	0	0	0	0	1	0	1	4.2187e-06
		E728	0	0	0	0	0	0	0	0	0	0	0	0	0	1	0	1	4.2187e-06
		C398	0	0	0	0	0	0	0	0	0	0	0	0	0	1	0	1	4.2187e-06
		N311	0	0	0	0	0	0	0	0	0	0	0	0	0	1	0	1	4.2187e-06
		V879	0	0	0	0	0	0	0	0	0	0	0	0	0	0	1	1	4.2187e-06
		K762	0	0	0	0	0	0	0	0	0	0	0	0	0	0	1	1	4.2187e-06
		M866	0	0	0	0	0	0	0	0	0	0	0	0	0	0	1	1	4.2187e-06
		C779	0	0	0	0	0	0	0	0	0	0	0	0	0	0	1	1	4.2187e-06
		E877	0	0	0	0	0	0	0	0	0	0	0	0	0	0	1	1	4.2187e-06
		B09	0	0	0	0	0	0	0	0	0	0	0	0	0	0	1	1	4.2187e-06
		Q303	0	0	0	0	0	0	0	0	0	0	0	0	0	0	1	1	4.2187e-06
		E852	0	0	0	0	0	0	0	0	0	0	0	0	0	0	1	1	4.2187e-06
		D472	0	0	0	0	0	0	0	0	0	0	0	0	0	0	1	1	4.2187e-06
		G968	0	0	0	0	0	0	0	0	0	0	0	0	0	0	1	1	4.2187e-06
		C505	0	0	0	0	0	0	0	0	0	0	0	0	0	0	1	1	4.2187e-06
		N839	0	0	0	0	0	0	0	0	0	0	0	0	0	0	1	1	4.2187e-06
		B818	0	0	0	0	0	0	0	0	0	0	0	0	0	0	1	1	4.2187e-06
		D484	0	0	0	0	0	0	0	0	0	0	0	0	0	0	1	1	4.2187e-06
		E031	0	0	0	0	0	0	0	0	0	0	0	0	0	0	1	1	4.2187e-06
		O244	0	0	0	0	0	0	0	0	0	0	0	0	0	0	1	1	4.2187e-06
		C61	0	0	0	0	0	0	0	0	0	0	0	0	0	0	0	0	0
		N40	0	0	0	0	0	0	0	0	0	0	0	0	0	0	0	0	0
		A059	0	0	0	0	0	0	0	0	0	0	0	0	0	0	0	0	0
		D66	0	0	0	0	0	0	0	0	0	0	0	0	0	0	0	0	0
		C629	0	0	0	0	0	0	0	0	0	0	0	0	0	0	0	0	0
		Q782	0	0	0	0	0	0	0	0	0	0	0	0	0	0	0	0	0
		W340	0	0	0	0	0	0	0	0	0	0	0	0	0	0	0	0	0
		Y280	0	0	0	0	0	0	0	0	0	0	0	0	0	0	0	0	0
		X699	0	0	0	0	0	0	0	0	0	0	0	0	0	0	0	0	0
		J628	0	0	0	0	0	0	0	0	0	0	0	0	0	0	0	0	0
		F988	0	0	0	0	0	0	0	0	0	0	0	0	0	0	0	0	0
		N328	0	0	0	0	0	0	0	0	0	0	0	0	0	0	0	0	0
		B203	0	0	0	0	0	0	0	0	0	0	0	0	0	0	0	0	0
		C728	0	0	0	0	0	0	0	0	0	0	0	0	0	0	0	0	0
		M889	0	0	0	0	0	0	0	0	0	0	0	0	0	0	0	0	0
		M100	0	0	0	0	0	0	0	0	0	0	0	0	0	0	0	0	0
		W690	0	0	0	0	0	0	0	0	0	0	0	0	0	0	0	0	0
		Y248	0	0	0	0	0	0	0	0	0	0	0	0	0	0	0	0	0
		W738	0	0	0	0	0	0	0	0	0	0	0	0	0	0	0	0	0
		I372	0	0	0	0	0	0	0	0	0	0	0	0	0	0	0	0	0
		C675	0	0	0	0	0	0	0	0	0	0	0	0	0	0	0	0	0
		P292	0	0	0	0	0	0	0	0	0	0	0	0	0	0	0	0	0
		Q238	0	0	0	0	0	0	0	0	0	0	0	0	0	0	0	0	0
		N429	0	0	0	0	0	0	0	0	0	0	0	0	0	0	0	0	0
		K311	0	0	0	0	0	0	0	0	0	0	0	0	0	0	0	0	0
		B178	0	0	0	0	0	0	0	0	0	0	0	0	0	0	0	0	0
		I600	0	0	0	0	0	0	0	0	0	0	0	0	0	0	0	0	0
		G728	0	0	0	0	0	0	0	0	0	0	0	0	0	0	0	0	0
		W126	0	0	0	0	0	0	0	0	0	0	0	0	0	0	0	0	0
		V284	0	0	0	0	0	0	0	0	0	0	0	0	0	0	0	0	0
		G721	0	0	0	0	0	0	0	0	0	0	0	0	0	0	0	0	0
		Y218	0	0	0	0	0	0	0	0	0	0	0	0	0	0	0	0	0
		W309	0	0	0	0	0	0	0	0	0	0	0	0	0	0	0	0	0
		M511	0	0	0	0	0	0	0	0	0	0	0	0	0	0	0	0	0
		X954	0	0	0	0	0	0	0	0	0	0	0	0	0	0	0	0	0
		X120	0	0	0	0	0	0	0	0	0	0	0	0	0	0	0	0	0
		W557	0	0	0	0	0	0	0	0	0	0	0	0	0	0	0	0	0
		K262	0	0	0	0	0	0	0	0	0	0	0	0	0	0	0	0	0
		W949	0	0	0	0	0	0	0	0	0	0	0	0	0	0	0	0	0
		F170	0	0	0	0	0	0	0	0	0	0	0	0	0	0	0	0	0
		K450	0	0	0	0	0	0	0	0	0	0	0	0	0	0	0	0	0
		A161	0	0	0	0	0	0	0	0	0	0	0	0	0	0	0	0	0
		B679	0	0	0	0	0	0	0	0	0	0	0	0	0	0	0	0	0
		B410	0	0	0	0	0	0	0	0	0	0	0	0	0	0	0	0	0
		W062	0	0	0	0	0	0	0	0	0	0	0	0	0	0	0	0	0
		K510	0	0	0	0	0	0	0	0	0	0	0	0	0	0	0	0	0
		C765	0	0	0	0	0	0	0	0	0	0	0	0	0	0	0	0	0
		W848	0	0	0	0	0	0	0	0	0	0	0	0	0	0	0	0	0
		V251	0	0	0	0	0	0	0	0	0	0	0	0	0	0	0	0	0
		G951	0	0	0	0	0	0	0	0	0	0	0	0	0	0	0	0	0
		E128	0	0	0	0	0	0	0	0	0	0	0	0	0	0	0	0	0
		V890	0	0	0	0	0	0	0	0	0	0	0	0	0	0	0	0	0
		G406	0	0	0	0	0	0	0	0	0	0	0	0	0	0	0	0	0
		Q255	0	0	0	0	0	0	0	0	0	0	0	0	0	0	0	0	0
		V499	0	0	0	0	0	0	0	0	0	0	0	0	0	0	0	0	0
		C089	0	0	0	0	0	0	0	0	0	0	0	0	0	0	0	0	0
		V294	0	0	0	0	0	0	0	0	0	0	0	0	0	0	0	0	0
		I461	0	0	0	0	0	0	0	0	0	0	0	0	0	0	0	0	0
		D470	0	0	0	0	0	0	0	0	0	0	0	0	0	0	0	0	0
		C328	0	0	0	0	0	0	0	0	0	0	0	0	0	0	0	0	0
		V475	0	0	0	0	0	0	0	0	0	0	0	0	0	0	0	0	0
		F119	0	0	0	0	0	0	0	0	0	0	0	0	0	0	0	0	0
		D400	0	0	0	0	0	0	0	0	0	0	0	0	0	0	0	0	0
		V911	0	0	0	0	0	0	0	0	0	0	0	0	0	0	0	0	0
		Q340	0	0	0	0	0	0	0	0	0	0	0	0	0	0	0	0	0
		K264	0	0	0	0	0	0	0	0	0	0	0	0	0	0	0	0	0
		I202	0	0	0	0	0	0	0	0	0	0	0	0	0	0	0	0	0
		I203	0	0	0	0	0	0	0	0	0	0	0	0	0	0	0	0	0
		I204	0	0	0	0	0	0	0	0	0	0	0	0	0	0	0	0	0
		I205	0	0	0	0	0	0	0	0	0	0	0	0	0	0	0	0	0
		I206	0	0	0	0	0	0	0	0	0	0	0	0	0	0	0	0	0
		I207	0	0	0	0	0	0	0	0	0	0	0	0	0	0	0	0	0
		I215	0	0	0	0	0	0	0	0	0	0	0	0	0	0	0	0	0
		I216	0	0	0	0	0	0	0	0	0	0	0	0	0	0	0	0	0
		I217	0	0	0	0	0	0	0	0	0	0	0	0	0	0	0	0	0
		I218	0	0	0	0	0	0	0	0	0	0	0	0	0	0	0	0	0
		I222	0	0	0	0	0	0	0	0	0	0	0	0	0	0	0	0	0
		I223	0	0	0	0	0	0	0	0	0	0	0	0	0	0	0	0	0
		I224	0	0	0	0	0	0	0	0	0	0	0	0	0	0	0	0	0
		I225	0	0	0	0	0	0	0	0	0	0	0	0	0	0	0	0	0
		I226	0	0	0	0	0	0	0	0	0	0	0	0	0	0	0	0	0
		I227	0	0	0	0	0	0	0	0	0	0	0	0	0	0	0	0	0
		I230	0	0	0	0	0	0	0	0	0	0	0	0	0	0	0	0	0
		I231	0	0	0	0	0	0	0	0	0	0	0	0	0	0	0	0	0
		I232	0	0	0	0	0	0	0	0	0	0	0	0	0	0	0	0	0
		I233	0	0	0	0	0	0	0	0	0	0	0	0	0	0	0	0	0
		I234	0	0	0	0	0	0	0	0	0	0	0	0	0	0	0	0	0
		I235	0	0	0	0	0	0	0	0	0	0	0	0	0	0	0	0	0
		I236	0	0	0	0	0	0	0	0	0	0	0	0	0	0	0	0	0
		I237	0	0	0	0	0	0	0	0	0	0	0	0	0	0	0	0	0
		I239	0	0	0	0	0	0	0	0	0	0	0	0	0	0	0	0	0
		I240	0	0	0	0	0	0	0	0	0	0	0	0	0	0	0	0	0
		I242	0	0	0	0	0	0	0	0	0	0	0	0	0	0	0	0	0
		I243	0	0	0	0	0	0	0	0	0	0	0	0	0	0	0	0	0
		I244	0	0	0	0	0	0	0	0	0	0	0	0	0	0	0	0	0
		I245	0	0	0	0	0	0	0	0	0	0	0	0	0	0	0	0	0
		I246	0	0	0	0	0	0	0	0	0	0	0	0	0	0	0	0	0
		I247	0	0	0	0	0	0	0	0	0	0	0	0	0	0	0	0	0
		I257	0	0	0	0	0	0	0	0	0	0	0	0	0	0	0	0	0
		I21	0	0	0	0	0	0	0	0	0	0	0	0	0	0	0	0	0
		I22	0	0	0	0	0	0	0	0	0	0	0	0	0	0	0	0	0
		I23	0	0	0	0	0	0	0	0	0	0	0	0	0	0	0	0	0
		I24	0	0	0	0	0	0	0	0	0	0	0	0	0	0	0	0	0
		I25	0	0	0	0	0	0	0	0	0	0	0	0	0	0	0	0	0
		C609	0	0	0	0	0	0	0	0	0	0	0	0	0	0	0	0	0
		E790	0	0	0	0	0	0	0	0	0	0	0	0	0	0	0	0	0
		Y818	0	0	0	0	0	0	0	0	0	0	0	0	0	0	0	0	0
		W544	0	0	0	0	0	0	0	0	0	0	0	0	0	0	0	0	0
		K622	0	0	0	0	0	0	0	0	0	0	0	0	0	0	0	0	0
		I723	0	0	0	0	0	0	0	0	0	0	0	0	0	0	0	0	0
		A305	0	0	0	0	0	0	0	0	0	0	0	0	0	0	0	0	0
		D291	0	0	0	0	0	0	0	0	0	0	0	0	0	0	0	0	0
		B169	0	0	0	0	0	0	0	0	0	0	0	0	0	0	0	0	0
		G407	0	0	0	0	0	0	0	0	0	0	0	0	0	0	0	0	0
		Y189	0	0	0	0	0	0	0	0	0	0	0	0	0	0	0	0	0
		X239	0	0	0	0	0	0	0	0	0	0	0	0	0	0	0	0	0
		B162	0	0	0	0	0	0	0	0	0	0	0	0	0	0	0	0	0
		J61	0	0	0	0	0	0	0	0	0	0	0	0	0	0	0	0	0
		W700	0	0	0	0	0	0	0	0	0	0	0	0	0	0	0	0	0
		F251	0	0	0	0	0	0	0	0	0	0	0	0	0	0	0	0	0
		I670	0	0	0	0	0	0	0	0	0	0	0	0	0	0	0	0	0
		J691	0	0	0	0	0	0	0	0	0	0	0	0	0	0	0	0	0
		W110	0	0	0	0	0	0	0	0	0	0	0	0	0	0	0	0	0
		P209	0	0	0	0	0	0	0	0	0	0	0	0	0	0	0	0	0
		W682	0	0	0	0	0	0	0	0	0	0	0	0	0	0	0	0	0
		V689	0	0	0	0	0	0	0	0	0	0	0	0	0	0	0	0	0
		K904	0	0	0	0	0	0	0	0	0	0	0	0	0	0	0	0	0
		D223	0	0	0	0	0	0	0	0	0	0	0	0	0	0	0	0	0
		K265	0	0	0	0	0	0	0	0	0	0	0	0	0	0	0	0	0
		F220	0	0	0	0	0	0	0	0	0	0	0	0	0	0	0	0	0
		V049	0	0	0	0	0	0	0	0	0	0	0	0	0	0	0	0	0
		Y099	0	0	0	0	0	0	0	0	0	0	0	0	0	0	0	0	0
		G255	0	0	0	0	0	0	0	0	0	0	0	0	0	0	0	0	0
		E739	0	0	0	0	0	0	0	0	0	0	0	0	0	0	0	0	0
		I370	0	0	0	0	0	0	0	0	0	0	0	0	0	0	0	0	0
		E831	0	0	0	0	0	0	0	0	0	0	0	0	0	0	0	0	0
		W559	0	0	0	0	0	0	0	0	0	0	0	0	0	0	0	0	0
		D331	0	0	0	0	0	0	0	0	0	0	0	0	0	0	0	0	0
		C320	0	0	0	0	0	0	0	0	0	0	0	0	0	0	0	0	0
		G913	0	0	0	0	0	0	0	0	0	0	0	0	0	0	0	0	0
		B085	0	0	0	0	0	0	0	0	0	0	0	0	0	0	0	0	0
		R571	0	0	0	0	0	0	0	0	0	0	0	0	0	0	0	0	0
		V134	0	0	0	0	0	0	0	0	0	0	0	0	0	0	0	0	0
		C889	0	0	0	0	0	0	0	0	0	0	0	0	0	0	0	0	0
		Q203	0	0	0	0	0	0	0	0	0	0	0	0	0	0	0	0	0
		X959	0	0	0	0	0	0	0	0	0	0	0	0	0	0	0	0	0
		E750	0	0	0	0	0	0	0	0	0	0	0	0	0	0	0	0	0
		D640	0	0	0	0	0	0	0	0	0	0	0	0	0	0	0	0	0
		C782	0	0	0	0	0	0	0	0	0	0	0	0	0	0	0	0	0
		X990	0	0	0	0	0	0	0	0	0	0	0	0	0	0	0	0	0
		V485	0	0	0	0	0	0	0	0	0	0	0	0	0	0	0	0	0
		Y129	0	0	0	0	0	0	0	0	0	0	0	0	0	0	0	0	0
		C210	0	0	0	0	0	0	0	0	0	0	0	0	0	0	0	0	0
		F108	0	0	0	0	0	0	0	0	0	0	0	0	0	0	0	0	0
		W236	0	0	0	0	0	0	0	0	0	0	0	0	0	0	0	0	0
		B509	0	0	0	0	0	0	0	0	0	0	0	0	0	0	0	0	0
		B160	0	0	0	0	0	0	0	0	0	0	0	0	0	0	0	0	0
		I708	0	0	0	0	0	0	0	0	0	0	0	0	0	0	0	0	0
		W845	0	0	0	0	0	0	0	0	0	0	0	0	0	0	0	0	0
		C678	0	0	0	0	0	0	0	0	0	0	0	0	0	0	0	0	0
		C927	0	0	0	0	0	0	0	0	0	0	0	0	0	0	0	0	0
		D330	0	0	0	0	0	0	0	0	0	0	0	0	0	0	0	0	0
		B222	0	0	0	0	0	0	0	0	0	0	0	0	0	0	0	0	0
		G373	0	0	0	0	0	0	0	0	0	0	0	0	0	0	0	0	0
		X339	0	0	0	0	0	0	0	0	0	0	0	0	0	0	0	0	0
		B211	0	0	0	0	0	0	0	0	0	0	0	0	0	0	0	0	0
		Q054	0	0	0	0	0	0	0	0	0	0	0	0	0	0	0	0	0
		A300	0	0	0	0	0	0	0	0	0	0	0	0	0	0	0	0	0
		C492	0	0	0	0	0	0	0	0	0	0	0	0	0	0	0	0	0
		E740	0	0	0	0	0	0	0	0	0	0	0	0	0	0	0	0	0
		Q759	0	0	0	0	0	0	0	0	0	0	0	0	0	0	0	0	0
		N359	0	0	0	0	0	0	0	0	0	0	0	0	0	0	0	0	0
		I959	0	0	0	0	0	0	0	0	0	0	0	0	0	0	0	0	0
		C403	0	0	0	0	0	0	0	0	0	0	0	0	0	0	0	0	0
		I139	0	0	0	0	0	0	0	0	0	0	0	0	0	0	0	0	0
		G619	0	0	0	0	0	0	0	0	0	0	0	0	0	0	0	0	0
		C409	0	0	0	0	0	0	0	0	0	0	0	0	0	0	0	0	0
		B500	0	0	0	0	0	0	0	0	0	0	0	0	0	0	0	0	0
		X000	0	0	0	0	0	0	0	0	0	0	0	0	0	0	0	0	0
		K631	0	0	0	0	0	0	0	0	0	0	0	0	0	0	0	0	0
		M352	0	0	0	0	0	0	0	0	0	0	0	0	0	0	0	0	0
		M512	0	0	0	0	0	0	0	0	0	0	0	0	0	0	0	0	0
		N210	0	0	0	0	0	0	0	0	0	0	0	0	0	0	0	0	0
		K831	0	0	0	0	0	0	0	0	0	0	0	0	0	0	0	0	0
		W851	0	0	0	0	0	0	0	0	0	0	0	0	0	0	0	0	0
		A165	0	0	0	0	0	0	0	0	0	0	0	0	0	0	0	0	0
		F443	0	0	0	0	0	0	0	0	0	0	0	0	0	0	0	0	0
		Q231	0	0	0	0	0	0	0	0	0	0	0	0	0	0	0	0	0
		E160	0	0	0	0	0	0	0	0	0	0	0	0	0	0	0	0	0
		M418	0	0	0	0	0	0	0	0	0	0	0	0	0	0	0	0	0
		F191	0	0	0	0	0	0	0	0	0	0	0	0	0	0	0	0	0
		G249	0	0	0	0	0	0	0	0	0	0	0	0	0	0	0	0	0
		W839	0	0	0	0	0	0	0	0	0	0	0	0	0	0	0	0	0
		B551	0	0	0	0	0	0	0	0	0	0	0	0	0	0	0	0	0
		N139	0	0	0	0	0	0	0	0	0	0	0	0	0	0	0	0	0
		W877	0	0	0	0	0	0	0	0	0	0	0	0	0	0	0	0	0
		C251	0	0	0	0	0	0	0	0	0	0	0	0	0	0	0	0	0
		E038	0	0	0	0	0	0	0	0	0	0	0	0	0	0	0	0	0
		W648	0	0	0	0	0	0	0	0	0	0	0	0	0	0	0	0	0
		E248	0	0	0	0	0	0	0	0	0	0	0	0	0	0	0	0	0
		N419	0	0	0	0	0	0	0	0	0	0	0	0	0	0	0	0	0
		C795	0	0	0	0	0	0	0	0	0	0	0	0	0	0	0	0	0
		X474	0	0	0	0	0	0	0	0	0	0	0	0	0	0	0	0	0
		X208	0	0	0	0	0	0	0	0	0	0	0	0	0	0	0	0	0
		F163	0	0	0	0	0	0	0	0	0	0	0	0	0	0	0	0	0
		B206	0	0	0	0	0	0	0	0	0	0	0	0	0	0	0	0	0
		N134	0	0	0	0	0	0	0	0	0	0	0	0	0	0	0	0	0
		X970	0	0	0	0	0	0	0	0	0	0	0	0	0	0	0	0	0
		N422	0	0	0	0	0	0	0	0	0	0	0	0	0	0	0	0	0
		I490	0	0	0	0	0	0	0	0	0	0	0	0	0	0	0	0	0
		I722	0	0	0	0	0	0	0	0	0	0	0	0	0	0	0	0	0
		E033	0	0	0	0	0	0	0	0	0	0	0	0	0	0	0	0	0
		V239	0	0	0	0	0	0	0	0	0	0	0	0	0	0	0	0	0
		V265	0	0	0	0	0	0	0	0	0	0	0	0	0	0	0	0	0
		V899	0	0	0	0	0	0	0	0	0	0	0	0	0	0	0	0	0
		Q640	0	0	0	0	0	0	0	0	0	0	0	0	0	0	0	0	0
		Y219	0	0	0	0	0	0	0	0	0	0	0	0	0	0	0	0	0
		Y288	0	0	0	0	0	0	0	0	0	0	0	0	0	0	0	0	0
		N142	0	0	0	0	0	0	0	0	0	0	0	0	0	0	0	0	0
		B209	0	0	0	0	0	0	0	0	0	0	0	0	0	0	0	0	0
		X930	0	0	0	0	0	0	0	0	0	0	0	0	0	0	0	0	0
		A159	0	0	0	0	0	0	0	0	0	0	0	0	0	0	0	0	0
		J948	0	0	0	0	0	0	0	0	0	0	0	0	0	0	0	0	0
		Q330	0	0	0	0	0	0	0	0	0	0	0	0	0	0	0	0	0
		X500	0	0	0	0	0	0	0	0	0	0	0	0	0	0	0	0	0
		Q349	0	0	0	0	0	0	0	0	0	0	0	0	0	0	0	0	0
		X419	0	0	0	0	0	0	0	0	0	0	0	0	0	0	0	0	0
		C414	0	0	0	0	0	0	0	0	0	0	0	0	0	0	0	0	0
		F169	0	0	0	0	0	0	0	0	0	0	0	0	0	0	0	0	0
		I801	0	0	0	0	0	0	0	0	0	0	0	0	0	0	0	0	0
		F710	0	0	0	0	0	0	0	0	0	0	0	0	0	0	0	0	0
		F069	0	0	0	0	0	0	0	0	0	0	0	0	0	0	0	0	0
		G310	0	0	0	0	0	0	0	0	0	0	0	0	0	0	0	0	0
		Y344	0	0	0	0	0	0	0	0	0	0	0	0	0	0	0	0	0
		K500	0	0	0	0	0	0	0	0	0	0	0	0	0	0	0	0	0
		K742	0	0	0	0	0	0	0	0	0	0	0	0	0	0	0	0	0
		M068	0	0	0	0	0	0	0	0	0	0	0	0	0	0	0	0	0
		K632	0	0	0	0	0	0	0	0	0	0	0	0	0	0	0	0	0
		C447	0	0	0	0	0	0	0	0	0	0	0	0	0	0	0	0	0
		X952	0	0	0	0	0	0	0	0	0	0	0	0	0	0	0	0	0
		K599	0	0	0	0	0	0	0	0	0	0	0	0	0	0	0	0	0
		C829	0	0	0	0	0	0	0	0	0	0	0	0	0	0	0	0	0
		N368	0	0	0	0	0	0	0	0	0	0	0	0	0	0	0	0	0
		L059	0	0	0	0	0	0	0	0	0	0	0	0	0	0	0	0	0
		V124	0	0	0	0	0	0	0	0	0	0	0	0	0	0	0	0	0
		Y339	0	0	0	0	0	0	0	0	0	0	0	0	0	0	0	0	0
		A811	0	0	0	0	0	0	0	0	0	0	0	0	0	0	0	0	0
		I379	0	0	0	0	0	0	0	0	0	0	0	0	0	0	0	0	0
		C161	0	0	0	0	0	0	0	0	0	0	0	0	0	0	0	0	0
		J312	0	0	0	0	0	0	0	0	0	0	0	0	0	0	0	0	0
		V029	0	0	0	0	0	0	0	0	0	0	0	0	0	0	0	0	0
		A029	0	0	0	0	0	0	0	0	0	0	0	0	0	0	0	0	0
		K440	0	0	0	0	0	0	0	0	0	0	0	0	0	0	0	0	0
		C784	0	0	0	0	0	0	0	0	0	0	0	0	0	0	0	0	0
		J940	0	0	0	0	0	0	0	0	0	0	0	0	0	0	0	0	0
		E220	0	0	0	0	0	0	0	0	0	0	0	0	0	0	0	0	0
		P393	0	0	0	0	0	0	0	0	0	0	0	0	0	0	0	0	0
		N071	0	0	0	0	0	0	0	0	0	0	0	0	0	0	0	0	0
		D376	0	0	0	0	0	0	0	0	0	0	0	0	0	0	0	0	0
		L038	0	0	0	0	0	0	0	0	0	0	0	0	0	0	0	0	0
		C411	0	0	0	0	0	0	0	0	0	0	0	0	0	0	0	0	0
		F195	0	0	0	0	0	0	0	0	0	0	0	0	0	0	0	0	0
		G838	0	0	0	0	0	0	0	0	0	0	0	0	0	0	0	0	0
		V199	0	0	0	0	0	0	0	0	0	0	0	0	0	0	0	0	0
		I822	0	0	0	0	0	0	0	0	0	0	0	0	0	0	0	0	0
		D735	0	0	0	0	0	0	0	0	0	0	0	0	0	0	0	0	0
		B889	0	0	0	0	0	0	0	0	0	0	0	0	0	0	0	0	0
		W697	0	0	0	0	0	0	0	0	0	0	0	0	0	0	0	0	0
		F140	0	0	0	0	0	0	0	0	0	0	0	0	0	0	0	0	0
		E229	0	0	0	0	0	0	0	0	0	0	0	0	0	0	0	0	0
		Q200	0	0	0	0	0	0	0	0	0	0	0	0	0	0	0	0	0
		D370	0	0	0	0	0	0	0	0	0	0	0	0	0	0	0	0	0
		Q788	0	0	0	0	0	0	0	0	0	0	0	0	0	0	0	0	0
		V575	0	0	0	0	0	0	0	0	0	0	0	0	0	0	0	0	0
		B205	0	0	0	0	0	0	0	0	0	0	0	0	0	0	0	0	0
		W699	0	0	0	0	0	0	0	0	0	0	0	0	0	0	0	0	0
		B402	0	0	0	0	0	0	0	0	0	0	0	0	0	0	0	0	0
		Y084	0	0	0	0	0	0	0	0	0	0	0	0	0	0	0	0	0
		J418	0	0	0	0	0	0	0	0	0	0	0	0	0	0	0	0	0
		Q619	0	0	0	0	0	0	0	0	0	0	0	0	0	0	0	0	0
		D485	0	0	0	0	0	0	0	0	0	0	0	0	0	0	0	0	0
		J684	0	0	0	0	0	0	0	0	0	0	0	0	0	0	0	0	0
		C783	0	0	0	0	0	0	0	0	0	0	0	0	0	0	0	0	0
		E738	0	0	0	0	0	0	0	0	0	0	0	0	0	0	0	0	0
		F250	0	0	0	0	0	0	0	0	0	0	0	0	0	0	0	0	0
		C437	0	0	0	0	0	0	0	0	0	0	0	0	0	0	0	0	0
		F171	0	0	0	0	0	0	0	0	0	0	0	0	0	0	0	0	0
		D681	0	0	0	0	0	0	0	0	0	0	0	0	0	0	0	0	0
		M103	0	0	0	0	0	0	0	0	0	0	0	0	0	0	0	0	0
		M509	0	0	0	0	0	0	0	0	0	0	0	0	0	0	0	0	0
		E040	0	0	0	0	0	0	0	0	0	0	0	0	0	0	0	0	0
		A020	0	0	0	0	0	0	0	0	0	0	0	0	0	0	0	0	0
		P219	0	0	0	0	0	0	0	0	0	0	0	0	0	0	0	0	0
		C441	0	0	0	0	0	0	0	0	0	0	0	0	0	0	0	0	0
		V274	0	0	0	0	0	0	0	0	0	0	0	0	0	0	0	0	0
		E242	0	0	0	0	0	0	0	0	0	0	0	0	0	0	0	0	0
		Y850	0	0	0	0	0	0	0	0	0	0	0	0	0	0	0	0	0
		G713	0	0	0	0	0	0	0	0	0	0	0	0	0	0	0	0	0
		K401	0	0	0	0	0	0	0	0	0	0	0	0	0	0	0	0	0
		E649	0	0	0	0	0	0	0	0	0	0	0	0	0	0	0	0	0
		Y090	0	0	0	0	0	0	0	0	0	0	0	0	0	0	0	0	0
		W855	0	0	0	0	0	0	0	0	0	0	0	0	0	0	0	0	0
		V925	0	0	0	0	0	0	0	0	0	0	0	0	0	0	0	0	0
		C768	0	0	0	0	0	0	0	0	0	0	0	0	0	0	0	0	0
		W148	0	0	0	0	0	0	0	0	0	0	0	0	0	0	0	0	0
		Q875	0	0	0	0	0	0	0	0	0	0	0	0	0	0	0	0	0
		N009	0	0	0	0	0	0	0	0	0	0	0	0	0	0	0	0	0
		C945	0	0	0	0	0	0	0	0	0	0	0	0	0	0	0	0	0
		Q201	0	0	0	0	0	0	0	0	0	0	0	0	0	0	0	0	0
		X641	0	0	0	0	0	0	0	0	0	0	0	0	0	0	0	0	0
		Q282	0	0	0	0	0	0	0	0	0	0	0	0	0	0	0	0	0
		X334	0	0	0	0	0	0	0	0	0	0	0	0	0	0	0	0	0
		A819	0	0	0	0	0	0	0	0	0	0	0	0	0	0	0	0	0
		D371	0	0	0	0	0	0	0	0	0	0	0	0	0	0	0	0	0
		G451	0	0	0	0	0	0	0	0	0	0	0	0	0	0	0	0	0
		N498	0	0	0	0	0	0	0	0	0	0	0	0	0	0	0	0	0
		A490	0	0	0	0	0	0	0	0	0	0	0	0	0	0	0	0	0
		X850	0	0	0	0	0	0	0	0	0	0	0	0	0	0	0	0	0
		A304	0	0	0	0	0	0	0	0	0	0	0	0	0	0	0	0	0
		J153	0	0	0	0	0	0	0	0	0	0	0	0	0	0	0	0	0
		D239	0	0	0	0	0	0	0	0	0	0	0	0	0	0	0	0	0
		F439	0	0	0	0	0	0	0	0	0	0	0	0	0	0	0	0	0
		W747	0	0	0	0	0	0	0	0	0	0	0	0	0	0	0	0	0
		C319	0	0	0	0	0	0	0	0	0	0	0	0	0	0	0	0	0
		K281	0	0	0	0	0	0	0	0	0	0	0	0	0	0	0	0	0
		K738	0	0	0	0	0	0	0	0	0	0	0	0	0	0	0	0	0
		Q278	0	0	0	0	0	0	0	0	0	0	0	0	0	0	0	0	0
		P269	0	0	0	0	0	0	0	0	0	0	0	0	0	0	0	0	0
		Y451	0	0	0	0	0	0	0	0	0	0	0	0	0	0	0	0	0
		I692	0	0	0	0	0	0	0	0	0	0	0	0	0	0	0	0	0
		Y140	0	0	0	0	0	0	0	0	0	0	0	0	0	0	0	0	0
		J931	0	0	0	0	0	0	0	0	0	0	0	0	0	0	0	0	0
		M899	0	0	0	0	0	0	0	0	0	0	0	0	0	0	0	0	0
		Q336	0	0	0	0	0	0	0	0	0	0	0	0	0	0	0	0	0
		F788	0	0	0	0	0	0	0	0	0	0	0	0	0	0	0	0	0
		V182	0	0	0	0	0	0	0	0	0	0	0	0	0	0	0	0	0
		E500	0	0	0	0	0	0	0	0	0	0	0	0	0	0	0	0	0
		V496	0	0	0	0	0	0	0	0	0	0	0	0	0	0	0	0	0
		C435	0	0	0	0	0	0	0	0	0	0	0	0	0	0	0	0	0
		C602	0	0	0	0	0	0	0	0	0	0	0	0	0	0	0	0	0
		K628	0	0	0	0	0	0	0	0	0	0	0	0	0	0	0	0	0
		C469	0	0	0	0	0	0	0	0	0	0	0	0	0	0	0	0	0
		C091	0	0	0	0	0	0	0	0	0	0	0	0	0	0	0	0	0
		C914	0	0	0	0	0	0	0	0	0	0	0	0	0	0	0	0	0
		V280	0	0	0	0	0	0	0	0	0	0	0	0	0	0	0	0	0
		V693	0	0	0	0	0	0	0	0	0	0	0	0	0	0	0	0	0
		W182	0	0	0	0	0	0	0	0	0	0	0	0	0	0	0	0	0
		M45	0	0	0	0	0	0	0	0	0	0	0	0	0	0	0	0	0
		I408	0	0	0	0	0	0	0	0	0	0	0	0	0	0	0	0	0
		V904	0	0	0	0	0	0	0	0	0	0	0	0	0	0	0	0	0
		F410	0	0	0	0	0	0	0	0	0	0	0	0	0	0	0	0	0
		W169	0	0	0	0	0	0	0	0	0	0	0	0	0	0	0	0	0
		V902	0	0	0	0	0	0	0	0	0	0	0	0	0	0	0	0	0
		K740	0	0	0	0	0	0	0	0	0	0	0	0	0	0	0	0	0
		W854	0	0	0	0	0	0	0	0	0	0	0	0	0	0	0	0	0
		E749	0	0	0	0	0	0	0	0	0	0	0	0	0	0	0	0	0
		X934	0	0	0	0	0	0	0	0	0	0	0	0	0	0	0	0	0
		M622	0	0	0	0	0	0	0	0	0	0	0	0	0	0	0	0	0
		X848	0	0	0	0	0	0	0	0	0	0	0	0	0	0	0	0	0
		Y636	0	0	0	0	0	0	0	0	0	0	0	0	0	0	0	0	0
		D043	0	0	0	0	0	0	0	0	0	0	0	0	0	0	0	0	0
		E722	0	0	0	0	0	0	0	0	0	0	0	0	0	0	0	0	0
		K520	0	0	0	0	0	0	0	0	0	0	0	0	0	0	0	0	0
		Q917	0	0	0	0	0	0	0	0	0	0	0	0	0	0	0	0	0
		K271	0	0	0	0	0	0	0	0	0	0	0	0	0	0	0	0	0
		F118	0	0	0	0	0	0	0	0	0	0	0	0	0	0	0	0	0
		W749	0	0	0	0	0	0	0	0	0	0	0	0	0	0	0	0	0
		I470	0	0	0	0	0	0	0	0	0	0	0	0	0	0	0	0	0
		P969	0	0	0	0	0	0	0	0	0	0	0	0	0	0	0	0	0
		M513	0	0	0	0	0	0	0	0	0	0	0	0	0	0	0	0	0
		C150	0	0	0	0	0	0	0	0	0	0	0	0	0	0	0	0	0
		Q878	0	0	0	0	0	0	0	0	0	0	0	0	0	0	0	0	0
		X452	0	0	0	0	0	0	0	0	0	0	0	0	0	0	0	0	0
		G600	0	0	0	0	0	0	0	0	0	0	0	0	0	0	0	0	0
		C268	0	0	0	0	0	0	0	0	0	0	0	0	0	0	0	0	0
		X099	0	0	0	0	0	0	0	0	0	0	0	0	0	0	0	0	0
		F449	0	0	0	0	0	0	0	0	0	0	0	0	0	0	0	0	0
		K603	0	0	0	0	0	0	0	0	0	0	0	0	0	0	0	0	0
		A562	0	0	0	0	0	0	0	0	0	0	0	0	0	0	0	0	0
		N490	0	0	0	0	0	0	0	0	0	0	0	0	0	0	0	0	0
		G418	0	0	0	0	0	0	0	0	0	0	0	0	0	0	0	0	0
		Q872	0	0	0	0	0	0	0	0	0	0	0	0	0	0	0	0	0
		F115	0	0	0	0	0	0	0	0	0	0	0	0	0	0	0	0	0
		D510	0	0	0	0	0	0	0	0	0	0	0	0	0	0	0	0	0
		X202	0	0	0	0	0	0	0	0	0	0	0	0	0	0	0	0	0
		X650	0	0	0	0	0	0	0	0	0	0	0	0	0	0	0	0	0
		F148	0	0	0	0	0	0	0	0	0	0	0	0	0	0	0	0	0
		J385	0	0	0	0	0	0	0	0	0	0	0	0	0	0	0	0	0
		W866	0	0	0	0	0	0	0	0	0	0	0	0	0	0	0	0	0
		K627	0	0	0	0	0	0	0	0	0	0	0	0	0	0	0	0	0
		X232	0	0	0	0	0	0	0	0	0	0	0	0	0	0	0	0	0
		B332	0	0	0	0	0	0	0	0	0	0	0	0	0	0	0	0	0
		X799	0	0	0	0	0	0	0	0	0	0	0	0	0	0	0	0	0
		A267	0	0	0	0	0	0	0	0	0	0	0	0	0	0	0	0	0
		X097	0	0	0	0	0	0	0	0	0	0	0	0	0	0	0	0	0
		V295	0	0	0	0	0	0	0	0	0	0	0	0	0	0	0	0	0
		V189	0	0	0	0	0	0	0	0	0	0	0	0	0	0	0	0	0
		X279	0	0	0	0	0	0	0	0	0	0	0	0	0	0	0	0	0
		X479	0	0	0	0	0	0	0	0	0	0	0	0	0	0	0	0	0
		D159	0	0	0	0	0	0	0	0	0	0	0	0	0	0	0	0	0
		K623	0	0	0	0	0	0	0	0	0	0	0	0	0	0	0	0	0
		C401	0	0	0	0	0	0	0	0	0	0	0	0	0	0	0	0	0
		J391	0	0	0	0	0	0	0	0	0	0	0	0	0	0	0	0	0
		V849	0	0	0	0	0	0	0	0	0	0	0	0	0	0	0	0	0
		A89	0	0	0	0	0	0	0	0	0	0	0	0	0	0	0	0	0
		W864	0	0	0	0	0	0	0	0	0	0	0	0	0	0	0	0	0
		C222	0	0	0	0	0	0	0	0	0	0	0	0	0	0	0	0	0
		F252	0	0	0	0	0	0	0	0	0	0	0	0	0	0	0	0	0
		W297	0	0	0	0	0	0	0	0	0	0	0	0	0	0	0	0	0
		X508	0	0	0	0	0	0	0	0	0	0	0	0	0	0	0	0	0
		X250	0	0	0	0	0	0	0	0	0	0	0	0	0	0	0	0	0
		B409	0	0	0	0	0	0	0	0	0	0	0	0	0	0	0	0	0
		V244	0	0	0	0	0	0	0	0	0	0	0	0	0	0	0	0	0
		I010	0	0	0	0	0	0	0	0	0	0	0	0	0	0	0	0	0
		C254	0	0	0	0	0	0	0	0	0	0	0	0	0	0	0	0	0
		Y079	0	0	0	0	0	0	0	0	0	0	0	0	0	0	0	0	0
		E754	0	0	0	0	0	0	0	0	0	0	0	0	0	0	0	0	0
		N303	0	0	0	0	0	0	0	0	0	0	0	0	0	0	0	0	0
		C630	0	0	0	0	0	0	0	0	0	0	0	0	0	0	0	0	0
		I440	0	0	0	0	0	0	0	0	0	0	0	0	0	0	0	0	0
		K400	0	0	0	0	0	0	0	0	0	0	0	0	0	0	0	0	0
		J851	0	0	0	0	0	0	0	0	0	0	0	0	0	0	0	0	0
		W139	0	0	0	0	0	0	0	0	0	0	0	0	0	0	0	0	0
		W874	0	0	0	0	0	0	0	0	0	0	0	0	0	0	0	0	0
		G062	0	0	0	0	0	0	0	0	0	0	0	0	0	0	0	0	0
		V144	0	0	0	0	0	0	0	0	0	0	0	0	0	0	0	0	0
		V102	0	0	0	0	0	0	0	0	0	0	0	0	0	0	0	0	0
		A058	0	0	0	0	0	0	0	0	0	0	0	0	0	0	0	0	0
		Y210	0	0	0	0	0	0	0	0	0	0	0	0	0	0	0	0	0
		B028	0	0	0	0	0	0	0	0	0	0	0	0	0	0	0	0	0
		M358	0	0	0	0	0	0	0	0	0	0	0	0	0	0	0	0	0
		Y319	0	0	0	0	0	0	0	0	0	0	0	0	0	0	0	0	0
		M303	0	0	0	0	0	0	0	0	0	0	0	0	0	0	0	0	0
		C917	0	0	0	0	0	0	0	0	0	0	0	0	0	0	0	0	0
		D461	0	0	0	0	0	0	0	0	0	0	0	0	0	0	0	0	0
		C059	0	0	0	0	0	0	0	0	0	0	0	0	0	0	0	0	0
		C241	0	0	0	0	0	0	0	0	0	0	0	0	0	0	0	0	0
		G804	0	0	0	0	0	0	0	0	0	0	0	0	0	0	0	0	0
		Q242	0	0	0	0	0	0	0	0	0	0	0	0	0	0	0	0	0
		I611	0	0	0	0	0	0	0	0	0	0	0	0	0	0	0	0	0
		K508	0	0	0	0	0	0	0	0	0	0	0	0	0	0	0	0	0
		P229	0	0	0	0	0	0	0	0	0	0	0	0	0	0	0	0	0
		V905	0	0	0	0	0	0	0	0	0	0	0	0	0	0	0	0	0
		M518	0	0	0	0	0	0	0	0	0	0	0	0	0	0	0	0	0
		X780	0	0	0	0	0	0	0	0	0	0	0	0	0	0	0	0	0
		X958	0	0	0	0	0	0	0	0	0	0	0	0	0	0	0	0	0
		Q234	0	0	0	0	0	0	0	0	0	0	0	0	0	0	0	0	0
		X979	0	0	0	0	0	0	0	0	0	0	0	0	0	0	0	0	0
		A270	0	0	0	0	0	0	0	0	0	0	0	0	0	0	0	0	0
		C838	0	0	0	0	0	0	0	0	0	0	0	0	0	0	0	0	0
		W142	0	0	0	0	0	0	0	0	0	0	0	0	0	0	0	0	0
		Y004	0	0	0	0	0	0	0	0	0	0	0	0	0	0	0	0	0
		X338	0	0	0	0	0	0	0	0	0	0	0	0	0	0	0	0	0
		A430	0	0	0	0	0	0	0	0	0	0	0	0	0	0	0	0	0
		A160	0	0	0	0	0	0	0	0	0	0	0	0	0	0	0	0	0
		G800	0	0	0	0	0	0	0	0	0	0	0	0	0	0	0	0	0
		A99	0	0	0	0	0	0	0	0	0	0	0	0	0	0	0	0	0
		B49	0	0	0	0	0	0	0	0	0	0	0	0	0	0	0	0	0
		V184	0	0	0	0	0	0	0	0	0	0	0	0	0	0	0	0	0
		M308	0	0	0	0	0	0	0	0	0	0	0	0	0	0	0	0	0
		K633	0	0	0	0	0	0	0	0	0	0	0	0	0	0	0	0	0
		V942	0	0	0	0	0	0	0	0	0	0	0	0	0	0	0	0	0
		N171	0	0	0	0	0	0	0	0	0	0	0	0	0	0	0	0	0
		V536	0	0	0	0	0	0	0	0	0	0	0	0	0	0	0	0	0
		N140	0	0	0	0	0	0	0	0	0	0	0	0	0	0	0	0	0
		C781	0	0	0	0	0	0	0	0	0	0	0	0	0	0	0	0	0
		E721	0	0	0	0	0	0	0	0	0	0	0	0	0	0	0	0	0
		C153	0	0	0	0	0	0	0	0	0	0	0	0	0	0	0	0	0
		C495	0	0	0	0	0	0	0	0	0	0	0	0	0	0	0	0	0
		J386	0	0	0	0	0	0	0	0	0	0	0	0	0	0	0	0	0
		E349	0	0	0	0	0	0	0	0	0	0	0	0	0	0	0	0	0
		X899	0	0	0	0	0	0	0	0	0	0	0	0	0	0	0	0	0
		G603	0	0	0	0	0	0	0	0	0	0	0	0	0	0	0	0	0
		C171	0	0	0	0	0	0	0	0	0	0	0	0	0	0	0	0	0
		N394	0	0	0	0	0	0	0	0	0	0	0	0	0	0	0	0	0
		L029	0	0	0	0	0	0	0	0	0	0	0	0	0	0	0	0	0
		V877	0	0	0	0	0	0	0	0	0	0	0	0	0	0	0	0	0
		X622	0	0	0	0	0	0	0	0	0	0	0	0	0	0	0	0	0
		A542	0	0	0	0	0	0	0	0	0	0	0	0	0	0	0	0	0
		E309	0	0	0	0	0	0	0	0	0	0	0	0	0	0	0	0	0
		B020	0	0	0	0	0	0	0	0	0	0	0	0	0	0	0	0	0
		D352	0	0	0	0	0	0	0	0	0	0	0	0	0	0	0	0	0
		N251	0	0	0	0	0	0	0	0	0	0	0	0	0	0	0	0	0
		I604	0	0	0	0	0	0	0	0	0	0	0	0	0	0	0	0	0
		F159	0	0	0	0	0	0	0	0	0	0	0	0	0	0	0	0	0
		A929	0	0	0	0	0	0	0	0	0	0	0	0	0	0	0	0	0
		P239	0	0	0	0	0	0	0	0	0	0	0	0	0	0	0	0	0
		B469	0	0	0	0	0	0	0	0	0	0	0	0	0	0	0	0	0
		D460	0	0	0	0	0	0	0	0	0	0	0	0	0	0	0	0	0
		J634	0	0	0	0	0	0	0	0	0	0	0	0	0	0	0	0	0
		I889	0	0	0	0	0	0	0	0	0	0	0	0	0	0	0	0	0
		W154	0	0	0	0	0	0	0	0	0	0	0	0	0	0	0	0	0
		I131	0	0	0	0	0	0	0	0	0	0	0	0	0	0	0	0	0
		B341	0	0	0	0	0	0	0	0	0	0	0	0	0	0	0	0	0
		J320	0	0	0	0	0	0	0	0	0	0	0	0	0	0	0	0	0
		P284	0	0	0	0	0	0	0	0	0	0	0	0	0	0	0	0	0
		Q061	0	0	0	0	0	0	0	0	0	0	0	0	0	0	0	0	0
		X490	0	0	0	0	0	0	0	0	0	0	0	0	0	0	0	0	0
		C461	0	0	0	0	0	0	0	0	0	0	0	0	0	0	0	0	0
		C158	0	0	0	0	0	0	0	0	0	0	0	0	0	0	0	0	0
		N201	0	0	0	0	0	0	0	0	0	0	0	0	0	0	0	0	0
		P243	0	0	0	0	0	0	0	0	0	0	0	0	0	0	0	0	0
		A609	0	0	0	0	0	0	0	0	0	0	0	0	0	0	0	0	0
		Y128	0	0	0	0	0	0	0	0	0	0	0	0	0	0	0	0	0
		J920	0	0	0	0	0	0	0	0	0	0	0	0	0	0	0	0	0
		V576	0	0	0	0	0	0	0	0	0	0	0	0	0	0	0	0	0
		C211	0	0	0	0	0	0	0	0	0	0	0	0	0	0	0	0	0
		E849	0	0	0	0	0	0	0	0	0	0	0	0	0	0	0	0	0
		X401	0	0	0	0	0	0	0	0	0	0	0	0	0	0	0	0	0
		X690	0	0	0	0	0	0	0	0	0	0	0	0	0	0	0	0	0
		V498	0	0	0	0	0	0	0	0	0	0	0	0	0	0	0	0	0
		W859	0	0	0	0	0	0	0	0	0	0	0	0	0	0	0	0	0
		N391	0	0	0	0	0	0	0	0	0	0	0	0	0	0	0	0	0
		F189	0	0	0	0	0	0	0	0	0	0	0	0	0	0	0	0	0
		F206	0	0	0	0	0	0	0	0	0	0	0	0	0	0	0	0	0
		C66	0	0	0	0	0	0	0	0	0	0	0	0	0	0	0	0	0
		W834	0	0	0	0	0	0	0	0	0	0	0	0	0	0	0	0	0
		X619	0	0	0	0	0	0	0	0	0	0	0	0	0	0	0	0	0
		X422	0	0	0	0	0	0	0	0	0	0	0	0	0	0	0	0	0
		I129	0	0	0	0	0	0	0	0	0	0	0	0	0	0	0	0	0
		G960	0	0	0	0	0	0	0	0	0	0	0	0	0	0	0	0	0
		X238	0	0	0	0	0	0	0	0	0	0	0	0	0	0	0	0	0
		D001	0	0	0	0	0	0	0	0	0	0	0	0	0	0	0	0	0
		C831	0	0	0	0	0	0	0	0	0	0	0	0	0	0	0	0	0
		N132	0	0	0	0	0	0	0	0	0	0	0	0	0	0	0	0	0
		K121	0	0	0	0	0	0	0	0	0	0	0	0	0	0	0	0	0
		Y712	0	0	0	0	0	0	0	0	0	0	0	0	0	0	0	0	0
		W875	0	0	0	0	0	0	0	0	0	0	0	0	0	0	0	0	0
		W178	0	0	0	0	0	0	0	0	0	0	0	0	0	0	0	0	0
		V119	0	0	0	0	0	0	0	0	0	0	0	0	0	0	0	0	0
		Y049	0	0	0	0	0	0	0	0	0	0	0	0	0	0	0	0	0
		X939	0	0	0	0	0	0	0	0	0	0	0	0	0	0	0	0	0
		Q893	0	0	0	0	0	0	0	0	0	0	0	0	0	0	0	0	0
		G92	0	0	0	0	0	0	0	0	0	0	0	0	0	0	0	0	0
		W149	0	0	0	0	0	0	0	0	0	0	0	0	0	0	0	0	0
		W867	0	0	0	0	0	0	0	0	0	0	0	0	0	0	0	0	0
		D698	0	0	0	0	0	0	0	0	0	0	0	0	0	0	0	0	0
		G219	0	0	0	0	0	0	0	0	0	0	0	0	0	0	0	0	0
		C65	0	0	0	0	0	0	0	0	0	0	0	0	0	0	0	0	0
		C138	0	0	0	0	0	0	0	0	0	0	0	0	0	0	0	0	0
		N509	0	0	0	0	0	0	0	0	0	0	0	0	0	0	0	0	0
		A401	0	0	0	0	0	0	0	0	0	0	0	0	0	0	0	0	0
		W079	0	0	0	0	0	0	0	0	0	0	0	0	0	0	0	0	0
		V922	0	0	0	0	0	0	0	0	0	0	0	0	0	0	0	0	0
		B333	0	0	0	0	0	0	0	0	0	0	0	0	0	0	0	0	0
		V435	0	0	0	0	0	0	0	0	0	0	0	0	0	0	0	0	0
		F129	0	0	0	0	0	0	0	0	0	0	0	0	0	0	0	0	0
		J352	0	0	0	0	0	0	0	0	0	0	0	0	0	0	0	0	0
		B238	0	0	0	0	0	0	0	0	0	0	0	0	0	0	0	0	0
		A182	0	0	0	0	0	0	0	0	0	0	0	0	0	0	0	0	0
		C039	0	0	0	0	0	0	0	0	0	0	0	0	0	0	0	0	0
		W868	0	0	0	0	0	0	0	0	0	0	0	0	0	0	0	0	0
		D593	0	0	0	0	0	0	0	0	0	0	0	0	0	0	0	0	0
		E853	0	0	0	0	0	0	0	0	0	0	0	0	0	0	0	0	0
		D531	0	0	0	0	0	0	0	0	0	0	0	0	0	0	0	0	0
		N130	0	0	0	0	0	0	0	0	0	0	0	0	0	0	0	0	0
		C163	0	0	0	0	0	0	0	0	0	0	0	0	0	0	0	0	0
		C33	0	0	0	0	0	0	0	0	0	0	0	0	0	0	0	0	0
		W838	0	0	0	0	0	0	0	0	0	0	0	0	0	0	0	0	0
		H700	0	0	0	0	0	0	0	0	0	0	0	0	0	0	0	0	0
		N110	0	0	0	0	0	0	0	0	0	0	0	0	0	0	0	0	0
		W860	0	0	0	0	0	0	0	0	0	0	0	0	0	0	0	0	0
		F239	0	0	0	0	0	0	0	0	0	0	0	0	0	0	0	0	0
		K226	0	0	0	0	0	0	0	0	0	0	0	0	0	0	0	0	0
		Q254	0	0	0	0	0	0	0	0	0	0	0	0	0	0	0	0	0
		V041	0	0	0	0	0	0	0	0	0	0	0	0	0	0	0	0	0
		Y290	0	0	0	0	0	0	0	0	0	0	0	0	0	0	0	0	0
		N320	0	0	0	0	0	0	0	0	0	0	0	0	0	0	0	0	0
		X207	0	0	0	0	0	0	0	0	0	0	0	0	0	0	0	0	0
		D151	0	0	0	0	0	0	0	0	0	0	0	0	0	0	0	0	0
		A411	0	0	0	0	0	0	0	0	0	0	0	0	0	0	0	0	0
		V445	0	0	0	0	0	0	0	0	0	0	0	0	0	0	0	0	0
		B059	0	0	0	0	0	0	0	0	0	0	0	0	0	0	0	0	0
		X425	0	0	0	0	0	0	0	0	0	0	0	0	0	0	0	0	0
		Y849	0	0	0	0	0	0	0	0	0	0	0	0	0	0	0	0	0
		X299	0	0	0	0	0	0	0	0	0	0	0	0	0	0	0	0	0
		Y289	0	0	0	0	0	0	0	0	0	0	0	0	0	0	0	0	0
		C696	0	0	0	0	0	0	0	0	0	0	0	0	0	0	0	0	0
		Q446	0	0	0	0	0	0	0	0	0	0	0	0	0	0	0	0	0
		X430	0	0	0	0	0	0	0	0	0	0	0	0	0	0	0	0	0
		N141	0	0	0	0	0	0	0	0	0	0	0	0	0	0	0	0	0
		G248	0	0	0	0	0	0	0	0	0	0	0	0	0	0	0	0	0
		I511	0	0	0	0	0	0	0	0	0	0	0	0	0	0	0	0	0
		Y169	0	0	0	0	0	0	0	0	0	0	0	0	0	0	0	0	0
		K669	0	0	0	0	0	0	0	0	0	0	0	0	0	0	0	0	0
		X480	0	0	0	0	0	0	0	0	0	0	0	0	0	0	0	0	0
		V534	0	0	0	0	0	0	0	0	0	0	0	0	0	0	0	0	0
		W788	0	0	0	0	0	0	0	0	0	0	0	0	0	0	0	0	0
		F141	0	0	0	0	0	0	0	0	0	0	0	0	0	0	0	0	0
		L032	0	0	0	0	0	0	0	0	0	0	0	0	0	0	0	0	0
		W691	0	0	0	0	0	0	0	0	0	0	0	0	0	0	0	0	0
		W013	0	0	0	0	0	0	0	0	0	0	0	0	0	0	0	0	0
		B699	0	0	0	0	0	0	0	0	0	0	0	0	0	0	0	0	0
		F059	0	0	0	0	0	0	0	0	0	0	0	0	0	0	0	0	0
		C839	0	0	0	0	0	0	0	0	0	0	0	0	0	0	0	0	0
		W869	0	0	0	0	0	0	0	0	0	0	0	0	0	0	0	0	0
		E291	0	0	0	0	0	0	0	0	0	0	0	0	0	0	0	0	0
		I612	0	0	0	0	0	0	0	0	0	0	0	0	0	0	0	0	0
		E882	0	0	0	0	0	0	0	0	0	0	0	0	0	0	0	0	0
		M471	0	0	0	0	0	0	0	0	0	0	0	0	0	0	0	0	0
		C759	0	0	0	0	0	0	0	0	0	0	0	0	0	0	0	0	0
		C301	0	0	0	0	0	0	0	0	0	0	0	0	0	0	0	0	0
		G908	0	0	0	0	0	0	0	0	0	0	0	0	0	0	0	0	0
		C772	0	0	0	0	0	0	0	0	0	0	0	0	0	0	0	0	0
		J633	0	0	0	0	0	0	0	0	0	0	0	0	0	0	0	0	0
[truncated: 64 more rows]

## Sheet: North
		UCs	2006	2007	2008	2009	2010	2011	2012	2013	2014	2015	2016	2017	2018	2019	2020	TOTAL	%
		I219	1995	2140	2319	2451	2603	2775	2865	2770	3097	3249	3181	3384	3411	3432	2983	42655	0.675199
		E149	97	120	131	168	123	159	183	190	202	183	177	196	219	165	187	2500	0.0395732
		I251	93	69	87	99	52	91	90	123	107	111	98	115	94	93	65	1387	0.0219552
		I248	113	130	110	132	105	75	87	104	56	80	66	48	50	45	24	1225	0.0193909
		I255	56	52	58	55	56	66	85	82	71	77	84	111	92	101	62	1108	0.0175389
		I210	30	38	29	35	30	60	77	83	56	43	34	83	67	65	58	788	0.0124735
		I259	30	28	34	52	58	62	36	36	37	50	47	73	58	69	55	725	0.0114762
		E119	12	14	11	17	19	25	26	35	46	47	53	58	94	93	79	629	0.00995663
		I64	29	41	39	30	40	51	52	51	38	40	44	36	46	41	37	615	0.00973502
		J449	25	18	27	29	36	32	21	34	43	44	44	37	42	46	22	500	0.00791465
		E142	13	24	21	18	28	31	27	26	41	32	39	34	38	54	30	456	0.00721816
		E148	13	13	8	21	36	50	46	27	28	26	19	14	20	15	10	346	0.00547694
		J189	10	10	10	14	10	22	20	14	29	37	35	28	30	35	16	320	0.00506537
		I249	5	5	6	12	12	9	10	17	14	27	32	35	33	55	39	311	0.00492291
		I213	15	6	7	13	8	6	17	18	8	17	15	25	29	35	17	236	0.00373571
		B342	1	0	0	0	0	0	0	0	0	0	0	0	0	0	233	234	0.00370406
		E669	11	9	6	7	9	19	7	15	21	27	15	20	11	26	16	219	0.00346662
		I429	9	9	13	16	11	5	13	16	12	15	25	19	17	7	13	200	0.00316586
		I211	8	9	5	10	14	9	8	8	11	11	22	20	26	20	14	195	0.00308671
		I420	11	16	16	15	14	16	12	11	12	19	10	9	7	17	8	193	0.00305505
		F102	12	10	13	10	15	14	10	17	13	17	13	13	10	7	16	190	0.00300757
		I258	5	7	8	12	13	5	11	13	13	19	15	11	17	19	14	182	0.00288093
		I694	4	4	12	8	8	12	9	11	17	13	15	15	15	9	15	167	0.00264349
		N189	6	6	8	0	6	10	10	16	13	13	14	13	15	20	15	165	0.00261183
		I209	9	10	6	13	10	17	11	7	8	16	14	7	11	14	9	162	0.00256435
		E788	3	11	12	11	13	13	20	22	9	13	3	8	11	8	3	160	0.00253269
		N179	5	6	7	6	11	10	12	11	17	14	9	11	17	15	5	156	0.00246937
		E147	2	1	3	4	7	6	8	8	7	16	17	16	16	12	8	131	0.00207364
		E109	0	2	4	3	4	5	6	8	16	10	10	17	10	17	19	131	0.00207364
		I229	5	5	4	7	4	13	10	8	10	14	7	11	19	5	8	130	0.00205781
		E118	3	1	8	8	11	8	9	7	8	7	7	18	11	16	8	130	0.00205781
		J439	6	7	8	11	14	7	7	11	12	10	9	7	4	11	5	129	0.00204198
		J440	5	3	9	8	8	2	5	12	5	7	16	16	16	10	6	128	0.00202615
		E112	4	1	3	2	3	1	10	11	15	8	10	13	9	8	11	109	0.00172539
		E140	4	6	12	4	15	5	8	13	7	8	5	8	7	6	0	108	0.00170956
		C61	4	4	6	5	3	3	6	7	7	9	11	8	10	16	7	106	0.00167791
		E145	4	3	7	6	6	2	5	5	7	10	5	8	9	8	8	93	0.00147212
		I678	3	6	7	4	4	6	7	6	5	12	7	6	11	5	4	93	0.00147212
		I212	1	7	2	4	0	12	4	10	7	3	9	7	11	11	5	93	0.00147212
		I279	3	4	6	2	8	5	6	10	4	11	4	5	7	4	10	89	0.00140881
		B572	4	3	4	5	5	6	7	9	7	6	3	8	6	8	3	84	0.00132966
		J159	2	1	1	2	1	4	3	2	9	7	7	9	9	15	10	82	0.001298
		E780	5	1	3	10	6	7	2	8	8	3	5	6	8	4	4	80	0.00126634
		I214	8	2	2	1	2	1	3	2	5	8	12	13	7	4	7	77	0.00121886
		A419	6	1	4	4	1	5	2	4	7	9	7	7	5	7	4	73	0.00115554
		C349	4	2	9	3	2	4	6	9	0	7	2	6	7	9	3	73	0.00115554
		I10	3	2	2	6	9	2	2	2	8	3	8	7	8	4	1	67	0.00106056
		N19	2	4	3	5	6	4	8	1	5	6	5	1	5	7	4	66	0.00104473
		K746	1	2	5	2	5	8	2	2	4	7	6	5	3	8	5	65	0.0010289
		C169	1	6	4	1	2	4	2	2	8	6	8	4	5	5	5	63	0.000997246
		E117	0	1	2	2	4	2	1	1	8	7	7	6	8	8	6	63	0.000997246
		E668	4	3	7	1	4	10	10	3	4	3	4	1	2	1	5	62	0.000981416
		I422	4	2	3	4	5	10	5	4	5	5	2	0	2	4	6	61	0.000965587
		I350	2	4	4	2	4	1	3	1	5	3	5	6	4	5	9	58	0.000918099
		K703	3	5	4	2	4	4	2	2	5	2	4	5	7	2	6	57	0.00090227
		E146	2	3	1	1	8	12	6	1	5	2	4	1	4	3	4	57	0.00090227
		N390	1	1	3	1	4	3	3	9	3	6	5	5	4	8	1	57	0.00090227
		I250	2	1	1	3	5	0	4	5	8	7	7	4	4	4	1	56	0.000886441
		G309	0	1	0	1	1	4	2	5	3	3	6	6	7	7	10	56	0.000886441
		E141	1	0	3	4	3	3	3	3	4	3	3	7	7	7	3	54	0.000854782
		J459	2	8	8	4	2	1	5	5	2	1	2	3	5	3	2	53	0.000838953
		J180	2	5	9	3	3	5	4	0	2	3	1	2	9	3	1	52	0.000823123
		E108	0	1	2	1	3	0	2	3	11	7	4	4	4	5	5	52	0.000823123
		I619	1	2	7	3	2	1	7	7	2	5	4	3	3	0	4	51	0.000807294
		I252	6	5	11	11	11	6	0	0	0	0	0	0	0	0	0	50	0.000791465
		I269	1	1	0	4	4	3	2	2	6	4	9	5	2	3	4	50	0.000791465
		E785	0	1	0	2	2	2	3	3	10	6	4	4	6	6	1	50	0.000791465
		E110	0	3	1	1	2	1	3	4	5	4	2	4	3	10	5	48	0.000759806
		E107	0	2	5	4	2	2	5	0	6	2	4	2	6	5	2	47	0.000743977
		E789	0	0	2	1	1	3	1	2	4	1	2	9	7	11	3	47	0.000743977
		G20	2	1	0	2	0	2	3	1	6	4	4	5	4	3	5	42	0.00066483
		D649	0	2	3	1	2	3	3	0	3	7	2	1	4	6	5	42	0.00066483
		I421	0	1	2	0	1	1	0	2	1	2	4	8	2	9	9	42	0.00066483
		I710	1	3	1	2	2	4	3	2	3	3	3	0	3	4	3	37	0.000585684
		I256	0	2	1	6	1	2	1	0	1	8	4	4	2	3	2	37	0.000585684
		J841	2	2	1	1	0	6	1	2	1	1	1	5	5	4	4	36	0.000569855
		I428	2	1	1	1	1	0	1	1	0	1	2	1	6	10	8	36	0.000569855
		E116	1	0	1	0	2	1	2	1	1	2	1	8	5	3	6	34	0.000538196
		I270	2	0	2	1	2	4	2	1	4	3	2	6	2	1	1	33	0.000522367
		E100	1	1	4	0	2	2	1	1	4	5	1	2	3	4	1	32	0.000506537
		E102	1	0	3	1	0	1	4	2	0	0	4	4	5	1	6	32	0.000506537
		K859	0	0	0	2	1	2	0	2	6	3	3	3	3	1	6	32	0.000506537
		I254	5	1	2	1	3	1	0	0	5	1	2	4	1	3	2	31	0.000490708
		J441	0	1	1	1	1	0	2	0	0	1	1	5	2	9	7	31	0.000490708
		G409	1	4	1	0	3	3	2	2	1	0	3	0	4	3	3	30	0.000474879
		E115	0	0	0	0	0	1	0	0	3	2	2	6	4	6	6	30	0.000474879
		E889	0	2	1	2	0	3	0	2	1	6	1	2	1	6	3	30	0.000474879
		I119	0	0	0	1	0	1	0	1	2	2	3	5	6	5	4	30	0.000474879
		A09	2	5	2	2	2	0	0	2	2	2	4	2	2	2	0	29	0.00045905
		I253	1	3	1	1	0	2	4	2	6	3	4	1	0	1	0	29	0.00045905
		E111	1	1	0	0	1	0	1	5	3	1	3	7	2	3	1	29	0.00045905
		I719	1	0	1	3	2	2	4	2	1	3	6	0	1	1	1	28	0.00044322
		I639	1	0	1	1	2	1	4	1	0	0	2	4	3	7	0	27	0.000427391
		A162	1	1	3	1	1	3	0	2	1	2	2	2	2	3	3	27	0.000427391
		J188	1	0	1	1	2	3	0	2	3	3	4	2	4	1	0	27	0.000427391
		Q249	1	1	4	2	0	2	4	1	0	2	2	0	3	3	1	26	0.000411562
		C539	0	0	2	0	0	0	1	4	4	2	2	5	2	2	2	26	0.000411562
		I38	4	1	0	2	1	3	1	1	3	1	2	3	1	0	2	25	0.000395732
		I340	0	0	1	2	2	1	1	1	2	2	2	2	4	4	1	25	0.000395732
		D509	0	0	1	0	0	0	1	0	0	1	0	12	4	2	4	25	0.000395732
		F109	0	0	3	3	1	1	0	1	0	1	2	4	3	4	2	25	0.000395732
		E660	0	0	0	4	1	0	0	0	2	3	1	5	3	2	3	24	0.000379903
		K729	0	0	2	2	2	1	2	2	4	3	2	0	1	2	1	24	0.000379903
		J984	2	1	2	3	0	0	1	5	1	2	3	1	0	0	2	23	0.000364074
		Q245	0	3	0	6	1	0	5	5	0	0	1	0	2	0	0	23	0.000364074
		E46	3	1	1	1	1	0	2	1	0	0	2	2	1	5	2	22	0.000348245
		M321	1	0	1	1	0	4	1	0	2	1	6	1	1	3	0	22	0.000348245
		I110	1	3	2	1	3	2	1	0	2	1	1	4	1	0	0	22	0.000348245
		I426	0	2	1	1	0	2	0	0	6	4	2	1	2	0	1	22	0.000348245
		I714	0	0	3	2	1	0	3	3	2	0	1	1	1	2	3	22	0.000348245
		C229	0	1	1	0	0	1	1	4	2	1	3	2	2	3	1	22	0.000348245
		I739	1	2	2	0	0	1	1	0	4	1	2	1	1	2	3	21	0.000332415
		E059	0	1	3	2	2	4	0	1	1	2	0	0	3	0	2	21	0.000332415
		J690	0	0	1	1	1	1	3	2	2	2	1	2	2	1	2	21	0.000332415
		E136	0	0	0	0	0	0	0	0	0	0	1	6	13	1	0	21	0.000332415
		J448	0	2	0	2	1	1	2	2	3	2	1	2	2	0	0	20	0.000316586
		E105	0	0	1	0	1	1	3	2	2	0	1	3	0	5	1	20	0.000316586
		E782	0	1	1	1	0	0	0	2	0	4	1	2	5	1	2	20	0.000316586
		K922	2	1	4	1	0	1	1	0	1	1	1	3	2	0	1	19	0.000300757
		C509	1	3	0	1	0	3	1	1	1	3	0	1	1	1	2	19	0.000300757
		I228	0	2	0	2	0	1	0	2	5	1	2	3	0	0	1	19	0.000300757
		B24	0	1	1	0	0	1	0	0	0	3	1	4	4	2	2	19	0.000300757
		K920	2	1	1	0	3	2	2	0	1	0	0	2	1	1	2	18	0.000284927
		I713	1	2	0	2	1	2	3	0	1	1	1	0	1	1	2	18	0.000284927
		I509	0	1	1	0	0	1	0	1	1	3	2	3	0	1	4	18	0.000284927
		I351	2	1	1	4	0	0	0	1	1	2	1	0	1	1	2	17	0.000269098
		I609	1	0	0	1	0	1	0	1	1	1	1	3	2	3	2	17	0.000269098
		C329	0	1	1	1	2	2	1	0	0	1	1	1	3	3	0	17	0.000269098
		N40	0	2	1	0	3	2	0	0	1	1	0	1	3	1	2	17	0.000269098
		K550	2	0	1	1	4	1	0	2	0	2	2	0	0	0	1	16	0.000253269
		E43	2	0	0	0	0	1	0	1	2	3	1	2	1	2	1	16	0.000253269
		I698	0	1	5	0	1	0	1	0	0	1	1	3	1	0	2	16	0.000253269
		E86	0	1	3	1	0	2	1	3	1	2	0	2	0	0	0	16	0.000253269
		E101	0	1	2	2	0	1	2	1	0	0	0	1	2	2	2	16	0.000253269
		J989	0	3	1	0	3	0	1	2	1	0	0	1	1	0	3	16	0.000253269
		B570	0	1	3	0	0	1	1	5	0	1	2	2	0	0	0	16	0.000253269
		J90	2	1	1	2	0	0	0	0	1	0	2	0	3	3	0	15	0.000237439
		E162	1	1	0	0	2	2	0	2	1	0	1	1	3	0	1	15	0.000237439
		K769	0	0	1	2	1	0	0	2	1	0	3	1	1	2	1	15	0.000237439
		I802	1	1	2	1	2	1	1	0	1	0	1	0	2	1	0	14	0.00022161
		F101	0	1	0	0	0	2	1	0	1	0	1	1	0	7	0	14	0.00022161
		I059	2	1	2	1	0	1	1	2	1	0	0	1	0	0	1	13	0.000205781
		I220	1	1	2	1	0	0	0	1	1	0	1	2	2	0	1	13	0.000205781
		E039	0	2	1	0	0	0	1	2	1	0	1	1	3	0	1	13	0.000205781
		E106	0	1	1	0	0	1	0	1	1	3	1	1	1	0	2	13	0.000205781
		C20	0	0	0	1	1	2	1	0	1	0	1	3	1	2	0	13	0.000205781
		E139	0	0	0	1	0	0	1	0	4	2	2	1	1	1	0	13	0.000205781
		C679	2	0	1	0	1	0	0	1	0	4	2	0	1	0	0	12	0.000189952
		I221	1	3	0	1	1	0	1	1	0	1	2	1	0	0	0	12	0.000189952
		C159	0	0	0	1	0	1	1	4	0	1	1	0	0	2	1	12	0.000189952
		F100	0	1	1	3	1	2	1	0	0	1	0	1	0	1	0	12	0.000189952
		C64	0	0	0	0	0	1	1	3	1	0	2	1	0	1	2	12	0.000189952
		I359	2	0	2	1	0	2	0	0	2	1	0	0	1	0	0	11	0.000174122
		J42	1	1	0	1	1	0	0	1	2	1	1	0	2	0	0	11	0.000174122
		C189	1	0	0	0	0	1	0	0	0	0	2	0	3	2	2	11	0.000174122
		I319	1	2	1	0	0	1	1	2	1	0	0	1	0	1	0	11	0.000174122
		W199	1	1	0	2	0	2	1	2	0	1	1	0	0	0	0	11	0.000174122
		D689	1	0	1	2	1	1	1	1	0	0	1	1	0	0	1	11	0.000174122
		J988	0	1	0	1	3	2	0	0	1	0	0	0	0	0	3	11	0.000174122
		C259	0	0	0	2	0	1	1	0	0	2	0	1	0	1	3	11	0.000174122
		K704	0	0	1	2	1	1	1	1	0	0	3	1	0	0	0	11	0.000174122
		I718	0	0	1	2	2	0	0	1	0	0	1	2	1	0	1	11	0.000174122
		C449	0	0	0	0	0	1	1	1	0	0	2	3	2	1	0	11	0.000174122
		W180	0	0	0	2	0	0	0	0	0	0	1	1	4	2	1	11	0.000174122
		I271	0	0	1	2	0	0	2	1	3	0	1	1	0	0	0	11	0.000174122
		R092	0	0	0	0	2	1	0	1	2	0	0	0	5	0	0	11	0.000174122
		K85	2	3	5	0	0	0	0	0	0	0	0	0	0	0	0	10	0.000158293
		J46	2	0	0	2	0	1	0	2	0	1	0	0	2	0	0	10	0.000158293
		K701	2	0	1	0	0	0	0	1	1	1	1	2	0	1	0	10	0.000158293
		C80	1	0	0	1	0	0	1	1	1	3	1	1	0	0	0	10	0.000158293
		A46	1	0	0	0	0	0	0	2	0	0	1	2	3	0	1	10	0.000158293
		K566	1	1	0	2	1	0	2	0	3	0	0	0	0	0	0	10	0.000158293
		J985	1	2	2	1	4	0	0	0	0	0	0	0	0	0	0	10	0.000158293
		C760	0	0	0	0	1	0	0	1	0	0	1	0	4	2	1	10	0.000158293
		N180	0	0	1	0	0	0	1	0	0	2	2	2	2	0	0	10	0.000158293
		I050	0	1	0	1	3	1	0	0	0	1	0	1	2	0	0	10	0.000158293
		W010	0	0	0	0	0	0	0	0	1	3	0	1	2	3	0	10	0.000158293
		W189	0	0	0	0	1	1	0	0	2	0	1	1	3	1	0	10	0.000158293
		A309	0	2	0	1	0	2	0	1	0	0	0	0	1	1	2	10	0.000158293
		Q210	0	0	0	0	0	2	0	1	0	0	1	0	4	1	1	10	0.000158293
		X429	0	0	0	0	2	0	0	0	1	2	1	1	1	2	0	10	0.000158293
		E784	0	0	0	1	0	0	0	0	1	0	2	5	0	1	0	10	0.000158293
		E878	2	0	0	0	0	1	0	0	1	4	0	0	0	1	0	9	0.000142464
		C55	0	1	0	0	1	0	0	2	3	0	2	0	0	0	0	9	0.000142464
		I712	0	0	2	1	1	1	0	0	0	0	1	1	1	0	1	9	0.000142464
		I693	0	0	0	0	0	0	0	0	1	1	2	1	3	0	1	9	0.000142464
		I638	0	1	0	0	0	0	0	0	0	1	0	4	0	2	1	9	0.000142464
		K709	0	0	0	1	0	1	1	0	0	2	0	2	0	1	1	9	0.000142464
		W879	0	0	0	0	0	0	0	0	2	1	1	1	0	2	2	9	0.000142464
		J80	3	0	0	0	0	0	1	0	0	0	1	1	1	0	1	8	0.000126634
		M069	1	0	0	0	0	0	1	0	1	2	1	0	1	0	1	8	0.000126634
		K802	1	0	1	0	0	1	0	0	2	2	0	0	1	0	0	8	0.000126634
		G931	1	2	1	1	0	2	1	0	0	0	0	0	0	0	0	8	0.000126634
		K409	1	0	0	1	1	1	0	1	0	1	0	0	1	1	0	8	0.000126634
		W190	0	1	1	0	0	0	0	1	0	1	0	0	2	0	2	8	0.000126634
		N188	0	0	0	0	0	0	0	1	1	0	2	2	1	1	0	8	0.000126634
		E113	0	0	0	0	0	1	0	1	0	1	0	0	1	1	3	8	0.000126634
		J961	0	1	0	0	0	1	1	0	1	0	1	1	1	1	0	8	0.000126634
		V892	0	0	0	1	1	0	1	0	1	0	2	0	0	0	2	8	0.000126634
		X459	0	0	0	0	0	0	0	1	0	1	1	2	2	1	0	8	0.000126634
		Y832	2	1	0	0	0	0	2	0	0	0	1	1	0	0	0	7	0.000110805
		E144	1	0	0	0	3	1	0	0	0	0	0	1	0	1	0	7	0.000110805
		K767	1	0	0	1	0	0	0	0	0	3	0	1	1	0	0	7	0.000110805
		C900	0	0	0	0	1	0	1	1	0	0	0	1	3	0	0	7	0.000110805
		A169	0	0	1	0	0	1	1	2	0	0	0	1	1	0	0	7	0.000110805
		I671	0	0	0	1	0	1	0	2	1	0	1	0	1	0	0	7	0.000110805
		I349	0	0	0	0	0	1	1	0	0	3	1	0	0	1	0	7	0.000110805
		E138	0	0	0	1	1	1	0	0	0	1	0	0	0	2	1	7	0.000110805
		K259	0	1	0	1	1	1	0	1	0	0	0	0	0	1	1	7	0.000110805
		N289	0	2	0	0	1	1	1	1	0	0	0	0	0	0	1	7	0.000110805
		C719	0	0	1	0	0	0	0	0	0	2	1	0	0	1	2	7	0.000110805
		F106	0	1	1	2	0	0	1	0	0	2	0	0	0	0	0	7	0.000110805
		I81	0	0	1	2	0	1	0	1	0	0	1	0	0	1	0	7	0.000110805
		K851	0	0	0	0	0	0	0	2	1	1	0	0	0	2	1	7	0.000110805
		C710	1	0	0	0	0	0	0	1	0	0	0	1	2	1	0	6	9.49758e-05
		I679	1	0	0	0	0	0	0	1	1	0	1	0	0	0	2	6	9.49758e-05
		Q248	1	0	1	1	1	0	0	1	0	0	0	0	1	0	0	6	9.49758e-05
		B182	1	0	0	0	0	0	0	1	1	1	0	0	1	0	1	6	9.49758e-05
		K810	0	0	0	0	0	0	1	0	0	0	1	2	0	1	1	6	9.49758e-05
		K819	0	2	0	0	1	0	0	1	0	2	0	0	0	0	0	6	9.49758e-05
		M319	0	0	1	1	1	1	0	1	0	1	0	0	0	0	0	6	9.49758e-05
		C260	0	0	0	0	0	0	2	1	0	1	1	1	0	0	0	6	9.49758e-05
		I019	0	1	0	0	0	0	1	1	0	0	1	0	1	1	0	6	9.49758e-05
		V299	0	0	0	1	0	0	0	1	1	0	0	1	1	0	1	6	9.49758e-05
		I743	0	0	0	1	0	0	1	1	0	1	1	1	0	0	0	6	9.49758e-05
		G301	0	0	0	1	0	0	0	0	2	0	0	1	0	0	2	6	9.49758e-05
		N200	0	0	1	0	0	1	1	1	0	1	1	0	0	0	0	6	9.49758e-05
		N039	0	1	0	0	0	0	0	0	0	0	0	2	0	2	1	6	9.49758e-05
		D648	0	0	1	0	0	1	0	0	0	1	0	1	1	0	1	6	9.49758e-05
		C920	0	0	0	1	1	0	0	0	0	1	1	0	1	1	0	6	9.49758e-05
		C19	0	0	2	0	0	1	0	0	1	2	0	0	0	0	0	6	9.49758e-05
		I313	0	1	0	0	0	1	0	0	0	0	1	0	0	2	1	6	9.49758e-05
		J168	0	1	0	0	0	0	0	0	0	0	2	2	0	1	0	6	9.49758e-05
		A049	0	1	0	0	0	1	0	0	0	1	0	0	2	0	1	6	9.49758e-05
		Q909	0	0	0	0	0	0	2	0	1	0	0	2	0	1	0	6	9.49758e-05
		A418	0	0	0	0	1	0	0	0	0	2	0	0	1	2	0	6	9.49758e-05
		E872	0	0	0	0	0	1	2	0	0	1	1	0	0	1	0	6	9.49758e-05
		A483	0	0	0	0	0	0	0	0	0	2	0	0	0	3	1	6	9.49758e-05
		F192	0	0	0	0	0	1	1	0	0	0	0	1	1	1	1	6	9.49758e-05
		I260	1	0	0	0	2	0	0	0	0	1	0	0	0	0	1	5	7.91465e-05
		C780	1	0	0	0	1	1	1	0	0	0	0	0	1	0	0	5	7.91465e-05
		K579	1	0	0	0	0	1	0	1	1	0	0	0	1	0	0	5	7.91465e-05
		B199	1	1	0	1	0	0	0	1	0	0	0	0	0	0	1	5	7.91465e-05
		I672	0	1	0	1	1	0	0	0	0	1	0	0	1	0	0	5	7.91465e-05
		J40	0	1	0	0	1	1	0	0	0	2	0	0	0	0	0	5	7.91465e-05
		B575	0	1	0	0	2	1	0	0	1	0	0	0	0	0	0	5	7.91465e-05
		I424	0	0	1	0	0	1	0	0	1	1	0	1	0	0	0	5	7.91465e-05
		K403	0	0	0	0	1	0	0	0	0	1	0	0	1	1	1	5	7.91465e-05
		K295	0	0	0	0	0	0	1	1	1	0	0	0	1	1	0	5	7.91465e-05
		K570	0	0	0	0	0	0	0	0	0	3	0	0	0	1	1	5	7.91465e-05
		F103	0	0	0	0	0	1	0	1	0	0	0	1	1	0	1	5	7.91465e-05
		K808	0	0	0	0	0	0	0	0	0	0	1	1	2	0	1	5	7.91465e-05
		E049	0	1	0	0	1	1	0	1	0	0	0	0	0	1	0	5	7.91465e-05
		I089	0	0	0	0	0	1	1	0	1	0	0	0	0	1	1	5	7.91465e-05
		X420	0	0	0	0	0	0	0	2	1	0	0	1	1	0	0	5	7.91465e-05
		G122	0	0	0	0	1	0	1	0	0	0	2	0	0	0	1	5	7.91465e-05
		E104	0	0	2	0	0	1	0	0	1	0	0	0	0	0	1	5	7.91465e-05
		M349	0	0	0	0	0	1	0	0	2	1	0	0	0	0	1	5	7.91465e-05
		X424	0	0	0	0	0	0	0	0	0	1	1	2	0	0	1	5	7.91465e-05
		O100	2	0	0	0	0	0	0	0	0	0	1	0	1	0	0	4	6.33172e-05
		C798	2	0	0	1	0	1	0	0	0	0	0	0	0	0	0	4	6.33172e-05
		I674	1	0	0	0	0	1	0	0	0	0	0	2	0	0	0	4	6.33172e-05
		J64	1	0	0	1	0	0	1	0	0	0	0	1	0	0	0	4	6.33172e-05
		K469	1	1	0	0	0	0	0	1	0	0	0	0	0	1	0	4	6.33172e-05
		N170	1	0	0	0	0	0	0	2	0	0	0	0	0	0	1	4	6.33172e-05
		I011	1	1	0	0	0	0	0	0	0	1	0	0	0	0	1	4	6.33172e-05
		W698	0	0	1	0	0	0	0	0	1	0	1	0	0	0	1	4	6.33172e-05
		C220	0	0	0	0	0	0	1	0	1	0	1	1	0	0	0	4	6.33172e-05
		I803	0	1	1	0	0	1	0	0	0	0	1	0	0	0	0	4	6.33172e-05
		Y838	0	0	0	1	0	2	0	0	0	1	0	0	0	0	0	4	6.33172e-05
		K297	0	0	2	1	0	0	0	0	0	1	0	0	0	0	0	4	6.33172e-05
		K804	0	1	0	0	0	1	0	0	1	0	0	0	1	0	0	4	6.33172e-05
		E874	0	0	0	0	0	0	0	0	0	0	3	0	1	0	0	4	6.33172e-05
		I330	0	0	0	0	0	0	0	0	0	2	0	1	0	0	1	4	6.33172e-05
		G35	0	0	0	0	1	0	1	0	0	1	0	0	0	1	0	4	6.33172e-05
		E127	0	0	0	0	0	1	0	0	0	1	1	1	0	0	0	4	6.33172e-05
		D619	0	0	1	0	0	0	0	0	0	0	0	2	1	0	0	4	6.33172e-05
		D539	0	0	1	0	0	0	0	0	0	0	1	1	0	0	1	4	6.33172e-05
		D571	0	0	0	0	0	0	0	1	0	0	0	1	0	2	0	4	6.33172e-05
		I083	0	0	0	1	0	0	1	0	0	0	0	0	2	0	0	4	6.33172e-05
		A90	0	0	1	0	2	1	0	0	0	0	0	0	0	0	0	4	6.33172e-05
		A150	0	0	0	0	0	0	1	0	0	0	0	1	0	0	2	4	6.33172e-05
		I409	0	0	0	0	0	0	0	1	0	0	0	1	0	1	1	4	6.33172e-05
		K760	0	1	1	0	0	0	0	1	0	1	0	0	0	0	0	4	6.33172e-05
		I058	0	0	0	0	0	0	1	0	0	1	1	0	1	0	0	4	6.33172e-05
		J158	0	0	0	0	0	0	0	0	0	1	0	0	0	2	1	4	6.33172e-05
		C56	0	1	0	0	0	1	1	0	0	0	1	0	0	0	0	4	6.33172e-05
		E781	0	1	0	0	0	0	0	0	0	0	0	0	3	0	0	4	6.33172e-05
		E120	0	0	0	0	3	0	0	0	1	0	0	0	0	0	0	4	6.33172e-05
		I080	0	2	1	0	0	0	0	0	0	0	1	0	0	0	0	4	6.33172e-05
		I500	0	0	0	1	0	1	0	0	1	0	0	0	1	0	0	4	6.33172e-05
		E232	0	2	0	0	0	0	0	1	0	0	0	0	1	0	0	4	6.33172e-05
		V021	0	1	0	1	0	0	0	1	0	0	0	0	0	1	0	4	6.33172e-05
		O994	0	1	1	0	0	0	0	0	1	1	0	0	0	0	0	4	6.33172e-05
		J681	0	1	0	1	0	1	0	0	0	0	0	0	0	1	0	4	6.33172e-05
		N178	0	1	0	0	0	0	0	0	0	0	0	0	1	0	2	4	6.33172e-05
		A91	0	1	1	0	0	0	0	0	0	0	0	0	0	2	0	4	6.33172e-05
		X999	0	0	0	0	0	0	0	0	0	0	1	1	2	0	0	4	6.33172e-05
		I200	0	0	0	1	1	0	0	0	0	0	0	0	0	2	0	4	6.33172e-05
		C959	0	0	0	0	0	1	2	1	0	0	0	0	0	0	0	4	6.33172e-05
		V093	0	0	0	1	1	0	0	2	0	0	0	0	0	0	0	4	6.33172e-05
		B169	0	0	0	1	0	1	0	1	1	0	0	0	0	0	0	4	6.33172e-05
		C439	0	0	2	0	0	0	0	1	0	0	0	0	0	0	1	4	6.33172e-05
		C109	0	0	1	0	0	0	0	0	1	0	1	0	1	0	0	4	6.33172e-05
		C01	0	0	0	0	0	0	0	0	0	0	1	1	1	1	0	4	6.33172e-05
		I958	0	0	0	2	0	1	0	1	0	0	0	0	0	0	0	4	6.33172e-05
		X990	0	0	0	2	1	1	0	0	0	0	0	0	0	0	0	4	6.33172e-05
		Y129	0	0	0	1	0	0	0	2	1	0	0	0	0	0	0	4	6.33172e-05
		I728	0	0	0	1	0	0	0	0	0	0	0	1	2	0	0	4	6.33172e-05
		E137	0	0	0	0	0	0	0	0	0	0	1	0	0	3	0	4	6.33172e-05
		W192	0	0	0	0	2	0	0	0	1	1	0	0	0	0	0	4	6.33172e-05
		I519	0	0	0	0	0	0	0	0	0	1	0	0	2	1	0	4	6.33172e-05
		K290	1	0	0	0	0	0	1	0	0	0	0	0	0	1	0	3	4.74879e-05
		I281	1	0	0	0	0	0	0	0	1	0	0	1	0	0	0	3	4.74879e-05
		I425	1	0	0	0	1	0	0	0	0	1	0	0	0	0	0	3	4.74879e-05
		J939	1	1	0	0	1	0	0	0	0	0	0	0	0	0	0	3	4.74879e-05
		F172	0	0	1	0	0	1	0	0	0	1	0	0	0	0	0	3	4.74879e-05
		I358	0	0	1	0	1	0	0	0	1	0	0	0	0	0	0	3	4.74879e-05
		I711	0	0	0	1	1	0	0	1	0	0	0	0	0	0	0	3	4.74879e-05
		G405	0	0	0	0	2	0	0	0	0	0	0	0	0	0	1	3	4.74879e-05
		J969	0	0	0	0	0	1	0	0	0	0	0	1	1	0	0	3	4.74879e-05
		J22	0	0	0	2	0	0	1	0	0	0	0	0	0	0	0	3	4.74879e-05
		K861	0	0	0	0	1	0	0	1	1	0	0	0	0	0	0	3	4.74879e-05
		I950	0	0	0	1	0	0	0	1	0	0	0	0	0	1	0	3	4.74879e-05
		I201	0	0	0	0	0	1	0	0	1	1	0	0	0	0	0	3	4.74879e-05
		E786	0	1	0	0	0	0	0	1	1	0	0	0	0	0	0	3	4.74879e-05
		K750	0	1	1	0	0	0	0	0	0	0	0	0	0	1	0	3	4.74879e-05
		I339	0	0	0	0	1	0	0	0	0	0	0	0	1	1	0	3	4.74879e-05
		B92	0	0	0	1	0	1	1	0	0	0	0	0	0	0	0	3	4.74879e-05
		E880	0	0	0	0	0	0	0	0	0	2	1	0	0	0	0	3	4.74879e-05
		K860	0	0	1	0	1	0	0	0	0	0	1	0	0	0	0	3	4.74879e-05
		B208	0	0	1	0	0	0	1	0	0	1	0	0	0	0	0	3	4.74879e-05
		J181	0	0	0	0	0	0	0	0	0	0	1	0	0	1	1	3	4.74879e-05
		G934	0	0	0	0	0	0	0	1	0	0	0	0	0	1	1	3	4.74879e-05
		B159	0	1	0	0	0	0	0	1	0	0	1	0	0	0	0	3	4.74879e-05
		W870	0	0	0	1	0	0	1	0	0	0	0	0	0	1	0	3	4.74879e-05
		D469	0	1	0	0	0	0	1	0	1	0	0	0	0	0	0	3	4.74879e-05
		I709	0	0	0	0	0	0	0	0	0	0	2	0	0	0	1	3	4.74879e-05
		C761	0	0	0	0	0	1	0	0	0	0	0	0	1	1	0	3	4.74879e-05
		V499	0	0	0	0	0	1	0	0	0	0	2	0	0	0	0	3	4.74879e-05
		J849	0	0	0	0	0	0	1	0	0	0	1	0	0	1	0	3	4.74879e-05
		E143	0	0	0	1	0	0	1	0	0	0	0	0	0	1	0	3	4.74879e-05
		N12	0	1	0	0	0	0	0	1	0	0	0	0	1	0	0	3	4.74879e-05
		B54	0	1	0	1	0	0	1	0	0	0	0	0	0	0	0	3	4.74879e-05
		C609	0	0	0	0	0	1	0	0	0	0	0	1	0	1	0	3	4.74879e-05
		N10	0	0	0	0	0	0	1	0	0	0	0	0	0	1	1	3	4.74879e-05
		I278	0	0	1	0	0	0	0	0	0	0	0	2	0	0	0	3	4.74879e-05
		K720	0	0	0	0	0	0	0	1	0	0	1	1	0	0	0	3	4.74879e-05
		I716	0	0	0	0	1	0	0	1	0	0	0	0	0	1	0	3	4.74879e-05
		C249	0	0	0	0	0	0	1	0	0	0	1	0	0	1	0	3	4.74879e-05
		J129	0	0	0	1	0	0	0	0	0	0	0	0	0	0	2	3	4.74879e-05
		C549	0	0	0	0	0	0	1	0	1	1	0	0	0	0	0	3	4.74879e-05
		W179	0	0	0	0	0	0	0	0	0	0	0	0	2	1	0	3	4.74879e-05
		E876	0	0	1	0	0	0	0	1	0	0	0	1	0	0	0	3	4.74879e-05
		W184	0	0	1	0	0	0	0	1	0	0	0	1	0	0	0	3	4.74879e-05
		I071	0	0	1	0	0	0	0	0	0	0	0	1	0	1	0	3	4.74879e-05
		I120	0	0	1	0	0	0	1	0	0	0	0	0	1	0	0	3	4.74879e-05
		K460	0	0	0	0	1	0	0	0	0	1	0	0	0	1	0	3	4.74879e-05
		W019	0	0	0	0	1	1	0	0	0	0	0	1	0	0	0	3	4.74879e-05
		C819	0	0	0	1	0	0	1	1	0	0	0	0	0	0	0	3	4.74879e-05
		B227	0	0	0	0	0	0	0	0	0	2	1	0	0	0	0	3	4.74879e-05
		Q256	0	0	0	0	1	1	0	0	0	0	0	1	0	0	0	3	4.74879e-05
		N209	0	0	0	0	0	0	0	0	0	0	0	1	1	0	1	3	4.74879e-05
		Q213	0	0	0	1	0	0	0	0	0	0	1	0	1	0	0	3	4.74879e-05
		J110	0	0	0	1	0	0	0	0	0	0	0	0	2	0	0	3	4.74879e-05
		K850	0	0	0	1	1	0	0	0	0	0	0	1	0	0	0	3	4.74879e-05
		X950	0	0	0	1	0	0	1	1	0	0	0	0	0	0	0	3	4.74879e-05
		Q208	0	0	0	0	0	0	1	0	0	1	0	0	0	1	0	3	4.74879e-05
		A153	0	0	0	0	0	0	0	0	0	0	1	0	0	1	1	3	4.74879e-05
		I620	0	0	0	0	0	1	0	0	1	0	0	1	0	0	0	3	4.74879e-05
		C412	0	0	0	0	1	1	0	0	0	0	1	0	0	0	0	3	4.74879e-05
		N419	0	0	0	0	1	0	0	1	0	0	1	0	0	0	0	3	4.74879e-05
		K852	0	0	0	0	0	0	1	1	0	0	0	0	0	0	1	3	4.74879e-05
		A159	0	0	0	0	1	0	0	0	1	0	0	1	0	0	0	3	4.74879e-05
		D500	0	0	0	0	0	0	0	0	0	0	0	2	0	0	1	3	4.74879e-05
		X629	0	0	0	0	0	0	2	0	0	0	0	0	1	0	0	3	4.74879e-05
		I499	0	0	0	0	0	1	0	0	0	0	1	0	1	0	0	3	4.74879e-05
		B948	0	0	0	0	0	0	0	0	0	1	0	0	0	1	1	3	4.74879e-05
		C508	0	0	0	0	0	0	0	0	0	1	0	2	0	0	0	3	4.74879e-05
		W749	0	0	0	0	0	0	0	0	0	0	1	0	0	1	1	3	4.74879e-05
		B99	2	0	0	0	0	0	0	0	0	0	0	0	0	0	0	2	3.16586e-05
		C859	1	0	0	1	0	0	0	0	0	0	0	0	0	0	0	2	3.16586e-05
		K639	1	0	0	0	0	0	0	0	0	0	0	0	0	1	0	2	3.16586e-05
		I731	1	0	0	0	0	0	0	1	0	0	0	0	0	0	0	2	3.16586e-05
		K868	1	0	0	0	1	0	0	0	0	0	0	0	0	0	0	2	3.16586e-05
		H669	1	0	1	0	0	0	0	0	0	0	0	0	0	0	0	2	3.16586e-05
		B201	1	0	0	0	0	0	0	0	0	1	0	0	0	0	0	2	3.16586e-05
		V294	1	0	0	0	0	0	0	0	0	0	0	1	0	0	0	2	3.16586e-05
		I744	1	0	0	0	0	0	0	1	0	0	0	0	0	0	0	2	3.16586e-05
		C762	0	0	1	0	0	0	0	0	0	0	0	0	0	1	0	2	3.16586e-05
		C500	0	0	0	0	0	0	1	1	0	0	0	0	0	0	0	2	3.16586e-05
		C069	0	0	0	0	1	1	0	0	0	0	0	0	0	0	0	2	3.16586e-05
		K359	0	0	1	0	0	1	0	0	0	0	0	0	0	0	0	2	3.16586e-05
		M819	0	0	0	0	0	0	0	1	0	0	0	1	0	0	0	2	3.16586e-05
		K830	0	0	0	0	0	0	0	0	1	1	0	0	0	0	0	2	3.16586e-05
		C23	0	0	0	0	0	0	1	0	1	0	0	0	0	0	0	2	3.16586e-05
		D45	0	0	0	0	0	0	0	0	0	0	1	1	0	0	0	2	3.16586e-05
		L89	0	0	0	0	0	0	0	0	0	0	0	0	1	1	0	2	3.16586e-05
		Q253	0	0	0	0	0	0	1	1	0	0	0	0	0	0	0	2	3.16586e-05
		J219	0	0	0	0	0	0	0	1	1	0	0	0	0	0	0	2	3.16586e-05
		K254	0	0	0	0	0	0	1	0	0	0	0	0	1	0	0	2	3.16586e-05
		M318	0	0	0	0	0	1	0	0	1	0	0	0	0	0	0	2	3.16586e-05
		Q782	0	1	1	0	0	0	0	0	0	0	0	0	0	0	0	2	3.16586e-05
		I832	0	0	0	0	0	1	0	0	0	0	1	0	0	0	0	2	3.16586e-05
		E114	0	0	1	0	0	0	0	0	0	0	0	0	0	0	1	2	3.16586e-05
		F329	0	0	0	0	1	0	0	0	0	0	1	0	0	0	0	2	3.16586e-05
		D329	0	0	0	0	0	0	1	0	0	0	0	0	0	1	0	2	3.16586e-05
		I634	0	0	0	0	0	0	0	0	0	0	0	0	0	1	1	2	3.16586e-05
		I510	0	0	0	0	0	0	1	0	1	0	0	0	0	0	0	2	3.16586e-05
		J450	0	0	0	0	0	1	0	1	0	0	0	0	0	0	0	2	3.16586e-05
		B550	0	0	0	0	0	0	0	0	0	2	0	0	0	0	0	2	3.16586e-05
		I748	0	0	0	0	0	0	0	0	0	0	1	0	1	0	0	2	3.16586e-05
		C788	0	0	0	0	0	0	1	0	0	0	1	0	0	0	0	2	3.16586e-05
		K291	0	0	0	0	0	0	1	0	0	0	0	0	0	1	0	2	3.16586e-05
		D489	0	0	0	0	0	0	0	2	0	0	0	0	0	0	0	2	3.16586e-05
		C910	0	0	0	0	0	0	0	0	1	0	1	0	0	0	0	2	3.16586e-05
		E126	0	0	0	0	0	1	0	0	0	0	0	0	0	1	0	2	3.16586e-05
		W062	0	0	0	0	0	0	0	0	0	1	0	0	0	1	0	2	3.16586e-05
		K739	0	0	0	1	0	0	0	0	0	0	0	0	0	1	0	2	3.16586e-05
		N309	0	0	0	0	0	1	0	0	0	1	0	0	0	0	0	2	3.16586e-05
		C73	0	0	0	0	1	0	0	1	0	0	0	0	0	0	0	2	3.16586e-05
		F149	0	1	1	0	0	0	0	0	0	0	0	0	0	0	0	2	3.16586e-05
		E875	0	0	0	0	0	0	0	0	0	0	0	0	0	0	2	2	3.16586e-05
		V475	0	0	0	0	0	0	0	0	2	0	0	0	0	0	0	2	3.16586e-05
		K800	0	0	0	0	0	1	0	0	0	0	0	1	0	0	0	2	3.16586e-05
		I00	0	0	1	0	0	0	0	0	0	0	0	0	0	0	1	2	3.16586e-05
		I513	0	1	0	0	1	0	0	0	0	0	0	0	0	0	0	2	3.16586e-05
		G319	0	0	0	1	0	1	0	0	0	0	0	0	0	0	0	2	3.16586e-05
		G710	0	0	0	0	0	1	0	1	0	0	0	0	0	0	0	2	3.16586e-05
		K803	0	0	0	0	0	0	0	0	0	0	0	0	0	0	2	2	3.16586e-05
		I741	0	1	0	0	0	0	0	1	0	0	0	0	0	0	0	2	3.16586e-05
		E835	0	1	0	0	0	0	0	0	0	0	0	1	0	0	0	2	3.16586e-05
		C786	0	1	0	0	0	0	1	0	0	0	0	0	0	0	0	2	3.16586e-05
		J100	0	1	0	0	0	0	0	0	0	0	0	0	0	1	0	2	3.16586e-05
		X659	0	1	1	0	0	0	0	0	0	0	0	0	0	0	0	2	3.16586e-05
		J101	0	1	0	0	0	0	0	0	0	0	0	0	0	1	0	2	3.16586e-05
		E790	0	0	0	0	0	0	0	0	0	0	1	0	0	1	0	2	3.16586e-05
		B571	0	0	0	0	0	0	0	0	0	0	0	1	0	1	0	2	3.16586e-05
		E41	0	0	0	0	0	0	1	1	0	0	0	0	0	0	0	2	3.16586e-05
		K801	0	0	0	0	0	0	0	0	0	0	1	0	0	1	0	2	3.16586e-05
		C179	0	0	0	0	0	0	0	1	0	0	1	0	0	0	0	2	3.16586e-05
		E122	0	0	0	0	0	0	0	0	0	0	1	1	0	0	0	2	3.16586e-05
		Y159	0	0	0	0	0	0	0	1	1	0	0	0	0	0	0	2	3.16586e-05
		E840	0	0	0	0	0	0	1	0	1	0	0	0	0	0	0	2	3.16586e-05
		G809	0	0	1	0	0	0	0	0	0	0	0	0	1	0	0	2	3.16586e-05
		X239	0	0	0	0	0	0	0	0	0	0	0	1	0	0	1	2	3.16586e-05
		V289	0	0	0	0	0	0	0	0	1	0	1	0	0	0	0	2	3.16586e-05
		K318	0	0	1	0	0	1	0	0	0	0	0	0	0	0	0	2	3.16586e-05
		J691	0	0	0	0	0	0	1	0	0	0	0	1	0	0	0	2	3.16586e-05
		J840	0	0	0	0	0	0	0	0	0	1	0	0	1	0	0	2	3.16586e-05
		K590	0	0	0	0	0	0	2	0	0	0	0	0	0	0	0	2	3.16586e-05
		G403	0	0	1	0	1	0	0	0	0	0	0	0	0	0	0	2	3.16586e-05
		I830	0	0	0	0	0	0	1	0	0	0	0	0	1	0	0	2	3.16586e-05
		Q899	0	0	0	0	1	0	0	0	0	0	0	0	0	1	0	2	3.16586e-05
		Y099	0	0	0	0	0	0	0	0	0	1	0	0	0	1	0	2	3.16586e-05
		G932	0	0	0	0	0	0	0	0	1	0	0	0	1	0	0	2	3.16586e-05
		E079	0	0	0	0	0	0	0	0	1	0	0	1	0	0	0	2	3.16586e-05
		C541	0	0	0	0	0	0	0	0	1	1	0	0	0	0	0	2	3.16586e-05
		E729	0	0	0	0	0	0	0	0	0	0	1	1	0	0	0	2	3.16586e-05
		G459	0	0	0	0	0	1	0	0	0	0	0	0	1	0	0	2	3.16586e-05
		X959	0	0	0	0	0	0	1	0	1	0	0	0	0	0	0	2	3.16586e-05
		I738	0	0	1	0	0	0	0	0	0	0	0	0	0	1	0	2	3.16586e-05
		K413	0	0	1	0	0	0	0	0	0	0	1	0	0	0	0	2	3.16586e-05
		I132	0	0	1	1	0	0	0	0	0	0	0	0	0	0	0	2	3.16586e-05
		Q211	0	0	0	0	0	0	0	0	0	0	0	1	0	0	1	2	3.16586e-05
		C240	0	0	0	0	0	0	0	1	1	0	0	0	0	0	0	2	3.16586e-05
		I060	0	0	0	0	1	0	0	1	0	0	0	0	0	0	0	2	3.16586e-05
		F200	0	0	0	0	0	0	0	0	0	0	1	0	0	0	1	2	3.16586e-05
		I809	0	0	0	1	0	0	0	0	0	0	0	0	0	1	0	2	3.16586e-05
		I789	0	0	0	0	0	1	0	0	0	0	1	0	0	0	0	2	3.16586e-05
		X994	0	0	0	0	0	0	0	0	0	1	0	0	1	0	0	2	3.16586e-05
		B551	0	0	0	1	0	0	0	0	0	0	0	0	0	1	0	2	3.16586e-05
		G308	0	0	0	0	0	0	0	0	0	0	0	0	1	0	1	2	3.16586e-05
		E725	0	0	0	0	1	0	0	0	1	0	0	0	0	0	0	2	3.16586e-05
		C444	0	0	0	0	0	0	0	0	0	0	2	0	0	0	0	2	3.16586e-05
		B207	0	0	0	0	0	0	0	1	0	0	1	0	0	0	0	2	3.16586e-05
		K350	0	0	0	0	0	0	0	0	0	0	1	1	0	0	0	2	3.16586e-05
		B552	0	0	0	1	0	0	0	0	0	1	0	0	0	0	0	2	3.16586e-05
		Q250	0	0	0	0	0	0	0	0	0	0	0	0	2	0	0	2	3.16586e-05
		D599	0	0	0	0	0	0	0	0	0	0	0	1	1	0	0	2	3.16586e-05
		A499	0	0	0	0	0	0	0	0	0	1	0	0	1	0	0	2	3.16586e-05
		G400	0	0	0	0	0	1	0	0	0	0	0	0	0	0	1	2	3.16586e-05
		J431	0	0	0	0	0	0	0	0	0	0	0	1	0	1	0	2	3.16586e-05
		K296	0	0	0	0	1	0	0	1	0	0	0	0	0	0	0	2	3.16586e-05
		J942	0	0	0	0	1	0	0	0	0	0	1	0	0	0	0	2	3.16586e-05
		C538	0	0	0	0	0	0	1	0	0	0	1	0	0	0	0	2	3.16586e-05
		I607	0	0	0	0	0	0	0	0	0	0	0	0	0	2	0	2	3.16586e-05
		F191	0	0	0	0	0	0	0	0	0	0	0	1	0	0	1	2	3.16586e-05
		W877	0	0	0	0	0	0	0	0	0	0	0	2	0	0	0	2	3.16586e-05
		F142	0	0	0	0	0	0	0	0	0	1	1	0	0	0	0	2	3.16586e-05
		V235	0	0	0	0	1	0	0	0	0	0	1	0	0	0	0	2	3.16586e-05
		C795	0	0	0	0	1	1	0	0	0	0	0	0	0	0	0	2	3.16586e-05
		I300	0	0	0	0	0	0	0	0	0	0	0	1	1	0	0	2	3.16586e-05
		G458	0	0	0	0	0	0	2	0	0	0	0	0	0	0	0	2	3.16586e-05
		Q330	0	0	0	0	1	0	0	0	1	0	0	0	0	0	0	2	3.16586e-05
		C929	0	0	0	0	0	0	1	0	0	0	0	0	1	0	0	2	3.16586e-05
		E055	0	0	0	0	0	1	0	1	0	0	0	0	0	0	0	2	3.16586e-05
		E340	0	0	0	0	1	1	0	0	0	0	0	0	0	0	0	2	3.16586e-05
		J438	0	0	0	0	0	1	1	0	0	0	0	0	0	0	0	2	3.16586e-05
		D683	0	0	0	0	0	0	0	0	1	0	1	0	0	0	0	2	3.16586e-05
		X499	0	0	0	0	0	1	0	1	0	0	0	0	0	0	0	2	3.16586e-05
		P220	0	0	0	0	0	2	0	0	0	0	0	0	0	0	0	2	3.16586e-05
		C851	0	0	0	0	0	1	0	0	0	0	0	0	0	0	1	2	3.16586e-05
		K222	0	0	0	0	0	0	0	0	0	1	0	0	1	0	0	2	3.16586e-05
		A060	0	0	0	0	0	0	0	0	1	0	0	0	0	1	0	2	3.16586e-05
		E132	0	0	0	0	0	1	0	0	0	0	0	1	0	0	0	2	3.16586e-05
		K869	0	0	0	0	0	1	0	0	0	0	0	0	0	0	1	2	3.16586e-05
		E242	0	0	0	0	0	1	0	0	1	0	0	0	0	0	0	2	3.16586e-05
		I272	0	0	0	0	0	1	0	0	0	0	0	0	1	0	0	2	3.16586e-05
		V486	0	0	0	0	0	0	2	0	0	0	0	0	0	0	0	2	3.16586e-05
		I608	0	0	0	0	0	0	0	0	0	0	1	0	0	0	1	2	3.16586e-05
		E661	0	0	0	0	0	0	1	0	0	0	0	0	0	0	1	2	3.16586e-05
		I742	0	0	0	0	0	0	1	0	0	0	0	1	0	0	0	2	3.16586e-05
		K822	0	0	0	0	0	0	0	0	0	0	1	0	1	0	0	2	3.16586e-05
		E135	0	0	0	0	0	0	0	0	0	0	0	0	2	0	0	2	3.16586e-05
		X202	0	0	0	0	0	0	0	1	0	0	1	0	0	0	0	2	3.16586e-05
		N151	0	0	0	0	0	0	0	0	0	0	0	0	1	1	0	2	3.16586e-05
		D508	0	0	0	0	0	0	0	0	1	0	0	0	0	1	0	2	3.16586e-05
		R960	0	0	0	0	0	0	0	0	0	0	0	0	1	0	1	2	3.16586e-05
		E441	0	0	0	0	0	0	0	0	0	1	0	0	1	0	0	2	3.16586e-05
		W867	0	0	0	0	0	0	0	0	0	0	1	0	0	0	1	2	3.16586e-05
		D698	0	0	0	0	0	0	0	0	0	0	1	0	0	0	1	2	3.16586e-05
		G219	0	0	0	0	0	0	0	0	0	0	0	1	0	1	0	2	3.16586e-05
		Q02	0	0	0	0	0	0	0	0	0	0	0	0	1	1	0	2	3.16586e-05
		X425	0	0	0	0	0	0	0	0	0	0	0	0	1	0	1	2	3.16586e-05
		E078	0	0	0	0	0	0	0	0	0	0	0	0	0	1	1	2	3.16586e-05
		V879	0	0	0	0	0	0	0	0	0	0	0	0	0	0	2	2	3.16586e-05
		J157	1	0	0	0	0	0	0	0	0	0	0	0	0	0	0	1	1.58293e-05
		G936	1	0	0	0	0	0	0	0	0	0	0	0	0	0	0	1	1.58293e-05
		C443	1	0	0	0	0	0	0	0	0	0	0	0	0	0	0	1	1.58293e-05
		K650	1	0	0	0	0	0	0	0	0	0	0	0	0	0	0	1	1.58293e-05
		I629	1	0	0	0	0	0	0	0	0	0	0	0	0	0	0	1	1.58293e-05
		C629	1	0	0	0	0	0	0	0	0	0	0	0	0	0	0	1	1.58293e-05
		D65	1	0	0	0	0	0	0	0	0	0	0	0	0	0	0	1	1.58293e-05
		O149	1	0	0	0	0	0	0	0	0	0	0	0	0	0	0	1	1.58293e-05
		W340	1	0	0	0	0	0	0	0	0	0	0	0	0	0	0	1	1.58293e-05
		I400	1	0	0	0	0	0	0	0	0	0	0	0	0	0	0	1	1.58293e-05
		K262	1	0	0	0	0	0	0	0	0	0	0	0	0	0	0	1	1.58293e-05
		G930	1	0	0	0	0	0	0	0	0	0	0	0	0	0	0	1	1.58293e-05
		I891	1	0	0	0	0	0	0	0	0	0	0	0	0	0	0	1	1.58293e-05
		I461	1	0	0	0	0	0	0	0	0	0	0	0	0	0	0	1	1.58293e-05
		D470	1	0	0	0	0	0	0	0	0	0	0	0	0	0	0	1	1.58293e-05
		I831	1	0	0	0	0	0	0	0	0	0	0	0	0	0	0	1	1.58293e-05
		K264	1	0	0	0	0	0	0	0	0	0	0	0	0	0	0	1	1.58293e-05
		Y349	0	0	0	0	0	0	0	0	0	0	0	0	0	0	1	1	1.58293e-05
		I771	0	0	1	0	0	0	0	0	0	0	0	0	0	0	0	1	1.58293e-05
		J869	0	0	0	0	1	0	0	0	0	0	0	0	0	0	0	1	1.58293e-05
		X599	0	0	0	0	1	0	0	0	0	0	0	0	0	0	0	1	1.58293e-05
		I208	0	0	0	0	0	0	0	0	0	0	1	0	0	0	0	1	1.58293e-05
		J209	0	0	0	1	0	0	0	0	0	0	0	0	0	0	0	1	1.58293e-05
		F322	0	0	0	0	0	0	0	0	1	0	0	0	0	0	0	1	1.58293e-05
		C787	0	0	0	0	0	0	0	0	0	0	0	0	0	1	0	1	1.58293e-05
		K275	0	0	0	0	0	1	0	0	0	0	0	0	0	0	0	1	1.58293e-05
		C269	0	0	0	0	0	0	1	0	0	0	0	0	0	0	0	1	1.58293e-05
		E050	0	0	0	0	0	0	0	0	0	1	0	0	0	0	0	1	1.58293e-05
		I872	0	0	0	0	0	0	0	0	1	0	0	0	0	0	0	1	1.58293e-05
		A059	0	0	0	0	0	0	0	0	0	1	0	0	0	0	0	1	1.58293e-05
		I749	0	0	0	0	0	0	0	0	0	0	0	0	0	1	0	1	1.58293e-05
		J980	0	0	0	0	0	0	0	1	0	0	0	0	0	0	0	1	1.58293e-05
		J398	0	1	0	0	0	0	0	0	0	0	0	0	0	0	0	1	1.58293e-05
		E662	0	0	0	0	0	0	0	0	0	0	0	0	0	1	0	1	1.58293e-05
		K572	0	0	0	0	0	0	1	0	0	0	0	0	0	0	0	1	1.58293e-05
		B909	0	0	0	0	0	0	0	0	0	1	0	0	0	0	0	1	1.58293e-05
		E131	0	0	0	0	0	1	0	0	0	0	0	0	0	0	0	1	1.58293e-05
		A279	0	0	0	0	0	0	0	0	0	0	0	1	0	0	0	1	1.58293e-05
		F03	0	0	0	0	1	0	0	0	0	0	0	0	0	0	0	1	1.58293e-05
		I839	0	0	0	0	0	0	0	0	0	0	0	0	0	0	1	1	1.58293e-05
		C250	0	0	0	0	0	0	0	1	0	0	0	0	0	0	0	1	1.58293e-05
		I778	0	0	0	0	0	0	1	0	0	0	0	0	0	0	0	1	1.58293e-05
		J111	0	0	0	0	0	0	0	0	0	0	0	0	1	0	0	1	1.58293e-05
		L97	0	0	0	0	0	0	0	0	0	0	1	0	0	0	0	1	1.58293e-05
		J069	0	0	0	0	1	0	0	0	0	0	0	0	0	0	0	1	1.58293e-05
		X699	0	0	0	0	0	0	0	0	0	0	0	0	1	0	0	1	1.58293e-05
		C911	0	0	0	0	0	0	0	0	1	0	0	0	0	0	0	1	1.58293e-05
		G919	0	0	0	0	0	0	0	0	0	1	0	0	0	0	0	1	1.58293e-05
		B203	0	0	0	0	0	0	0	0	0	0	0	1	0	0	0	1	1.58293e-05
		F104	0	0	0	0	0	1	0	0	0	0	0	0	0	0	0	1	1.58293e-05
		K279	0	0	1	0	0	0	0	0	0	0	0	0	0	0	0	1	1.58293e-05
		K509	0	0	0	0	1	0	0	0	0	0	0	0	0	0	0	1	1.58293e-05
		I289	0	0	0	0	0	0	0	0	0	0	0	1	0	0	0	1	1.58293e-05
		C383	0	0	0	0	0	0	0	0	0	1	0	0	0	0	0	1	1.58293e-05
		K700	0	0	0	0	1	0	0	0	0	0	0	0	0	0	0	1	1.58293e-05
		X700	0	0	0	0	0	0	0	0	0	0	1	0	0	0	0	1	1.58293e-05
		I691	0	0	0	0	0	0	0	0	0	0	1	0	0	0	0	1	1.58293e-05
		Q238	0	0	0	0	0	0	1	0	0	0	0	0	0	0	0	1	1.58293e-05
		N429	0	0	0	0	0	0	0	0	0	0	0	0	0	1	0	1	1.58293e-05
		O159	0	0	0	0	0	0	0	0	0	0	0	0	1	0	0	1	1.58293e-05
		I859	0	0	0	0	0	0	1	0	0	0	0	0	0	0	0	1	1.58293e-05
		N280	0	0	0	0	0	0	0	0	0	0	0	0	0	1	0	1	1.58293e-05
		N049	0	0	0	0	0	0	0	0	0	0	0	0	1	0	0	1	1.58293e-05
		O96	0	0	0	0	0	0	0	0	0	0	0	0	0	1	0	1	1.58293e-05
		W060	0	1	0	0	0	0	0	0	0	0	0	0	0	0	0	1	1.58293e-05
		M511	0	0	0	0	0	0	0	0	0	0	0	1	0	0	0	1	1.58293e-05
		X954	0	0	0	1	0	0	0	0	0	0	0	0	0	0	0	1	1.58293e-05
		C950	0	0	0	0	0	1	0	0	0	0	0	0	0	0	0	1	1.58293e-05
		J451	0	0	0	0	0	1	0	0	0	0	0	0	0	0	0	1	1.58293e-05
		G911	0	0	0	0	0	0	0	0	0	0	0	0	0	1	0	1	1.58293e-05
		B200	0	0	0	0	0	0	0	0	0	0	1	0	0	0	0	1	1.58293e-05
		C384	0	0	0	0	0	0	0	1	0	0	0	0	0	0	0	1	1.58293e-05
		B659	0	0	1	0	0	0	0	0	0	0	0	0	0	0	0	1	1.58293e-05
		I341	0	0	0	0	0	0	1	0	0	0	0	0	0	0	0	1	1.58293e-05
		E756	0	0	0	0	0	0	0	0	0	0	1	0	0	0	0	1	1.58293e-05
		C765	0	0	0	0	0	1	0	0	0	0	0	0	0	0	0	1	1.58293e-05
		K721	0	0	1	0	0	0	0	0	0	0	0	0	0	0	0	1	1.58293e-05
		I690	0	0	0	0	0	0	0	0	0	0	1	0	0	0	0	1	1.58293e-05
		I724	0	0	1	0	0	0	0	0	0	0	0	0	0	0	0	1	1.58293e-05
		E778	0	0	0	0	0	0	0	0	0	0	1	0	0	0	0	1	1.58293e-05
		C490	0	0	0	0	0	0	1	0	0	0	0	0	0	0	0	1	1.58293e-05
		M199	0	0	0	0	0	0	0	0	0	0	1	0	0	0	0	1	1.58293e-05
		I729	0	0	0	0	0	0	0	0	0	0	0	0	1	0	0	1	1.58293e-05
		M311	0	0	0	0	0	0	0	0	0	0	0	0	0	0	1	1	1.58293e-05
		B91	0	0	0	0	0	0	0	0	0	0	0	0	0	0	1	1	1.58293e-05
		K805	0	0	0	0	0	0	0	0	0	0	0	0	0	1	0	1	1.58293e-05
		I618	0	0	0	0	0	0	0	0	0	0	0	0	0	0	1	1	1.58293e-05
		C419	0	0	0	0	0	0	1	0	0	0	0	0	0	0	0	1	1.58293e-05
		D400	0	0	0	0	0	0	0	0	0	0	0	1	0	0	0	1	1.58293e-05
		N133	0	0	0	0	0	0	0	0	0	1	0	0	0	0	0	1	1.58293e-05
		B349	0	0	0	0	0	0	1	0	0	0	0	0	0	0	0	1	1.58293e-05
		N059	0	0	0	0	0	1	0	0	0	0	0	0	0	0	0	1	1.58293e-05
		M053	0	1	0	0	0	0	0	0	0	0	0	0	0	0	0	1	1.58293e-05
		F190	0	0	0	0	0	0	0	0	0	0	1	0	0	0	0	1	1.58293e-05
		V031	0	0	0	0	1	0	0	0	0	0	0	0	0	0	0	1	1.58293e-05
		I715	0	0	0	0	0	0	0	0	0	1	0	0	0	0	0	1	1.58293e-05
		A35	0	1	0	0	0	0	0	0	0	0	0	0	0	0	0	1	1.58293e-05
		B519	0	1	0	0	0	0	0	0	0	0	0	0	0	0	0	1	1.58293e-05
		W544	0	1	0	0	0	0	0	0	0	0	0	0	0	0	0	1	1.58293e-05
		J13	0	1	0	0	0	0	0	0	0	0	0	0	0	0	0	1	1.58293e-05
		D440	0	1	0	0	0	0	0	0	0	0	0	0	0	0	0	1	1.58293e-05
		J61	0	1	0	0	0	0	0	0	0	0	0	0	0	0	0	1	1.58293e-05
		W700	0	1	0	0	0	0	0	0	0	0	0	0	0	0	0	1	1.58293e-05
		E831	0	1	0	0	0	0	0	0	0	0	0	0	0	0	0	1	1.58293e-05
		J81	0	1	0	0	0	0	0	0	0	0	0	0	0	0	0	1	1.58293e-05
		W559	0	1	0	0	0	0	0	0	0	0	0	0	0	0	0	1	1.58293e-05
		I078	0	1	0	0	0	0	0	0	0	0	0	0	0	0	0	1	1.58293e-05
		J689	0	1	0	0	0	0	0	0	0	0	0	0	0	0	0	1	1.58293e-05
		C782	0	1	0	0	0	0	0	0	0	0	0	0	0	0	0	1	1.58293e-05
		C921	0	0	1	0	0	0	0	0	0	0	0	0	0	0	0	1	1.58293e-05
		K251	0	0	0	0	0	0	0	0	0	0	1	0	0	0	0	1	1.58293e-05
		D759	0	0	0	0	0	0	0	0	0	0	0	0	0	1	0	1	1.58293e-05
		K270	0	0	0	0	0	0	0	0	0	0	0	0	1	0	0	1	1.58293e-05
		K529	0	0	0	0	0	0	0	0	0	0	0	0	1	0	0	1	1.58293e-05
		C951	0	0	0	0	0	1	0	0	0	0	0	0	0	0	0	1	1.58293e-05
		F99	0	0	0	0	0	0	0	0	0	1	0	0	0	0	0	1	1.58293e-05
		M869	0	0	0	0	0	0	0	0	0	0	0	0	0	0	1	1	1.58293e-05
		V800	0	0	0	0	0	0	0	0	0	1	0	0	0	0	0	1	1.58293e-05
		K20	0	0	0	0	0	0	0	0	0	0	0	1	0	0	0	1	1.58293e-05
		I098	0	0	0	0	0	0	0	0	1	0	0	0	0	0	0	1	1.58293e-05
		Q251	0	0	0	0	0	0	0	0	0	0	1	0	0	0	0	1	1.58293e-05
		I052	0	0	0	0	0	0	0	1	0	0	0	0	0	0	0	1	1.58293e-05
		C763	0	0	0	0	0	1	0	0	0	0	0	0	0	0	0	1	1.58293e-05
		A305	0	0	0	0	0	0	0	0	0	0	1	0	0	0	0	1	1.58293e-05
		I352	0	0	0	0	0	0	0	0	0	0	0	0	1	0	0	1	1.58293e-05
		D291	0	0	0	0	0	0	0	0	0	1	0	0	0	0	0	1	1.58293e-05
		C482	0	0	0	0	1	0	0	0	0	0	0	0	0	0	0	1	1.58293e-05
		C160	0	0	0	0	0	0	0	0	1	0	0	0	0	0	0	1	1.58293e-05
		C348	0	0	0	0	0	0	0	0	0	0	0	0	0	0	1	1	1.58293e-05
		N399	0	0	0	0	0	0	0	0	0	0	0	0	0	1	0	1	1.58293e-05
		X229	0	0	0	0	0	0	0	0	0	0	0	0	1	0	0	1	1.58293e-05
		Y834	0	0	0	0	0	0	1	0	0	0	0	0	0	0	0	1	1.58293e-05
		E748	0	0	0	1	0	0	0	0	0	0	0	0	0	0	0	1	1.58293e-05
		K711	0	0	0	0	0	0	0	0	0	0	0	0	1	0	0	1	1.58293e-05
		F162	0	0	0	0	0	0	0	0	0	1	0	0	0	0	0	1	1.58293e-05
		Q239	0	0	0	0	0	1	0	0	0	0	0	0	0	0	0	1	1.58293e-05
		C499	0	0	0	0	0	0	0	1	0	0	0	0	0	0	0	1	1.58293e-05
		N058	0	0	0	0	0	0	0	0	0	0	0	0	0	1	0	1	1.58293e-05
		J860	0	0	0	0	0	0	0	1	0	0	0	0	0	0	0	1	1.58293e-05
		I062	0	0	0	0	0	0	0	0	0	0	0	1	0	0	0	1	1.58293e-05
		I241	0	0	0	0	0	0	0	1	0	0	0	0	0	0	0	1	1.58293e-05
		J852	0	0	0	0	0	0	0	0	0	0	0	0	0	1	0	1	1.58293e-05
		B189	0	0	0	0	0	0	0	0	0	0	0	0	0	1	0	1	1.58293e-05
		N111	0	0	0	0	0	0	0	0	0	0	0	0	0	0	1	1	1.58293e-05
		I48	0	0	0	0	0	0	0	0	0	0	0	0	0	0	1	1	1.58293e-05
		C221	0	0	0	0	0	0	0	0	0	1	0	0	0	0	0	1	1.58293e-05
		I342	0	0	0	0	0	0	0	0	0	0	0	0	0	1	0	1	1.58293e-05
		D62	0	0	0	0	0	0	1	0	0	0	0	0	0	0	0	1	1.58293e-05
		D259	0	0	0	0	0	1	0	0	0	0	0	0	0	0	0	1	1.58293e-05
		Q203	0	0	0	0	0	0	0	1	0	0	0	0	0	0	0	1	1.58293e-05
		F019	0	0	0	0	0	0	0	0	1	0	0	0	0	0	0	1	1.58293e-05
		E249	0	0	1	0	0	0	0	0	0	0	0	0	0	0	0	1	1.58293e-05
		M512	0	0	1	0	0	0	0	0	0	0	0	0	0	0	0	1	1.58293e-05
		W708	0	0	1	0	0	0	0	0	0	0	0	0	0	0	0	1	1.58293e-05
		A170	0	0	1	0	0	0	0	0	0	0	0	0	0	0	0	1	1.58293e-05
		E52	0	0	1	0	0	0	0	0	0	0	0	0	0	0	0	1	1.58293e-05
		Y150	0	0	1	0	0	0	0	0	0	0	0	0	0	0	0	1	1.58293e-05
		X589	0	0	1	0	0	0	0	0	0	0	0	0	0	0	0	1	1.58293e-05
		C318	0	0	1	0	0	0	0	0	0	0	0	0	0	0	0	1	1.58293e-05
		A520	0	0	1	0	0	0	0	0	0	0	0	0	0	0	0	1	1.58293e-05
		D372	0	0	1	0	0	0	0	0	0	0	0	0	0	0	0	1	1.58293e-05
		N050	0	0	1	0	0	0	0	0	0	0	0	0	0	0	0	1	1.58293e-05
		Y000	0	0	1	0	0	0	0	0	0	0	0	0	0	0	0	1	1.58293e-05
		D075	0	0	1	0	0	0	0	0	0	0	0	0	0	0	0	1	1.58293e-05
		B770	0	0	1	0	0	0	0	0	0	0	0	0	0	0	0	1	1.58293e-05
		E839	0	0	1	0	0	0	0	0	0	0	0	0	0	0	0	1	1.58293e-05
		I427	0	0	1	0	0	0	0	0	0	0	0	0	0	0	0	1	1.58293e-05
		Y032	0	0	1	0	0	0	0	0	0	0	0	0	0	0	0	1	1.58293e-05
		V196	0	0	1	0	0	0	0	0	0	0	0	0	0	0	0	1	1.58293e-05
		G212	0	0	1	0	0	0	0	0	0	0	0	0	0	0	0	1	1.58293e-05
		I633	0	0	1	0	0	0	0	0	0	0	0	0	0	0	0	1	1.58293e-05
		E209	0	0	1	0	0	0	0	0	0	0	0	0	0	0	0	1	1.58293e-05
		K631	0	0	0	0	0	0	0	1	0	0	0	0	0	0	0	1	1.58293e-05
		N119	0	0	0	0	0	0	0	0	0	0	0	0	1	0	0	1	1.58293e-05
		K269	0	0	0	0	1	0	0	0	0	0	0	0	0	0	0	1	1.58293e-05
		C790	0	0	0	0	0	0	0	1	0	0	0	0	0	0	0	1	1.58293e-05
		O95	0	0	0	0	0	0	0	0	1	0	0	0	0	0	0	1	1.58293e-05
		D219	0	0	0	0	0	0	0	0	0	0	0	1	0	0	0	1	1.58293e-05
		O903	0	0	0	0	0	0	0	1	0	0	0	0	0	0	0	1	1.58293e-05
		G060	0	0	0	0	0	0	0	0	1	0	0	0	0	0	0	1	1.58293e-05
		I630	0	0	0	0	0	0	0	0	0	0	0	0	0	0	1	1	1.58293e-05
		V99	0	0	0	0	0	1	0	0	0	0	0	0	0	0	0	1	1.58293e-05
		X209	0	0	0	0	0	0	0	0	0	0	0	0	0	1	0	1	1.58293e-05
		C07	0	0	0	0	0	0	0	0	0	0	0	0	0	0	1	1	1.58293e-05
		E799	0	0	0	0	0	0	0	0	0	0	0	0	0	1	0	1	1.58293e-05
		C168	0	0	0	0	0	0	0	0	0	0	0	0	0	0	1	1	1.58293e-05
		M314	0	0	0	0	0	0	0	0	0	0	0	1	0	0	0	1	1.58293e-05
		M348	0	0	0	0	0	0	1	0	0	0	0	0	0	0	0	1	1.58293e-05
		D693	0	0	0	1	0	0	0	0	0	0	0	0	0	0	0	1	1.58293e-05
		J458	0	0	0	0	1	0	0	0	0	0	0	0	0	0	0	1	1.58293e-05
		W878	0	0	0	0	0	0	1	0	0	0	0	0	0	0	0	1	1.58293e-05
		I301	0	0	0	0	1	0	0	0	0	0	0	0	0	0	0	1	1.58293e-05
		K702	0	0	0	0	0	0	0	0	1	0	0	0	0	0	0	1	1.58293e-05
		C188	0	0	0	0	0	0	0	0	0	0	0	0	1	0	0	1	1.58293e-05
		N411	0	0	0	0	0	1	0	0	0	0	0	0	0	0	0	1	1.58293e-05
		W748	0	0	0	0	0	1	0	0	0	0	0	0	0	0	0	1	1.58293e-05
		I829	0	0	0	0	0	0	0	0	0	1	0	0	0	0	0	1	1.58293e-05
		K219	0	0	0	0	1	0	0	0	0	0	0	0	0	0	0	1	1.58293e-05
		N281	0	0	0	0	0	0	0	0	0	1	0	0	0	0	0	1	1.58293e-05
		J708	0	0	0	0	0	0	0	0	0	0	1	0	0	0	0	1	1.58293e-05
		X620	0	0	0	0	0	0	0	0	0	0	1	0	0	0	0	1	1.58293e-05
		W790	0	0	0	0	0	0	0	0	1	0	0	0	0	0	0	1	1.58293e-05
		W191	0	0	0	0	0	0	0	0	0	0	0	0	0	0	1	1	1.58293e-05
		D591	0	0	0	1	0	0	0	0	0	0	0	0	0	0	0	1	1.58293e-05
		C785	0	0	0	1	0	0	0	0	0	0	0	0	0	0	0	1	1.58293e-05
		I517	0	0	0	1	0	0	0	0	0	0	0	0	0	0	0	1	1.58293e-05
		D430	0	0	0	1	0	0	0	0	0	0	0	0	0	0	0	1	1.58293e-05
		C210	0	0	0	1	0	0	0	0	0	0	0	0	0	0	0	1	1.58293e-05
		D414	0	0	0	1	0	0	0	0	0	0	0	0	0	0	0	1	1.58293e-05
		W236	0	0	0	1	0	0	0	0	0	0	0	0	0	0	0	1	1.58293e-05
		B509	0	0	0	1	0	0	0	0	0	0	0	0	0	0	0	1	1.58293e-05
		Q289	0	0	0	1	0	0	0	0	0	0	0	0	0	0	0	1	1.58293e-05
		L108	0	0	0	1	0	0	0	0	0	0	0	0	0	0	0	1	1.58293e-05
		W851	0	0	0	1	0	0	0	0	0	0	0	0	0	0	0	1	1.58293e-05
		A165	0	0	0	1	0	0	0	0	0	0	0	0	0	0	0	1	1.58293e-05
		M109	0	0	0	1	0	0	0	0	0	0	0	0	0	0	0	1	1.58293e-05
		G118	0	0	0	1	0	0	0	0	0	0	0	0	0	0	0	1	1.58293e-05
		E052	0	0	0	1	0	0	0	0	0	0	0	0	0	0	0	1	1.58293e-05
		E720	0	0	0	0	0	0	0	0	0	1	0	0	0	0	0	1	1.58293e-05
		M310	0	0	0	0	0	0	0	0	0	0	0	0	0	0	1	1	1.58293e-05
		F108	0	0	0	0	0	0	0	0	0	1	0	0	0	0	0	1	1.58293e-05
		C796	0	0	0	0	0	0	0	0	0	0	0	0	0	1	0	1	1.58293e-05
		M339	0	0	0	0	0	0	0	0	0	0	0	1	0	0	0	1	1.58293e-05
		M313	0	0	0	0	0	0	1	0	0	0	0	0	0	0	0	1	1.58293e-05
		C678	0	0	0	0	0	0	0	0	0	0	0	0	1	0	0	1	1.58293e-05
		K839	0	0	0	0	0	0	0	0	0	1	0	0	0	0	0	1	1.58293e-05
		C793	0	0	0	0	0	0	0	0	0	1	0	0	0	0	0	1	1.58293e-05
		D570	0	0	0	0	0	0	1	0	0	0	0	0	0	0	0	1	1.58293e-05
		K439	0	0	0	0	0	0	0	1	0	0	0	0	0	0	0	1	1.58293e-05
		C729	0	0	0	0	0	0	0	0	0	0	0	0	0	1	0	1	1.58293e-05
		O998	0	0	0	0	0	0	0	0	0	1	0	0	0	0	0	1	1.58293e-05
		I775	0	0	0	0	0	0	0	0	1	0	0	0	0	0	0	1	1.58293e-05
		K921	0	0	0	0	0	0	0	0	0	0	0	0	0	1	0	1	1.58293e-05
		J150	0	0	0	0	0	0	0	0	0	0	0	0	1	0	0	1	1.58293e-05
		K351	0	0	0	0	0	0	0	0	0	0	0	1	0	0	0	1	1.58293e-05
		K420	0	0	0	0	1	0	0	0	0	0	0	0	0	0	0	1	1.58293e-05
		M009	0	0	0	0	1	0	0	0	0	0	0	0	0	0	0	1	1.58293e-05
		M479	0	0	0	0	1	0	0	0	0	0	0	0	0	0	0	1	1.58293e-05
		I951	0	0	0	0	0	0	0	0	1	0	0	0	0	0	0	1	1.58293e-05
		E038	0	0	0	0	1	0	0	0	0	0	0	0	0	0	0	1	1.58293e-05
		N738	0	0	0	0	1	0	0	0	0	0	0	0	0	0	0	1	1.58293e-05
		W648	0	0	0	0	1	0	0	0	0	0	0	0	0	0	0	1	1.58293e-05
		E248	0	0	0	0	1	0	0	0	0	0	0	0	0	0	0	1	1.58293e-05
		L022	0	0	0	0	1	0	0	0	0	0	0	0	0	0	0	1	1.58293e-05
		K429	0	0	0	0	0	0	0	1	0	0	0	0	0	0	0	1	1.58293e-05
		D383	0	0	0	0	0	0	0	0	0	0	0	1	0	0	0	1	1.58293e-05
		X337	0	0	0	0	0	0	0	1	0	0	0	0	0	0	0	1	1.58293e-05
		A409	0	0	0	0	0	0	0	0	0	0	0	1	0	0	0	1	1.58293e-05
		D600	0	0	0	0	0	0	0	0	0	0	1	0	0	0	0	1	1.58293e-05
		I012	0	0	0	0	0	1	0	0	0	0	0	0	0	0	0	1	1.58293e-05
		Y219	0	0	0	0	0	0	0	0	0	0	0	0	0	1	0	1	1.58293e-05
		I081	0	0	0	0	0	0	0	0	0	0	0	1	0	0	0	1	1.58293e-05
		I088	0	0	0	0	0	0	0	0	0	0	0	0	0	1	0	1	1.58293e-05
		X930	0	0	0	0	1	0	0	0	0	0	0	0	0	0	0	1	1.58293e-05
		C224	0	0	0	0	1	0	0	0	0	0	0	0	0	0	0	1	1.58293e-05
		J948	0	0	0	0	1	0	0	0	0	0	0	0	0	0	0	1	1.58293e-05
		E130	0	0	0	0	0	0	0	1	0	0	0	0	0	0	0	1	1.58293e-05
		C414	0	0	0	0	0	0	0	0	1	0	0	0	0	0	0	1	1.58293e-05
		V489	0	0	0	0	0	0	0	0	0	0	0	1	0	0	0	1	1.58293e-05
		M628	0	0	0	0	0	0	0	0	0	0	0	0	0	1	0	1	1.58293e-05
		C183	0	0	0	0	0	0	1	0	0	0	0	0	0	0	0	1	1.58293e-05
		D014	0	0	0	0	1	0	0	0	0	0	0	0	0	0	0	1	1.58293e-05
		K500	0	0	0	0	1	0	0	0	0	0	0	0	0	0	0	1	1.58293e-05
		K742	0	0	0	0	1	0	0	0	0	0	0	0	0	0	0	1	1.58293e-05
		K658	0	0	0	0	0	0	0	1	0	0	0	0	0	0	0	1	1.58293e-05
		K599	0	0	0	0	0	0	0	0	0	0	0	0	0	1	0	1	1.58293e-05
		N368	0	0	0	0	0	0	0	1	0	0	0	0	0	0	0	1	1.58293e-05
		I379	0	0	0	0	0	0	0	0	1	0	0	0	0	0	0	1	1.58293e-05
		C161	0	0	0	0	0	0	0	1	0	0	0	0	0	0	0	1	1.58293e-05
		E164	0	0	0	0	1	0	0	0	0	0	0	0	0	0	0	1	1.58293e-05
		A029	0	0	0	0	1	0	0	0	0	0	0	0	0	0	0	1	1.58293e-05
		K440	0	0	0	0	1	0	0	0	0	0	0	0	0	0	0	1	1.58293e-05
		C784	0	0	0	0	1	0	0	0	0	0	0	0	0	0	0	1	1.58293e-05
		J940	0	0	0	0	1	0	0	0	0	0	0	0	0	0	0	1	1.58293e-05
		E220	0	0	0	0	0	0	0	0	1	0	0	0	0	0	0	1	1.58293e-05
		B559	0	0	0	0	0	0	0	0	0	0	0	0	0	0	1	1	1.58293e-05
		Q209	0	0	0	0	0	0	0	0	1	0	0	0	0	0	0	1	1.58293e-05
		C442	0	0	0	0	0	1	0	0	0	0	0	0	0	0	0	1	1.58293e-05
		E348	0	0	0	0	0	1	0	0	0	0	0	0	0	0	0	1	1.58293e-05
		K261	0	0	0	0	0	1	0	0	0	0	0	0	0	0	0	1	1.58293e-05
		K518	0	0	0	0	0	1	0	0	0	0	0	0	0	0	0	1	1.58293e-05
		D376	0	0	0	0	0	1	0	0	0	0	0	0	0	0	0	1	1.58293e-05
		J128	0	0	0	0	0	0	0	0	0	0	0	1	0	0	0	1	1.58293e-05
		X640	0	0	0	0	0	0	0	0	0	0	0	1	0	0	0	1	1.58293e-05
		C751	0	0	0	0	0	0	0	0	0	0	1	0	0	0	0	1	1.58293e-05
		Q618	0	0	0	0	0	0	0	0	0	0	0	1	0	0	0	1	1.58293e-05
		K743	0	0	0	0	0	0	0	1	0	0	0	0	0	0	0	1	1.58293e-05
		V099	0	0	0	0	0	0	0	0	0	0	1	0	0	0	0	1	1.58293e-05
		K858	0	0	0	0	0	0	0	0	0	0	0	0	0	0	1	1	1.58293e-05
		K252	0	0	0	0	0	0	0	0	0	0	0	0	0	0	1	1	1.58293e-05
		C180	0	0	0	0	0	0	0	1	0	0	0	0	0	0	0	1	1.58293e-05
		V436	0	0	0	0	0	0	0	0	0	1	0	0	0	0	0	1	1.58293e-05
		X649	0	0	0	0	0	0	0	0	1	0	0	0	0	0	0	1	1.58293e-05
		D143	0	0	0	0	0	1	0	0	0	0	0	0	0	0	0	1	1.58293e-05
		J418	0	0	0	0	0	1	0	0	0	0	0	0	0	0	0	1	1.58293e-05
		D752	0	0	0	0	0	1	0	0	0	0	0	0	0	0	0	1	1.58293e-05
		L024	0	0	0	0	0	1	0	0	0	0	0	0	0	0	0	1	1.58293e-05
		Q233	0	0	0	0	0	0	0	0	0	0	0	1	0	0	0	1	1.58293e-05
		F332	0	0	0	0	0	0	0	0	0	0	0	1	0	0	0	1	1.58293e-05
		F110	0	0	0	0	0	0	0	0	0	0	1	0	0	0	0	1	1.58293e-05
		J411	0	0	0	0	0	0	0	0	0	0	0	0	1	0	0	1	1.58293e-05
		Y86	0	0	0	0	0	0	1	0	0	0	0	0	0	0	0	1	1.58293e-05
		C791	0	0	0	0	0	0	0	0	0	1	0	0	0	0	0	1	1.58293e-05
		V274	0	0	0	0	0	1	0	0	0	0	0	0	0	0	0	1	1.58293e-05
		V234	0	0	0	0	0	1	0	0	0	0	0	0	0	0	0	1	1.58293e-05
		A199	0	0	0	0	0	0	0	0	1	0	0	0	0	0	0	1	1.58293e-05
		C182	0	0	0	0	0	0	0	0	0	0	0	0	0	0	1	1	1.58293e-05
		K401	0	0	0	0	0	1	0	0	0	0	0	0	0	0	0	1	1.58293e-05
		E010	0	0	0	0	0	1	0	0	0	0	0	0	0	0	0	1	1.58293e-05
		X689	0	0	0	0	0	0	0	0	0	1	0	0	0	0	0	1	1.58293e-05
		Q219	0	0	0	0	0	0	0	0	0	0	0	0	0	0	1	1	1.58293e-05
		E649	0	0	0	0	0	0	1	0	0	0	0	0	0	0	0	1	1.58293e-05
		Y090	0	0	0	0	0	0	1	0	0	0	0	0	0	0	0	1	1.58293e-05
		J118	0	0	0	0	0	0	0	1	0	0	0	0	0	0	0	1	1.58293e-05
		L031	0	0	0	0	0	0	1	0	0	0	0	0	0	0	0	1	1.58293e-05
		I828	0	0	0	0	0	0	0	0	0	1	0	0	0	0	0	1	1.58293e-05
		W855	0	0	0	0	0	0	1	0	0	0	0	0	0	0	0	1	1.58293e-05
		V925	0	0	0	0	0	0	1	0	0	0	0	0	0	0	0	1	1.58293e-05
		X654	0	0	0	0	0	0	0	0	0	0	0	0	1	0	0	1	1.58293e-05
		K250	0	0	0	0	0	0	0	0	0	0	0	1	0	0	0	1	1.58293e-05
		X334	0	0	0	0	0	0	1	0	0	0	0	0	0	0	0	1	1.58293e-05
		D530	0	0	0	0	0	0	1	0	0	0	0	0	0	0	0	1	1.58293e-05
		B018	0	0	0	0	0	0	1	0	0	0	0	0	0	0	0	1	1.58293e-05
		G451	0	0	0	0	0	0	0	0	0	0	1	0	0	0	0	1	1.58293e-05
		C833	0	0	0	0	0	0	0	0	0	0	0	0	0	1	0	1	1.58293e-05
		W789	0	0	0	0	0	0	0	0	0	0	0	0	0	1	0	1	1.58293e-05
		K738	0	0	0	0	0	0	1	0	0	0	0	0	0	0	0	1	1.58293e-05
		H819	0	0	0	0	0	0	1	0	0	0	0	0	0	0	0	1	1.58293e-05
		Q278	0	0	0	0	0	0	1	0	0	0	0	0	0	0	0	1	1.58293e-05
		I068	0	0	0	0	0	0	1	0	0	0	0	0	0	0	0	1	1.58293e-05
		F179	0	0	0	0	0	0	1	0	0	0	0	0	0	0	0	1	1.58293e-05
		X680	0	0	0	0	0	0	0	0	0	0	0	0	1	0	0	1	1.58293e-05
		X440	0	0	0	0	0	0	0	0	0	0	0	0	0	1	0	1	1.58293e-05
		D479	0	0	0	0	0	0	0	0	0	1	0	0	0	0	0	1	1.58293e-05
		C341	0	0	0	0	0	0	0	0	0	0	1	0	0	0	0	1	1.58293e-05
		N23	0	0	0	0	0	0	0	0	0	0	0	0	1	0	0	1	1.58293e-05
		J853	0	0	0	0	0	0	0	0	0	0	0	1	0	0	0	1	1.58293e-05
		J09	0	0	0	0	0	0	0	0	0	0	1	0	0	0	0	1	1.58293e-05
		V280	0	0	0	0	0	0	0	0	1	0	0	0	0	0	0	1	1.58293e-05
		W182	0	0	0	0	0	0	0	0	0	0	1	0	0	0	0	1	1.58293e-05
		W015	0	0	0	0	0	0	0	0	0	0	0	0	0	0	1	1	1.58293e-05
		X590	0	0	0	0	0	0	0	1	0	0	0	0	0	0	0	1	1.58293e-05
		D381	0	0	0	0	0	0	0	1	0	0	0	0	0	0	0	1	1.58293e-05
		F321	0	0	0	0	0	0	0	0	0	0	0	1	0	0	0	1	1.58293e-05
		V224	0	0	0	0	0	0	0	1	0	0	0	0	0	0	0	1	1.58293e-05
		I635	0	0	0	0	0	0	0	0	0	0	0	0	0	0	1	1	1.58293e-05
		V904	0	0	0	0	0	0	0	1	0	0	0	0	0	0	0	1	1.58293e-05
		G729	0	0	0	0	0	0	0	1	0	0	0	0	0	0	0	1	1.58293e-05
		W854	0	0	0	0	0	0	0	0	0	0	0	0	0	0	1	1	1.58293e-05
		E749	0	0	0	0	0	0	0	0	0	0	0	0	1	0	0	1	1.58293e-05
		G903	0	0	0	0	0	0	0	0	1	0	0	0	0	0	0	1	1.58293e-05
		E871	0	0	0	0	0	0	0	0	0	0	0	0	1	0	0	1	1.58293e-05
		I470	0	0	0	0	0	0	0	1	0	0	0	0	0	0	0	1	1.58293e-05
		I029	0	0	0	0	0	0	0	1	0	0	0	0	0	0	0	1	1.58293e-05
		Q281	0	0	0	0	0	0	0	0	1	0	0	0	0	0	0	1	1.58293e-05
		N079	0	0	0	0	0	0	0	0	0	0	0	0	0	1	0	1	1.58293e-05
		X450	0	0	0	0	0	0	0	0	0	0	0	0	1	0	0	1	1.58293e-05
		F115	0	0	0	0	0	0	0	1	0	0	0	0	0	0	0	1	1.58293e-05
		D510	0	0	0	0	0	0	0	1	0	0	0	0	0	0	0	1	1.58293e-05
		X650	0	0	0	0	0	0	0	1	0	0	0	0	0	0	0	1	1.58293e-05
		W866	0	0	0	0	0	0	0	0	1	0	0	0	0	0	0	1	1.58293e-05
		A310	0	0	0	0	0	0	0	0	0	0	0	0	0	0	1	1	1.58293e-05
		A267	0	0	0	0	0	0	0	0	0	0	0	0	1	0	0	1	1.58293e-05
		I721	0	0	0	0	0	0	0	0	1	0	0	0	0	0	0	1	1.58293e-05
		G300	0	0	0	0	0	0	0	0	0	0	0	1	0	0	0	1	1.58293e-05
		F913	0	0	0	0	0	0	0	1	0	0	0	0	0	0	0	1	1.58293e-05
		X097	0	0	0	0	0	0	0	1	0	0	0	0	0	0	0	1	1.58293e-05
		I090	0	0	0	0	0	0	0	0	1	0	0	0	0	0	0	1	1.58293e-05
		G210	0	0	0	0	0	0	0	0	1	0	0	0	0	0	0	1	1.58293e-05
		V295	0	0	0	0	0	0	0	0	1	0	0	0	0	0	0	1	1.58293e-05
		X279	0	0	0	0	0	0	0	0	1	0	0	0	0	0	0	1	1.58293e-05
		X479	0	0	0	0	0	0	0	0	1	0	0	0	0	0	0	1	1.58293e-05
		K623	0	0	0	0	0	0	0	0	0	1	0	0	0	0	0	1	1.58293e-05
		W864	0	0	0	0	0	0	0	0	0	0	0	0	1	0	0	1	1.58293e-05
		K521	0	0	0	0	0	0	0	0	0	1	0	0	0	0	0	1	1.58293e-05
		Y079	0	0	0	0	0	0	0	0	1	0	0	0	0	0	0	1	1.58293e-05
		O993	0	0	0	0	0	0	0	0	1	0	0	0	0	0	0	1	1.58293e-05
		W069	0	0	0	0	0	0	0	0	1	0	0	0	0	0	0	1	1.58293e-05
		E754	0	0	0	0	0	0	0	0	1	0	0	0	0	0	0	1	1.58293e-05
		N303	0	0	0	0	0	0	0	0	1	0	0	0	0	0	0	1	1.58293e-05
		W874	0	0	0	0	0	0	0	0	0	1	0	0	0	0	0	1	1.58293e-05
		I079	0	0	0	0	0	0	0	0	0	1	0	0	0	0	0	1	1.58293e-05
		Y210	0	0	0	0	0	0	0	0	1	0	0	0	0	0	0	1	1.58293e-05
		C390	0	0	0	0	0	0	0	0	1	0	0	0	0	0	0	1	1.58293e-05
		W172	0	0	0	0	0	0	0	0	1	0	0	0	0	0	0	1	1.58293e-05
		C501	0	0	0	0	0	0	0	0	1	0	0	0	0	0	0	1	1.58293e-05
		B028	0	0	0	0	0	0	0	0	1	0	0	0	0	0	0	1	1.58293e-05
		I280	0	0	0	0	0	0	0	0	0	0	0	0	1	0	0	1	1.58293e-05
		C241	0	0	0	0	0	0	0	0	0	0	0	0	1	0	0	1	1.58293e-05
		G804	0	0	0	0	0	0	0	0	1	0	0	0	0	0	0	1	1.58293e-05
		C218	0	0	0	0	0	0	0	0	0	0	0	0	1	0	0	1	1.58293e-05
		I611	0	0	0	0	0	0	0	0	0	1	0	0	0	0	0	1	1.58293e-05
		F112	0	0	0	0	0	0	0	0	0	1	0	0	0	0	0	1	1.58293e-05
		V905	0	0	0	0	0	0	0	0	0	1	0	0	0	0	0	1	1.58293e-05
		M518	0	0	0	0	0	0	0	0	0	1	0	0	0	0	0	1	1.58293e-05
		N002	0	0	0	0	0	0	0	0	0	1	0	0	0	0	0	1	1.58293e-05
		D695	0	0	0	0	0	0	0	0	0	1	0	0	0	0	0	1	1.58293e-05
		K567	0	0	0	0	0	0	0	0	0	1	0	0	0	0	0	1	1.58293e-05
		O459	0	0	0	0	0	0	0	0	0	1	0	0	0	0	0	1	1.58293e-05
		X780	0	0	0	0	0	0	0	0	0	1	0	0	0	0	0	1	1.58293e-05
		X958	0	0	0	0	0	0	0	0	0	0	1	0	0	0	0	1	1.58293e-05
		Y004	0	0	0	0	0	0	0	0	0	0	0	0	0	1	0	1	1.58293e-05
		G401	0	0	0	0	0	0	0	0	0	0	0	0	0	1	0	1	1.58293e-05
		C969	0	0	0	0	0	0	0	0	0	0	0	0	1	0	0	1	1.58293e-05
		F160	0	0	0	0	0	0	0	0	0	1	0	0	0	0	0	1	1.58293e-05
		Y570	0	0	0	0	0	0	0	0	0	1	0	0	0	0	0	1	1.58293e-05
		N837	0	0	0	0	0	0	0	0	0	1	0	0	0	0	0	1	1.58293e-05
		E134	0	0	0	0	0	0	0	0	0	1	0	0	0	0	0	1	1.58293e-05
		N140	0	0	0	0	0	0	0	0	0	1	0	0	0	0	0	1	1.58293e-05
		C781	0	0	0	0	0	0	0	0	0	1	0	0	0	0	0	1	1.58293e-05
		Q240	0	0	0	0	0	0	0	0	0	0	0	0	1	0	0	1	1.58293e-05
		M350	0	0	0	0	0	0	0	0	0	0	1	0	0	0	0	1	1.58293e-05
		V877	0	0	0	0	0	0	0	0	0	1	0	0	0	0	0	1	1.58293e-05
		X622	0	0	0	0	0	0	0	0	0	1	0	0	0	0	0	1	1.58293e-05
		A542	0	0	0	0	0	0	0	0	0	1	0	0	0	0	0	1	1.58293e-05
		N251	0	0	0	0	0	0	0	0	0	1	0	0	0	0	0	1	1.58293e-05
		C023	0	0	0	0	0	0	0	0	0	1	0	0	0	0	0	1	1.58293e-05
		I360	0	0	0	0	0	0	0	0	0	1	0	0	0	0	0	1	1.58293e-05
		I604	0	0	0	0	0	0	0	0	0	0	1	0	0	0	0	1	1.58293e-05
		F159	0	0	0	0	0	0	0	0	0	0	1	0	0	0	0	1	1.58293e-05
		J108	0	0	0	0	0	0	0	0	0	0	0	0	0	1	0	1	1.58293e-05
		P239	0	0	0	0	0	0	0	0	0	0	1	0	0	0	0	1	1.58293e-05
		Y840	0	0	0	0	0	0	0	0	0	0	0	0	0	1	0	1	1.58293e-05
		W154	0	0	0	0	0	0	0	0	0	0	1	0	0	0	0	1	1.58293e-05
		C257	0	0	0	0	0	0	0	0	0	0	1	0	0	0	0	1	1.58293e-05
		I131	0	0	0	0	0	0	0	0	0	0	1	0	0	0	0	1	1.58293e-05
		I820	0	0	0	0	0	0	0	0	0	0	0	1	0	0	0	1	1.58293e-05
		C158	0	0	0	0	0	0	0	0	0	0	0	0	0	0	1	1	1.58293e-05
		W859	0	0	0	0	0	0	0	0	0	0	1	0	0	0	0	1	1.58293e-05
		J848	0	0	0	0	0	0	0	0	0	0	1	0	0	0	0	1	1.58293e-05
		A152	0	0	0	0	0	0	0	0	0	0	0	1	0	0	0	1	1.58293e-05
		D001	0	0	0	0	0	0	0	0	0	0	1	0	0	0	0	1	1.58293e-05
		H659	0	0	0	0	0	0	0	0	0	0	1	0	0	0	0	1	1.58293e-05
		C831	0	0	0	0	0	0	0	0	0	0	1	0	0	0	0	1	1.58293e-05
		N132	0	0	0	0	0	0	0	0	0	0	1	0	0	0	0	1	1.58293e-05
		Q893	0	0	0	0	0	0	0	0	0	0	1	0	0	0	0	1	1.58293e-05
		G92	0	0	0	0	0	0	0	0	0	0	1	0	0	0	0	1	1.58293e-05
		W149	0	0	0	0	0	0	0	0	0	0	1	0	0	0	0	1	1.58293e-05
		A403	0	0	0	0	0	0	0	0	0	0	0	1	0	0	0	1	1.58293e-05
		G609	0	0	0	0	0	0	0	0	0	0	0	1	0	0	0	1	1.58293e-05
		C65	0	0	0	0	0	0	0	0	0	0	0	1	0	0	0	1	1.58293e-05
		O879	0	0	0	0	0	0	0	0	0	0	0	1	0	0	0	1	1.58293e-05
		V922	0	0	0	0	0	0	0	0	0	0	0	1	0	0	0	1	1.58293e-05
		D483	0	0	0	0	0	0	0	0	0	0	0	1	0	0	0	1	1.58293e-05
		E272	0	0	0	0	0	0	0	0	0	0	0	1	0	0	0	1	1.58293e-05
		C448	0	0	0	0	0	0	0	0	0	0	0	0	1	0	0	1	1.58293e-05
		L409	0	0	0	0	0	0	0	0	0	0	0	1	0	0	0	1	1.58293e-05
		P612	0	0	0	0	0	0	0	0	0	0	0	1	0	0	0	1	1.58293e-05
		C252	0	0	0	0	0	0	0	0	0	0	0	0	1	0	0	1	1.58293e-05
		X207	0	0	0	0	0	0	0	0	0	0	0	1	0	0	0	1	1.58293e-05
		D151	0	0	0	0	0	0	0	0	0	0	0	1	0	0	0	1	1.58293e-05
		O13	0	0	0	0	0	0	0	0	0	0	0	0	1	0	0	1	1.58293e-05
		G402	0	0	0	0	0	0	0	0	0	0	0	0	1	0	0	1	1.58293e-05
		O909	0	0	0	0	0	0	0	0	0	0	0	0	1	0	0	1	1.58293e-05
		D487	0	0	0	0	0	0	0	0	0	0	0	0	1	0	0	1	1.58293e-05
		I841	0	0	0	0	0	0	0	0	0	0	0	0	1	0	0	1	1.58293e-05
		D538	0	0	0	0	0	0	0	0	0	0	0	0	1	0	0	1	1.58293e-05
		J432	0	0	0	0	0	0	0	0	0	0	0	0	1	0	0	1	1.58293e-05
		V445	0	0	0	0	0	0	0	0	0	0	0	0	1	0	0	1	1.58293e-05
		B059	0	0	0	0	0	0	0	0	0	0	0	0	1	0	0	1	1.58293e-05
		L032	0	0	0	0	0	0	0	0	0	0	0	0	1	0	0	1	1.58293e-05
		W691	0	0	0	0	0	0	0	0	0	0	0	0	1	0	0	1	1.58293e-05
		W013	0	0	0	0	0	0	0	0	0	0	0	0	1	0	0	1	1.58293e-05
		N420	0	0	0	0	0	0	0	0	0	0	0	0	1	0	0	1	1.58293e-05
		A480	0	0	0	0	0	0	0	0	0	0	0	0	0	1	0	1	1.58293e-05
		Q392	0	0	0	0	0	0	0	0	0	0	0	0	0	1	0	1	1.58293e-05
		F146	0	0	0	0	0	0	0	0	0	0	0	0	0	1	0	1	1.58293e-05
		X840	0	0	0	0	0	0	0	0	0	0	0	0	0	1	0	1	1.58293e-05
		K310	0	0	0	0	0	0	0	0	0	0	0	0	0	1	0	1	1.58293e-05
		J850	0	0	0	0	0	0	0	0	0	0	0	0	0	1	0	1	1.58293e-05
		X704	0	0	0	0	0	0	0	0	0	0	0	0	0	1	0	1	1.58293e-05
		I616	0	0	0	0	0	0	0	0	0	0	0	0	0	1	0	1	1.58293e-05
		I479	0	0	0	0	0	0	0	0	0	0	0	0	0	1	0	1	1.58293e-05
		A308	0	0	0	0	0	0	0	0	0	0	0	0	0	1	0	1	1.58293e-05
		N311	0	0	0	0	0	0	0	0	0	0	0	0	0	1	0	1	1.58293e-05
		X651	0	0	0	0	0	0	0	0	0	0	0	0	0	1	0	1	1.58293e-05
		W876	0	0	0	0	0	0	0	0	0	0	0	0	0	0	1	1	1.58293e-05
		X298	0	0	0	0	0	0	0	0	0	0	0	0	0	0	1	1	1.58293e-05
		M729	0	0	0	0	0	0	0	0	0	0	0	0	0	0	1	1	1.58293e-05
		K762	0	0	0	0	0	0	0	0	0	0	0	0	0	0	1	1	1.58293e-05
		M866	0	0	0	0	0	0	0	0	0	0	0	0	0	0	1	1	1.58293e-05
		M891	0	0	0	0	0	0	0	0	0	0	0	0	0	0	1	1	1.58293e-05
		G968	0	0	0	0	0	0	0	0	0	0	0	0	0	0	1	1	1.58293e-05
		C505	0	0	0	0	0	0	0	0	0	0	0	0	0	0	1	1	1.58293e-05
		Y009	0	0	0	0	0	0	0	0	0	0	0	0	0	0	1	1	1.58293e-05
		E031	0	0	0	0	0	0	0	0	0	0	0	0	0	0	1	1	1.58293e-05
		V285	0	0	0	0	0	0	0	0	0	0	0	0	0	0	1	1	1.58293e-05
		Q246	0	0	0	0	0	0	0	0	0	0	0	0	0	0	1	1	1.58293e-05
		O244	0	0	0	0	0	0	0	0	0	0	0	0	0	0	1	1	1.58293e-05
		X237	0	0	0	0	0	0	0	0	0	0	0	0	0	0	1	1	1.58293e-05
		K292	0	0	0	0	0	0	0	0	0	0	0	0	0	0	0	0	0
		K274	0	0	0	0	0	0	0	0	0	0	0	0	0	0	0	0	0
		F105	0	0	0	0	0	0	0	0	0	0	0	0	0	0	0	0	0
		Y883	0	0	0	0	0	0	0	0	0	0	0	0	0	0	0	0	0
		Y300	0	0	0	0	0	0	0	0	0	0	0	0	0	0	0	0	0
		D66	0	0	0	0	0	0	0	0	0	0	0	0	0	0	0	0	0
		C187	0	0	0	0	0	0	0	0	0	0	0	0	0	0	0	0	0
		D473	0	0	0	0	0	0	0	0	0	0	0	0	0	0	0	0	0
		K659	0	0	0	0	0	0	0	0	0	0	0	0	0	0	0	0	0
		B573	0	0	0	0	0	0	0	0	0	0	0	0	0	0	0	0	0
		D608	0	0	0	0	0	0	0	0	0	0	0	0	0	0	0	0	0
		K562	0	0	0	0	0	0	0	0	0	0	0	0	0	0	0	0	0
		D377	0	0	0	0	0	0	0	0	0	0	0	0	0	0	0	0	0
		K766	0	0	0	0	0	0	0	0	0	0	0	0	0	0	0	0	0
		N288	0	0	0	0	0	0	0	0	0	0	0	0	0	0	0	0	0
		I423	0	0	0	0	0	0	0	0	0	0	0	0	0	0	0	0	0
		P570	0	0	0	0	0	0	0	0	0	0	0	0	0	0	0	0	0
		C579	0	0	0	0	0	0	0	0	0	0	0	0	0	0	0	0	0
		D320	0	0	0	0	0	0	0	0	0	0	0	0	0	0	0	0	0
		N824	0	0	0	0	0	0	0	0	0	0	0	0	0	0	0	0	0
		K551	0	0	0	0	0	0	0	0	0	0	0	0	0	0	0	0	0
		A180	0	0	0	0	0	0	0	0	0	0	0	0	0	0	0	0	0
		C494	0	0	0	0	0	0	0	0	0	0	0	0	0	0	0	0	0
		Y280	0	0	0	0	0	0	0	0	0	0	0	0	0	0	0	0	0
		O992	0	0	0	0	0	0	0	0	0	0	0	0	0	0	0	0	0
		G709	0	0	0	0	0	0	0	0	0	0	0	0	0	0	0	0	0
		M139	0	0	0	0	0	0	0	0	0	0	0	0	0	0	0	0	0
		E041	0	0	0	0	0	0	0	0	0	0	0	0	0	0	0	0	0
		J628	0	0	0	0	0	0	0	0	0	0	0	0	0	0	0	0	0
		B029	0	0	0	0	0	0	0	0	0	0	0	0	0	0	0	0	0
		O101	0	0	0	0	0	0	0	0	0	0	0	0	0	0	0	0	0
		F988	0	0	0	0	0	0	0	0	0	0	0	0	0	0	0	0	0
		N328	0	0	0	0	0	0	0	0	0	0	0	0	0	0	0	0	0
		C728	0	0	0	0	0	0	0	0	0	0	0	0	0	0	0	0	0
		M889	0	0	0	0	0	0	0	0	0	0	0	0	0	0	0	0	0
		K578	0	0	0	0	0	0	0	0	0	0	0	0	0	0	0	0	0
		M100	0	0	0	0	0	0	0	0	0	0	0	0	0	0	0	0	0
		K421	0	0	0	0	0	0	0	0	0	0	0	0	0	0	0	0	0
		W849	0	0	0	0	0	0	0	0	0	0	0	0	0	0	0	0	0
		C140	0	0	0	0	0	0	0	0	0	0	0	0	0	0	0	0	0
		M169	0	0	0	0	0	0	0	0	0	0	0	0	0	0	0	0	0
		K610	0	0	0	0	0	0	0	0	0	0	0	0	0	0	0	0	0
		K565	0	0	0	0	0	0	0	0	0	0	0	0	0	0	0	0	0
		K818	0	0	0	0	0	0	0	0	0	0	0	0	0	0	0	0	0
		W690	0	0	0	0	0	0	0	0	0	0	0	0	0	0	0	0	0
		K229	0	0	0	0	0	0	0	0	0	0	0	0	0	0	0	0	0
		Y248	0	0	0	0	0	0	0	0	0	0	0	0	0	0	0	0	0
		W738	0	0	0	0	0	0	0	0	0	0	0	0	0	0	0	0	0
		K560	0	0	0	0	0	0	0	0	0	0	0	0	0	0	0	0	0
		O723	0	0	0	0	0	0	0	0	0	0	0	0	0	0	0	0	0
		I372	0	0	0	0	0	0	0	0	0	0	0	0	0	0	0	0	0
		C675	0	0	0	0	0	0	0	0	0	0	0	0	0	0	0	0	0
		P292	0	0	0	0	0	0	0	0	0	0	0	0	0	0	0	0	0
		K256	0	0	0	0	0	0	0	0	0	0	0	0	0	0	0	0	0
		A86	0	0	0	0	0	0	0	0	0	0	0	0	0	0	0	0	0
		J981	0	0	0	0	0	0	0	0	0	0	0	0	0	0	0	0	0
		K37	0	0	0	0	0	0	0	0	0	0	0	0	0	0	0	0	0
		K311	0	0	0	0	0	0	0	0	0	0	0	0	0	0	0	0	0
		B178	0	0	0	0	0	0	0	0	0	0	0	0	0	0	0	0	0
		I613	0	0	0	0	0	0	0	0	0	0	0	0	0	0	0	0	0
		I600	0	0	0	0	0	0	0	0	0	0	0	0	0	0	0	0	0
		K820	0	0	0	0	0	0	0	0	0	0	0	0	0	0	0	0	0
		J430	0	0	0	0	0	0	0	0	0	0	0	0	0	0	0	0	0
		D410	0	0	0	0	0	0	0	0	0	0	0	0	0	0	0	0	0
		K928	0	0	0	0	0	0	0	0	0	0	0	0	0	0	0	0	0
		G728	0	0	0	0	0	0	0	0	0	0	0	0	0	0	0	0	0
		V446	0	0	0	0	0	0	0	0	0	0	0	0	0	0	0	0	0
		W126	0	0	0	0	0	0	0	0	0	0	0	0	0	0	0	0	0
		V284	0	0	0	0	0	0	0	0	0	0	0	0	0	0	0	0	0
		G721	0	0	0	0	0	0	0	0	0	0	0	0	0	0	0	0	0
		Y218	0	0	0	0	0	0	0	0	0	0	0	0	0	0	0	0	0
		W309	0	0	0	0	0	0	0	0	0	0	0	0	0	0	0	0	0
		G231	0	0	0	0	0	0	0	0	0	0	0	0	0	0	0	0	0
		X120	0	0	0	0	0	0	0	0	0	0	0	0	0	0	0	0	0
		W557	0	0	0	0	0	0	0	0	0	0	0	0	0	0	0	0	0
		Q613	0	0	0	0	0	0	0	0	0	0	0	0	0	0	0	0	0
		O721	0	0	0	0	0	0	0	0	0	0	0	0	0	0	0	0	0
		B574	0	0	0	0	0	0	0	0	0	0	0	0	0	0	0	0	0
		D369	0	0	0	0	0	0	0	0	0	0	0	0	0	0	0	0	0
		K768	0	0	0	0	0	0	0	0	0	0	0	0	0	0	0	0	0
		W949	0	0	0	0	0	0	0	0	0	0	0	0	0	0	0	0	0
		Q401	0	0	0	0	0	0	0	0	0	0	0	0	0	0	0	0	0
		I069	0	0	0	0	0	0	0	0	0	0	0	0	0	0	0	0	0
		N159	0	0	0	0	0	0	0	0	0	0	0	0	0	0	0	0	0
		Q205	0	0	0	0	0	0	0	0	0	0	0	0	0	0	0	0	0
		F170	0	0	0	0	0	0	0	0	0	0	0	0	0	0	0	0	0
		N72	0	0	0	0	0	0	0	0	0	0	0	0	0	0	0	0	0
		F339	0	0	0	0	0	0	0	0	0	0	0	0	0	0	0	0	0
		J182	0	0	0	0	0	0	0	0	0	0	0	0	0	0	0	0	0
		B171	0	0	0	0	0	0	0	0	0	0	0	0	0	0	0	0	0
		K450	0	0	0	0	0	0	0	0	0	0	0	0	0	0	0	0	0
		I051	0	0	0	0	0	0	0	0	0	0	0	0	0	0	0	0	0
		A161	0	0	0	0	0	0	0	0	0	0	0	0	0	0	0	0	0
		D464	0	0	0	0	0	0	0	0	0	0	0	0	0	0	0	0	0
		G831	0	0	0	0	0	0	0	0	0	0	0	0	0	0	0	0	0
		J709	0	0	0	0	0	0	0	0	0	0	0	0	0	0	0	0	0
		B679	0	0	0	0	0	0	0	0	0	0	0	0	0	0	0	0	0
		B410	0	0	0	0	0	0	0	0	0	0	0	0	0	0	0	0	0
		A085	0	0	0	0	0	0	0	0	0	0	0	0	0	0	0	0	0
		I516	0	0	0	0	0	0	0	0	0	0	0	0	0	0	0	0	0
		K510	0	0	0	0	0	0	0	0	0	0	0	0	0	0	0	0	0
		E708	0	0	0	0	0	0	0	0	0	0	0	0	0	0	0	0	0
		F209	0	0	0	0	0	0	0	0	0	0	0	0	0	0	0	0	0
		E671	0	0	0	0	0	0	0	0	0	0	0	0	0	0	0	0	0
		E440	0	0	0	0	0	0	0	0	0	0	0	0	0	0	0	0	0
		E129	0	0	0	0	0	0	0	0	0	0	0	0	0	0	0	0	0
		K759	0	0	0	0	0	0	0	0	0	0	0	0	0	0	0	0	0
		W848	0	0	0	0	0	0	0	0	0	0	0	0	0	0	0	0	0
		Y841	0	0	0	0	0	0	0	0	0	0	0	0	0	0	0	0	0
		V251	0	0	0	0	0	0	0	0	0	0	0	0	0	0	0	0	0
		E854	0	0	0	0	0	0	0	0	0	0	0	0	0	0	0	0	0
		G909	0	0	0	0	0	0	0	0	0	0	0	0	0	0	0	0	0
		K559	0	0	0	0	0	0	0	0	0	0	0	0	0	0	0	0	0
		C519	0	0	0	0	0	0	0	0	0	0	0	0	0	0	0	0	0
		L080	0	0	0	0	0	0	0	0	0	0	0	0	0	0	0	0	0
		G951	0	0	0	0	0	0	0	0	0	0	0	0	0	0	0	0	0
		M320	0	0	0	0	0	0	0	0	0	0	0	0	0	0	0	0	0
		E128	0	0	0	0	0	0	0	0	0	0	0	0	0	0	0	0	0
		V890	0	0	0	0	0	0	0	0	0	0	0	0	0	0	0	0	0
		D642	0	0	0	0	0	0	0	0	0	0	0	0	0	0	0	0	0
		K319	0	0	0	0	0	0	0	0	0	0	0	0	0	0	0	0	0
		G406	0	0	0	0	0	0	0	0	0	0	0	0	0	0	0	0	0
		I099	0	0	0	0	0	0	0	0	0	0	0	0	0	0	0	0	0
		J949	0	0	0	0	0	0	0	0	0	0	0	0	0	0	0	0	0
		Q255	0	0	0	0	0	0	0	0	0	0	0	0	0	0	0	0	0
		C089	0	0	0	0	0	0	0	0	0	0	0	0	0	0	0	0	0
		C410	0	0	0	0	0	0	0	0	0	0	0	0	0	0	0	0	0
		M059	0	0	0	0	0	0	0	0	0	0	0	0	0	0	0	0	0
		Y309	0	0	0	0	0	0	0	0	0	0	0	0	0	0	0	0	0
		G311	0	0	0	0	0	0	0	0	0	0	0	0	0	0	0	0	0
		C029	0	0	0	0	0	0	0	0	0	0	0	0	0	0	0	0	0
		J47	0	0	0	0	0	0	0	0	0	0	0	0	0	0	0	0	0
		C328	0	0	0	0	0	0	0	0	0	0	0	0	0	0	0	0	0
		I673	0	0	0	0	0	0	0	0	0	0	0	0	0	0	0	0	0
		F119	0	0	0	0	0	0	0	0	0	0	0	0	0	0	0	0	0
		A390	0	0	0	0	0	0	0	0	0	0	0	0	0	0	0	0	0
		I850	0	0	0	0	0	0	0	0	0	0	0	0	0	0	0	0	0
		Y199	0	0	0	0	0	0	0	0	0	0	0	0	0	0	0	0	0
		E881	0	0	0	0	0	0	0	0	0	0	0	0	0	0	0	0	0
		V911	0	0	0	0	0	0	0	0	0	0	0	0	0	0	0	0	0
		J982	0	0	0	0	0	0	0	0	0	0	0	0	0	0	0	0	0
		D090	0	0	0	0	0	0	0	0	0	0	0	0	0	0	0	0	0
		D696	0	0	0	0	0	0	0	0	0	0	0	0	0	0	0	0	0
		Q340	0	0	0	0	0	0	0	0	0	0	0	0	0	0	0	0	0
		D694	0	0	0	0	0	0	0	0	0	0	0	0	0	0	0	0	0
		Y839	0	0	0	0	0	0	0	0	0	0	0	0	0	0	0	0	0
		I348	0	0	0	0	0	0	0	0	0	0	0	0	0	0	0	0	0
		K833	0	0	0	0	0	0	0	0	0	0	0	0	0	0	0	0	0
		Y836	0	0	0	0	0	0	0	0	0	0	0	0	0	0	0	0	0
		K430	0	0	0	0	0	0	0	0	0	0	0	0	0	0	0	0	0
		G939	0	0	0	0	0	0	0	0	0	0	0	0	0	0	0	0	0
		J704	0	0	0	0	0	0	0	0	0	0	0	0	0	0	0	0	0
		N26	0	0	0	0	0	0	0	0	0	0	0	0	0	0	0	0	0
		G408	0	0	0	0	0	0	0	0	0	0	0	0	0	0	0	0	0
		Y818	0	0	0	0	0	0	0	0	0	0	0	0	0	0	0	0	0
		M165	0	0	0	0	0	0	0	0	0	0	0	0	0	0	0	0	0
		K221	0	0	0	0	0	0	0	0	0	0	0	0	0	0	0	0	0
		G621	0	0	0	0	0	0	0	0	0	0	0	0	0	0	0	0	0
		Q259	0	0	0	0	0	0	0	0	0	0	0	0	0	0	0	0	0
		I99	0	0	0	0	0	0	0	0	0	0	0	0	0	0	0	0	0
		F919	0	0	0	0	0	0	0	0	0	0	0	0	0	0	0	0	0
		K622	0	0	0	0	0	0	0	0	0	0	0	0	0	0	0	0	0
		K752	0	0	0	0	0	0	0	0	0	0	0	0	0	0	0	0	0
		H570	0	0	0	0	0	0	0	0	0	0	0	0	0	0	0	0	0
		I723	0	0	0	0	0	0	0	0	0	0	0	0	0	0	0	0	0
		K824	0	0	0	0	0	0	0	0	0	0	0	0	0	0	0	0	0
		K513	0	0	0	0	0	0	0	0	0	0	0	0	0	0	0	0	0
		Q221	0	0	0	0	0	0	0	0	0	0	0	0	0	0	0	0	0
		G589	0	0	0	0	0	0	0	0	0	0	0	0	0	0	0	0	0
		G312	0	0	0	0	0	0	0	0	0	0	0	0	0	0	0	0	0
		G039	0	0	0	0	0	0	0	0	0	0	0	0	0	0	0	0	0
		B019	0	0	0	0	0	0	0	0	0	0	0	0	0	0	0	0	0
		F500	0	0	0	0	0	0	0	0	0	0	0	0	0	0	0	0	0
		G407	0	0	0	0	0	0	0	0	0	0	0	0	0	0	0	0	0
		E274	0	0	0	0	0	0	0	0	0	0	0	0	0	0	0	0	0
		A319	0	0	0	0	0	0	0	0	0	0	0	0	0	0	0	0	0
		M859	0	0	0	0	0	0	0	0	0	0	0	0	0	0	0	0	0
		C186	0	0	0	0	0	0	0	0	0	0	0	0	0	0	0	0	0
		K30	0	0	0	0	0	0	0	0	0	0	0	0	0	0	0	0	0
		K461	0	0	0	0	0	0	0	0	0	0	0	0	0	0	0	0	0
		F430	0	0	0	0	0	0	0	0	0	0	0	0	0	0	0	0	0
		Y189	0	0	0	0	0	0	0	0	0	0	0	0	0	0	0	0	0
		V221	0	0	0	0	0	0	0	0	0	0	0	0	0	0	0	0	0
		B162	0	0	0	0	0	0	0	0	0	0	0	0	0	0	0	0	0
		C711	0	0	0	0	0	0	0	0	0	0	0	0	0	0	0	0	0
		K558	0	0	0	0	0	0	0	0	0	0	0	0	0	0	0	0	0
		C170	0	0	0	0	0	0	0	0	0	0	0	0	0	0	0	0	0
		F251	0	0	0	0	0	0	0	0	0	0	0	0	0	0	0	0	0
		K638	0	0	0	0	0	0	0	0	0	0	0	0	0	0	0	0	0
		E640	0	0	0	0	0	0	0	0	0	0	0	0	0	0	0	0	0
		I670	0	0	0	0	0	0	0	0	0	0	0	0	0	0	0	0	0
		W110	0	0	0	0	0	0	0	0	0	0	0	0	0	0	0	0	0
		M800	0	0	0	0	0	0	0	0	0	0	0	0	0	0	0	0	0
		K564	0	0	0	0	0	0	0	0	0	0	0	0	0	0	0	0	0
		P209	0	0	0	0	0	0	0	0	0	0	0	0	0	0	0	0	0
		J410	0	0	0	0	0	0	0	0	0	0	0	0	0	0	0	0	0
		K571	0	0	0	0	0	0	0	0	0	0	0	0	0	0	0	0	0
		W682	0	0	0	0	0	0	0	0	0	0	0	0	0	0	0	0	0
		V689	0	0	0	0	0	0	0	0	0	0	0	0	0	0	0	0	0
		K904	0	0	0	0	0	0	0	0	0	0	0	0	0	0	0	0	0
		D223	0	0	0	0	0	0	0	0	0	0	0	0	0	0	0	0	0
		K265	0	0	0	0	0	0	0	0	0	0	0	0	0	0	0	0	0
		C155	0	0	0	0	0	0	0	0	0	0	0	0	0	0	0	0	0
		K299	0	0	0	0	0	0	0	0	0	0	0	0	0	0	0	0	0
		M722	0	0	0	0	0	0	0	0	0	0	0	0	0	0	0	0	0
		I745	0	0	0	0	0	0	0	0	0	0	0	0	0	0	0	0	0
		M802	0	0	0	0	0	0	0	0	0	0	0	0	0	0	0	0	0
		F220	0	0	0	0	0	0	0	0	0	0	0	0	0	0	0	0	0
		W100	0	0	0	0	0	0	0	0	0	0	0	0	0	0	0	0	0
		F199	0	0	0	0	0	0	0	0	0	0	0	0	0	0	0	0	0
		V049	0	0	0	0	0	0	0	0	0	0	0	0	0	0	0	0	0
		L930	0	0	0	0	0	0	0	0	0	0	0	0	0	0	0	0	0
		C480	0	0	0	0	0	0	0	0	0	0	0	0	0	0	0	0	0
		G255	0	0	0	0	0	0	0	0	0	0	0	0	0	0	0	0	0
		E739	0	0	0	0	0	0	0	0	0	0	0	0	0	0	0	0	0
		G419	0	0	0	0	0	0	0	0	0	0	0	0	0	0	0	0	0
		D350	0	0	0	0	0	0	0	0	0	0	0	0	0	0	0	0	0
		D728	0	0	0	0	0	0	0	0	0	0	0	0	0	0	0	0	0
		I370	0	0	0	0	0	0	0	0	0	0	0	0	0	0	0	0	0
		C570	0	0	0	0	0	0	0	0	0	0	0	0	0	0	0	0	0
		K255	0	0	0	0	0	0	0	0	0	0	0	0	0	0	0	0	0
		Q212	0	0	0	0	0	0	0	0	0	0	0	0	0	0	0	0	0
		W070	0	0	0	0	0	0	0	0	0	0	0	0	0	0	0	0	0
		I309	0	0	0	0	0	0	0	0	0	0	0	0	0	0	0	0	0
		G119	0	0	0	0	0	0	0	0	0	0	0	0	0	0	0	0	0
		E859	0	0	0	0	0	0	0	0	0	0	0	0	0	0	0	0	0
		C436	0	0	0	0	0	0	0	0	0	0	0	0	0	0	0	0	0
		D331	0	0	0	0	0	0	0	0	0	0	0	0	0	0	0	0	0
		C320	0	0	0	0	0	0	0	0	0	0	0	0	0	0	0	0	0
		G913	0	0	0	0	0	0	0	0	0	0	0	0	0	0	0	0	0
		B085	0	0	0	0	0	0	0	0	0	0	0	0	0	0	0	0	0
		R571	0	0	0	0	0	0	0	0	0	0	0	0	0	0	0	0	0
		V134	0	0	0	0	0	0	0	0	0	0	0	0	0	0	0	0	0
		M844	0	0	0	0	0	0	0	0	0	0	0	0	0	0	0	0	0
		D447	0	0	0	0	0	0	0	0	0	0	0	0	0	0	0	0	0
		C889	0	0	0	0	0	0	0	0	0	0	0	0	0	0	0	0	0
		D471	0	0	0	0	0	0	0	0	0	0	0	0	0	0	0	0	0
		I849	0	0	0	0	0	0	0	0	0	0	0	0	0	0	0	0	0
		C764	0	0	0	0	0	0	0	0	0	0	0	0	0	0	0	0	0
		K272	0	0	0	0	0	0	0	0	0	0	0	0	0	0	0	0	0
		N921	0	0	0	0	0	0	0	0	0	0	0	0	0	0	0	0	0
		Y269	0	0	0	0	0	0	0	0	0	0	0	0	0	0	0	0	0
		I615	0	0	0	0	0	0	0	0	0	0	0	0	0	0	0	0	0
		K829	0	0	0	0	0	0	0	0	0	0	0	0	0	0	0	0	0
		K573	0	0	0	0	0	0	0	0	0	0	0	0	0	0	0	0	0
		R99	0	0	0	0	0	0	0	0	0	0	0	0	0	0	0	0	0
		C148	0	0	0	0	0	0	0	0	0	0	0	0	0	0	0	0	0
		E750	0	0	0	0	0	0	0	0	0	0	0	0	0	0	0	0	0
		W809	0	0	0	0	0	0	0	0	0	0	0	0	0	0	0	0	0
		D640	0	0	0	0	0	0	0	0	0	0	0	0	0	0	0	0	0
		X832	0	0	0	0	0	0	0	0	0	0	0	0	0	0	0	0	0
		C97	0	0	0	0	0	0	0	0	0	0	0	0	0	0	0	0	0
		G628	0	0	0	0	0	0	0	0	0	0	0	0	0	0	0	0	0
		Q220	0	0	0	0	0	0	0	0	0	0	0	0	0	0	0	0	0
		E702	0	0	0	0	0	0	0	0	0	0	0	0	0	0	0	0	0
		I312	0	0	0	0	0	0	0	0	0	0	0	0	0	0	0	0	0
		J677	0	0	0	0	0	0	0	0	0	0	0	0	0	0	0	0	0
		I808	0	0	0	0	0	0	0	0	0	0	0	0	0	0	0	0	0
		I139	0	0	0	0	0	0	0	0	0	0	0	0	0	0	0	0	0
		V139	0	0	0	0	0	0	0	0	0	0	0	0	0	0	0	0	0
		V809	0	0	0	0	0	0	0	0	0	0	0	0	0	0	0	0	0
		G379	0	0	0	0	0	0	0	0	0	0	0	0	0	0	0	0	0
		K593	0	0	0	0	0	0	0	0	0	0	0	0	0	0	0	0	0
		I091	0	0	0	0	0	0	0	0	0	0	0	0	0	0	0	0	0
		I092	0	0	0	0	0	0	0	0	0	0	0	0	0	0	0	0	0
		E121	0	0	0	0	0	0	0	0	0	0	0	0	0	0	0	0	0
		L932	0	0	0	0	0	0	0	0	0	0	0	0	0	0	0	0	0
		N61	0	0	0	0	0	0	0	0	0	0	0	0	0	0	0	0	0
		M359	0	0	0	0	0	0	0	0	0	0	0	0	0	0	0	0	0
		C409	0	0	0	0	0	0	0	0	0	0	0	0	0	0	0	0	0
		M818	0	0	0	0	0	0	0	0	0	0	0	0	0	0	0	0	0
		N482	0	0	0	0	0	0	0	0	0	0	0	0	0	0	0	0	0
		J384	0	0	0	0	0	0	0	0	0	0	0	0	0	0	0	0	0
		K625	0	0	0	0	0	0	0	0	0	0	0	0	0	0	0	0	0
		K604	0	0	0	0	0	0	0	0	0	0	0	0	0	0	0	0	0
		W059	0	0	0	0	0	0	0	0	0	0	0	0	0	0	0	0	0
		F790	0	0	0	0	0	0	0	0	0	0	0	0	0	0	0	0	0
		K263	0	0	0	0	0	0	0	0	0	0	0	0	0	0	0	0	0
		G588	0	0	0	0	0	0	0	0	0	0	0	0	0	0	0	0	0
		R95	0	0	0	0	0	0	0	0	0	0	0	0	0	0	0	0	0
		Q338	0	0	0	0	0	0	0	0	0	0	0	0	0	0	0	0	0
		I848	0	0	0	0	0	0	0	0	0	0	0	0	0	0	0	0	0
		C380	0	0	0	0	0	0	0	0	0	0	0	0	0	0	0	0	0
		X020	0	0	0	0	0	0	0	0	0	0	0	0	0	0	0	0	0
		G629	0	0	0	0	0	0	0	0	0	0	0	0	0	0	0	0	0
		C139	0	0	0	0	0	0	0	0	0	0	0	0	0	0	0	0	0
		E065	0	0	0	0	0	0	0	0	0	0	0	0	0	0	0	0	0
		I870	0	0	0	0	0	0	0	0	0	0	0	0	0	0	0	0	0
		M852	0	0	0	0	0	0	0	0	0	0	0	0	0	0	0	0	0
		G410	0	0	0	0	0	0	0	0	0	0	0	0	0	0	0	0	0
		G700	0	0	0	0	0	0	0	0	0	0	0	0	0	0	0	0	0
		K629	0	0	0	0	0	0	0	0	0	0	0	0	0	0	0	0	0
		E051	0	0	0	0	0	0	0	0	0	0	0	0	0	0	0	0	0
		M803	0	0	0	0	0	0	0	0	0	0	0	0	0	0	0	0	0
		C459	0	0	0	0	0	0	0	0	0	0	0	0	0	0	0	0	0
		K552	0	0	0	0	0	0	0	0	0	0	0	0	0	0	0	0	0
		W775	0	0	0	0	0	0	0	0	0	0	0	0	0	0	0	0	0
		A428	0	0	0	0	0	0	0	0	0	0	0	0	0	0	0	0	0
		E133	0	0	0	0	0	0	0	0	0	0	0	0	0	0	0	0	0
		X090	0	0	0	0	0	0	0	0	0	0	0	0	0	0	0	0	0
		K404	0	0	0	0	0	0	0	0	0	0	0	0	0	0	0	0	0
		D480	0	0	0	0	0	0	0	0	0	0	0	0	0	0	0	0	0
		I772	0	0	0	0	0	0	0	0	0	0	0	0	0	0	0	0	0
		C184	0	0	0	0	0	0	0	0	0	0	0	0	0	0	0	0	0
		A081	0	0	0	0	0	0	0	0	0	0	0	0	0	0	0	0	0
		D073	0	0	0	0	0	0	0	0	0	0	0	0	0	0	0	0	0
		Y835	0	0	0	0	0	0	0	0	0	0	0	0	0	0	0	0	0
		G822	0	0	0	0	0	0	0	0	0	0	0	0	0	0	0	0	0
		B651	0	0	0	0	0	0	0	0	0	0	0	0	0	0	0	0	0
		Y830	0	0	0	0	0	0	0	0	0	0	0	0	0	0	0	0	0
		E030	0	0	0	0	0	0	0	0	0	0	0	0	0	0	0	0	0
		I878	0	0	0	0	0	0	0	0	0	0	0	0	0	0	0	0	0
		M939	0	0	0	0	0	0	0	0	0	0	0	0	0	0	0	0	0
		Q043	0	0	0	0	0	0	0	0	0	0	0	0	0	0	0	0	0
		F312	0	0	0	0	0	0	0	0	0	0	0	0	0	0	0	0	0
		W194	0	0	0	0	0	0	0	0	0	0	0	0	0	0	0	0	0
		N329	0	0	0	0	0	0	0	0	0	0	0	0	0	0	0	0	0
		W319	0	0	0	0	0	0	0	0	0	0	0	0	0	0	0	0	0
		K661	0	0	0	0	0	0	0	0	0	0	0	0	0	0	0	0	0
		A301	0	0	0	0	0	0	0	0	0	0	0	0	0	0	0	0	0
		W198	0	0	0	0	0	0	0	0	0	0	0	0	0	0	0	0	0
		Y238	0	0	0	0	0	0	0	0	0	0	0	0	0	0	0	0	0
		Q204	0	0	0	0	0	0	0	0	0	0	0	0	0	0	0	0	0
		C340	0	0	0	0	0	0	0	0	0	0	0	0	0	0	0	0	0
		Y312	0	0	0	0	0	0	0	0	0	0	0	0	0	0	0	0	0
		W844	0	0	0	0	0	0	0	0	0	0	0	0	0	0	0	0	0
		N308	0	0	0	0	0	0	0	0	0	0	0	0	0	0	0	0	0
		I310	0	0	0	0	0	0	0	0	0	0	0	0	0	0	0	0	0
		B181	0	0	0	0	0	0	0	0	0	0	0	0	0	0	0	0	0
		I800	0	0	0	0	0	0	0	0	0	0	0	0	0	0	0	0	0
		A084	0	0	0	0	0	0	0	0	0	0	0	0	0	0	0	0	0
		X549	0	0	0	0	0	0	0	0	0	0	0	0	0	0	0	0	0
		C52	0	0	0	0	0	0	0	0	0	0	0	0	0	0	0	0	0
		X010	0	0	0	0	0	0	0	0	0	0	0	0	0	0	0	0	0
		I631	0	0	0	0	0	0	0	0	0	0	0	0	0	0	0	0	0
		K289	0	0	0	0	0	0	0	0	0	0	0	0	0	0	0	0	0
		D180	0	0	0	0	0	0	0	0	0	0	0	0	0	0	0	0	0
		J322	0	0	0	0	0	0	0	0	0	0	0	0	0	0	0	0	0
		J679	0	0	0	0	0	0	0	0	0	0	0	0	0	0	0	0	0
		E210	0	0	0	0	0	0	0	0	0	0	0	0	0	0	0	0	0
		Y044	0	0	0	0	0	0	0	0	0	0	0	0	0	0	0	0	0
		D849	0	0	0	0	0	0	0	0	0	0	0	0	0	0	0	0	0
		G09	0	0	0	0	0	0	0	0	0	0	0	0	0	0	0	0	0
		I361	0	0	0	0	0	0	0	0	0	0	0	0	0	0	0	0	0
		C068	0	0	0	0	0	0	0	0	0	0	0	0	0	0	0	0	0
		D181	0	0	0	0	0	0	0	0	0	0	0	0	0	0	0	0	0
		C152	0	0	0	0	0	0	0	0	0	0	0	0	0	0	0	0	0
		J82	0	0	0	0	0	0	0	0	0	0	0	0	0	0	0	0	0
		X709	0	0	0	0	0	0	0	0	0	0	0	0	0	0	0	0	0
		Y299	0	0	0	0	0	0	0	0	0	0	0	0	0	0	0	0	0
		C185	0	0	0	0	0	0	0	0	0	0	0	0	0	0	0	0	0
		J938	0	0	0	0	0	0	0	0	0	0	0	0	0	0	0	0	0
		D869	0	0	0	0	0	0	0	0	0	0	0	0	0	0	0	0	0
		C720	0	0	0	0	0	0	0	0	0	0	0	0	0	0	0	0	0
		V092	0	0	0	0	0	0	0	0	0	0	0	0	0	0	0	0	0
		M332	0	0	0	0	0	0	0	0	0	0	0	0	0	0	0	0	0
		R688	0	0	0	0	0	0	0	0	0	0	0	0	0	0	0	0	0
		H830	0	0	0	0	0	0	0	0	0	0	0	0	0	0	0	0	0
		K929	0	0	0	0	0	0	0	0	0	0	0	0	0	0	0	0	0
		K228	0	0	0	0	0	0	0	0	0	0	0	0	0	0	0	0	0
		G938	0	0	0	0	0	0	0	0	0	0	0	0	0	0	0	0	0
		B690	0	0	0	0	0	0	0	0	0	0	0	0	0	0	0	0	0
		F333	0	0	0	0	0	0	0	0	0	0	0	0	0	0	0	0	0
		V485	0	0	0	0	0	0	0	0	0	0	0	0	0	0	0	0	0
		I288	0	0	0	0	0	0	0	0	0	0	0	0	0	0	0	0	0
		O882	0	0	0	0	0	0	0	0	0	0	0	0	0	0	0	0	0
		K715	0	0	0	0	0	0	0	0	0	0	0	0	0	0	0	0	0
		B160	0	0	0	0	0	0	0	0	0	0	0	0	0	0	0	0	0
		P291	0	0	0	0	0	0	0	0	0	0	0	0	0	0	0	0	0
		A219	0	0	0	0	0	0	0	0	0	0	0	0	0	0	0	0	0
		L089	0	0	0	0	0	0	0	0	0	0	0	0	0	0	0	0	0
		I708	0	0	0	0	0	0	0	0	0	0	0	0	0	0	0	0	0
		W845	0	0	0	0	0	0	0	0	0	0	0	0	0	0	0	0	0
		A179	0	0	0	0	0	0	0	0	0	0	0	0	0	0	0	0	0
		C445	0	0	0	0	0	0	0	0	0	0	0	0	0	0	0	0	0
		C927	0	0	0	0	0	0	0	0	0	0	0	0	0	0	0	0	0
		C845	0	0	0	0	0	0	0	0	0	0	0	0	0	0	0	0	0
		C749	0	0	0	0	0	0	0	0	0	0	0	0	0	0	0	0	0
		D330	0	0	0	0	0	0	0	0	0	0	0	0	0	0	0	0	0
		B222	0	0	0	0	0	0	0	0	0	0	0	0	0	0	0	0	0
		G373	0	0	0	0	0	0	0	0	0	0	0	0	0	0	0	0	0
		J960	0	0	0	0	0	0	0	0	0	0	0	0	0	0	0	0	0
		X339	0	0	0	0	0	0	0	0	0	0	0	0	0	0	0	0	0
		G610	0	0	0	0	0	0	0	0	0	0	0	0	0	0	0	0	0
		B211	0	0	0	0	0	0	0	0	0	0	0	0	0	0	0	0	0
		R54	0	0	0	0	0	0	0	0	0	0	0	0	0	0	0	0	0
		C699	0	0	0	0	0	0	0	0	0	0	0	0	0	0	0	0	0
		Q054	0	0	0	0	0	0	0	0	0	0	0	0	0	0	0	0	0
		A300	0	0	0	0	0	0	0	0	0	0	0	0	0	0	0	0	0
		C492	0	0	0	0	0	0	0	0	0	0	0	0	0	0	0	0	0
		B59	0	0	0	0	0	0	0	0	0	0	0	0	0	0	0	0	0
		E740	0	0	0	0	0	0	0	0	0	0	0	0	0	0	0	0	0
		F107	0	0	0	0	0	0	0	0	0	0	0	0	0	0	0	0	0
		Q759	0	0	0	0	0	0	0	0	0	0	0	0	0	0	0	0	0
		K449	0	0	0	0	0	0	0	0	0	0	0	0	0	0	0	0	0
		D891	0	0	0	0	0	0	0	0	0	0	0	0	0	0	0	0	0
		Y050	0	0	0	0	0	0	0	0	0	0	0	0	0	0	0	0	0
		C919	0	0	0	0	0	0	0	0	0	0	0	0	0	0	0	0	0
		N359	0	0	0	0	0	0	0	0	0	0	0	0	0	0	0	0	0
		I959	0	0	0	0	0	0	0	0	0	0	0	0	0	0	0	0	0
		F781	0	0	0	0	0	0	0	0	0	0	0	0	0	0	0	0	0
		C700	0	0	0	0	0	0	0	0	0	0	0	0	0	0	0	0	0
		C778	0	0	0	0	0	0	0	0	0	0	0	0	0	0	0	0	0
		D434	0	0	0	0	0	0	0	0	0	0	0	0	0	0	0	0	0
		C403	0	0	0	0	0	0	0	0	0	0	0	0	0	0	0	0	0
		E870	0	0	0	0	0	0	0	0	0	0	0	0	0	0	0	0	0
		E709	0	0	0	0	0	0	0	0	0	0	0	0	0	0	0	0	0
		G619	0	0	0	0	0	0	0	0	0	0	0	0	0	0	0	0	0
		C261	0	0	0	0	0	0	0	0	0	0	0	0	0	0	0	0	0
		E328	0	0	0	0	0	0	0	0	0	0	0	0	0	0	0	0	0
		I601	0	0	0	0	0	0	0	0	0	0	0	0	0	0	0	0	0
		J152	0	0	0	0	0	0	0	0	0	0	0	0	0	0	0	0	0
		E02	0	0	0	0	0	0	0	0	0	0	0	0	0	0	0	0	0
		I501	0	0	0	0	0	0	0	0	0	0	0	0	0	0	0	0	0
		C162	0	0	0	0	0	0	0	0	0	0	0	0	0	0	0	0	0
		B500	0	0	0	0	0	0	0	0	0	0	0	0	0	0	0	0	0
		B232	0	0	0	0	0	0	0	0	0	0	0	0	0	0	0	0	0
		E538	0	0	0	0	0	0	0	0	0	0	0	0	0	0	0	0	0
		X000	0	0	0	0	0	0	0	0	0	0	0	0	0	0	0	0	0
		G959	0	0	0	0	0	0	0	0	0	0	0	0	0	0	0	0	0
		Y831	0	0	0	0	0	0	0	0	0	0	0	0	0	0	0	0	0
		M352	0	0	0	0	0	0	0	0	0	0	0	0	0	0	0	0	0
		E069	0	0	0	0	0	0	0	0	0	0	0	0	0	0	0	0	0
		N210	0	0	0	0	0	0	0	0	0	0	0	0	0	0	0	0	0
		O16	0	0	0	0	0	0	0	0	0	0	0	0	0	0	0	0	0
		K831	0	0	0	0	0	0	0	0	0	0	0	0	0	0	0	0	0
		N321	0	0	0	0	0	0	0	0	0	0	0	0	0	0	0	0	0
		G98	0	0	0	0	0	0	0	0	0	0	0	0	0	0	0	0	0
		K122	0	0	0	0	0	0	0	0	0	0	0	0	0	0	0	0	0
		F443	0	0	0	0	0	0	0	0	0	0	0	0	0	0	0	0	0
		X080	0	0	0	0	0	0	0	0	0	0	0	0	0	0	0	0	0
		C850	0	0	0	0	0	0	0	0	0	0	0	0	0	0	0	0	0
		V685	0	0	0	0	0	0	0	0	0	0	0	0	0	0	0	0	0
		Q790	0	0	0	0	0	0	0	0	0	0	0	0	0	0	0	0	0
		W850	0	0	0	0	0	0	0	0	0	0	0	0	0	0	0	0	0
		C688	0	0	0	0	0	0	0	0	0	0	0	0	0	0	0	0	0
		Q612	0	0	0	0	0	0	0	0	0	0	0	0	0	0	0	0	0
		N820	0	0	0	0	0	0	0	0	0	0	0	0	0	0	0	0	0
		Q231	0	0	0	0	0	0	0	0	0	0	0	0	0	0	0	0	0
		K900	0	0	0	0	0	0	0	0	0	0	0	0	0	0	0	0	0
		E160	0	0	0	0	0	0	0	0	0	0	0	0	0	0	0	0	0
		M418	0	0	0	0	0	0	0	0	0	0	0	0	0	0	0	0	0
		M478	0	0	0	0	0	0	0	0	0	0	0	0	0	0	0	0	0
		G249	0	0	0	0	0	0	0	0	0	0	0	0	0	0	0	0	0
		W839	0	0	0	0	0	0	0	0	0	0	0	0	0	0	0	0	0
		I610	0	0	0	0	0	0	0	0	0	0	0	0	0	0	0	0	0
		B949	0	0	0	0	0	0	0	0	0	0	0	0	0	0	0	0	0
		D449	0	0	0	0	0	0	0	0	0	0	0	0	0	0	0	0	0
		N139	0	0	0	0	0	0	0	0	0	0	0	0	0	0	0	0	0
		E259	0	0	0	0	0	0	0	0	0	0	0	0	0	0	0	0	0
		E161	0	0	0	0	0	0	0	0	0	0	0	0	0	0	0	0	0
		D70	0	0	0	0	0	0	0	0	0	0	0	0	0	0	0	0	0
		C060	0	0	0	0	0	0	0	0	0	0	0	0	0	0	0	0	0
		C689	0	0	0	0	0	0	0	0	0	0	0	0	0	0	0	0	0
		C716	0	0	0	0	0	0	0	0	0	0	0	0	0	0	0	0	0
		I018	0	0	0	0	0	0	0	0	0	0	0	0	0	0	0	0	0
		Y119	0	0	0	0	0	0	0	0	0	0	0	0	0	0	0	0	0
		C251	0	0	0	0	0	0	0	0	0	0	0	0	0	0	0	0	0
		D391	0	0	0	0	0	0	0	0	0	0	0	0	0	0	0	0	0
		B650	0	0	0	0	0	0	0	0	0	0	0	0	0	0	0	0	0
		O151	0	0	0	0	0	0	0	0	0	0	0	0	0	0	0	0	0
		E807	0	0	0	0	0	0	0	0	0	0	0	0	0	0	0	0	0
		B779	0	0	0	0	0	0	0	0	0	0	0	0	0	0	0	0	0
		X474	0	0	0	0	0	0	0	0	0	0	0	0	0	0	0	0	0
		X208	0	0	0	0	0	0	0	0	0	0	0	0	0	0	0	0	0
		F051	0	0	0	0	0	0	0	0	0	0	0	0	0	0	0	0	0
		Q224	0	0	0	0	0	0	0	0	0	0	0	0	0	0	0	0	0
		C792	0	0	0	0	0	0	0	0	0	0	0	0	0	0	0	0	0
		F163	0	0	0	0	0	0	0	0	0	0	0	0	0	0	0	0	0
		A260	0	0	0	0	0	0	0	0	0	0	0	0	0	0	0	0	0
		L033	0	0	0	0	0	0	0	0	0	0	0	0	0	0	0	0	0
		K260	0	0	0	0	0	0	0	0	0	0	0	0	0	0	0	0	0
		B206	0	0	0	0	0	0	0	0	0	0	0	0	0	0	0	0	0
		N134	0	0	0	0	0	0	0	0	0	0	0	0	0	0	0	0	0
		C931	0	0	0	0	0	0	0	0	0	0	0	0	0	0	0	0	0
		Q605	0	0	0	0	0	0	0	0	0	0	0	0	0	0	0	0	0
		G10	0	0	0	0	0	0	0	0	0	0	0	0	0	0	0	0	0
		I130	0	0	0	0	0	0	0	0	0	0	0	0	0	0	0	0	0
		I512	0	0	0	0	0	0	0	0	0	0	0	0	0	0	0	0	0
		E743	0	0	0	0	0	0	0	0	0	0	0	0	0	0	0	0	0
		N719	0	0	0	0	0	0	0	0	0	0	0	0	0	0	0	0	0
		A047	0	0	0	0	0	0	0	0	0	0	0	0	0	0	0	0	0
		Q632	0	0	0	0	0	0	0	0	0	0	0	0	0	0	0	0	0
		X449	0	0	0	0	0	0	0	0	0	0	0	0	0	0	0	0	0
		X970	0	0	0	0	0	0	0	0	0	0	0	0	0	0	0	0	0
		N422	0	0	0	0	0	0	0	0	0	0	0	0	0	0	0	0	0
		I490	0	0	0	0	0	0	0	0	0	0	0	0	0	0	0	0	0
		D448	0	0	0	0	0	0	0	0	0	0	0	0	0	0	0	0	0
		I722	0	0	0	0	0	0	0	0	0	0	0	0	0	0	0	0	0
		E033	0	0	0	0	0	0	0	0	0	0	0	0	0	0	0	0	0
		F320	0	0	0	0	0	0	0	0	0	0	0	0	0	0	0	0	0
		V239	0	0	0	0	0	0	0	0	0	0	0	0	0	0	0	0	0
		I072	0	0	0	0	0	0	0	0	0	0	0	0	0	0	0	0	0
		V265	0	0	0	0	0	0	0	0	0	0	0	0	0	0	0	0	0
		V899	0	0	0	0	0	0	0	0	0	0	0	0	0	0	0	0	0
		B378	0	0	0	0	0	0	0	0	0	0	0	0	0	0	0	0	0
		D589	0	0	0	0	0	0	0	0	0	0	0	0	0	0	0	0	0
		W670	0	0	0	0	0	0	0	0	0	0	0	0	0	0	0	0	0
		Q640	0	0	0	0	0	0	0	0	0	0	0	0	0	0	0	0	0
		Q244	0	0	0	0	0	0	0	0	0	0	0	0	0	0	0	0	0
		Q874	0	0	0	0	0	0	0	0	0	0	0	0	0	0	0	0	0
		C248	0	0	0	0	0	0	0	0	0	0	0	0	0	0	0	0	0
		Y288	0	0	0	0	0	0	0	0	0	0	0	0	0	0	0	0	0
		I890	0	0	0	0	0	0	0	0	0	0	0	0	0	0	0	0	0
		N142	0	0	0	0	0	0	0	0	0	0	0	0	0	0	0	0	0
		B209	0	0	0	0	0	0	0	0	0	0	0	0	0	0	0	0	0
		A427	0	0	0	0	0	0	0	0	0	0	0	0	0	0	0	0	0
		P240	0	0	0	0	0	0	0	0	0	0	0	0	0	0	0	0	0
		Q225	0	0	0	0	0	0	0	0	0	0	0	0	0	0	0	0	0
		I070	0	0	0	0	0	0	0	0	0	0	0	0	0	0	0	0	0
		X500	0	0	0	0	0	0	0	0	0	0	0	0	0	0	0	0	0
		G049	0	0	0	0	0	0	0	0	0	0	0	0	0	0	0	0	0
		Q349	0	0	0	0	0	0	0	0	0	0	0	0	0	0	0	0	0
		X419	0	0	0	0	0	0	0	0	0	0	0	0	0	0	0	0	0
		F169	0	0	0	0	0	0	0	0	0	0	0	0	0	0	0	0	0
		I801	0	0	0	0	0	0	0	0	0	0	0	0	0	0	0	0	0
		E888	0	0	0	0	0	0	0	0	0	0	0	0	0	0	0	0	0
		M469	0	0	0	0	0	0	0	0	0	0	0	0	0	0	0	0	0
		K823	0	0	0	0	0	0	0	0	0	0	0	0	0	0	0	0	0
		F710	0	0	0	0	0	0	0	0	0	0	0	0	0	0	0	0	0
		E271	0	0	0	0	0	0	0	0	0	0	0	0	0	0	0	0	0
		G318	0	0	0	0	0	0	0	0	0	0	0	0	0	0	0	0	0
		F069	0	0	0	0	0	0	0	0	0	0	0	0	0	0	0	0	0
		C400	0	0	0	0	0	0	0	0	0	0	0	0	0	0	0	0	0
		G310	0	0	0	0	0	0	0	0	0	0	0	0	0	0	0	0	0
		G969	0	0	0	0	0	0	0	0	0	0	0	0	0	0	0	0	0
		O11	0	0	0	0	0	0	0	0	0	0	0	0	0	0	0	0	0
		Y344	0	0	0	0	0	0	0	0	0	0	0	0	0	0	0	0	0
		G009	0	0	0	0	0	0	0	0	0	0	0	0	0	0	0	0	0
		M068	0	0	0	0	0	0	0	0	0	0	0	0	0	0	0	0	0
		K632	0	0	0	0	0	0	0	0	0	0	0	0	0	0	0	0	0
		L509	0	0	0	0	0	0	0	0	0	0	0	0	0	0	0	0	0
		C447	0	0	0	0	0	0	0	0	0	0	0	0	0	0	0	0	0
		X952	0	0	0	0	0	0	0	0	0	0	0	0	0	0	0	0	0
		C829	0	0	0	0	0	0	0	0	0	0	0	0	0	0	0	0	0
		K419	0	0	0	0	0	0	0	0	0	0	0	0	0	0	0	0	0
		L059	0	0	0	0	0	0	0	0	0	0	0	0	0	0	0	0	0
		V124	0	0	0	0	0	0	0	0	0	0	0	0	0	0	0	0	0
		Y339	0	0	0	0	0	0	0	0	0	0	0	0	0	0	0	0	0
		M179	0	0	0	0	0	0	0	0	0	0	0	0	0	0	0	0	0
		A811	0	0	0	0	0	0	0	0	0	0	0	0	0	0	0	0	0
		Q243	0	0	0	0	0	0	0	0	0	0	0	0	0	0	0	0	0
		I740	0	0	0	0	0	0	0	0	0	0	0	0	0	0	0	0	0
		J312	0	0	0	0	0	0	0	0	0	0	0	0	0	0	0	0	0
		V039	0	0	0	0	0	0	0	0	0	0	0	0	0	0	0	0	0
		V029	0	0	0	0	0	0	0	0	0	0	0	0	0	0	0	0	0
		I632	0	0	0	0	0	0	0	0	0	0	0	0	0	0	0	0	0
		M623	0	0	0	0	0	0	0	0	0	0	0	0	0	0	0	0	0
		O150	0	0	0	0	0	0	0	0	0	0	0	0	0	0	0	0	0
		C300	0	0	0	0	0	0	0	0	0	0	0	0	0	0	0	0	0
		P393	0	0	0	0	0	0	0	0	0	0	0	0	0	0	0	0	0
		N071	0	0	0	0	0	0	0	0	0	0	0	0	0	0	0	0	0
		N250	0	0	0	0	0	0	0	0	0	0	0	0	0	0	0	0	0
		L038	0	0	0	0	0	0	0	0	0	0	0	0	0	0	0	0	0
		C411	0	0	0	0	0	0	0	0	0	0	0	0	0	0	0	0	0
		L989	0	0	0	0	0	0	0	0	0	0	0	0	0	0	0	0	0
		F195	0	0	0	0	0	0	0	0	0	0	0	0	0	0	0	0	0
		N814	0	0	0	0	0	0	0	0	0	0	0	0	0	0	0	0	0
		G838	0	0	0	0	0	0	0	0	0	0	0	0	0	0	0	0	0
		V199	0	0	0	0	0	0	0	0	0	0	0	0	0	0	0	0	0
		I822	0	0	0	0	0	0	0	0	0	0	0	0	0	0	0	0	0
		D735	0	0	0	0	0	0	0	0	0	0	0	0	0	0	0	0	0
		M809	0	0	0	0	0	0	0	0	0	0	0	0	0	0	0	0	0
		B889	0	0	0	0	0	0	0	0	0	0	0	0	0	0	0	0	0
		F058	0	0	0	0	0	0	0	0	0	0	0	0	0	0	0	0	0
		A022	0	0	0	0	0	0	0	0	0	0	0	0	0	0	0	0	0
		W697	0	0	0	0	0	0	0	0	0	0	0	0	0	0	0	0	0
		J60	0	0	0	0	0	0	0	0	0	0	0	0	0	0	0	0	0
		F140	0	0	0	0	0	0	0	0	0	0	0	0	0	0	0	0	0
		E229	0	0	0	0	0	0	0	0	0	0	0	0	0	0	0	0	0
		Q200	0	0	0	0	0	0	0	0	0	0	0	0	0	0	0	0	0
		D097	0	0	0	0	0	0	0	0	0	0	0	0	0	0	0	0	0
		I371	0	0	0	0	0	0	0	0	0	0	0	0	0	0	0	0	0
		W782	0	0	0	0	0	0	0	0	0	0	0	0	0	0	0	0	0
		D370	0	0	0	0	0	0	0	0	0	0	0	0	0	0	0	0	0
		Q788	0	0	0	0	0	0	0	0	0	0	0	0	0	0	0	0	0
		G723	0	0	0	0	0	0	0	0	0	0	0	0	0	0	0	0	0
		Y872	0	0	0	0	0	0	0	0	0	0	0	0	0	0	0	0	0
		K811	0	0	0	0	0	0	0	0	0	0	0	0	0	0	0	0	0
		V575	0	0	0	0	0	0	0	0	0	0	0	0	0	0	0	0	0
		B269	0	0	0	0	0	0	0	0	0	0	0	0	0	0	0	0	0
		B205	0	0	0	0	0	0	0	0	0	0	0	0	0	0	0	0	0
		C343	0	0	0	0	0	0	0	0	0	0	0	0	0	0	0	0	0
		W699	0	0	0	0	0	0	0	0	0	0	0	0	0	0	0	0	0
		B402	0	0	0	0	0	0	0	0	0	0	0	0	0	0	0	0	0
		Y084	0	0	0	0	0	0	0	0	0	0	0	0	0	0	0	0	0
		Q619	0	0	0	0	0	0	0	0	0	0	0	0	0	0	0	0	0
		B218	0	0	0	0	0	0	0	0	0	0	0	0	0	0	0	0	0
		D485	0	0	0	0	0	0	0	0	0	0	0	0	0	0	0	0	0
		J684	0	0	0	0	0	0	0	0	0	0	0	0	0	0	0	0	0
		C504	0	0	0	0	0	0	0	0	0	0	0	0	0	0	0	0	0
		C783	0	0	0	0	0	0	0	0	0	0	0	0	0	0	0	0	0
		E738	0	0	0	0	0	0	0	0	0	0	0	0	0	0	0	0	0
		L109	0	0	0	0	0	0	0	0	0	0	0	0	0	0	0	0	0
		C258	0	0	0	0	0	0	0	0	0	0	0	0	0	0	0	0	0
		F250	0	0	0	0	0	0	0	0	0	0	0	0	0	0	0	0	0
		C437	0	0	0	0	0	0	0	0	0	0	0	0	0	0	0	0	0
		Y579	0	0	0	0	0	0	0	0	0	0	0	0	0	0	0	0	0
		F171	0	0	0	0	0	0	0	0	0	0	0	0	0	0	0	0	0
		D681	0	0	0	0	0	0	0	0	0	0	0	0	0	0	0	0	0
		I898	0	0	0	0	0	0	0	0	0	0	0	0	0	0	0	0	0
		X330	0	0	0	0	0	0	0	0	0	0	0	0	0	0	0	0	0
		O141	0	0	0	0	0	0	0	0	0	0	0	0	0	0	0	0	0
		M103	0	0	0	0	0	0	0	0	0	0	0	0	0	0	0	0	0
		M509	0	0	0	0	0	0	0	0	0	0	0	0	0	0	0	0	0
		F323	0	0	0	0	0	0	0	0	0	0	0	0	0	0	0	0	0
		E040	0	0	0	0	0	0	0	0	0	0	0	0	0	0	0	0	0
		A020	0	0	0	0	0	0	0	0	0	0	0	0	0	0	0	0	0
		P219	0	0	0	0	0	0	0	0	0	0	0	0	0	0	0	0	0
		L039	0	0	0	0	0	0	0	0	0	0	0	0	0	0	0	0	0
		C441	0	0	0	0	0	0	0	0	0	0	0	0	0	0	0	0	0
		W694	0	0	0	0	0	0	0	0	0	0	0	0	0	0	0	0	0
		O235	0	0	0	0	0	0	0	0	0	0	0	0	0	0	0	0	0
		E68	0	0	0	0	0	0	0	0	0	0	0	0	0	0	0	0	0
		N138	0	0	0	0	0	0	0	0	0	0	0	0	0	0	0	0	0
		X648	0	0	0	0	0	0	0	0	0	0	0	0	0	0	0	0	0
		F29	0	0	0	0	0	0	0	0	0	0	0	0	0	0	0	0	0
		E169	0	0	0	0	0	0	0	0	0	0	0	0	0	0	0	0	0
		Y850	0	0	0	0	0	0	0	0	0	0	0	0	0	0	0	0	0
		G713	0	0	0	0	0	0	0	0	0	0	0	0	0	0	0	0	0
		N759	0	0	0	0	0	0	0	0	0	0	0	0	0	0	0	0	0
		N038	0	0	0	0	0	0	0	0	0	0	0	0	0	0	0	0	0
		D374	0	0	0	0	0	0	0	0	0	0	0	0	0	0	0	0	0
		C119	0	0	0	0	0	0	0	0	0	0	0	0	0	0	0	0	0
		E103	0	0	0	0	0	0	0	0	0	0	0	0	0	0	0	0	0
		J698	0	0	0	0	0	0	0	0	0	0	0	0	0	0	0	0	0
		K717	0	0	0	0	0	0	0	0	0	0	0	0	0	0	0	0	0
		I308	0	0	0	0	0	0	0	0	0	0	0	0	0	0	0	0	0
		I318	0	0	0	0	0	0	0	0	0	0	0	0	0	0	0	0	0
		C768	0	0	0	0	0	0	0	0	0	0	0	0	0	0	0	0	0
		W109	0	0	0	0	0	0	0	0	0	0	0	0	0	0	0	0	0
		W148	0	0	0	0	0	0	0	0	0	0	0	0	0	0	0	0	0
		Q875	0	0	0	0	0	0	0	0	0	0	0	0	0	0	0	0	0
		N009	0	0	0	0	0	0	0	0	0	0	0	0	0	0	0	0	0
		C945	0	0	0	0	0	0	0	0	0	0	0	0	0	0	0	0	0
		Q201	0	0	0	0	0	0	0	0	0	0	0	0	0	0	0	0	0
		E125	0	0	0	0	0	0	0	0	0	0	0	0	0	0	0	0	0
		Y190	0	0	0	0	0	0	0	0	0	0	0	0	0	0	0	0	0
		E755	0	0	0	0	0	0	0	0	0	0	0	0	0	0	0	0	0
		X641	0	0	0	0	0	0	0	0	0	0	0	0	0	0	0	0	0
		Q282	0	0	0	0	0	0	0	0	0	0	0	0	0	0	0	0	0
		Y120	0	0	0	0	0	0	0	0	0	0	0	0	0	0	0	0	0
		D069	0	0	0	0	0	0	0	0	0	0	0	0	0	0	0	0	0
		C540	0	0	0	0	0	0	0	0	0	0	0	0	0	0	0	0	0
		A819	0	0	0	0	0	0	0	0	0	0	0	0	0	0	0	0	0
		D380	0	0	0	0	0	0	0	0	0	0	0	0	0	0	0	0	0
		E215	0	0	0	0	0	0	0	0	0	0	0	0	0	0	0	0	0
		D371	0	0	0	0	0	0	0	0	0	0	0	0	0	0	0	0	0
		G450	0	0	0	0	0	0	0	0	0	0	0	0	0	0	0	0	0
		F328	0	0	0	0	0	0	0	0	0	0	0	0	0	0	0	0	0
		N498	0	0	0	0	0	0	0	0	0	0	0	0	0	0	0	0	0
		A490	0	0	0	0	0	0	0	0	0	0	0	0	0	0	0	0	0
		X850	0	0	0	0	0	0	0	0	0	0	0	0	0	0	0	0	0
		A400	0	0	0	0	0	0	0	0	0	0	0	0	0	0	0	0	0
		A304	0	0	0	0	0	0	0	0	0	0	0	0	0	0	0	0	0
		F259	0	0	0	0	0	0	0	0	0	0	0	0	0	0	0	0	0
		J153	0	0	0	0	0	0	0	0	0	0	0	0	0	0	0	0	0
		D239	0	0	0	0	0	0	0	0	0	0	0	0	0	0	0	0	0
		F439	0	0	0	0	0	0	0	0	0	0	0	0	0	0	0	0	0
		M082	0	0	0	0	0	0	0	0	0	0	0	0	0	0	0	0	0
		I720	0	0	0	0	0	0	0	0	0	0	0	0	0	0	0	0	0
		W747	0	0	0	0	0	0	0	0	0	0	0	0	0	0	0	0	0
		C319	0	0	0	0	0	0	0	0	0	0	0	0	0	0	0	0	0
		K281	0	0	0	0	0	0	0	0	0	0	0	0	0	0	0	0	0
		K223	0	0	0	0	0	0	0	0	0	0	0	0	0	0	0	0	0
		I471	0	0	0	0	0	0	0	0	0	0	0	0	0	0	0	0	0
		P269	0	0	0	0	0	0	0	0	0	0	0	0	0	0	0	0	0
		M159	0	0	0	0	0	0	0	0	0	0	0	0	0	0	0	0	0
		Y451	0	0	0	0	0	0	0	0	0	0	0	0	0	0	0	0	0
		C901	0	0	0	0	0	0	0	0	0	0	0	0	0	0	0	0	0
		D699	0	0	0	0	0	0	0	0	0	0	0	0	0	0	0	0	0
		I692	0	0	0	0	0	0	0	0	0	0	0	0	0	0	0	0	0
		I864	0	0	0	0	0	0	0	0	0	0	0	0	0	0	0	0	0
		Y140	0	0	0	0	0	0	0	0	0	0	0	0	0	0	0	0	0
		C767	0	0	0	0	0	0	0	0	0	0	0	0	0	0	0	0	0
		W229	0	0	0	0	0	0	0	0	0	0	0	0	0	0	0	0	0
		W999	0	0	0	0	0	0	0	0	0	0	0	0	0	0	0	0	0
		J931	0	0	0	0	0	0	0	0	0	0	0	0	0	0	0	0	0
		M191	0	0	0	0	0	0	0	0	0	0	0	0	0	0	0	0	0
		M899	0	0	0	0	0	0	0	0	0	0	0	0	0	0	0	0	0
		D688	0	0	0	0	0	0	0	0	0	0	0	0	0	0	0	0	0
		Q336	0	0	0	0	0	0	0	0	0	0	0	0	0	0	0	0	0
		F788	0	0	0	0	0	0	0	0	0	0	0	0	0	0	0	0	0
		V182	0	0	0	0	0	0	0	0	0	0	0	0	0	0	0	0	0
		I311	0	0	0	0	0	0	0	0	0	0	0	0	0	0	0	0	0
		E500	0	0	0	0	0	0	0	0	0	0	0	0	0	0	0	0	0
		V496	0	0	0	0	0	0	0	0	0	0	0	0	0	0	0	0	0
		I788	0	0	0	0	0	0	0	0	0	0	0	0	0	0	0	0	0
		C049	0	0	0	0	0	0	0	0	0	0	0	0	0	0	0	0	0
		M052	0	0	0	0	0	0	0	0	0	0	0	0	0	0	0	0	0
		C670	0	0	0	0	0	0	0	0	0	0	0	0	0	0	0	0	0
		C435	0	0	0	0	0	0	0	0	0	0	0	0	0	0	0	0	0
		C602	0	0	0	0	0	0	0	0	0	0	0	0	0	0	0	0	0
		F319	0	0	0	0	0	0	0	0	0	0	0	0	0	0	0	0	0
		J029	0	0	0	0	0	0	0	0	0	0	0	0	0	0	0	0	0
		E211	0	0	0	0	0	0	0	0	0	0	0	0	0	0	0	0	0
		K628	0	0	0	0	0	0	0	0	0	0	0	0	0	0	0	0	0
		I082	0	0	0	0	0	0	0	0	0	0	0	0	0	0	0	0	0
		G404	0	0	0	0	0	0	0	0	0	0	0	0	0	0	0	0	0
		C469	0	0	0	0	0	0	0	0	0	0	0	0	0	0	0	0	0
		C091	0	0	0	0	0	0	0	0	0	0	0	0	0	0	0	0	0
		C922	0	0	0	0	0	0	0	0	0	0	0	0	0	0	0	0	0
		C914	0	0	0	0	0	0	0	0	0	0	0	0	0	0	0	0	0
		O742	0	0	0	0	0	0	0	0	0	0	0	0	0	0	0	0	0
		D610	0	0	0	0	0	0	0	0	0	0	0	0	0	0	0	0	0
		W840	0	0	0	0	0	0	0	0	0	0	0	0	0	0	0	0	0
		V693	0	0	0	0	0	0	0	0	0	0	0	0	0	0	0	0	0
		M45	0	0	0	0	0	0	0	0	0	0	0	0	0	0	0	0	0
		I408	0	0	0	0	0	0	0	0	0	0	0	0	0	0	0	0	0
		Y142	0	0	0	0	0	0	0	0	0	0	0	0	0	0	0	0	0
		E15	0	0	0	0	0	0	0	0	0	0	0	0	0	0	0	0	0
		D015	0	0	0	0	0	0	0	0	0	0	0	0	0	0	0	0	0
		D059	0	0	0	0	0	0	0	0	0	0	0	0	0	0	0	0	0
		D049	0	0	0	0	0	0	0	0	0	0	0	0	0	0	0	0	0
		Y575	0	0	0	0	0	0	0	0	0	0	0	0	0	0	0	0	0
		Y330	0	0	0	0	0	0	0	0	0	0	0	0	0	0	0	0	0
		F410	0	0	0	0	0	0	0	0	0	0	0	0	0	0	0	0	0
		W169	0	0	0	0	0	0	0	0	0	0	0	0	0	0	0	0	0
		Y149	0	0	0	0	0	0	0	0	0	0	0	0	0	0	0	0	0
		L511	0	0	0	0	0	0	0	0	0	0	0	0	0	0	0	0	0
		C438	0	0	0	0	0	0	0	0	0	0	0	0	0	0	0	0	0
		V902	0	0	0	0	0	0	0	0	0	0	0	0	0	0	0	0	0
		K740	0	0	0	0	0	0	0	0	0	0	0	0	0	0	0	0	0
		X934	0	0	0	0	0	0	0	0	0	0	0	0	0	0	0	0	0
		M622	0	0	0	0	0	0	0	0	0	0	0	0	0	0	0	0	0
		X448	0	0	0	0	0	0	0	0	0	0	0	0	0	0	0	0	0
		X848	0	0	0	0	0	0	0	0	0	0	0	0	0	0	0	0	0
		Y636	0	0	0	0	0	0	0	0	0	0	0	0	0	0	0	0	0
		D043	0	0	0	0	0	0	0	0	0	0	0	0	0	0	0	0	0
		E722	0	0	0	0	0	0	0	0	0	0	0	0	0	0	0	0	0
		K520	0	0	0	0	0	0	0	0	0	0	0	0	0	0	0	0	0
		Q917	0	0	0	0	0	0	0	0	0	0	0	0	0	0	0	0	0
		Y340	0	0	0	0	0	0	0	0	0	0	0	0	0	0	0	0	0
		O995	0	0	0	0	0	0	0	0	0	0	0	0	0	0	0	0	0
		K271	0	0	0	0	0	0	0	0	0	0	0	0	0	0	0	0	0
		A188	0	0	0	0	0	0	0	0	0	0	0	0	0	0	0	0	0
		W012	0	0	0	0	0	0	0	0	0	0	0	0	0	0	0	0	0
		F118	0	0	0	0	0	0	0	0	0	0	0	0	0	0	0	0	0
		K591	0	0	0	0	0	0	0	0	0	0	0	0	0	0	0	0	0
		G900	0	0	0	0	0	0	0	0	0	0	0	0	0	0	0	0	0
		D099	0	0	0	0	0	0	0	0	0	0	0	0	0	0	0	0	0
		E060	0	0	0	0	0	0	0	0	0	0	0	0	0	0	0	0	0
		I159	0	0	0	0	0	0	0	0	0	0	0	0	0	0	0	0	0
		P969	0	0	0	0	0	0	0	0	0	0	0	0	0	0	0	0	0
		M513	0	0	0	0	0	0	0	0	0	0	0	0	0	0	0	0	0
		C150	0	0	0	0	0	0	0	0	0	0	0	0	0	0	0	0	0
		I888	0	0	0	0	0	0	0	0	0	0	0	0	0	0	0	0	0
		F419	0	0	0	0	0	0	0	0	0	0	0	0	0	0	0	0	0
		Q878	0	0	0	0	0	0	0	0	0	0	0	0	0	0	0	0	0
		X452	0	0	0	0	0	0	0	0	0	0	0	0	0	0	0	0	0
		E617	0	0	0	0	0	0	0	0	0	0	0	0	0	0	0	0	0
		A412	0	0	0	0	0	0	0	0	0	0	0	0	0	0	0	0	0
		N818	0	0	0	0	0	0	0	0	0	0	0	0	0	0	0	0	0
		K210	0	0	0	0	0	0	0	0	0	0	0	0	0	0	0	0	0
		G600	0	0	0	0	0	0	0	0	0	0	0	0	0	0	0	0	0
		J930	0	0	0	0	0	0	0	0	0	0	0	0	0	0	0	0	0
		C268	0	0	0	0	0	0	0	0	0	0	0	0	0	0	0	0	0
		O039	0	0	0	0	0	0	0	0	0	0	0	0	0	0	0	0	0
		X099	0	0	0	0	0	0	0	0	0	0	0	0	0	0	0	0	0
		F449	0	0	0	0	0	0	0	0	0	0	0	0	0	0	0	0	0
		K603	0	0	0	0	0	0	0	0	0	0	0	0	0	0	0	0	0
		O152	0	0	0	0	0	0	0	0	0	0	0	0	0	0	0	0	0
		A562	0	0	0	0	0	0	0	0	0	0	0	0	0	0	0	0	0
		N490	0	0	0	0	0	0	0	0	0	0	0	0	0	0	0	0	0
		G418	0	0	0	0	0	0	0	0	0	0	0	0	0	0	0	0	0
		Q872	0	0	0	0	0	0	0	0	0	0	0	0	0	0	0	0	0
		C040	0	0	0	0	0	0	0	0	0	0	0	0	0	0	0	0	0
		D751	0	0	0	0	0	0	0	0	0	0	0	0	0	0	0	0	0
		F148	0	0	0	0	0	0	0	0	0	0	0	0	0	0	0	0	0
		I401	0	0	0	0	0	0	0	0	0	0	0	0	0	0	0	0	0
		M432	0	0	0	0	0	0	0	0	0	0	0	0	0	0	0	0	0
		G239	0	0	0	0	0	0	0	0	0	0	0	0	0	0	0	0	0
		J385	0	0	0	0	0	0	0	0	0	0	0	0	0	0	0	0	0
		K627	0	0	0	0	0	0	0	0	0	0	0	0	0	0	0	0	0
		X232	0	0	0	0	0	0	0	0	0	0	0	0	0	0	0	0	0
		Q230	0	0	0	0	0	0	0	0	0	0	0	0	0	0	0	0	0
		B332	0	0	0	0	0	0	0	0	0	0	0	0	0	0	0	0	0
		C574	0	0	0	0	0	0	0	0	0	0	0	0	0	0	0	0	0
		D179	0	0	0	0	0	0	0	0	0	0	0	0	0	0	0	0	0
		X799	0	0	0	0	0	0	0	0	0	0	0	0	0	0	0	0	0
		C578	0	0	0	0	0	0	0	0	0	0	0	0	0	0	0	0	0
		V189	0	0	0	0	0	0	0	0	0	0	0	0	0	0	0	0	0
		R008	0	0	0	0	0	0	0	0	0	0	0	0	0	0	0	0	0
		D159	0	0	0	0	0	0	0	0	0	0	0	0	0	0	0	0	0
		K761	0	0	0	0	0	0	0	0	0	0	0	0	0	0	0	0	0
		I871	0	0	0	0	0	0	0	0	0	0	0	0	0	0	0	0	0
		C401	0	0	0	0	0	0	0	0	0	0	0	0	0	0	0	0	0
		L021	0	0	0	0	0	0	0	0	0	0	0	0	0	0	0	0	0
		J391	0	0	0	0	0	0	0	0	0	0	0	0	0	0	0	0	0
		G473	0	0	0	0	0	0	0	0	0	0	0	0	0	0	0	0	0
		G808	0	0	0	0	0	0	0	0	0	0	0	0	0	0	0	0	0
		V849	0	0	0	0	0	0	0	0	0	0	0	0	0	0	0	0	0
		A89	0	0	0	0	0	0	0	0	0	0	0	0	0	0	0	0	0
		K660	0	0	0	0	0	0	0	0	0	0	0	0	0	0	0	0	0
		G712	0	0	0	0	0	0	0	0	0	0	0	0	0	0	0	0	0
		C924	0	0	0	0	0	0	0	0	0	0	0	0	0	0	0	0	0
		F182	0	0	0	0	0	0	0	0	0	0	0	0	0	0	0	0	0
		K828	0	0	0	0	0	0	0	0	0	0	0	0	0	0	0	0	0
		P290	0	0	0	0	0	0	0	0	0	0	0	0	0	0	0	0	0
		C222	0	0	0	0	0	0	0	0	0	0	0	0	0	0	0	0	0
		F252	0	0	0	0	0	0	0	0	0	0	0	0	0	0	0	0	0
		J040	0	0	0	0	0	0	0	0	0	0	0	0	0	0	0	0	0
		W297	0	0	0	0	0	0	0	0	0	0	0	0	0	0	0	0	0
		X508	0	0	0	0	0	0	0	0	0	0	0	0	0	0	0	0	0
		M064	0	0	0	0	0	0	0	0	0	0	0	0	0	0	0	0	0
		M300	0	0	0	0	0	0	0	0	0	0	0	0	0	0	0	0	0
		I899	0	0	0	0	0	0	0	0	0	0	0	0	0	0	0	0	0
		X250	0	0	0	0	0	0	0	0	0	0	0	0	0	0	0	0	0
		B409	0	0	0	0	0	0	0	0	0	0	0	0	0	0	0	0	0
		V244	0	0	0	0	0	0	0	0	0	0	0	0	0	0	0	0	0
		I010	0	0	0	0	0	0	0	0	0	0	0	0	0	0	0	0	0
		W209	0	0	0	0	0	0	0	0	0	0	0	0	0	0	0	0	0
		C254	0	0	0	0	0	0	0	0	0	0	0	0	0	0	0	0	0
		M489	0	0	0	0	0	0	0	0	0	0	0	0	0	0	0	0	0
		C630	0	0	0	0	0	0	0	0	0	0	0	0	0	0	0	0	0
		C12	0	0	0	0	0	0	0	0	0	0	0	0	0	0	0	0	0
		I440	0	0	0	0	0	0	0	0	0	0	0	0	0	0	0	0	0
		K400	0	0	0	0	0	0	0	0	0	0	0	0	0	0	0	0	0
		Q019	0	0	0	0	0	0	0	0	0	0	0	0	0	0	0	0	0
		J851	0	0	0	0	0	0	0	0	0	0	0	0	0	0	0	0	0
		D691	0	0	0	0	0	0	0	0	0	0	0	0	0	0	0	0	0
		W139	0	0	0	0	0	0	0	0	0	0	0	0	0	0	0	0	0
		D379	0	0	0	0	0	0	0	0	0	0	0	0	0	0	0	0	0
		C758	0	0	0	0	0	0	0	0	0	0	0	0	0	0	0	0	0
		D319	0	0	0	0	0	0	0	0	0	0	0	0	0	0	0	0	0
		C062	0	0	0	0	0	0	0	0	0	0	0	0	0	0	0	0	0
		G062	0	0	0	0	0	0	0	0	0	0	0	0	0	0	0	0	0
		C714	0	0	0	0	0	0	0	0	0	0	0	0	0	0	0	0	0
		V144	0	0	0	0	0	0	0	0	0	0	0	0	0	0	0	0	0
		N832	0	0	0	0	0	0	0	0	0	0	0	0	0	0	0	0	0
		C450	0	0	0	0	0	0	0	0	0	0	0	0	0	0	0	0	0
		V102	0	0	0	0	0	0	0	0	0	0	0	0	0	0	0	0	0
		A058	0	0	0	0	0	0	0	0	0	0	0	0	0	0	0	0	0
		D390	0	0	0	0	0	0	0	0	0	0	0	0	0	0	0	0	0
		K519	0	0	0	0	0	0	0	0	0	0	0	0	0	0	0	0	0
		M358	0	0	0	0	0	0	0	0	0	0	0	0	0	0	0	0	0
		M340	0	0	0	0	0	0	0	0	0	0	0	0	0	0	0	0	0
		Y319	0	0	0	0	0	0	0	0	0	0	0	0	0	0	0	0	0
		X230	0	0	0	0	0	0	0	0	0	0	0	0	0	0	0	0	0
		E700	0	0	0	0	0	0	0	0	0	0	0	0	0	0	0	0	0
		M303	0	0	0	0	0	0	0	0	0	0	0	0	0	0	0	0	0
		C917	0	0	0	0	0	0	0	0	0	0	0	0	0	0	0	0	0
		D461	0	0	0	0	0	0	0	0	0	0	0	0	0	0	0	0	0
		C165	0	0	0	0	0	0	0	0	0	0	0	0	0	0	0	0	0
		W170	0	0	0	0	0	0	0	0	0	0	0	0	0	0	0	0	0
		J680	0	0	0	0	0	0	0	0	0	0	0	0	0	0	0	0	0
		P010	0	0	0	0	0	0	0	0	0	0	0	0	0	0	0	0	0
		C321	0	0	0	0	0	0	0	0	0	0	0	0	0	0	0	0	0
		C059	0	0	0	0	0	0	0	0	0	0	0	0	0	0	0	0	0
		O988	0	0	0	0	0	0	0	0	0	0	0	0	0	0	0	0	0
		Q242	0	0	0	0	0	0	0	0	0	0	0	0	0	0	0	0	0
		F412	0	0	0	0	0	0	0	0	0	0	0	0	0	0	0	0	0
		F122	0	0	0	0	0	0	0	0	0	0	0	0	0	0	0	0	0
		K508	0	0	0	0	0	0	0	0	0	0	0	0	0	0	0	0	0
		O265	0	0	0	0	0	0	0	0	0	0	0	0	0	0	0	0	0
		P229	0	0	0	0	0	0	0	0	0	0	0	0	0	0	0	0	0
		I061	0	0	0	0	0	0	0	0	0	0	0	0	0	0	0	0	0
		E619	0	0	0	0	0	0	0	0	0	0	0	0	0	0	0	0	0
		F89	0	0	0	0	0	0	0	0	0	0	0	0	0	0	0	0	0
		Q234	0	0	0	0	0	0	0	0	0	0	0	0	0	0	0	0	0
		X979	0	0	0	0	0	0	0	0	0	0	0	0	0	0	0	0	0
		A270	0	0	0	0	0	0	0	0	0	0	0	0	0	0	0	0	0
		B334	0	0	0	0	0	0	0	0	0	0	0	0	0	0	0	0	0
		C838	0	0	0	0	0	0	0	0	0	0	0	0	0	0	0	0	0
		K280	0	0	0	0	0	0	0	0	0	0	0	0	0	0	0	0	0
		W142	0	0	0	0	0	0	0	0	0	0	0	0	0	0	0	0	0
		G112	0	0	0	0	0	0	0	0	0	0	0	0	0	0	0	0	0
		X338	0	0	0	0	0	0	0	0	0	0	0	0	0	0	0	0	0
		A430	0	0	0	0	0	0	0	0	0	0	0	0	0	0	0	0	0
		O120	0	0	0	0	0	0	0	0	0	0	0	0	0	0	0	0	0
		A160	0	0	0	0	0	0	0	0	0	0	0	0	0	0	0	0	0
		A988	0	0	0	0	0	0	0	0	0	0	0	0	0	0	0	0	0
		G800	0	0	0	0	0	0	0	0	0	0	0	0	0	0	0	0	0
		J678	0	0	0	0	0	0	0	0	0	0	0	0	0	0	0	0	0
		A99	0	0	0	0	0	0	0	0	0	0	0	0	0	0	0	0	0
		B49	0	0	0	0	0	0	0	0	0	0	0	0	0	0	0	0	0
		V184	0	0	0	0	0	0	0	0	0	0	0	0	0	0	0	0	0
		O720	0	0	0	0	0	0	0	0	0	0	0	0	0	0	0	0	0
		M308	0	0	0	0	0	0	0	0	0	0	0	0	0	0	0	0	0
		K633	0	0	0	0	0	0	0	0	0	0	0	0	0	0	0	0	0
		V942	0	0	0	0	0	0	0	0	0	0	0	0	0	0	0	0	0
		B190	0	0	0	0	0	0	0	0	0	0	0	0	0	0	0	0	0
		N171	0	0	0	0	0	0	0	0	0	0	0	0	0	0	0	0	0
		C050	0	0	0	0	0	0	0	0	0	0	0	0	0	0	0	0	0
		V536	0	0	0	0	0	0	0	0	0	0	0	0	0	0	0	0	0
		E721	0	0	0	0	0	0	0	0	0	0	0	0	0	0	0	0	0
		C153	0	0	0	0	0	0	0	0	0	0	0	0	0	0	0	0	0
		P369	0	0	0	0	0	0	0	0	0	0	0	0	0	0	0	0	0
		C718	0	0	0	0	0	0	0	0	0	0	0	0	0	0	0	0	0
		I779	0	0	0	0	0	0	0	0	0	0	0	0	0	0	0	0	0
		C495	0	0	0	0	0	0	0	0	0	0	0	0	0	0	0	0	0
		J386	0	0	0	0	0	0	0	0	0	0	0	0	0	0	0	0	0
		X610	0	0	0	0	0	0	0	0	0	0	0	0	0	0	0	0	0
		E349	0	0	0	0	0	0	0	0	0	0	0	0	0	0	0	0	0
		X899	0	0	0	0	0	0	0	0	0	0	0	0	0	0	0	0	0
		G603	0	0	0	0	0	0	0	0	0	0	0	0	0	0	0	0	0
		K294	0	0	0	0	0	0	0	0	0	0	0	0	0	0	0	0	0
		W540	0	0	0	0	0	0	0	0	0	0	0	0	0	0	0	0	0
		I770	0	0	0	0	0	0	0	0	0	0	0	0	0	0	0	0	0
		C171	0	0	0	0	0	0	0	0	0	0	0	0	0	0	0	0	0
		M154	0	0	0	0	0	0	0	0	0	0	0	0	0	0	0	0	0
		K909	0	0	0	0	0	0	0	0	0	0	0	0	0	0	0	0	0
		N394	0	0	0	0	0	0	0	0	0	0	0	0	0	0	0	0	0
		L029	0	0	0	0	0	0	0	0	0	0	0	0	0	0	0	0	0
		J635	0	0	0	0	0	0	0	0	0	0	0	0	0	0	0	0	0
		E309	0	0	0	0	0	0	0	0	0	0	0	0	0	0	0	0	0
		W780	0	0	0	0	0	0	0	0	0	0	0	0	0	0	0	0	0
		D733	0	0	0	0	0	0	0	0	0	0	0	0	0	0	0	0	0
		B020	0	0	0	0	0	0	0	0	0	0	0	0	0	0	0	0	0
		K451	0	0	0	0	0	0	0	0	0	0	0	0	0	0	0	0	0
		D352	0	0	0	0	0	0	0	0	0	0	0	0	0	0	0	0	0
		A920	0	0	0	0	0	0	0	0	0	0	0	0	0	0	0	0	0
		M629	0	0	0	0	0	0	0	0	0	0	0	0	0	0	0	0	0
		A929	0	0	0	0	0	0	0	0	0	0	0	0	0	0	0	0	0
		B469	0	0	0	0	0	0	0	0	0	0	0	0	0	0	0	0	0
		O868	0	0	0	0	0	0	0	0	0	0	0	0	0	0	0	0	0
		D460	0	0	0	0	0	0	0	0	0	0	0	0	0	0	0	0	0
		J634	0	0	0	0	0	0	0	0	0	0	0	0	0	0	0	0	0
		I889	0	0	0	0	0	0	0	0	0	0	0	0	0	0	0	0	0
		W188	0	0	0	0	0	0	0	0	0	0	0	0	0	0	0	0	0
		O441	0	0	0	0	0	0	0	0	0	0	0	0	0	0	0	0	0
		B341	0	0	0	0	0	0	0	0	0	0	0	0	0	0	0	0	0
		J320	0	0	0	0	0	0	0	0	0	0	0	0	0	0	0	0	0
		C227	0	0	0	0	0	0	0	0	0	0	0	0	0	0	0	0	0
		C108	0	0	0	0	0	0	0	0	0	0	0	0	0	0	0	0	0
		P284	0	0	0	0	0	0	0	0	0	0	0	0	0	0	0	0	0
		K719	0	0	0	0	0	0	0	0	0	0	0	0	0	0	0	0	0
		Q061	0	0	0	0	0	0	0	0	0	0	0	0	0	0	0	0	0
		Q218	0	0	0	0	0	0	0	0	0	0	0	0	0	0	0	0	0
		X490	0	0	0	0	0	0	0	0	0	0	0	0	0	0	0	0	0
		C461	0	0	0	0	0	0	0	0	0	0	0	0	0	0	0	0	0
		N201	0	0	0	0	0	0	0	0	0	0	0	0	0	0	0	0	0
		P243	0	0	0	0	0	0	0	0	0	0	0	0	0	0	0	0	0
		V030	0	0	0	0	0	0	0	0	0	0	0	0	0	0	0	0	0
		A609	0	0	0	0	0	0	0	0	0	0	0	0	0	0	0	0	0
		Y128	0	0	0	0	0	0	0	0	0	0	0	0	0	0	0	0	0
		I773	0	0	0	0	0	0	0	0	0	0	0	0	0	0	0	0	0
		J920	0	0	0	0	0	0	0	0	0	0	0	0	0	0	0	0	0
		V576	0	0	0	0	0	0	0	0	0	0	0	0	0	0	0	0	0
		C211	0	0	0	0	0	0	0	0	0	0	0	0	0	0	0	0	0
		E849	0	0	0	0	0	0	0	0	0	0	0	0	0	0	0	0	0
		E40	0	0	0	0	0	0	0	0	0	0	0	0	0	0	0	0	0
		X401	0	0	0	0	0	0	0	0	0	0	0	0	0	0	0	0	0
		X690	0	0	0	0	0	0	0	0	0	0	0	0	0	0	0	0	0
		N700	0	0	0	0	0	0	0	0	0	0	0	0	0	0	0	0	0
		V498	0	0	0	0	0	0	0	0	0	0	0	0	0	0	0	0	0
		C399	0	0	0	0	0	0	0	0	0	0	0	0	0	0	0	0	0
		J661	0	0	0	0	0	0	0	0	0	0	0	0	0	0	0	0	0
		N391	0	0	0	0	0	0	0	0	0	0	0	0	0	0	0	0	0
		F189	0	0	0	0	0	0	0	0	0	0	0	0	0	0	0	0	0
		F206	0	0	0	0	0	0	0	0	0	0	0	0	0	0	0	0	0
		C66	0	0	0	0	0	0	0	0	0	0	0	0	0	0	0	0	0
		W834	0	0	0	0	0	0	0	0	0	0	0	0	0	0	0	0	0
		D486	0	0	0	0	0	0	0	0	0	0	0	0	0	0	0	0	0
		X619	0	0	0	0	0	0	0	0	0	0	0	0	0	0	0	0	0
		D103	0	0	0	0	0	0	0	0	0	0	0	0	0	0	0	0	0
		X220	0	0	0	0	0	0	0	0	0	0	0	0	0	0	0	0	0
		X422	0	0	0	0	0	0	0	0	0	0	0	0	0	0	0	0	0
		I129	0	0	0	0	0	0	0	0	0	0	0	0	0	0	0	0	0
		W014	0	0	0	0	0	0	0	0	0	0	0	0	0	0	0	0	0
		G960	0	0	0	0	0	0	0	0	0	0	0	0	0	0	0	0	0
		C408	0	0	0	0	0	0	0	0	0	0	0	0	0	0	0	0	0
		N136	0	0	0	0	0	0	0	0	0	0	0	0	0	0	0	0	0
		X238	0	0	0	0	0	0	0	0	0	0	0	0	0	0	0	0	0
		K121	0	0	0	0	0	0	0	0	0	0	0	0	0	0	0	0	0
		C493	0	0	0	0	0	0	0	0	0	0	0	0	0	0	0	0	0
		Y712	0	0	0	0	0	0	0	0	0	0	0	0	0	0	0	0	0
		J668	0	0	0	0	0	0	0	0	0	0	0	0	0	0	0	0	0
		C024	0	0	0	0	0	0	0	0	0	0	0	0	0	0	0	0	0
		W875	0	0	0	0	0	0	0	0	0	0	0	0	0	0	0	0	0
		W178	0	0	0	0	0	0	0	0	0	0	0	0	0	0	0	0	0
		C902	0	0	0	0	0	0	0	0	0	0	0	0	0	0	0	0	0
		V119	0	0	0	0	0	0	0	0	0	0	0	0	0	0	0	0	0
		X100	0	0	0	0	0	0	0	0	0	0	0	0	0	0	0	0	0
		Q439	0	0	0	0	0	0	0	0	0	0	0	0	0	0	0	0	0
		F438	0	0	0	0	0	0	0	0	0	0	0	0	0	0	0	0	0
		B220	0	0	0	0	0	0	0	0	0	0	0	0	0	0	0	0	0
		Y049	0	0	0	0	0	0	0	0	0	0	0	0	0	0	0	0	0
		X939	0	0	0	0	0	0	0	0	0	0	0	0	0	0	0	0	0
		C118	0	0	0	0	0	0	0	0	0	0	0	0	0	0	0	0	0
		C138	0	0	0	0	0	0	0	0	0	0	0	0	0	0	0	0	0
		N509	0	0	0	0	0	0	0	0	0	0	0	0	0	0	0	0	0
[truncated: 181 more rows]

## Sheet: Northeast
		UCs	2006	2007	2008	2009	2010	2011	2012	2013	2014	2015	2016	2017	2018	2019	2020	TOTAL	%
[truncated: 2,180 more rows]

## Sheet: Midwest
		UCs	2006	2007	2008	2009	2010	2011	2012	2013	2014	2015	2016	2017	2018	2019	2020	TOTAL	%
[truncated: 2,180 more rows]

## Sheet: Southeast
		UCs	2006	2007	2008	2009	2010	2011	2012	2013	2014	2015	2016	2017	2018	2019	2020	TOTAL	%
[truncated: 2,180 more rows]

[truncated: 3 more sheets: South, UPSLIDE_UndoFormatting, UPSLIDE_Undo]
